# Supplementary material for: Gut microbiome-wide association study of depression
Source: Research Square preprint supplement (doi:10.21203/rs.3.rs-570388/v1), 2021-06-08
Supplement: Supplementary file 2 [file 3a60048b441d699491dd895f.xlsx]

## Sheet: Supplementary Table 1
Instruments for Major Depression
SNP	TAXON	alleles	eff.allele	BETA_microb	SE_microb	metaZ.wz	P.wz	N	Ncohorts	effect_MDD	SE_MDD	A1_MDD	FREQ_MDD	BETA_flip_microb
1:175913828	family.Ruminococcaceae.id.2050	T/C	T	0.01151	0.01081	1.0342	0.301043	18468	25	-0.0214	0.0023	T	0.3767	0.01151
1:175913828	genus..Eubacteriumventriosumgroup.id.11341	T/C	T	0.01575	0.01182	1.3376	0.181027	15421	25	-0.0214	0.0023	T	0.3767	0.01575
1:175913828	genus..Ruminococcusgauvreauiigroup.id.11342	T/C	T	0.00432	0.01262	0.3532	0.723939	13515	25	-0.0214	0.0023	T	0.3767	0.00432
1:175913828	genus.Coprococcus3.id.11303	T/C	T	-0.01869	0.01162	-1.6197	0.105275	15968	25	-0.0214	0.0023	T	0.3767	-0.01869
1:175913828	genus.Eggerthella.id.819	T/C	T	-0.03358	0.02038	-1.6087	0.10766	5203	23	-0.0214	0.0023	T	0.3767	-0.03358
1:175913828	genus.Hungatella.id.11306	T/C	T	-0.04938	0.02241	-2.1735	0.0297352	4279	23	-0.0214	0.0023	T	0.3767	-0.04938
1:175913828	genus.Lachnoclostridium.id.11308	T/C	T	-0.01306	0.01093	-1.1963	0.231541	18055	25	-0.0214	0.0023	T	0.3767	-0.01306
1:175913828	genus.LachnospiraceaeUCG001.id.11321	T/C	T	-0.01142	0.01452	-0.7971	0.425335	10258	25	-0.0214	0.0023	T	0.3767	-0.01142
1:175913828	genus.RuminococcaceaeUCG002.id.11360	T/C	T	-0.01061	0.01119	-0.9438	0.34517	17230	25	-0.0214	0.0023	T	0.3767	-0.01061
1:175913828	genus.RuminococcaceaeUCG003.id.11361	T/C	T	0.01917	0.01218	1.5156	0.129671	14534	25	-0.0214	0.0023	T	0.3767	0.01917
1:175913828	genus.RuminococcaceaeUCG005.id.11363	T/C	T	0.00515	0.01153	0.4431	0.657766	16236	25	-0.0214	0.0023	T	0.3767	0.00515
1:175913828	genus.Sellimonas.id.14369	T/C	T	-0.04254	0.02603	-1.594	0.110891	3202	22	-0.0214	0.0023	T	0.3767	-0.04254
1:175913828	genus.Subdoligranulum.id.2070	T/C	T	0.00672	0.01103	0.5855	0.558279	17724	25	-0.0214	0.0023	T	0.3767	0.00672
1:181740924	family.Ruminococcaceae.id.2050	G/A	G	-0.01819	0.01232	-1.4706	0.141399	17655	24	-0.017	0.0025	A	0.753	0.01819
1:181740924	genus..Eubacteriumventriosumgroup.id.11341	G/A	G	0.00847	0.01354	0.5893	0.555727	14710	24	-0.017	0.0025	A	0.753	-0.00847
1:181740924	genus..Ruminococcusgauvreauiigroup.id.11342	G/A	G	0.00888	0.0144	0.6585	0.510281	12970	24	-0.017	0.0025	A	0.753	-0.00888
1:181740924	genus.Coprococcus3.id.11303	G/A	G	0.01871	0.01326	1.3804	0.167464	15286	24	-0.017	0.0025	A	0.753	-0.01871
1:181740924	genus.Eggerthella.id.819	G/A	G	0.01699	0.02319	0.7429	0.457603	4962	22	-0.017	0.0025	A	0.753	-0.01699
1:181740924	genus.Hungatella.id.11306	G/A	G	0.00521	0.02558	0.1735	0.862337	4078	22	-0.017	0.0025	A	0.753	-0.00521
1:181740924	genus.Lachnoclostridium.id.11308	G/A	G	0.02704	0.01248	2.1667	0.0302654	17244	24	-0.017	0.0025	A	0.753	-0.02704
1:181740924	genus.LachnospiraceaeUCG001.id.11321	G/A	G	-0.00586	0.01639	-0.3805	0.7035	10025	24	-0.017	0.0025	A	0.753	0.00586
1:181740924	genus.RuminococcaceaeUCG002.id.11360	G/A	G	-0.01644	0.01276	-1.2797	0.200615	16507	24	-0.017	0.0025	A	0.753	0.01644
1:181740924	genus.RuminococcaceaeUCG003.id.11361	G/A	G	-0.0003	0.01392	-0.004	0.996808	13857	24	-0.017	0.0025	A	0.753	0.0003
1:181740924	genus.RuminococcaceaeUCG005.id.11363	G/A	G	-0.01038	0.01312	-0.7594	0.447494	15606	24	-0.017	0.0025	A	0.753	0.01038
1:181740924	genus.Sellimonas.id.14369	G/A	G	0.02009	0.02888	0.6589	0.510024	3202	22	-0.017	0.0025	A	0.753	-0.02009
1:181740924	genus.Subdoligranulum.id.2070	G/A	G	0.00068	0.01259	0.0488	0.961079	16951	24	-0.017	0.0025	A	0.753	-0.00068
1:197704717	family.Ruminococcaceae.id.2050	C/T	T	0.02863	0.01354	2.1705	0.0299766	18468	25	-0.0243	0.0027	T	0.2091	0.02863
1:197704717	genus..Eubacteriumventriosumgroup.id.11341	C/T	T	0.02177	0.01478	1.6129	0.106788	15421	25	-0.0243	0.0027	T	0.2091	0.02177
1:197704717	genus..Ruminococcusgauvreauiigroup.id.11342	C/T	T	-0.00228	0.01577	-0.0735	0.941329	13515	25	-0.0243	0.0027	T	0.2091	-0.00228
1:197704717	genus.Coprococcus3.id.11303	C/T	T	0.00474	0.01455	0.287	0.774265	15968	25	-0.0243	0.0027	T	0.2091	0.00474
1:197704717	genus.Eggerthella.id.819	C/T	T	0.01363	0.02517	0.4777	0.632935	5203	23	-0.0243	0.0027	T	0.2091	0.01363
1:197704717	genus.Hungatella.id.11306	C/T	T	0.00431	0.02774	0.1162	0.907494	4267	22	-0.0243	0.0027	T	0.2091	0.00431
1:197704717	genus.Lachnoclostridium.id.11308	C/T	T	0.0185	0.01369	1.335	0.181942	18055	25	-0.0243	0.0027	T	0.2091	0.0185
1:197704717	genus.LachnospiraceaeUCG001.id.11321	C/T	T	0.00523	0.01799	0.3099	0.756713	10258	25	-0.0243	0.0027	T	0.2091	0.00523
1:197704717	genus.RuminococcaceaeUCG002.id.11360	C/T	T	0.00942	0.014	0.7143	0.475104	17230	25	-0.0243	0.0027	T	0.2091	0.00942
1:197704717	genus.RuminococcaceaeUCG003.id.11361	C/T	T	-0.01653	0.01526	-1.0957	0.273166	14534	25	-0.0243	0.0027	T	0.2091	-0.01653
1:197704717	genus.RuminococcaceaeUCG005.id.11363	C/T	T	0.01701	0.01441	1.3424	0.179466	16236	25	-0.0243	0.0027	T	0.2091	0.01701
1:197704717	genus.Sellimonas.id.14369	C/T	T	0.04959	0.03175	1.5077	0.131657	3202	22	-0.0243	0.0027	T	0.2091	0.04959
1:197704717	genus.Subdoligranulum.id.2070	C/T	T	0.00111	0.01382	0.0802	0.936078	17724	25	-0.0243	0.0027	T	0.2091	0.00111
1:37192741	family.Ruminococcaceae.id.2050	T/C	C	-0.00659	0.01129	-0.6204	0.534863	18468	25	-0.021	0.0024	T	0.7033	0.00659
1:37192741	genus..Eubacteriumventriosumgroup.id.11341	T/C	C	0.00668	0.01237	0.5329	0.594172	15421	25	-0.021	0.0024	T	0.7033	-0.00668
1:37192741	genus..Ruminococcusgauvreauiigroup.id.11342	T/C	C	-0.01272	0.01322	-0.9605	0.336753	13515	25	-0.021	0.0024	T	0.7033	0.01272
1:37192741	genus.Coprococcus3.id.11303	T/C	C	-0.02391	0.01215	-1.8998	0.0574594	15968	25	-0.021	0.0024	T	0.7033	0.02391
1:37192741	genus.Eggerthella.id.819	T/C	C	0.01062	0.02133	0.4932	0.622013	5203	23	-0.021	0.0024	T	0.7033	-0.01062
1:37192741	genus.Hungatella.id.11306	T/C	C	0.0165	0.02333	0.7489	0.453978	4279	23	-0.021	0.0024	T	0.7033	-0.0165
1:37192741	genus.Lachnoclostridium.id.11308	T/C	C	0.02082	0.01142	1.8491	0.0644578	18055	25	-0.021	0.0024	T	0.7033	-0.02082
1:37192741	genus.LachnospiraceaeUCG001.id.11321	T/C	C	-0.00792	0.01518	-0.4908	0.623426	10258	25	-0.021	0.0024	T	0.7033	0.00792
1:37192741	genus.RuminococcaceaeUCG002.id.11360	T/C	C	0.00029	0.0117	0.0333	0.973515	17230	25	-0.021	0.0024	T	0.7033	-0.00029
1:37192741	genus.RuminococcaceaeUCG003.id.11361	T/C	C	0.01529	0.01271	1.1597	0.246212	14534	25	-0.021	0.0024	T	0.7033	-0.01529
1:37192741	genus.RuminococcaceaeUCG005.id.11363	T/C	C	0.0051	0.01205	0.415	0.678142	16236	25	-0.021	0.0024	T	0.7033	-0.0051
1:37192741	genus.Sellimonas.id.14369	T/C	C	0.01037	0.02729	0.3615	0.7178	3202	22	-0.021	0.0024	T	0.7033	-0.01037
1:37192741	genus.Subdoligranulum.id.2070	T/C	C	-0.00365	0.01153	-0.2903	0.77151	17724	25	-0.021	0.0024	T	0.7033	0.00365
1:50559162	family.Ruminococcaceae.id.2050	A/G	G	0.00388	0.01734	0.1927	0.847272	17543	23	0.032	0.0037	A	0.9067	-0.00388
1:50559162	genus..Eubacteriumventriosumgroup.id.11341	A/G	G	-0.01609	0.01904	-0.8987	0.368759	14634	23	0.032	0.0037	A	0.9067	0.01609
1:50559162	genus..Ruminococcusgauvreauiigroup.id.11342	A/G	G	0.0031	0.02032	0.183	0.854955	12885	23	0.032	0.0037	A	0.9067	-0.0031
1:50559162	genus.Coprococcus3.id.11303	A/G	G	-0.00766	0.01865	-0.3119	0.755041	15194	23	0.032	0.0037	A	0.9067	0.00766
1:50559162	genus.Eggerthella.id.819	A/G	G	-0.04599	0.03281	-1.3794	0.16771	4898	21	0.032	0.0037	A	0.9067	0.04599
1:50559162	genus.Hungatella.id.11306	A/G	G	-0.00359	0.03649	-0.1408	0.88787	4020	21	0.032	0.0037	A	0.9067	0.00359
1:50559162	genus.Lachnoclostridium.id.11308	A/G	G	0.02307	0.01755	1.2697	0.204227	17132	23	0.032	0.0037	A	0.9067	-0.02307
1:50559162	genus.LachnospiraceaeUCG001.id.11321	A/G	G	0.01183	0.02302	0.5136	0.607672	9973	23	0.032	0.0037	A	0.9067	-0.01183
1:50559162	genus.RuminococcaceaeUCG002.id.11360	A/G	G	0.0123	0.01793	0.6894	0.490697	16415	23	0.032	0.0037	A	0.9067	-0.0123
1:50559162	genus.RuminococcaceaeUCG003.id.11361	A/G	G	-0.03163	0.01959	-1.6468	0.0995992	13770	23	0.032	0.0037	A	0.9067	0.03163
1:50559162	genus.RuminococcaceaeUCG005.id.11363	A/G	G	-0.01936	0.01843	-1.0998	0.271419	15514	23	0.032	0.0037	A	0.9067	0.01936
1:50559162	genus.Sellimonas.id.14369	A/G	G	-0.1308	0.04074	-3.2016	0.00136572	3154	21	0.032	0.0037	A	0.9067	0.1308
1:50559162	genus.Subdoligranulum.id.2070	A/G	G	-0.00858	0.0177	-0.4733	0.635928	16846	23	0.032	0.0037	A	0.9067	0.00858
1:52342427	family.Ruminococcaceae.id.2050	T/C	C	-0.00366	0.01065	-0.22	0.825871	18468	25	-0.0194	0.0022	T	0.4671	0.00366
1:52342427	genus..Eubacteriumventriosumgroup.id.11341	T/C	C	0.00175	0.01165	0.0601	0.952156	15421	25	-0.0194	0.0022	T	0.4671	-0.00175
1:52342427	genus..Ruminococcusgauvreauiigroup.id.11342	T/C	C	-0.00623	0.01242	-0.5146	0.606833	13515	25	-0.0194	0.0022	T	0.4671	0.00623
1:52342427	genus.Coprococcus3.id.11303	T/C	C	-0.02893	0.01144	-2.5671	0.0102524	15968	25	-0.0194	0.0022	T	0.4671	0.02893
1:52342427	genus.Eggerthella.id.819	T/C	C	-0.01869	0.02001	-0.9624	0.335748	5203	23	-0.0194	0.0022	T	0.4671	0.01869
1:52342427	genus.Hungatella.id.11306	T/C	C	0.01815	0.0221	1.0295	0.303292	4279	23	-0.0194	0.0022	T	0.4671	-0.01815
1:52342427	genus.Lachnoclostridium.id.11308	T/C	C	0.00306	0.01077	0.3268	0.74397	18055	25	-0.0194	0.0022	T	0.4671	-0.00306
1:52342427	genus.LachnospiraceaeUCG001.id.11321	T/C	C	-0.00111	0.01415	0.054	0.956935	10258	25	-0.0194	0.0022	T	0.4671	0.00111
1:52342427	genus.RuminococcaceaeUCG002.id.11360	T/C	C	-0.00365	0.01101	-0.306	0.759452	17230	25	-0.0194	0.0022	T	0.4671	0.00365
1:52342427	genus.RuminococcaceaeUCG003.id.11361	T/C	C	0.01983	0.01201	1.6213	0.104975	14534	25	-0.0194	0.0022	T	0.4671	-0.01983
1:52342427	genus.RuminococcaceaeUCG005.id.11363	T/C	C	-0.01421	0.01133	-1.3089	0.190534	16236	25	-0.0194	0.0022	T	0.4671	0.01421
1:52342427	genus.Sellimonas.id.14369	T/C	C	-0.0235	0.02505	-0.9325	0.351027	3202	22	-0.0194	0.0022	T	0.4671	0.0235
1:52342427	genus.Subdoligranulum.id.2070	T/C	C	-0.01591	0.01087	-1.5521	0.120614	17724	25	-0.0194	0.0022	T	0.4671	0.01591
1:67146817	family.Ruminococcaceae.id.2050	T/C	C	0.01053	0.01076	0.8916	0.372607	18468	25	0.0137	0.0022	T	0.5661	-0.01053
1:67146817	genus..Eubacteriumventriosumgroup.id.11341	T/C	C	0.01287	0.01173	1.2042	0.22859	15421	25	0.0137	0.0022	T	0.5661	-0.01287
1:67146817	genus..Ruminococcusgauvreauiigroup.id.11342	T/C	C	-0.01418	0.01253	-1.2529	0.210206	13515	25	0.0137	0.0022	T	0.5661	0.01418
1:67146817	genus.Coprococcus3.id.11303	T/C	C	0.00107	0.01155	0.0312	0.97527	15968	25	0.0137	0.0022	T	0.5661	-0.00107
1:67146817	genus.Eggerthella.id.819	T/C	C	0.02098	0.02014	1.184	0.236492	5203	23	0.0137	0.0022	T	0.5661	-0.02098
1:67146817	genus.Hungatella.id.11306	T/C	C	-0.02176	0.02228	-0.8807	0.378426	4279	23	0.0137	0.0022	T	0.5661	0.02176
1:67146817	genus.Lachnoclostridium.id.11308	T/C	C	-0.00881	0.01088	-0.87	0.384191	18055	25	0.0137	0.0022	T	0.5661	0.00881
1:67146817	genus.LachnospiraceaeUCG001.id.11321	T/C	C	-0.00243	0.01429	-0.1037	0.917328	10258	25	0.0137	0.0022	T	0.5661	0.00243
1:67146817	genus.RuminococcaceaeUCG002.id.11360	T/C	C	-0.01059	0.01112	-1.0279	0.30395	17230	25	0.0137	0.0022	T	0.5661	0.01059
1:67146817	genus.RuminococcaceaeUCG003.id.11361	T/C	C	0.00403	0.01213	0.4301	0.667196	14534	25	0.0137	0.0022	T	0.5661	-0.00403
1:67146817	genus.RuminococcaceaeUCG005.id.11363	T/C	C	-0.00361	0.01144	-0.2993	0.764635	16236	25	0.0137	0.0022	T	0.5661	0.00361
1:67146817	genus.Sellimonas.id.14369	T/C	C	0.00672	0.02532	0.2584	0.796253	3202	22	0.0137	0.0022	T	0.5661	-0.00672
1:67146817	genus.Subdoligranulum.id.2070	T/C	C	0.00922	0.01097	0.83	0.406652	17724	25	0.0137	0.0022	T	0.5661	-0.00922
1:72765116	family.Ruminococcaceae.id.2050	G/A	G	-0.01261	0.01089	-1.1583	0.246701	18468	25	0.0336	0.0022	A	0.6156	0.01261
1:72765116	genus..Eubacteriumventriosumgroup.id.11341	G/A	G	-0.00019	0.01189	-0.0343	0.972558	15421	25	0.0336	0.0022	A	0.6156	0.00019
1:72765116	genus..Ruminococcusgauvreauiigroup.id.11342	G/A	G	-0.03192	0.01268	-2.4474	0.0143811	13515	25	0.0336	0.0022	A	0.6156	0.03192
1:72765116	genus.Coprococcus3.id.11303	G/A	G	-0.02106	0.01169	-1.8433	0.0652706	15968	25	0.0336	0.0022	A	0.6156	0.02106
1:72765116	genus.Eggerthella.id.819	G/A	G	-0.02308	0.02038	-1.1429	0.253039	5203	23	0.0336	0.0022	A	0.6156	0.02308
1:72765116	genus.Hungatella.id.11306	G/A	G	-0.01128	0.02262	-0.6105	0.541464	4279	23	0.0336	0.0022	A	0.6156	0.01128
1:72765116	genus.Lachnoclostridium.id.11308	G/A	G	-0.00405	0.01102	-0.3277	0.743063	18055	25	0.0336	0.0022	A	0.6156	0.00405
1:72765116	genus.LachnospiraceaeUCG001.id.11321	G/A	G	-0.01425	0.01445	-1.0491	0.294086	10258	25	0.0336	0.0022	A	0.6156	0.01425
1:72765116	genus.RuminococcaceaeUCG002.id.11360	G/A	G	0.01237	0.01126	1.3064	0.191417	17230	25	0.0336	0.0022	A	0.6156	-0.01237
1:72765116	genus.RuminococcaceaeUCG003.id.11361	G/A	G	0.01048	0.01229	0.8709	0.383863	14534	25	0.0336	0.0022	A	0.6156	-0.01048
1:72765116	genus.RuminococcaceaeUCG005.id.11363	G/A	G	-0.00029	0.01157	0.092	0.926698	16236	25	0.0336	0.0022	A	0.6156	0.00029
1:72765116	genus.Sellimonas.id.14369	G/A	G	-0.03938	0.02554	-1.5501	0.121094	3202	22	0.0336	0.0022	A	0.6156	0.03938
1:72765116	genus.Subdoligranulum.id.2070	G/A	G	-0.02025	0.01111	-1.7789	0.0752398	17724	25	0.0336	0.0022	A	0.6156	0.02025
1:73668836	family.Ruminococcaceae.id.2050	A/G	A	0.0118	0.01049	1.0974	0.272467	18467	25	-0.0267	0.0022	A	0.5156	0.0118
1:73668836	genus..Eubacteriumventriosumgroup.id.11341	A/G	A	-0.00462	0.01148	-0.4002	0.688862	15420	25	-0.0267	0.0022	A	0.5156	-0.00462
1:73668836	genus..Ruminococcusgauvreauiigroup.id.11342	A/G	A	-0.01904	0.01226	-1.5082	0.131503	13514	25	-0.0267	0.0022	A	0.5156	-0.01904
1:73668836	genus.Coprococcus3.id.11303	A/G	A	-0.00869	0.01128	-0.7598	0.447374	15967	25	-0.0267	0.0022	A	0.5156	-0.00869
1:73668836	genus.Eggerthella.id.819	A/G	A	0.0054	0.01978	0.2481	0.804134	5203	23	-0.0267	0.0022	A	0.5156	0.0054
1:73668836	genus.Hungatella.id.11306	A/G	A	0.02923	0.02184	1.3532	0.176056	4279	23	-0.0267	0.0022	A	0.5156	0.02923
1:73668836	genus.Lachnoclostridium.id.11308	A/G	A	0.00336	0.01061	0.3084	0.757778	18054	25	-0.0267	0.0022	A	0.5156	0.00336
1:73668836	genus.LachnospiraceaeUCG001.id.11321	A/G	A	0.0204	0.01403	1.4485	0.147505	10258	25	-0.0267	0.0022	A	0.5156	0.0204
1:73668836	genus.RuminococcaceaeUCG002.id.11360	A/G	A	0.00826	0.01086	0.7192	0.472018	17229	25	-0.0267	0.0022	A	0.5156	0.00826
1:73668836	genus.RuminococcaceaeUCG003.id.11361	A/G	A	0.01323	0.01183	1.1013	0.27081	14533	25	-0.0267	0.0022	A	0.5156	0.01323
1:73668836	genus.RuminococcaceaeUCG005.id.11363	A/G	A	0.02753	0.01118	2.4571	0.0140103	16235	25	-0.0267	0.0022	A	0.5156	0.02753
1:73668836	genus.Sellimonas.id.14369	A/G	A	0.01351	0.02506	0.5703	0.568542	3202	22	-0.0267	0.0022	A	0.5156	0.01351
1:73668836	genus.Subdoligranulum.id.2070	A/G	A	0.00024	0.01071	-0.0019	0.998404	17723	25	-0.0267	0.0022	A	0.5156	0.00024
1:80809636	family.Ruminococcaceae.id.2050	G/A	A	-0.00468	0.01202	-0.3174	0.75094	18468	25	0.0234	0.0025	A	0.2838	-0.00468
1:80809636	genus..Eubacteriumventriosumgroup.id.11341	G/A	A	0.01758	0.01312	1.3399	0.18031	15421	25	0.0234	0.0025	A	0.2838	0.01758
1:80809636	genus..Ruminococcusgauvreauiigroup.id.11342	G/A	A	-0.00171	0.01397	-0.0969	0.922726	13515	25	0.0234	0.0025	A	0.2838	-0.00171
1:80809636	genus.Coprococcus3.id.11303	G/A	A	-0.00555	0.0129	-0.2991	0.764787	15968	25	0.0234	0.0025	A	0.2838	-0.00555
1:80809636	genus.Eggerthella.id.819	G/A	A	0.00888	0.0225	0.2808	0.778864	5203	23	0.0234	0.0025	A	0.2838	0.00888
1:80809636	genus.Hungatella.id.11306	G/A	A	-0.00103	0.02488	-0.278	0.780859	4279	23	0.0234	0.0025	A	0.2838	-0.00103
1:80809636	genus.Lachnoclostridium.id.11308	G/A	A	0.02575	0.01215	2.0515	0.040228	18055	25	0.0234	0.0025	A	0.2838	0.02575
1:80809636	genus.LachnospiraceaeUCG001.id.11321	G/A	A	0.0099	0.01595	0.5372	0.591268	10258	25	0.0234	0.0025	A	0.2838	0.0099
1:80809636	genus.RuminococcaceaeUCG002.id.11360	G/A	A	0.00585	0.01242	0.4333	0.664869	17230	25	0.0234	0.0025	A	0.2838	0.00585
1:80809636	genus.RuminococcaceaeUCG003.id.11361	G/A	A	0.00986	0.01355	0.7603	0.447135	14534	25	0.0234	0.0025	A	0.2838	0.00986
1:80809636	genus.RuminococcaceaeUCG005.id.11363	G/A	A	0.00678	0.01277	0.418	0.676093	16236	25	0.0234	0.0025	A	0.2838	0.00678
1:80809636	genus.Sellimonas.id.14369	G/A	A	0.02427	0.02827	0.8626	0.388467	3202	22	0.0234	0.0025	A	0.2838	0.02427
1:80809636	genus.Subdoligranulum.id.2070	G/A	A	0.00985	0.01225	0.6646	0.506306	17724	25	0.0234	0.0025	A	0.2838	0.00985
1:8489302	family.Ruminococcaceae.id.2050	T/C	C	-0.00919	0.01065	-0.86	0.389679	18466	25	-0.0254	0.0022	T	0.5694	0.00919
1:8489302	genus..Eubacteriumventriosumgroup.id.11341	T/C	C	-0.00778	0.01165	-0.5556	0.578484	15419	25	-0.0254	0.0022	T	0.5694	0.00778
1:8489302	genus..Ruminococcusgauvreauiigroup.id.11342	T/C	C	0.01585	0.01243	1.1949	0.232165	13513	25	-0.0254	0.0022	T	0.5694	-0.01585
1:8489302	genus.Coprococcus3.id.11303	T/C	C	-0.00147	0.01145	-0.071	0.943398	15966	25	-0.0254	0.0022	T	0.5694	0.00147
1:8489302	genus.Eggerthella.id.819	T/C	C	0.03711	0.02001	1.8491	0.0644578	5203	23	-0.0254	0.0022	T	0.5694	-0.03711
1:8489302	genus.Hungatella.id.11306	T/C	C	0.01437	0.02209	0.598	0.54984	4278	23	-0.0254	0.0022	T	0.5694	-0.01437
1:8489302	genus.Lachnoclostridium.id.11308	T/C	C	-0.00157	0.01077	-0.0731	0.941647	18053	25	-0.0254	0.0022	T	0.5694	0.00157
1:8489302	genus.LachnospiraceaeUCG001.id.11321	T/C	C	-0.02051	0.01421	-1.4426	0.149077	10257	25	-0.0254	0.0022	T	0.5694	0.02051
1:8489302	genus.RuminococcaceaeUCG002.id.11360	T/C	C	-0.01018	0.01102	-0.8479	0.396438	17228	25	-0.0254	0.0022	T	0.5694	0.01018
1:8489302	genus.RuminococcaceaeUCG003.id.11361	T/C	C	-0.00657	0.01201	-0.6308	0.528171	14532	25	-0.0254	0.0022	T	0.5694	0.00657
1:8489302	genus.RuminococcaceaeUCG005.id.11363	T/C	C	-0.00272	0.01134	-0.2425	0.808315	16235	25	-0.0254	0.0022	T	0.5694	0.00272
1:8489302	genus.Sellimonas.id.14369	T/C	C	0.01261	0.02522	0.4987	0.618061	3202	22	-0.0254	0.0022	T	0.5694	-0.01261
1:8489302	genus.Subdoligranulum.id.2070	T/C	C	0.01101	0.01087	0.9885	0.322957	17722	25	-0.0254	0.0022	T	0.5694	-0.01101
10:106610839	family.Ruminococcaceae.id.2050	A/G	A	-0.00378	0.01115	-0.3192	0.749423	18468	25	0.0226	0.0023	A	0.3547	-0.00378
10:106610839	genus..Eubacteriumventriosumgroup.id.11341	A/G	A	0.00186	0.01218	0.0164	0.987075	15421	25	0.0226	0.0023	A	0.3547	0.00186
10:106610839	genus..Ruminococcusgauvreauiigroup.id.11342	A/G	A	-0.00483	0.013	-0.2645	0.791318	13515	25	0.0226	0.0023	A	0.3547	-0.00483
10:106610839	genus.Coprococcus3.id.11303	A/G	A	-0.01038	0.01197	-0.7549	0.450249	15968	25	0.0226	0.0023	A	0.3547	-0.01038
10:106610839	genus.Eggerthella.id.819	A/G	A	0.03687	0.02087	1.8773	0.0604907	5203	23	0.0226	0.0023	A	0.3547	0.03687
10:106610839	genus.Hungatella.id.11306	A/G	A	0.00708	0.0233	0.4243	0.67142	4279	23	0.0226	0.0023	A	0.3547	0.00708
10:106610839	genus.Lachnoclostridium.id.11308	A/G	A	0.00344	0.01128	0.3154	0.75261	18055	25	0.0226	0.0023	A	0.3547	0.00344
10:106610839	genus.LachnospiraceaeUCG001.id.11321	A/G	A	0.00323	0.01484	0.2054	0.837416	10258	25	0.0226	0.0023	A	0.3547	0.00323
10:106610839	genus.RuminococcaceaeUCG002.id.11360	A/G	A	-0.01033	0.01153	-1.0309	0.302541	17230	25	0.0226	0.0023	A	0.3547	-0.01033
10:106610839	genus.RuminococcaceaeUCG003.id.11361	A/G	A	0.01152	0.01258	0.8671	0.385942	14534	25	0.0226	0.0023	A	0.3547	0.01152
10:106610839	genus.RuminococcaceaeUCG005.id.11363	A/G	A	-0.00866	0.01186	-0.7827	0.433745	16236	25	0.0226	0.0023	A	0.3547	-0.00866
10:106610839	genus.Sellimonas.id.14369	A/G	A	0.01417	0.02638	0.514	0.607252	3202	22	0.0226	0.0023	A	0.3547	0.01417
10:106610839	genus.Subdoligranulum.id.2070	A/G	A	0.01077	0.01138	1.0322	0.302072	17724	25	0.0226	0.0023	A	0.3547	0.01077
10:1795194	family.Ruminococcaceae.id.2050	C/T	T	-8e-05	0.01073	0.0007	0.999521	18468	25	0.0163	0.0023	T	0.3795	-8e-05
10:1795194	genus..Eubacteriumventriosumgroup.id.11341	C/T	T	-0.01181	0.01171	-0.9788	0.32758	15421	25	0.0163	0.0023	T	0.3795	-0.01181
10:1795194	genus..Ruminococcusgauvreauiigroup.id.11342	C/T	T	-0.01231	0.01253	-0.9874	0.323447	13515	25	0.0163	0.0023	T	0.3795	-0.01231
10:1795194	genus.Coprococcus3.id.11303	C/T	T	-0.01098	0.01152	-0.9639	0.335046	15968	25	0.0163	0.0023	T	0.3795	-0.01098
10:1795194	genus.Eggerthella.id.819	C/T	T	0.02743	0.02005	1.3857	0.165869	5203	23	0.0163	0.0023	T	0.3795	0.02743
10:1795194	genus.Hungatella.id.11306	C/T	T	0.02757	0.02221	1.2559	0.209188	4279	23	0.0163	0.0023	T	0.3795	0.02757
10:1795194	genus.Lachnoclostridium.id.11308	C/T	T	0.00256	0.01085	0.2334	0.815451	18055	25	0.0163	0.0023	T	0.3795	0.00256
10:1795194	genus.LachnospiraceaeUCG001.id.11321	C/T	T	-0.01837	0.01434	-1.2692	0.20437	10258	25	0.0163	0.0023	T	0.3795	-0.01837
10:1795194	genus.RuminococcaceaeUCG002.id.11360	C/T	T	-0.00103	0.0111	-0.0853	0.931943	17230	25	0.0163	0.0023	T	0.3795	-0.00103
10:1795194	genus.RuminococcaceaeUCG003.id.11361	C/T	T	-0.00196	0.01208	-0.1635	0.870046	14534	25	0.0163	0.0023	T	0.3795	-0.00196
10:1795194	genus.RuminococcaceaeUCG005.id.11363	C/T	T	-0.00361	0.01143	-0.3046	0.760671	16236	25	0.0163	0.0023	T	0.3795	-0.00361
10:1795194	genus.Sellimonas.id.14369	C/T	T	0.02844	0.02564	1.1036	0.269767	3202	22	0.0163	0.0023	T	0.3795	0.02844
10:1795194	genus.Subdoligranulum.id.2070	C/T	T	-0.00321	0.01094	-0.2646	0.791318	17724	25	0.0163	0.0023	T	0.3795	-0.00321
11:113370758	family.Ruminococcaceae.id.2050	A/G	A	-0.00329	0.01106	-0.2492	0.803206	18467	25	-0.0289	0.0022	A	0.3682	-0.00329
11:113370758	genus..Eubacteriumventriosumgroup.id.11341	A/G	A	-0.00783	0.01207	-0.674	0.500184	15420	25	-0.0289	0.0022	A	0.3682	-0.00783
11:113370758	genus..Ruminococcusgauvreauiigroup.id.11342	A/G	A	0.0099	0.01288	0.7792	0.435862	13514	25	-0.0289	0.0022	A	0.3682	0.0099
11:113370758	genus.Coprococcus3.id.11303	A/G	A	0.00704	0.01187	0.6503	0.515563	15967	25	-0.0289	0.0022	A	0.3682	0.00704
11:113370758	genus.Eggerthella.id.819	A/G	A	-0.02023	0.02071	-0.9022	0.366951	5203	23	-0.0289	0.0022	A	0.3682	-0.02023
11:113370758	genus.Hungatella.id.11306	A/G	A	0.01109	0.02282	0.5318	0.595003	4279	23	-0.0289	0.0022	A	0.3682	0.01109
11:113370758	genus.Lachnoclostridium.id.11308	A/G	A	-0.00775	0.01118	-0.716	0.473868	18054	25	-0.0289	0.0022	A	0.3682	-0.00775
11:113370758	genus.LachnospiraceaeUCG001.id.11321	A/G	A	-0.00998	0.01471	-0.6969	0.485803	10258	25	-0.0289	0.0022	A	0.3682	-0.00998
11:113370758	genus.RuminococcaceaeUCG002.id.11360	A/G	A	0.00264	0.01144	0.2109	0.833043	17229	25	-0.0289	0.0022	A	0.3682	0.00264
11:113370758	genus.RuminococcaceaeUCG003.id.11361	A/G	A	0.0007	0.01246	0.0415	0.966977	14533	25	-0.0289	0.0022	A	0.3682	0.0007
11:113370758	genus.RuminococcaceaeUCG005.id.11363	A/G	A	0.00388	0.01177	0.3898	0.696832	16235	25	-0.0289	0.0022	A	0.3682	0.00388
11:113370758	genus.Sellimonas.id.14369	A/G	A	0.02013	0.02614	0.678	0.497772	3202	22	-0.0289	0.0022	A	0.3682	0.02013
11:113370758	genus.Subdoligranulum.id.2070	A/G	A	0.01214	0.01128	1.1288	0.259067	17723	25	-0.0289	0.0022	A	0.3682	0.01214
11:30892824	family.Ruminococcaceae.id.2050	A/G	A	0.00353	0.01056	0.3251	0.745181	18467	25	0.0172	0.0022	A	0.4171	0.00353
11:30892824	genus..Eubacteriumventriosumgroup.id.11341	A/G	A	-0.00279	0.01155	-0.2268	0.820424	15420	25	0.0172	0.0022	A	0.4171	-0.00279
11:30892824	genus..Ruminococcusgauvreauiigroup.id.11342	A/G	A	-0.0031	0.01234	-0.2416	0.80909	13514	25	0.0172	0.0022	A	0.4171	-0.0031
11:30892824	genus.Coprococcus3.id.11303	A/G	A	0.01425	0.01135	1.2599	0.207742	15967	25	0.0172	0.0022	A	0.4171	0.01425
11:30892824	genus.Eggerthella.id.819	A/G	A	-0.02846	0.01987	-1.4162	0.156717	5203	23	0.0172	0.0022	A	0.4171	-0.02846
11:30892824	genus.Hungatella.id.11306	A/G	A	-0.00299	0.02193	-0.1256	0.900049	4279	23	0.0172	0.0022	A	0.4171	-0.00299
11:30892824	genus.Lachnoclostridium.id.11308	A/G	A	-0.00566	0.01068	-0.5321	0.594587	18054	25	0.0172	0.0022	A	0.4171	-0.00566
11:30892824	genus.LachnospiraceaeUCG001.id.11321	A/G	A	-0.01073	0.01416	-0.7497	0.453375	10258	25	0.0172	0.0022	A	0.4171	-0.01073
11:30892824	genus.RuminococcaceaeUCG002.id.11360	A/G	A	0.0144	0.01093	1.3227	0.185968	17229	25	0.0172	0.0022	A	0.4171	0.0144
11:30892824	genus.RuminococcaceaeUCG003.id.11361	A/G	A	0.00384	0.0119	0.3294	0.741853	14533	25	0.0172	0.0022	A	0.4171	0.00384
11:30892824	genus.RuminococcaceaeUCG005.id.11363	A/G	A	0.01673	0.01125	1.4971	0.134393	16235	25	0.0172	0.0022	A	0.4171	0.01673
11:30892824	genus.Sellimonas.id.14369	A/G	A	-0.01244	0.02529	-0.504	0.614261	3202	22	0.0172	0.0022	A	0.4171	-0.01244
11:30892824	genus.Subdoligranulum.id.2070	A/G	A	-0.01538	0.01078	-1.4268	0.153638	17723	25	0.0172	0.0022	A	0.4171	-0.01538
11:57650796	family.Ruminococcaceae.id.2050	C/T	T	-0.01329	0.01151	-1.1067	0.26838	18457	25	0.0191	0.0024	T	0.3209	-0.01329
11:57650796	genus..Eubacteriumventriosumgroup.id.11341	C/T	T	-0.0038	0.01255	-0.4281	0.668506	15412	25	0.0191	0.0024	T	0.3209	-0.0038
11:57650796	genus..Ruminococcusgauvreauiigroup.id.11342	C/T	T	-0.00136	0.01342	-0.2267	0.820579	13506	25	0.0191	0.0024	T	0.3209	-0.00136
11:57650796	genus.Coprococcus3.id.11303	C/T	T	-0.00613	0.01235	-0.5254	0.599166	15960	25	0.0191	0.0024	T	0.3209	-0.00613
11:57650796	genus.Eggerthella.id.819	C/T	T	-0.00095	0.02141	-0.0993	0.920821	5203	23	0.0191	0.0024	T	0.3209	-0.00095
11:57650796	genus.Hungatella.id.11306	C/T	T	-0.0204	0.02388	-0.8632	0.388028	4274	23	0.0191	0.0024	T	0.3209	-0.0204
11:57650796	genus.Lachnoclostridium.id.11308	C/T	T	0.00373	0.01164	0.3163	0.751851	18045	25	0.0191	0.0024	T	0.3209	0.00373
11:57650796	genus.LachnospiraceaeUCG001.id.11321	C/T	T	0.00387	0.01528	0.2291	0.818869	10254	25	0.0191	0.0024	T	0.3209	0.00387
11:57650796	genus.RuminococcaceaeUCG002.id.11360	C/T	T	-0.00058	0.0119	0.0289	0.977024	17220	25	0.0191	0.0024	T	0.3209	-0.00058
11:57650796	genus.RuminococcaceaeUCG003.id.11361	C/T	T	0.03722	0.01298	2.7731	0.00555421	14525	25	0.0191	0.0024	T	0.3209	0.03722
11:57650796	genus.RuminococcaceaeUCG005.id.11363	C/T	T	0.00443	0.01222	0.4607	0.645086	16230	25	0.0191	0.0024	T	0.3209	0.00443
11:57650796	genus.Sellimonas.id.14369	C/T	T	-0.02176	0.02706	-0.804	0.421281	3201	22	0.0191	0.0024	T	0.3209	-0.02176
11:57650796	genus.Subdoligranulum.id.2070	C/T	T	0.0067	0.01174	0.6475	0.517373	17714	25	0.0191	0.0024	T	0.3209	0.0067
11:61471678	family.Ruminococcaceae.id.2050	C/T	T	0.01509	0.01401	0.9008	0.367695	17987	24	-0.0213	0.0028	T	0.1925	0.01509
11:61471678	genus..Eubacteriumventriosumgroup.id.11341	C/T	T	0.00734	0.01524	0.3845	0.700682	15045	24	-0.0213	0.0028	T	0.1925	0.00734
11:61471678	genus..Ruminococcusgauvreauiigroup.id.11342	C/T	T	0.01243	0.01626	0.8822	0.377669	13119	24	-0.0213	0.0028	T	0.1925	0.01243
11:61471678	genus.Coprococcus3.id.11303	C/T	T	0.02275	0.015	1.4811	0.138607	15605	24	-0.0213	0.0028	T	0.1925	0.02275
11:61471678	genus.Eggerthella.id.819	C/T	T	0.01668	0.02566	0.7265	0.467594	5203	23	-0.0213	0.0028	T	0.1925	0.01668
11:61471678	genus.Hungatella.id.11306	C/T	T	0.07119	0.02908	2.4464	0.0144371	4039	22	-0.0213	0.0028	T	0.1925	0.07119
11:61471678	genus.Lachnoclostridium.id.11308	C/T	T	0.00119	0.01415	0.0562	0.955182	17610	24	-0.0213	0.0028	T	0.1925	0.00119
11:61471678	genus.LachnospiraceaeUCG001.id.11321	C/T	T	-0.03345	0.01853	-1.8843	0.0595109	10069	24	-0.0213	0.0028	T	0.1925	-0.03345
11:61471678	genus.RuminococcaceaeUCG002.id.11360	C/T	T	0.02356	0.01448	1.6228	0.104675	16784	24	-0.0213	0.0028	T	0.1925	0.02356
11:61471678	genus.RuminococcaceaeUCG003.id.11361	C/T	T	0.00574	0.0158	0.2025	0.839604	14126	24	-0.0213	0.0028	T	0.1925	0.00574
11:61471678	genus.RuminococcaceaeUCG005.id.11363	C/T	T	0.0115	0.01483	0.8568	0.391666	15954	24	-0.0213	0.0028	T	0.1925	0.0115
11:61471678	genus.Sellimonas.id.14369	C/T	T	-0.0252	0.03274	-0.6931	0.488184	3143	21	-0.0213	0.0028	T	0.1925	-0.0252
11:61471678	genus.Subdoligranulum.id.2070	C/T	T	0.02012	0.01427	1.3889	0.164894	17298	24	-0.0213	0.0028	T	0.1925	0.02012
11:65314830	family.Ruminococcaceae.id.2050	A/T	T	0.00196	0.0132	0.1399	0.888818	18467	25	-0.0169	0.0027	A	0.7903	-0.00196
11:65314830	genus..Eubacteriumventriosumgroup.id.11341	A/T	T	-0.00055	0.01439	-0.0807	0.935601	15420	25	-0.0169	0.0027	A	0.7903	0.00055
11:65314830	genus..Ruminococcusgauvreauiigroup.id.11342	A/T	T	-0.01301	0.01536	-0.8692	0.384738	13514	25	-0.0169	0.0027	A	0.7903	0.01301
11:65314830	genus.Coprococcus3.id.11303	A/T	T	0.02835	0.01417	1.9998	0.0455219	15967	25	-0.0169	0.0027	A	0.7903	-0.02835
11:65314830	genus.Eggerthella.id.819	A/T	T	-0.03015	0.0245	-1.3021	0.192848	5203	23	-0.0169	0.0027	A	0.7903	0.03015
11:65314830	genus.Hungatella.id.11306	A/T	T	0.01376	0.02713	0.5107	0.609631	4279	23	-0.0169	0.0027	A	0.7903	-0.01376
11:65314830	genus.Lachnoclostridium.id.11308	A/T	T	0.01387	0.01334	1.0197	0.307918	18054	25	-0.0169	0.0027	A	0.7903	-0.01387
11:65314830	genus.LachnospiraceaeUCG001.id.11321	A/T	T	0.02351	0.01761	1.3857	0.165869	10258	25	-0.0169	0.0027	A	0.7903	-0.02351
11:65314830	genus.RuminococcaceaeUCG002.id.11360	A/T	T	-0.01097	0.01365	-0.8031	0.421859	17229	25	-0.0169	0.0027	A	0.7903	0.01097
11:65314830	genus.RuminococcaceaeUCG003.id.11361	A/T	T	-0.00784	0.01485	-0.5487	0.583143	14533	25	-0.0169	0.0027	A	0.7903	0.00784
11:65314830	genus.RuminococcaceaeUCG005.id.11363	A/T	T	-0.024	0.01405	-1.7	0.0890933	16235	25	-0.0169	0.0027	A	0.7903	0.024
11:65314830	genus.Sellimonas.id.14369	A/T	T	0.03567	0.03127	1.1617	0.245398	3202	22	-0.0169	0.0027	A	0.7903	-0.03567
11:65314830	genus.Subdoligranulum.id.2070	A/T	T	0.00616	0.01346	0.4522	0.651125	17723	25	-0.0169	0.0027	A	0.7903	-0.00616
11:70544937	family.Ruminococcaceae.id.2050	A/G	G	-0.00687	0.01054	-0.6077	0.54332	18462	25	-0.0166	0.0022	A	0.5417	0.00687
11:70544937	genus..Eubacteriumventriosumgroup.id.11341	A/G	G	-0.02283	0.01151	-1.9414	0.0522098	15416	25	-0.0166	0.0022	A	0.5417	0.02283
11:70544937	genus..Ruminococcusgauvreauiigroup.id.11342	A/G	G	-0.02119	0.0123	-1.7325	0.0831668	13510	25	-0.0166	0.0022	A	0.5417	0.02119
11:70544937	genus.Coprococcus3.id.11303	A/G	G	-0.01503	0.01132	-1.319	0.187169	15963	25	-0.0166	0.0022	A	0.5417	0.01503
11:70544937	genus.Eggerthella.id.819	A/G	G	0.00744	0.01976	0.3819	0.70261	5203	23	-0.0166	0.0022	A	0.5417	-0.00744
11:70544937	genus.Hungatella.id.11306	A/G	G	-0.00014	0.02189	-0.0156	0.987394	4276	23	-0.0166	0.0022	A	0.5417	0.00014
11:70544937	genus.Lachnoclostridium.id.11308	A/G	G	-0.01023	0.01066	-1.0034	0.315668	18049	25	-0.0166	0.0022	A	0.5417	0.01023
11:70544937	genus.LachnospiraceaeUCG001.id.11321	A/G	G	-0.00434	0.01408	-0.3227	0.746847	10256	25	-0.0166	0.0022	A	0.5417	0.00434
11:70544937	genus.RuminococcaceaeUCG002.id.11360	A/G	G	-0.02578	0.0109	-2.3144	0.0206348	17224	25	-0.0166	0.0022	A	0.5417	0.02578
11:70544937	genus.RuminococcaceaeUCG003.id.11361	A/G	G	0.00096	0.01188	0.0869	0.93083	14529	25	-0.0166	0.0022	A	0.5417	-0.00096
11:70544937	genus.RuminococcaceaeUCG005.id.11363	A/G	G	-0.01015	0.01122	-0.8759	0.38103	16232	25	-0.0166	0.0022	A	0.5417	0.01015
11:70544937	genus.Sellimonas.id.14369	A/G	G	0.00918	0.02508	0.3505	0.726039	3201	22	-0.0166	0.0022	A	0.5417	-0.00918
11:70544937	genus.Subdoligranulum.id.2070	A/G	G	-0.0113	0.01075	-1.0315	0.30226	17719	25	-0.0166	0.0022	A	0.5417	0.0113
11:88744425	family.Ruminococcaceae.id.2050	C/T	T	0.00017	0.01049	0.0078	0.993777	18468	25	0.0227	0.0022	T	0.4417	0.00017
11:88744425	genus..Eubacteriumventriosumgroup.id.11341	C/T	T	-0.00167	0.01148	-0.1536	0.877767	15421	25	0.0227	0.0022	T	0.4417	-0.00167
11:88744425	genus..Ruminococcusgauvreauiigroup.id.11342	C/T	T	0.0005	0.01226	0.0478	0.961876	13515	25	0.0227	0.0022	T	0.4417	0.0005
11:88744425	genus.Coprococcus3.id.11303	C/T	T	-0.00139	0.01128	-0.1289	0.897358	15968	25	0.0227	0.0022	T	0.4417	-0.00139
11:88744425	genus.Eggerthella.id.819	C/T	T	-0.02811	0.01973	-1.4435	0.148852	5203	23	0.0227	0.0022	T	0.4417	-0.02811
11:88744425	genus.Hungatella.id.11306	C/T	T	0.0068	0.02177	0.3115	0.755497	4279	23	0.0227	0.0022	T	0.4417	0.0068
11:88744425	genus.Lachnoclostridium.id.11308	C/T	T	-0.00425	0.01061	-0.4022	0.687537	18055	25	0.0227	0.0022	T	0.4417	-0.00425
11:88744425	genus.LachnospiraceaeUCG001.id.11321	C/T	T	-0.01486	0.01407	-1.0643	0.287148	10258	25	0.0227	0.0022	T	0.4417	-0.01486
11:88744425	genus.RuminococcaceaeUCG002.id.11360	C/T	T	-0.00949	0.01086	-0.8755	0.381248	17230	25	0.0227	0.0022	T	0.4417	-0.00949
11:88744425	genus.RuminococcaceaeUCG003.id.11361	C/T	T	0.00917	0.01183	0.7707	0.440944	14534	25	0.0227	0.0022	T	0.4417	0.00917
11:88744425	genus.RuminococcaceaeUCG005.id.11363	C/T	T	-0.0019	0.01119	-0.1682	0.866426	16236	25	0.0227	0.0022	T	0.4417	-0.0019
11:88744425	genus.Sellimonas.id.14369	C/T	T	-0.03859	0.02511	-1.5395	0.123658	3202	22	0.0227	0.0022	T	0.4417	-0.03859
11:88744425	genus.Subdoligranulum.id.2070	C/T	T	-0.00882	0.0107	-0.8295	0.406765	17724	25	0.0227	0.0022	T	0.4417	-0.00882
12:121205078	family.Ruminococcaceae.id.2050	A/G	A	0.002	0.01046	0.2375	0.812346	18468	25	0.0196	0.0021	A	0.4745	0.002
12:121205078	genus..Eubacteriumventriosumgroup.id.11341	A/G	A	0.00204	0.01144	0.1802	0.856996	15421	25	0.0196	0.0021	A	0.4745	0.00204
12:121205078	genus..Ruminococcusgauvreauiigroup.id.11342	A/G	A	0.03011	0.01221	2.471	0.0134811	13515	25	0.0196	0.0021	A	0.4745	0.03011
12:121205078	genus.Coprococcus3.id.11303	A/G	A	0.01001	0.01124	0.8569	0.391555	15968	25	0.0196	0.0021	A	0.4745	0.01001
12:121205078	genus.Eggerthella.id.819	A/G	A	0.00903	0.01969	0.4479	0.654298	5203	23	0.0196	0.0021	A	0.4745	0.00903
12:121205078	genus.Hungatella.id.11306	A/G	A	0.01607	0.02173	0.742	0.458209	4279	23	0.0196	0.0021	A	0.4745	0.01607
12:121205078	genus.Lachnoclostridium.id.11308	A/G	A	-0.01248	0.01057	-1.188	0.234755	18055	25	0.0196	0.0021	A	0.4745	-0.01248
12:121205078	genus.LachnospiraceaeUCG001.id.11321	A/G	A	0.01456	0.01401	1.0425	0.297226	10258	25	0.0196	0.0021	A	0.4745	0.01456
12:121205078	genus.RuminococcaceaeUCG002.id.11360	A/G	A	0.00856	0.01082	0.7943	0.427079	17230	25	0.0196	0.0021	A	0.4745	0.00856
12:121205078	genus.RuminococcaceaeUCG003.id.11361	A/G	A	0.00952	0.01178	0.8112	0.417366	14534	25	0.0196	0.0021	A	0.4745	0.00952
12:121205078	genus.RuminococcaceaeUCG005.id.11363	A/G	A	0.01177	0.01115	1.0883	0.276507	16236	25	0.0196	0.0021	A	0.4745	0.01177
12:121205078	genus.Sellimonas.id.14369	A/G	A	0.02902	0.02507	1.0813	0.279608	3202	22	0.0196	0.0021	A	0.4745	0.02902
12:121205078	genus.Subdoligranulum.id.2070	A/G	A	0.00619	0.01067	0.5865	0.557607	17724	25	0.0196	0.0021	A	0.4745	0.00619
12:23987925	family.Ruminococcaceae.id.2050	T/G	G	0.00253	0.01673	0.1749	0.861237	17522	23	0.0229	0.0034	T	0.8781	-0.00253
12:23987925	genus..Eubacteriumventriosumgroup.id.11341	T/G	G	-0.03093	0.01815	-1.6847	0.0920272	14618	23	0.0229	0.0034	T	0.8781	0.03093
12:23987925	genus..Ruminococcusgauvreauiigroup.id.11342	T/G	G	-0.03402	0.01937	-1.7711	0.0765274	12868	23	0.0229	0.0034	T	0.8781	0.03402
12:23987925	genus.Coprococcus3.id.11303	T/G	G	-0.02046	0.01791	-1.1241	0.260928	15178	23	0.0229	0.0034	T	0.8781	0.02046
12:23987925	genus.Eggerthella.id.819	T/G	G	0.0097	0.03128	0.3405	0.733555	4898	21	0.0229	0.0034	T	0.8781	-0.0097
12:23987925	genus.Hungatella.id.11306	T/G	G	-0.00456	0.0345	-0.2442	0.807076	4010	21	0.0229	0.0034	T	0.8781	0.00456
12:23987925	genus.Lachnoclostridium.id.11308	T/G	G	0.00353	0.01692	0.2615	0.793784	17113	23	0.0229	0.0034	T	0.8781	-0.00353
12:23987925	genus.LachnospiraceaeUCG001.id.11321	T/G	G	0.014	0.02203	0.5768	0.56421	9965	23	0.0229	0.0034	T	0.8781	-0.014
12:23987925	genus.RuminococcaceaeUCG002.id.11360	T/G	G	-8e-05	0.01726	-0.046	0.963151	16396	23	0.0229	0.0034	T	0.8781	8e-05
12:23987925	genus.RuminococcaceaeUCG003.id.11361	T/G	G	0.01675	0.01885	0.9467	0.343843	13752	23	0.0229	0.0034	T	0.8781	-0.01675
12:23987925	genus.RuminococcaceaeUCG005.id.11363	T/G	G	0.00151	0.01772	0.0911	0.927493	15502	23	0.0229	0.0034	T	0.8781	-0.00151
12:23987925	genus.Sellimonas.id.14369	T/G	G	-0.03381	0.03884	-0.8855	0.375833	3151	21	0.0229	0.0034	T	0.8781	0.03381
12:23987925	genus.Subdoligranulum.id.2070	T/G	G	-0.00676	0.01705	-0.3545	0.722889	16827	23	0.0229	0.0034	T	0.8781	0.00676
12:84465022	family.Ruminococcaceae.id.2050	G/T	G	-0.00468	0.0122	-0.3358	0.737022	18467	25	-0.0203	0.0025	T	0.7487	0.00468
12:84465022	genus..Eubacteriumventriosumgroup.id.11341	G/T	G	0.00041	0.01332	0.0133	0.989468	15420	25	-0.0203	0.0025	T	0.7487	-0.00041
12:84465022	genus..Ruminococcusgauvreauiigroup.id.11342	G/T	G	0.00318	0.01422	0.2908	0.771204	13514	25	-0.0203	0.0025	T	0.7487	-0.00318
12:84465022	genus.Coprococcus3.id.11303	G/T	G	0.00067	0.01311	0.0781	0.937828	15967	25	-0.0203	0.0025	T	0.7487	-0.00067
12:84465022	genus.Eggerthella.id.819	G/T	G	0.01882	0.02287	0.8462	0.397553	5203	23	-0.0203	0.0025	T	0.7487	-0.01882
12:84465022	genus.Hungatella.id.11306	G/T	G	-0.01212	0.02499	-0.4576	0.64724	4279	23	-0.0203	0.0025	T	0.7487	0.01212
12:84465022	genus.Lachnoclostridium.id.11308	G/T	G	0.01833	0.01234	1.4925	0.135594	18054	25	-0.0203	0.0025	T	0.7487	-0.01833
12:84465022	genus.LachnospiraceaeUCG001.id.11321	G/T	G	-0.00672	0.01632	-0.4618	0.644225	10258	25	-0.0203	0.0025	T	0.7487	0.00672
12:84465022	genus.RuminococcaceaeUCG002.id.11360	G/T	G	0.00831	0.01262	0.6197	0.535521	17229	25	-0.0203	0.0025	T	0.7487	-0.00831
12:84465022	genus.RuminococcaceaeUCG003.id.11361	G/T	G	0.02081	0.01374	1.5387	0.123902	14533	25	-0.0203	0.0025	T	0.7487	-0.02081
12:84465022	genus.RuminococcaceaeUCG005.id.11363	G/T	G	-0.00314	0.013	-0.2534	0.799805	16235	25	-0.0203	0.0025	T	0.7487	0.00314
12:84465022	genus.Sellimonas.id.14369	G/T	G	0.03704	0.02905	1.2316	0.218099	3202	22	-0.0203	0.0025	T	0.7487	-0.03704
12:84465022	genus.Subdoligranulum.id.2070	G/T	G	-0.00961	0.01245	-0.7189	0.472141	17723	25	-0.0203	0.0025	T	0.7487	0.00961
13:53647048	family.Ruminococcaceae.id.2050	C/A	A	0.0118	0.0108	1.0893	0.276066	18467	25	0.0231	0.0022	A	0.384	0.0118
13:53647048	genus..Eubacteriumventriosumgroup.id.11341	C/A	A	-0.00203	0.01182	-0.2362	0.813277	15420	25	0.0231	0.0022	A	0.384	-0.00203
13:53647048	genus..Ruminococcusgauvreauiigroup.id.11342	C/A	A	0.01117	0.01262	0.8619	0.388798	13514	25	0.0231	0.0022	A	0.384	0.01117
13:53647048	genus.Coprococcus3.id.11303	C/A	A	-0.00219	0.01161	-0.2776	0.781166	15967	25	0.0231	0.0022	A	0.384	-0.00219
13:53647048	genus.Eggerthella.id.819	C/A	A	0.00161	0.02038	0.0499	0.960282	5203	23	0.0231	0.0022	A	0.384	0.00161
13:53647048	genus.Hungatella.id.11306	C/A	A	0.02824	0.02244	1.2822	0.199843	4279	23	0.0231	0.0022	A	0.384	0.02824
13:53647048	genus.Lachnoclostridium.id.11308	C/A	A	-0.01346	0.01092	-1.24	0.214975	18054	25	0.0231	0.0022	A	0.384	-0.01346
13:53647048	genus.LachnospiraceaeUCG001.id.11321	C/A	A	-0.00077	0.01443	-0.0419	0.966499	10258	25	0.0231	0.0022	A	0.384	-0.00077
13:53647048	genus.RuminococcaceaeUCG002.id.11360	C/A	A	0.00809	0.01118	0.6815	0.495618	17229	25	0.0231	0.0022	A	0.384	0.00809
13:53647048	genus.RuminococcaceaeUCG003.id.11361	C/A	A	-0.00881	0.01218	-0.7745	0.438576	14533	25	0.0231	0.0022	A	0.384	-0.00881
13:53647048	genus.RuminococcaceaeUCG005.id.11363	C/A	A	0.0243	0.0115	2.016	0.0438	16235	25	0.0231	0.0022	A	0.384	0.0243
13:53647048	genus.Sellimonas.id.14369	C/A	A	0.03959	0.02569	1.5174	0.129166	3202	22	0.0231	0.0022	A	0.384	0.03959
13:53647048	genus.Subdoligranulum.id.2070	C/A	A	0.01159	0.01102	1.0665	0.286243	17723	25	0.0231	0.0022	A	0.384	0.01159
13:66941792	family.Ruminococcaceae.id.2050	A/G	G	-0.01458	0.01046	-1.4065	0.159546	18468	25	0.0243	0.0022	A	0.4874	0.01458
13:66941792	genus..Eubacteriumventriosumgroup.id.11341	A/G	G	-0.00379	0.01143	-0.3259	0.744424	15421	25	0.0243	0.0022	A	0.4874	0.00379
13:66941792	genus..Ruminococcusgauvreauiigroup.id.11342	A/G	G	-0.00806	0.01221	-0.6742	0.500057	13515	25	0.0243	0.0022	A	0.4874	0.00806
13:66941792	genus.Coprococcus3.id.11303	A/G	G	-0.00367	0.01124	-0.3305	0.740947	15968	25	0.0243	0.0022	A	0.4874	0.00367
13:66941792	genus.Eggerthella.id.819	A/G	G	0.00445	0.01964	0.2161	0.828988	5203	23	0.0243	0.0022	A	0.4874	-0.00445
13:66941792	genus.Hungatella.id.11306	A/G	G	-0.01394	0.02163	-0.6405	0.521783	4279	23	0.0243	0.0022	A	0.4874	0.01394
13:66941792	genus.Lachnoclostridium.id.11308	A/G	G	0.00162	0.01057	0.1773	0.859351	18055	25	0.0243	0.0022	A	0.4874	-0.00162
13:66941792	genus.LachnospiraceaeUCG001.id.11321	A/G	G	-3e-05	0.014	-0.0069	0.994415	10258	25	0.0243	0.0022	A	0.4874	3e-05
13:66941792	genus.RuminococcaceaeUCG002.id.11360	A/G	G	-0.00117	0.01082	-0.142	0.88708	17230	25	0.0243	0.0022	A	0.4874	0.00117
13:66941792	genus.RuminococcaceaeUCG003.id.11361	A/G	G	0.005	0.01179	0.4164	0.677264	14534	25	0.0243	0.0022	A	0.4874	-0.005
13:66941792	genus.RuminococcaceaeUCG005.id.11363	A/G	G	-0.00323	0.01114	-0.3217	0.747604	16236	25	0.0243	0.0022	A	0.4874	0.00323
13:66941792	genus.Sellimonas.id.14369	A/G	G	0.01046	0.0249	0.4107	0.681366	3202	22	0.0243	0.0022	A	0.4874	-0.01046
13:66941792	genus.Subdoligranulum.id.2070	A/G	G	0.01474	0.01067	1.3569	0.174845	17724	25	0.0243	0.0022	A	0.4874	-0.01474
13:99115041	family.Ruminococcaceae.id.2050	T/C	T	-0.01127	0.01084	-1.0307	0.302635	18468	25	0.0209	0.0023	T	0.3732	-0.01127
13:99115041	genus..Eubacteriumventriosumgroup.id.11341	T/C	T	0.00717	0.01181	0.5926	0.553583	15421	25	0.0209	0.0023	T	0.3732	0.00717
13:99115041	genus..Ruminococcusgauvreauiigroup.id.11342	T/C	T	-9e-05	0.01263	0.0271	0.97846	13515	25	0.0209	0.0023	T	0.3732	-9e-05
13:99115041	genus.Coprococcus3.id.11303	T/C	T	0.00652	0.01163	0.5463	0.584928	15968	25	0.0209	0.0023	T	0.3732	0.00652
13:99115041	genus.Eggerthella.id.819	T/C	T	0.00885	0.02031	0.4409	0.659358	5203	23	0.0209	0.0023	T	0.3732	0.00885
13:99115041	genus.Hungatella.id.11306	T/C	T	-0.0021	0.02241	-0.0581	0.953589	4279	23	0.0209	0.0023	T	0.3732	-0.0021
13:99115041	genus.Lachnoclostridium.id.11308	T/C	T	-0.019	0.01096	-1.7083	0.0875622	18055	25	0.0209	0.0023	T	0.3732	-0.019
13:99115041	genus.LachnospiraceaeUCG001.id.11321	T/C	T	-0.01293	0.0145	-0.9562	0.338971	10258	25	0.0209	0.0023	T	0.3732	-0.01293
13:99115041	genus.RuminococcaceaeUCG002.id.11360	T/C	T	0.00347	0.01121	0.3215	0.747907	17230	25	0.0209	0.0023	T	0.3732	0.00347
13:99115041	genus.RuminococcaceaeUCG003.id.11361	T/C	T	-0.00973	0.0122	-0.7663	0.443438	14534	25	0.0209	0.0023	T	0.3732	-0.00973
13:99115041	genus.RuminococcaceaeUCG005.id.11363	T/C	T	0.0052	0.01154	0.5026	0.615386	16236	25	0.0209	0.0023	T	0.3732	0.0052
13:99115041	genus.Sellimonas.id.14369	T/C	T	-0.01082	0.0259	-0.3959	0.692105	3202	22	0.0209	0.0023	T	0.3732	-0.01082
13:99115041	genus.Subdoligranulum.id.2070	T/C	T	0.00847	0.01105	0.7057	0.480437	17724	25	0.0209	0.0023	T	0.3732	0.00847
14:104017953	family.Ruminococcaceae.id.2050	A/G	A	0.00622	0.01055	0.5828	0.560163	17987	24	-0.0206	0.0021	A	0.4869	0.00622
14:104017953	genus..Eubacteriumventriosumgroup.id.11341	A/G	A	-0.00537	0.01154	-0.4605	0.645086	15045	24	-0.0206	0.0021	A	0.4869	-0.00537
14:104017953	genus..Ruminococcusgauvreauiigroup.id.11342	A/G	A	-0.00468	0.01236	-0.3752	0.707512	13119	24	-0.0206	0.0021	A	0.4869	-0.00468
14:104017953	genus.Coprococcus3.id.11303	A/G	A	0.01221	0.01133	1.0852	0.277922	15605	24	-0.0206	0.0021	A	0.4869	0.01221
14:104017953	genus.Eggerthella.id.819	A/G	A	-0.01251	0.0196	-0.6257	0.531446	5203	23	-0.0206	0.0021	A	0.4869	-0.01251
14:104017953	genus.Hungatella.id.11306	A/G	A	0.00069	0.02221	0.0232	0.98165	4039	22	-0.0206	0.0021	A	0.4869	0.00069
14:104017953	genus.Lachnoclostridium.id.11308	A/G	A	-0.0144	0.01066	-1.3446	0.17869	17610	24	-0.0206	0.0021	A	0.4869	-0.0144
14:104017953	genus.LachnospiraceaeUCG001.id.11321	A/G	A	0.02481	0.0141	1.757	0.0789519	10069	24	-0.0206	0.0021	A	0.4869	0.02481
14:104017953	genus.RuminococcaceaeUCG002.id.11360	A/G	A	0.00118	0.01092	0.0955	0.923997	16784	24	-0.0206	0.0021	A	0.4869	0.00118
14:104017953	genus.RuminococcaceaeUCG003.id.11361	A/G	A	-0.00296	0.01191	-0.2471	0.804753	14126	24	-0.0206	0.0021	A	0.4869	-0.00296
14:104017953	genus.RuminococcaceaeUCG005.id.11363	A/G	A	-0.00098	0.0112	-0.0954	0.923838	15954	24	-0.0206	0.0021	A	0.4869	-0.00098
14:104017953	genus.Sellimonas.id.14369	A/G	A	-0.00037	0.02518	0.0067	0.994734	3143	21	-0.0206	0.0021	A	0.4869	-0.00037
14:104017953	genus.Subdoligranulum.id.2070	A/G	A	-0.00556	0.01076	-0.5204	0.602645	17298	24	-0.0206	0.0021	A	0.4869	-0.00556
14:42074726	family.Ruminococcaceae.id.2050	A/G	G	0.01398	0.01067	1.3391	0.180571	17656	24	-0.0249	0.0021	A	0.5083	-0.01398
14:42074726	genus..Eubacteriumventriosumgroup.id.11341	A/G	G	-0.01871	0.01168	-1.5764	0.114888	14711	24	-0.0249	0.0021	A	0.5083	0.01871
14:42074726	genus..Ruminococcusgauvreauiigroup.id.11342	A/G	G	0.0034	0.01244	0.2971	0.766467	12971	24	-0.0249	0.0021	A	0.5083	-0.0034
14:42074726	genus.Coprococcus3.id.11303	A/G	G	0.00207	0.01146	0.1988	0.842419	15287	24	-0.0249	0.0021	A	0.5083	-0.00207
14:42074726	genus.Eggerthella.id.819	A/G	G	-0.0055	0.0201	-0.2487	0.803515	4962	22	-0.0249	0.0021	A	0.5083	0.0055
14:42074726	genus.Hungatella.id.11306	A/G	G	-0.01042	0.02215	-0.4682	0.639499	4079	22	-0.0249	0.0021	A	0.5083	0.01042
14:42074726	genus.Lachnoclostridium.id.11308	A/G	G	0.00493	0.01079	0.4777	0.632935	17245	24	-0.0249	0.0021	A	0.5083	-0.00493
14:42074726	genus.LachnospiraceaeUCG001.id.11321	A/G	G	0.02133	0.01414	1.5223	0.127959	10026	24	-0.0249	0.0021	A	0.5083	-0.02133
14:42074726	genus.RuminococcaceaeUCG002.id.11360	A/G	G	0.0116	0.01103	1.0537	0.292066	16508	24	-0.0249	0.0021	A	0.5083	-0.0116
14:42074726	genus.RuminococcaceaeUCG003.id.11361	A/G	G	0.01267	0.01204	1.0677	0.285701	13858	24	-0.0249	0.0021	A	0.5083	-0.01267
14:42074726	genus.RuminococcaceaeUCG005.id.11363	A/G	G	0.01059	0.01135	0.9447	0.344863	15606	24	-0.0249	0.0021	A	0.5083	-0.01059
14:42074726	genus.Sellimonas.id.14369	A/G	G	-0.02047	0.02498	-0.7982	0.424754	3202	22	-0.0249	0.0021	A	0.5083	0.02047
14:42074726	genus.Subdoligranulum.id.2070	A/G	G	-0.00632	0.01089	-0.5777	0.563399	16952	24	-0.0249	0.0021	A	0.5083	0.00632
14:60141822	family.Ruminococcaceae.id.2050	T/G	G	-0.01607	0.01191	-1.4719	0.141021	18467	25	-0.0169	0.0025	T	0.7436	0.01607
14:60141822	genus..Eubacteriumventriosumgroup.id.11341	T/G	G	0.00254	0.0131	0.206	0.836791	15420	25	-0.0169	0.0025	T	0.7436	-0.00254
14:60141822	genus..Ruminococcusgauvreauiigroup.id.11342	T/G	G	0.00437	0.01395	0.4141	0.678874	13514	25	-0.0169	0.0025	T	0.7436	-0.00437
14:60141822	genus.Coprococcus3.id.11303	T/G	G	0.00783	0.01284	0.6985	0.484927	15967	25	-0.0169	0.0025	T	0.7436	-0.00783
14:60141822	genus.Eggerthella.id.819	T/G	G	-0.01687	0.0225	-0.6411	0.521393	5203	23	-0.0169	0.0025	T	0.7436	0.01687
14:60141822	genus.Hungatella.id.11306	T/G	G	-0.01918	0.02453	-0.7399	0.4593	4279	23	-0.0169	0.0025	T	0.7436	0.01918
14:60141822	genus.Lachnoclostridium.id.11308	T/G	G	0.02465	0.01205	2.0254	0.0428468	18054	25	-0.0169	0.0025	T	0.7436	-0.02465
14:60141822	genus.LachnospiraceaeUCG001.id.11321	T/G	G	0.002	0.01607	0.147	0.88329	10258	25	-0.0169	0.0025	T	0.7436	-0.002
14:60141822	genus.RuminococcaceaeUCG002.id.11360	T/G	G	-0.02144	0.01235	-1.759	0.0785435	17229	25	-0.0169	0.0025	T	0.7436	0.02144
14:60141822	genus.RuminococcaceaeUCG003.id.11361	T/G	G	-0.01036	0.01343	-0.7257	0.467961	14533	25	-0.0169	0.0025	T	0.7436	0.01036
14:60141822	genus.RuminococcaceaeUCG005.id.11363	T/G	G	0.00775	0.01275	0.5133	0.607811	16235	25	-0.0169	0.0025	T	0.7436	-0.00775
14:60141822	genus.Sellimonas.id.14369	T/G	G	-0.0065	0.02883	-0.2598	0.794864	3202	22	-0.0169	0.0025	T	0.7436	0.0065
14:60141822	genus.Subdoligranulum.id.2070	T/G	G	-0.00795	0.01217	-0.6949	0.487055	17723	25	-0.0169	0.0025	T	0.7436	0.00795
14:64697037	family.Ruminococcaceae.id.2050	T/C	T	0.00349	0.01053	0.3324	0.739738	18468	25	-0.0152	0.0022	T	0.4357	0.00349
14:64697037	genus..Eubacteriumventriosumgroup.id.11341	T/C	T	0.00956	0.01152	0.8354	0.403493	15421	25	-0.0152	0.0022	T	0.4357	0.00956
14:64697037	genus..Ruminococcusgauvreauiigroup.id.11342	T/C	T	-0.0058	0.0123	-0.4641	0.642504	13515	25	-0.0152	0.0022	T	0.4357	-0.0058
14:64697037	genus.Coprococcus3.id.11303	T/C	T	-0.00189	0.01132	-0.1978	0.843202	15968	25	-0.0152	0.0022	T	0.4357	-0.00189
14:64697037	genus.Eggerthella.id.819	T/C	T	-0.04627	0.01983	-2.307	0.0210437	5203	23	-0.0152	0.0022	T	0.4357	-0.04627
14:64697037	genus.Hungatella.id.11306	T/C	T	-0.05187	0.0219	-2.3487	0.018834	4279	23	-0.0152	0.0022	T	0.4357	-0.05187
14:64697037	genus.Lachnoclostridium.id.11308	T/C	T	-0.0192	0.01065	-1.817	0.0691865	18055	25	-0.0152	0.0022	T	0.4357	-0.0192
14:64697037	genus.LachnospiraceaeUCG001.id.11321	T/C	T	-0.00536	0.01411	-0.3873	0.69846	10258	25	-0.0152	0.0022	T	0.4357	-0.00536
14:64697037	genus.RuminococcaceaeUCG002.id.11360	T/C	T	0.01275	0.0109	1.1917	0.233418	17230	25	-0.0152	0.0022	T	0.4357	0.01275
14:64697037	genus.RuminococcaceaeUCG003.id.11361	T/C	T	0.02423	0.01186	2.0365	0.0417102	14534	25	-0.0152	0.0022	T	0.4357	0.02423
14:64697037	genus.RuminococcaceaeUCG005.id.11363	T/C	T	-0.0016	0.01122	-0.1431	0.886132	16236	25	-0.0152	0.0022	T	0.4357	-0.0016
14:64697037	genus.Sellimonas.id.14369	T/C	T	-0.02985	0.02516	-1.1085	0.267603	3202	22	-0.0152	0.0022	T	0.4357	-0.02985
14:64697037	genus.Subdoligranulum.id.2070	T/C	T	-0.00774	0.01075	-0.7307	0.464901	17724	25	-0.0152	0.0022	T	0.4357	-0.00774
14:75130235	family.Ruminococcaceae.id.2050	T/G	T	-0.0039	0.01044	-0.4321	0.665596	18468	25	-0.0226	0.0022	T	0.4792	-0.0039
14:75130235	genus..Eubacteriumventriosumgroup.id.11341	T/G	T	0.00382	0.01142	0.3356	0.737173	15421	25	-0.0226	0.0022	T	0.4792	0.00382
14:75130235	genus..Ruminococcusgauvreauiigroup.id.11342	T/G	T	-0.01505	0.0122	-1.1968	0.231385	13515	25	-0.0226	0.0022	T	0.4792	-0.01505
14:75130235	genus.Coprococcus3.id.11303	T/G	T	-0.01218	0.01123	-1.0366	0.299922	15968	25	-0.0226	0.0022	T	0.4792	-0.01218
14:75130235	genus.Eggerthella.id.819	T/G	T	0.02358	0.01969	1.2347	0.216979	5203	23	-0.0226	0.0022	T	0.4792	0.02358
14:75130235	genus.Hungatella.id.11306	T/G	T	-0.01219	0.02173	-0.5752	0.565021	4279	23	-0.0226	0.0022	T	0.4792	-0.01219
14:75130235	genus.Lachnoclostridium.id.11308	T/G	T	-0.03041	0.01056	-2.8403	0.0045057	18055	25	-0.0226	0.0022	T	0.4792	-0.03041
14:75130235	genus.LachnospiraceaeUCG001.id.11321	T/G	T	-0.01165	0.014	-0.8034	0.421628	10258	25	-0.0226	0.0022	T	0.4792	-0.01165
14:75130235	genus.RuminococcaceaeUCG002.id.11360	T/G	T	0.00565	0.01081	0.4665	0.640929	17230	25	-0.0226	0.0022	T	0.4792	0.00565
14:75130235	genus.RuminococcaceaeUCG003.id.11361	T/G	T	0.00096	0.01177	0.0213	0.983086	14534	25	-0.0226	0.0022	T	0.4792	0.00096
14:75130235	genus.RuminococcaceaeUCG005.id.11363	T/G	T	0.01208	0.01113	1.0124	0.311347	16236	25	-0.0226	0.0022	T	0.4792	0.01208
14:75130235	genus.Sellimonas.id.14369	T/G	T	-0.03039	0.02508	-1.1417	0.253537	3202	22	-0.0226	0.0022	T	0.4792	-0.03039
14:75130235	genus.Subdoligranulum.id.2070	T/G	T	-0.00394	0.01066	-0.3801	0.703797	17724	25	-0.0226	0.0022	T	0.4792	-0.00394
15:37643831	family.Ruminococcaceae.id.2050	C/T	C	-0.00626	0.01052	-0.5906	0.554654	18464	25	-0.0192	0.0022	T	0.5556	0.00626
15:37643831	genus..Eubacteriumventriosumgroup.id.11341	C/T	C	0.00437	0.01151	0.3651	0.715111	15418	25	-0.0192	0.0022	T	0.5556	-0.00437
15:37643831	genus..Ruminococcusgauvreauiigroup.id.11342	C/T	C	-0.00524	0.0123	-0.4065	0.684302	13512	25	-0.0192	0.0022	T	0.5556	0.00524
15:37643831	genus.Coprococcus3.id.11303	C/T	C	0.00312	0.01131	0.2974	0.766314	15965	25	-0.0192	0.0022	T	0.5556	-0.00312
15:37643831	genus.Eggerthella.id.819	C/T	C	0.00263	0.01978	0.1478	0.882501	5203	23	-0.0192	0.0022	T	0.5556	-0.00263
15:37643831	genus.Hungatella.id.11306	C/T	C	0.01708	0.02187	0.7882	0.430697	4277	23	-0.0192	0.0022	T	0.5556	-0.01708
15:37643831	genus.Lachnoclostridium.id.11308	C/T	C	0.02208	0.01064	2.0832	0.0372512	18051	25	-0.0192	0.0022	T	0.5556	-0.02208
15:37643831	genus.LachnospiraceaeUCG001.id.11321	C/T	C	-0.01615	0.0141	-1.1418	0.253537	10256	25	-0.0192	0.0022	T	0.5556	0.01615
15:37643831	genus.RuminococcaceaeUCG002.id.11360	C/T	C	-0.01494	0.01089	-1.3567	0.174845	17226	25	-0.0192	0.0022	T	0.5556	0.01494
15:37643831	genus.RuminococcaceaeUCG003.id.11361	C/T	C	0.00605	0.01186	0.5202	0.603064	14531	25	-0.0192	0.0022	T	0.5556	-0.00605
15:37643831	genus.RuminococcaceaeUCG005.id.11363	C/T	C	-0.0033	0.01121	-0.3049	0.760366	16234	25	-0.0192	0.0022	T	0.5556	0.0033
15:37643831	genus.Sellimonas.id.14369	C/T	C	0.01788	0.02522	0.7021	0.482679	3202	22	-0.0192	0.0022	T	0.5556	-0.01788
15:37643831	genus.Subdoligranulum.id.2070	C/T	C	0.00143	0.01074	0.1373	0.890873	17720	25	-0.0192	0.0022	T	0.5556	-0.00143
15:47684936	family.Ruminococcaceae.id.2050	T/C	C	0.00022	0.01293	0.0466	0.962832	17653	24	-0.0193	0.0027	T	0.7887	-0.00022
15:47684936	genus..Eubacteriumventriosumgroup.id.11341	T/C	C	0.01832	0.01415	1.2815	0.200053	14709	24	-0.0193	0.0027	T	0.7887	-0.01832
15:47684936	genus..Ruminococcusgauvreauiigroup.id.11342	T/C	C	0.04039	0.01506	2.6846	0.00726167	12969	24	-0.0193	0.0027	T	0.7887	-0.04039
15:47684936	genus.Coprococcus3.id.11303	T/C	C	-0.00017	0.01388	-0.0211	0.983086	15285	24	-0.0193	0.0027	T	0.7887	0.00017
15:47684936	genus.Eggerthella.id.819	T/C	C	0.01542	0.02433	0.6325	0.527126	4962	22	-0.0193	0.0027	T	0.7887	-0.01542
15:47684936	genus.Hungatella.id.11306	T/C	C	0.0074	0.02683	0.2291	0.818869	4077	22	-0.0193	0.0027	T	0.7887	-0.0074
15:47684936	genus.Lachnoclostridium.id.11308	T/C	C	0.00909	0.01308	0.695	0.487055	17242	24	-0.0193	0.0027	T	0.7887	-0.00909
15:47684936	genus.LachnospiraceaeUCG001.id.11321	T/C	C	0.01342	0.01713	0.7707	0.440944	10024	24	-0.0193	0.0027	T	0.7887	-0.01342
15:47684936	genus.RuminococcaceaeUCG002.id.11360	T/C	C	-0.00761	0.01337	-0.5748	0.565427	16505	24	-0.0193	0.0027	T	0.7887	0.00761
15:47684936	genus.RuminococcaceaeUCG003.id.11361	T/C	C	0.01676	0.0146	1.153	0.24891	13856	24	-0.0193	0.0027	T	0.7887	-0.01676
15:47684936	genus.RuminococcaceaeUCG005.id.11363	T/C	C	-0.00959	0.01375	-0.7002	0.483802	15605	24	-0.0193	0.0027	T	0.7887	0.00959
15:47684936	genus.Sellimonas.id.14369	T/C	C	0.01719	0.03021	0.5262	0.598749	3202	22	-0.0193	0.0027	T	0.7887	-0.01719
15:47684936	genus.Subdoligranulum.id.2070	T/C	C	0.0076	0.0132	0.6081	0.543187	16949	24	-0.0193	0.0027	T	0.7887	-0.0076
16:13066833	family.Ruminococcaceae.id.2050	C/T	T	-0.00535	0.01211	-0.2902	0.77151	18457	25	0.027	0.0025	T	0.2551	-0.00535
16:13066833	genus..Eubacteriumventriosumgroup.id.11341	C/T	T	0.00895	0.0132	0.6673	0.504644	15412	25	0.027	0.0025	T	0.2551	0.00895
16:13066833	genus..Ruminococcusgauvreauiigroup.id.11342	C/T	T	-0.01013	0.0141	-0.6717	0.501711	13506	25	0.027	0.0025	T	0.2551	-0.01013
16:13066833	genus.Coprococcus3.id.11303	C/T	T	0.00933	0.01298	0.5782	0.563129	15960	25	0.027	0.0025	T	0.2551	0.00933
16:13066833	genus.Eggerthella.id.819	C/T	T	-0.00602	0.0227	-0.3568	0.721092	5203	23	0.027	0.0025	T	0.2551	-0.00602
16:13066833	genus.Hungatella.id.11306	C/T	T	-0.04774	0.02522	-1.817	0.0691865	4274	23	0.027	0.0025	T	0.2551	-0.04774
16:13066833	genus.Lachnoclostridium.id.11308	C/T	T	-0.00124	0.01225	-0.0959	0.923521	18045	25	0.027	0.0025	T	0.2551	-0.00124
16:13066833	genus.LachnospiraceaeUCG001.id.11321	C/T	T	0.00773	0.01604	0.6383	0.523343	10254	25	0.027	0.0025	T	0.2551	0.00773
16:13066833	genus.RuminococcaceaeUCG002.id.11360	C/T	T	-0.00511	0.01252	-0.3794	0.704391	17220	25	0.027	0.0025	T	0.2551	-0.00511
16:13066833	genus.RuminococcaceaeUCG003.id.11361	C/T	T	0.01307	0.01366	0.9446	0.344863	14525	25	0.027	0.0025	T	0.2551	0.01307
16:13066833	genus.RuminococcaceaeUCG005.id.11363	C/T	T	-0.00996	0.01285	-0.6475	0.517244	16230	25	0.027	0.0025	T	0.2551	-0.00996
16:13066833	genus.Sellimonas.id.14369	C/T	T	-0.01379	0.02845	-0.4646	0.642218	3201	22	0.027	0.0025	T	0.2551	-0.01379
16:13066833	genus.Subdoligranulum.id.2070	C/T	T	0.0091	0.01235	0.7106	0.477456	17714	25	0.027	0.0025	T	0.2551	0.0091
16:13755530	family.Ruminococcaceae.id.2050	A/G	G	0.03335	0.0117	2.906	0.00366316	18468	25	-0.0171	0.0024	A	0.7264	-0.03335
16:13755530	genus..Eubacteriumventriosumgroup.id.11341	A/G	G	0.03048	0.0128	2.4269	0.0152327	15421	25	-0.0171	0.0024	A	0.7264	-0.03048
16:13755530	genus..Ruminococcusgauvreauiigroup.id.11342	A/G	G	-0.01901	0.01365	-1.3586	0.174273	13515	25	-0.0171	0.0024	A	0.7264	0.01901
16:13755530	genus.Coprococcus3.id.11303	A/G	G	-0.01064	0.01258	-0.7825	0.433862	15968	25	-0.0171	0.0024	A	0.7264	0.01064
16:13755530	genus.Eggerthella.id.819	A/G	G	0.02948	0.02198	1.3218	0.186301	5203	23	-0.0171	0.0024	A	0.7264	-0.02948
16:13755530	genus.Hungatella.id.11306	A/G	G	0.01453	0.02409	0.5942	0.552512	4279	23	-0.0171	0.0024	A	0.7264	-0.01453
16:13755530	genus.Lachnoclostridium.id.11308	A/G	G	0.00012	0.01184	-0.0358	0.971282	18055	25	-0.0171	0.0024	A	0.7264	-0.00012
16:13755530	genus.LachnospiraceaeUCG001.id.11321	A/G	G	0.01188	0.01561	0.7584	0.448212	10258	25	-0.0171	0.0024	A	0.7264	-0.01188
16:13755530	genus.RuminococcaceaeUCG002.id.11360	A/G	G	-0.00147	0.01211	-0.1157	0.907811	17230	25	-0.0171	0.0024	A	0.7264	0.00147
16:13755530	genus.RuminococcaceaeUCG003.id.11361	A/G	G	0.00821	0.01319	0.6661	0.505411	14534	25	-0.0171	0.0024	A	0.7264	-0.00821
16:13755530	genus.RuminococcaceaeUCG005.id.11363	A/G	G	0.01813	0.01247	1.4687	0.141941	16236	25	-0.0171	0.0024	A	0.7264	-0.01813
16:13755530	genus.Sellimonas.id.14369	A/G	G	0.00633	0.02776	0.2331	0.815761	3202	22	-0.0171	0.0024	A	0.7264	-0.00633
16:13755530	genus.Subdoligranulum.id.2070	A/G	G	0.02179	0.01194	1.8255	0.0679407	17724	25	-0.0171	0.0024	A	0.7264	-0.02179
16:21639710	family.Ruminococcaceae.id.2050	C/A	C	-0.00413	0.01059	-0.3955	0.6924	18354	24	-0.0237	0.0023	A	0.5625	0.00413
16:21639710	genus..Eubacteriumventriosumgroup.id.11341	C/A	C	-0.01079	0.01156	-0.9478	0.343231	15343	24	-0.0237	0.0023	A	0.5625	0.01079
16:21639710	genus..Ruminococcusgauvreauiigroup.id.11342	C/A	C	-0.01269	0.01236	-1.0351	0.300576	13428	24	-0.0237	0.0023	A	0.5625	0.01269
16:21639710	genus.Coprococcus3.id.11303	C/A	C	-0.0074	0.01138	-0.6633	0.507074	15874	24	-0.0237	0.0023	A	0.5625	0.0074
16:21639710	genus.Eggerthella.id.819	C/A	C	0.03599	0.01988	1.7929	0.0730049	5139	22	-0.0237	0.0023	A	0.5625	-0.03599
16:21639710	genus.Hungatella.id.11306	C/A	C	-0.0203	0.02196	-0.9101	0.362717	4220	22	-0.0237	0.0023	A	0.5625	0.0203
16:21639710	genus.Lachnoclostridium.id.11308	C/A	C	-0.01459	0.0107	-1.3639	0.172568	17941	24	-0.0237	0.0023	A	0.5625	0.01459
16:21639710	genus.LachnospiraceaeUCG001.id.11321	C/A	C	-0.00827	0.01415	-0.5677	0.570171	10205	24	-0.0237	0.0023	A	0.5625	0.00827
16:21639710	genus.RuminococcaceaeUCG002.id.11360	C/A	C	-0.01277	0.01095	-1.1651	0.243938	17136	24	-0.0237	0.0023	A	0.5625	0.01277
16:21639710	genus.RuminococcaceaeUCG003.id.11361	C/A	C	-0.01299	0.01193	-1.0757	0.282017	14445	24	-0.0237	0.0023	A	0.5625	0.01299
16:21639710	genus.RuminococcaceaeUCG005.id.11363	C/A	C	0.00208	0.01128	0.1684	0.866269	16143	24	-0.0237	0.0023	A	0.5625	-0.00208
16:21639710	genus.Sellimonas.id.14369	C/A	C	-0.03012	0.02531	-1.1977	0.230995	3154	21	-0.0237	0.0023	A	0.5625	0.03012
16:21639710	genus.Subdoligranulum.id.2070	C/A	C	-0.01833	0.0108	-1.7074	0.0877106	17617	24	-0.0237	0.0023	A	0.5625	0.01833
16:6315880	family.Ruminococcaceae.id.2050	A/G	G	0.00524	0.01099	0.5249	0.599722	18455	25	-0.0206	0.0023	A	0.6679	-0.00524
16:6315880	genus..Eubacteriumventriosumgroup.id.11341	A/G	G	-0.00275	0.01204	-0.2423	0.80847	15411	25	-0.0206	0.0023	A	0.6679	0.00275
16:6315880	genus..Ruminococcusgauvreauiigroup.id.11342	A/G	G	-0.00571	0.01284	-0.4783	0.632366	13504	25	-0.0206	0.0023	A	0.6679	0.00571
16:6315880	genus.Coprococcus3.id.11303	A/G	G	0.00891	0.01182	0.7571	0.44905	15958	25	-0.0206	0.0023	A	0.6679	-0.00891
16:6315880	genus.Eggerthella.id.819	A/G	G	0.01792	0.02076	0.8608	0.389348	5203	23	-0.0206	0.0023	A	0.6679	-0.01792
16:6315880	genus.Hungatella.id.11306	A/G	G	0.01446	0.02276	0.6142	0.539215	4273	23	-0.0206	0.0023	A	0.6679	-0.01446
16:6315880	genus.Lachnoclostridium.id.11308	A/G	G	0.00373	0.01112	0.3493	0.726939	18043	25	-0.0206	0.0023	A	0.6679	-0.00373
16:6315880	genus.LachnospiraceaeUCG001.id.11321	A/G	G	0.02445	0.01475	1.6382	0.10138	10253	25	-0.0206	0.0023	A	0.6679	-0.02445
16:6315880	genus.RuminococcaceaeUCG002.id.11360	A/G	G	0.01986	0.01138	1.753	0.079602	17218	25	-0.0206	0.0023	A	0.6679	-0.01986
16:6315880	genus.RuminococcaceaeUCG003.id.11361	A/G	G	0.02373	0.01239	1.8633	0.0624341	14523	25	-0.0206	0.0023	A	0.6679	-0.02373
16:6315880	genus.RuminococcaceaeUCG005.id.11363	A/G	G	0.01357	0.01173	1.1628	0.244911	16228	25	-0.0206	0.0023	A	0.6679	-0.01357
16:6315880	genus.Sellimonas.id.14369	A/G	G	0.02525	0.02639	0.9682	0.332944	3200	22	-0.0206	0.0023	A	0.6679	-0.02525
16:6315880	genus.Subdoligranulum.id.2070	A/G	G	-0.0003	0.01122	0.0142	0.98883	17712	25	-0.0206	0.0023	A	0.6679	0.0003
16:7666402	family.Ruminococcaceae.id.2050	C/T	C	-0.00478	0.0108	-0.4679	0.639785	18466	25	0.0219	0.0022	T	0.6159	0.00478
16:7666402	genus..Eubacteriumventriosumgroup.id.11341	C/T	C	0.01153	0.01182	0.9404	0.347012	15419	25	0.0219	0.0022	T	0.6159	-0.01153
16:7666402	genus..Ruminococcusgauvreauiigroup.id.11342	C/T	C	0.00069	0.01262	0.0222	0.982448	13513	25	0.0219	0.0022	T	0.6159	-0.00069
16:7666402	genus.Coprococcus3.id.11303	C/T	C	-0.01214	0.01161	-1.0174	0.308868	15966	25	0.0219	0.0022	T	0.6159	0.01214
16:7666402	genus.Eggerthella.id.819	C/T	C	0.00518	0.02028	0.1907	0.848839	5203	23	0.0219	0.0022	T	0.6159	-0.00518
16:7666402	genus.Hungatella.id.11306	C/T	C	0.0094	0.0224	0.3804	0.703649	4278	23	0.0219	0.0022	T	0.6159	-0.0094
16:7666402	genus.Lachnoclostridium.id.11308	C/T	C	-0.00544	0.01093	-0.4626	0.643651	18053	25	0.0219	0.0022	T	0.6159	0.00544
16:7666402	genus.LachnospiraceaeUCG001.id.11321	C/T	C	-0.01085	0.01443	-0.7207	0.471033	10257	25	0.0219	0.0022	T	0.6159	0.01085
16:7666402	genus.RuminococcaceaeUCG002.id.11360	C/T	C	-0.00047	0.01118	-0.0076	0.993777	17228	25	0.0219	0.0022	T	0.6159	0.00047
16:7666402	genus.RuminococcaceaeUCG003.id.11361	C/T	C	0.00026	0.01218	0.009	0.992979	14532	25	0.0219	0.0022	T	0.6159	-0.00026
16:7666402	genus.RuminococcaceaeUCG005.id.11363	C/T	C	0.01257	0.01151	1.0804	0.279964	16235	25	0.0219	0.0022	T	0.6159	-0.01257
16:7666402	genus.Sellimonas.id.14369	C/T	C	-0.02715	0.02559	-1.0497	0.29381	3202	22	0.0219	0.0022	T	0.6159	0.02715
16:7666402	genus.Subdoligranulum.id.2070	C/T	C	-0.00137	0.01102	-0.1612	0.871936	17722	25	0.0219	0.0022	T	0.6159	0.00137
17:27363750	family.Ruminococcaceae.id.2050	G/A	A	-0.00046	0.01714	-0.109	0.913202	17540	23	0.0248	0.0034	A	0.1165	-0.00046
17:27363750	genus..Eubacteriumventriosumgroup.id.11341	G/A	A	0.00165	0.01865	-0.0349	0.97208	14632	23	0.0248	0.0034	A	0.1165	0.00165
17:27363750	genus..Ruminococcusgauvreauiigroup.id.11342	G/A	A	-0.00352	0.01997	-0.3411	0.732953	12883	23	0.0248	0.0034	A	0.1165	-0.00352
17:27363750	genus.Coprococcus3.id.11303	G/A	A	0.02887	0.01838	1.4602	0.14429	15192	23	0.0248	0.0034	A	0.1165	0.02887
17:27363750	genus.Eggerthella.id.819	G/A	A	0.02557	0.03196	0.8353	0.403605	4898	21	0.0248	0.0034	A	0.1165	0.02557
17:27363750	genus.Hungatella.id.11306	G/A	A	-0.06179	0.03571	-1.7368	0.0824225	4019	21	0.0248	0.0034	A	0.1165	-0.06179
17:27363750	genus.Lachnoclostridium.id.11308	G/A	A	-0.02035	0.01734	-1.2637	0.206302	17129	23	0.0248	0.0034	A	0.1165	-0.02035
17:27363750	genus.LachnospiraceaeUCG001.id.11321	G/A	A	0.03589	0.02256	1.5739	0.115534	9972	23	0.0248	0.0034	A	0.1165	0.03589
17:27363750	genus.RuminococcaceaeUCG002.id.11360	G/A	A	-0.01938	0.0177	-1.14	0.254203	16412	23	0.0248	0.0034	A	0.1165	-0.01938
17:27363750	genus.RuminococcaceaeUCG003.id.11361	G/A	A	-0.01149	0.01934	-0.6088	0.542657	13767	23	0.0248	0.0034	A	0.1165	-0.01149
17:27363750	genus.RuminococcaceaeUCG005.id.11363	G/A	A	-0.01397	0.01817	-0.7214	0.470663	15512	23	0.0248	0.0034	A	0.1165	-0.01397
17:27363750	genus.Sellimonas.id.14369	G/A	A	-0.03246	0.03963	-0.8	0.423711	3154	21	0.0248	0.0034	A	0.1165	-0.03246
17:27363750	genus.Subdoligranulum.id.2070	G/A	A	0.01307	0.01748	0.674	0.500311	16843	23	0.0248	0.0034	A	0.1165	0.01307
18:35138245	family.Ruminococcaceae.id.2050	G/A	A	0.00831	0.01103	0.7757	0.437985	18461	25	0.0207	0.0023	A	0.3295	0.00831
18:35138245	genus..Eubacteriumventriosumgroup.id.11341	G/A	A	0.00511	0.01209	0.4218	0.673317	15416	25	0.0207	0.0023	A	0.3295	0.00511
18:35138245	genus..Ruminococcusgauvreauiigroup.id.11342	G/A	A	-0.00881	0.01289	-0.6642	0.506434	13509	25	0.0207	0.0023	A	0.3295	-0.00881
18:35138245	genus.Coprococcus3.id.11303	G/A	A	0.01191	0.01187	0.9947	0.319931	15963	25	0.0207	0.0023	A	0.3295	0.01191
18:35138245	genus.Eggerthella.id.819	G/A	A	0.02247	0.02084	1.0714	0.28408	5203	23	0.0207	0.0023	A	0.3295	0.02247
18:35138245	genus.Hungatella.id.11306	G/A	A	0.01128	0.02286	0.5064	0.612716	4276	23	0.0207	0.0023	A	0.3295	0.01128
18:35138245	genus.Lachnoclostridium.id.11308	G/A	A	-0.00206	0.01116	-0.1667	0.867527	18049	25	0.0207	0.0023	A	0.3295	-0.00206
18:35138245	genus.LachnospiraceaeUCG001.id.11321	G/A	A	-0.01566	0.01483	-1.0666	0.286062	10255	25	0.0207	0.0023	A	0.3295	-0.01566
18:35138245	genus.RuminococcaceaeUCG002.id.11360	G/A	A	0.00545	0.01142	0.5051	0.613559	17224	25	0.0207	0.0023	A	0.3295	0.00545
18:35138245	genus.RuminococcaceaeUCG003.id.11361	G/A	A	-0.01055	0.01243	-0.8083	0.41886	14528	25	0.0207	0.0023	A	0.3295	-0.01055
18:35138245	genus.RuminococcaceaeUCG005.id.11363	G/A	A	0.01376	0.01177	1.1469	0.251464	16232	25	0.0207	0.0023	A	0.3295	0.01376
18:35138245	genus.Sellimonas.id.14369	G/A	A	5e-05	0.0266	-0.0071	0.994255	3201	22	0.0207	0.0023	A	0.3295	5e-05
18:35138245	genus.Subdoligranulum.id.2070	G/A	A	-0.00317	0.01126	-0.2925	0.769828	17718	25	0.0207	0.0023	A	0.3295	-0.00317
18:50731802	family.Ruminococcaceae.id.2050	G/A	A	0.01352	0.0108	1.2557	0.209261	17657	24	0.0242	0.0022	A	0.4326	0.01352
18:50731802	genus..Eubacteriumventriosumgroup.id.11341	G/A	A	0.00396	0.01179	0.3175	0.75094	14712	24	0.0242	0.0022	A	0.4326	0.00396
18:50731802	genus..Ruminococcusgauvreauiigroup.id.11342	G/A	A	0.015	0.01257	1.1979	0.230995	12972	24	0.0242	0.0022	A	0.4326	0.015
18:50731802	genus.Coprococcus3.id.11303	G/A	A	0.00225	0.01158	0.1957	0.844923	15288	24	0.0242	0.0022	A	0.4326	0.00225
18:50731802	genus.Eggerthella.id.819	G/A	A	0.04479	0.02021	2.2152	0.0267601	4962	22	0.0242	0.0022	A	0.4326	0.04479
18:50731802	genus.Hungatella.id.11306	G/A	A	-0.00788	0.02241	-0.3431	0.731448	4079	22	0.0242	0.0022	A	0.4326	-0.00788
18:50731802	genus.Lachnoclostridium.id.11308	G/A	A	0.00338	0.01092	0.3162	0.751851	17246	24	0.0242	0.0022	A	0.4326	0.00338
18:50731802	genus.LachnospiraceaeUCG001.id.11321	G/A	A	0.00166	0.01427	0.142	0.88708	10026	24	0.0242	0.0022	A	0.4326	0.00166
18:50731802	genus.RuminococcaceaeUCG002.id.11360	G/A	A	0.01397	0.01116	1.2481	0.212031	16509	24	0.0242	0.0022	A	0.4326	0.01397
18:50731802	genus.RuminococcaceaeUCG003.id.11361	G/A	A	-0.00173	0.01218	-0.1475	0.882658	13859	24	0.0242	0.0022	A	0.4326	-0.00173
18:50731802	genus.RuminococcaceaeUCG005.id.11363	G/A	A	0.01145	0.01146	1.028	0.30395	15607	24	0.0242	0.0022	A	0.4326	0.01145
18:50731802	genus.Sellimonas.id.14369	G/A	A	0.01975	0.02516	0.7555	0.450009	3202	22	0.0242	0.0022	A	0.4326	0.01975
18:50731802	genus.Subdoligranulum.id.2070	G/A	A	0.00547	0.01101	0.4839	0.628528	16953	24	0.0242	0.0022	A	0.4326	0.00547
18:52488672	family.Ruminococcaceae.id.2050	C/T	T	0.02903	0.01233	2.3648	0.0180398	18465	25	-0.0199	0.0026	T	0.2274	0.02903
18:52488672	genus..Eubacteriumventriosumgroup.id.11341	C/T	T	-0.00676	0.01353	-0.5904	0.554923	15419	25	-0.0199	0.0026	T	0.2274	-0.00676
18:52488672	genus..Ruminococcusgauvreauiigroup.id.11342	C/T	T	0.00558	0.01449	0.4963	0.619753	13513	25	-0.0199	0.0026	T	0.2274	0.00558
18:52488672	genus.Coprococcus3.id.11303	C/T	T	-0.00245	0.01328	-0.2089	0.834448	15966	25	-0.0199	0.0026	T	0.2274	-0.00245
18:52488672	genus.Eggerthella.id.819	C/T	T	0.02244	0.0234	0.8815	0.378101	5203	23	-0.0199	0.0026	T	0.2274	0.02244
18:52488672	genus.Hungatella.id.11306	C/T	T	0.00328	0.02603	0.1419	0.887238	4278	23	-0.0199	0.0026	T	0.2274	0.00328
18:52488672	genus.Lachnoclostridium.id.11308	C/T	T	-0.00412	0.01248	-0.3668	0.713768	18052	25	-0.0199	0.0026	T	0.2274	-0.00412
18:52488672	genus.LachnospiraceaeUCG001.id.11321	C/T	T	-0.02286	0.01662	-1.3309	0.183189	10257	25	-0.0199	0.0026	T	0.2274	-0.02286
18:52488672	genus.RuminococcaceaeUCG002.id.11360	C/T	T	0.01291	0.01278	1.0356	0.300482	17227	25	-0.0199	0.0026	T	0.2274	0.01291
18:52488672	genus.RuminococcaceaeUCG003.id.11361	C/T	T	0.01755	0.01392	1.1838	0.236492	14531	25	-0.0199	0.0026	T	0.2274	0.01755
18:52488672	genus.RuminococcaceaeUCG005.id.11363	C/T	T	0.00736	0.01316	0.544	0.586579	16234	25	-0.0199	0.0026	T	0.2274	0.00736
18:52488672	genus.Sellimonas.id.14369	C/T	T	-0.00289	0.03002	-0.1393	0.889134	3202	22	-0.0199	0.0026	T	0.2274	-0.00289
18:52488672	genus.Subdoligranulum.id.2070	C/T	T	0.03386	0.01259	2.6289	0.00856867	17721	25	-0.0199	0.0026	T	0.2274	0.03386
18:53099012	family.Ruminococcaceae.id.2050	G/C	G	-0.00815	0.01131	-0.798	0.424754	18453	25	-0.0256	0.0024	C	0.6984	0.00815
18:53099012	genus..Eubacteriumventriosumgroup.id.11341	G/C	G	-0.00101	0.0124	-0.0961	0.923362	15409	25	-0.0256	0.0024	C	0.6984	0.00101
18:53099012	genus..Ruminococcusgauvreauiigroup.id.11342	G/C	G	0.0014	0.01322	0.0872	0.930513	13503	25	-0.0256	0.0024	C	0.6984	-0.0014
18:53099012	genus.Coprococcus3.id.11303	G/C	G	-0.00677	0.01218	-0.5774	0.563534	15957	25	-0.0256	0.0024	C	0.6984	0.00677
18:53099012	genus.Eggerthella.id.819	G/C	G	-0.00891	0.02139	-0.4081	0.683127	5203	23	-0.0256	0.0024	C	0.6984	0.00891
18:53099012	genus.Hungatella.id.11306	G/C	G	-0.03747	0.02332	-1.5665	0.117208	4272	23	-0.0256	0.0024	C	0.6984	0.03747
18:53099012	genus.Lachnoclostridium.id.11308	G/C	G	-0.01685	0.01144	-1.4012	0.161094	18041	25	-0.0256	0.0024	C	0.6984	0.01685
18:53099012	genus.LachnospiraceaeUCG001.id.11321	G/C	G	0.01223	0.01527	0.8238	0.410167	10252	25	-0.0256	0.0024	C	0.6984	-0.01223
18:53099012	genus.RuminococcaceaeUCG002.id.11360	G/C	G	-0.00655	0.01172	-0.66	0.509125	17216	25	-0.0256	0.0024	C	0.6984	0.00655
18:53099012	genus.RuminococcaceaeUCG003.id.11361	G/C	G	0.01276	0.01274	0.983	0.325706	14521	25	-0.0256	0.0024	C	0.6984	-0.01276
18:53099012	genus.RuminococcaceaeUCG005.id.11363	G/C	G	-0.00989	0.01209	-0.9068	0.364513	16227	25	-0.0256	0.0024	C	0.6984	0.00989
18:53099012	genus.Sellimonas.id.14369	G/C	G	-0.0333	0.02742	-1.161	0.245642	3200	22	-0.0256	0.0024	C	0.6984	0.0333
18:53099012	genus.Subdoligranulum.id.2070	G/C	G	-0.01243	0.01155	-1.1242	0.260843	17711	25	-0.0256	0.0024	C	0.6984	0.01243
18:77580712	family.Ruminococcaceae.id.2050	G/A	A	0.00803	0.01379	0.5933	0.553047	17873	23	0.02	0.0027	A	0.201	0.00803
18:77580712	genus..Eubacteriumventriosumgroup.id.11341	G/A	A	-0.00601	0.01502	-0.3973	0.691073	14967	23	0.02	0.0027	A	0.201	-0.00601
18:77580712	genus..Ruminococcusgauvreauiigroup.id.11342	G/A	A	0.02271	0.01609	1.371	0.170375	13032	23	0.02	0.0027	A	0.201	0.02271
18:77580712	genus.Coprococcus3.id.11303	G/A	A	0.0163	0.01477	1.1119	0.266224	15511	23	0.02	0.0027	A	0.201	0.0163
18:77580712	genus.Eggerthella.id.819	G/A	A	-0.00402	0.0255	-0.1658	0.868157	5139	22	0.02	0.0027	A	0.201	-0.00402
18:77580712	genus.Hungatella.id.11306	G/A	A	-0.00019	0.02889	0.0222	0.982288	3980	21	0.02	0.0027	A	0.201	-0.00019
18:77580712	genus.Lachnoclostridium.id.11308	G/A	A	0.01133	0.01393	0.8385	0.401806	17496	23	0.02	0.0027	A	0.201	0.01133
18:77580712	genus.LachnospiraceaeUCG001.id.11321	G/A	A	0.01108	0.01829	0.677	0.498406	10016	23	0.02	0.0027	A	0.201	0.01108
18:77580712	genus.RuminococcaceaeUCG002.id.11360	G/A	A	-0.00146	0.01425	-0.1036	0.917487	16690	23	0.02	0.0027	A	0.201	-0.00146
18:77580712	genus.RuminococcaceaeUCG003.id.11361	G/A	A	0.00754	0.01555	0.5162	0.605715	14037	23	0.02	0.0027	A	0.201	0.00754
18:77580712	genus.RuminococcaceaeUCG005.id.11363	G/A	A	-0.00203	0.0146	-0.1422	0.886922	15861	23	0.02	0.0027	A	0.201	-0.00203
18:77580712	genus.Sellimonas.id.14369	G/A	A	-0.03255	0.0325	-1.0088	0.313071	3095	20	0.02	0.0027	A	0.201	-0.03255
18:77580712	genus.Subdoligranulum.id.2070	G/A	A	-0.01588	0.01405	-1.2475	0.212178	17191	23	0.02	0.0027	A	0.201	-0.01588
2:157111313	family.Ruminococcaceae.id.2050	C/T	C	-0.00403	0.01277	-0.3408	0.733104	18462	25	0.0232	0.0027	T	0.7917	0.00403
2:157111313	genus..Eubacteriumventriosumgroup.id.11341	C/T	C	-2e-05	0.01399	-0.0277	0.977822	15416	25	0.0232	0.0027	T	0.7917	2e-05
2:157111313	genus..Ruminococcusgauvreauiigroup.id.11342	C/T	C	0.01641	0.01492	1.1141	0.265279	13510	25	0.0232	0.0027	T	0.7917	-0.01641
2:157111313	genus.Coprococcus3.id.11303	C/T	C	0.02137	0.01374	1.5762	0.11498	15963	25	0.0232	0.0027	T	0.7917	-0.02137
2:157111313	genus.Eggerthella.id.819	C/T	C	0.02404	0.02412	0.9677	0.333244	5203	23	0.0232	0.0027	T	0.7917	-0.02404
2:157111313	genus.Hungatella.id.11306	C/T	C	0.02871	0.0262	0.9869	0.323741	4276	23	0.0232	0.0027	T	0.7917	-0.02871
2:157111313	genus.Lachnoclostridium.id.11308	C/T	C	-0.01738	0.01291	-1.2629	0.206589	18049	25	0.0232	0.0027	T	0.7917	0.01738
2:157111313	genus.LachnospiraceaeUCG001.id.11321	C/T	C	0.00892	0.01722	0.4981	0.618484	10256	25	0.0232	0.0027	T	0.7917	-0.00892
2:157111313	genus.RuminococcaceaeUCG002.id.11360	C/T	C	-0.00161	0.01322	-0.1512	0.879818	17224	25	0.0232	0.0027	T	0.7917	0.00161
2:157111313	genus.RuminococcaceaeUCG003.id.11361	C/T	C	-0.01494	0.01437	-1.0457	0.295653	14529	25	0.0232	0.0027	T	0.7917	0.01494
2:157111313	genus.RuminococcaceaeUCG005.id.11363	C/T	C	0.01065	0.01365	0.7831	0.433627	16232	25	0.0232	0.0027	T	0.7917	-0.01065
2:157111313	genus.Sellimonas.id.14369	C/T	C	0.03108	0.03092	1.0131	0.31106	3201	22	0.0232	0.0027	T	0.7917	-0.03108
2:157111313	genus.Subdoligranulum.id.2070	C/T	C	-0.00389	0.01303	-0.3222	0.74715	17719	25	0.0232	0.0027	T	0.7917	0.00389
2:208044470	family.Ruminococcaceae.id.2050	A/G	A	-0.01175	0.01136	-1.0148	0.310201	18462	25	0.017	0.0024	A	0.3136	-0.01175
2:208044470	genus..Eubacteriumventriosumgroup.id.11341	A/G	A	0.00893	0.01239	0.6799	0.496631	15416	25	0.017	0.0024	A	0.3136	0.00893
2:208044470	genus..Ruminococcusgauvreauiigroup.id.11342	A/G	A	-0.0331	0.01324	-2.5154	0.011883	13510	25	0.017	0.0024	A	0.3136	-0.0331
2:208044470	genus.Coprococcus3.id.11303	A/G	A	-0.00952	0.01218	-0.7335	0.463193	15963	25	0.017	0.0024	A	0.3136	-0.00952
2:208044470	genus.Eggerthella.id.819	A/G	A	0.00287	0.02124	0.113	0.910031	5203	23	0.017	0.0024	A	0.3136	0.00287
2:208044470	genus.Hungatella.id.11306	A/G	A	0.02665	0.02355	1.2439	0.213573	4276	23	0.017	0.0024	A	0.3136	0.02665
2:208044470	genus.Lachnoclostridium.id.11308	A/G	A	0.00602	0.01149	0.4732	0.636213	18049	25	0.017	0.0024	A	0.3136	0.00602
2:208044470	genus.LachnospiraceaeUCG001.id.11321	A/G	A	0.01967	0.01509	1.1951	0.232087	10256	25	0.017	0.0024	A	0.3136	0.01967
2:208044470	genus.RuminococcaceaeUCG002.id.11360	A/G	A	-0.01589	0.01174	-1.262	0.206949	17224	25	0.017	0.0024	A	0.3136	-0.01589
2:208044470	genus.RuminococcaceaeUCG003.id.11361	A/G	A	-0.01692	0.0128	-1.293	0.196011	14529	25	0.017	0.0024	A	0.3136	-0.01692
2:208044470	genus.RuminococcaceaeUCG005.id.11363	A/G	A	-0.00555	0.01208	-0.3787	0.704836	16232	25	0.017	0.0024	A	0.3136	-0.00555
2:208044470	genus.Sellimonas.id.14369	A/G	A	0.01507	0.02676	0.5426	0.587405	3201	22	0.017	0.0024	A	0.3136	0.01507
2:208044470	genus.Subdoligranulum.id.2070	A/G	A	-0.00853	0.01158	-0.7345	0.462583	17719	25	0.017	0.0024	A	0.3136	-0.00853
2:22503044	family.Ruminococcaceae.id.2050	T/A	A	-0.00442	0.01044	-0.4313	0.666178	18467	25	-0.0211	0.0022	A	0.5325	-0.00442
2:22503044	genus..Eubacteriumventriosumgroup.id.11341	T/A	A	-0.01503	0.01143	-1.3227	0.185902	15420	25	-0.0211	0.0022	A	0.5325	-0.01503
2:22503044	genus..Ruminococcusgauvreauiigroup.id.11342	T/A	A	0.00172	0.01221	0.1425	0.886764	13514	25	-0.0211	0.0022	A	0.5325	0.00172
2:22503044	genus.Coprococcus3.id.11303	T/A	A	0.00216	0.01123	0.2049	0.837728	15967	25	-0.0211	0.0022	A	0.5325	0.00216
2:22503044	genus.Eggerthella.id.819	T/A	A	-0.01269	0.01966	-0.6544	0.512725	5203	23	-0.0211	0.0022	A	0.5325	-0.01269
2:22503044	genus.Hungatella.id.11306	T/A	A	0.03435	0.02165	1.5688	0.116741	4279	23	-0.0211	0.0022	A	0.5325	0.03435
2:22503044	genus.Lachnoclostridium.id.11308	T/A	A	-0.01096	0.01056	-1.0036	0.315571	18054	25	-0.0211	0.0022	A	0.5325	-0.01096
2:22503044	genus.LachnospiraceaeUCG001.id.11321	T/A	A	0.01467	0.01399	1.031	0.302541	10258	25	-0.0211	0.0022	A	0.5325	0.01467
2:22503044	genus.RuminococcaceaeUCG002.id.11360	T/A	A	0.00686	0.01081	0.6222	0.533942	17229	25	-0.0211	0.0022	A	0.5325	0.00686
2:22503044	genus.RuminococcaceaeUCG003.id.11361	T/A	A	0.00273	0.01178	0.2236	0.823069	14533	25	-0.0211	0.0022	A	0.5325	0.00273
2:22503044	genus.RuminococcaceaeUCG005.id.11363	T/A	A	0.01895	0.01113	1.6905	0.0909515	16235	25	-0.0211	0.0022	A	0.5325	0.01895
2:22503044	genus.Sellimonas.id.14369	T/A	A	-0.01495	0.02502	-0.5928	0.553315	3202	22	-0.0211	0.0022	A	0.5325	-0.01495
2:22503044	genus.Subdoligranulum.id.2070	T/A	A	-0.00441	0.01066	-0.4147	0.678288	17723	25	-0.0211	0.0022	A	0.5325	-0.00441
2:58012833	family.Ruminococcaceae.id.2050	C/T	T	0.00872	0.01073	0.8398	0.401133	18468	25	0.0293	0.0022	T	0.3851	0.00872
2:58012833	genus..Eubacteriumventriosumgroup.id.11341	C/T	T	0.01195	0.01173	1.0261	0.304892	15421	25	0.0293	0.0022	T	0.3851	0.01195
2:58012833	genus..Ruminococcusgauvreauiigroup.id.11342	C/T	T	-0.00806	0.01253	-0.6209	0.5346	13515	25	0.0293	0.0022	T	0.3851	-0.00806
2:58012833	genus.Coprococcus3.id.11303	C/T	T	-0.00114	0.01154	-0.1025	0.91828	15968	25	0.0293	0.0022	T	0.3851	-0.00114
2:58012833	genus.Eggerthella.id.819	C/T	T	-0.03377	0.02017	-1.632	0.102679	5203	23	0.0293	0.0022	T	0.3851	-0.03377
2:58012833	genus.Hungatella.id.11306	C/T	T	0.02206	0.02226	0.9778	0.328173	4279	23	0.0293	0.0022	T	0.3851	0.02206
2:58012833	genus.Lachnoclostridium.id.11308	C/T	T	-0.02299	0.01085	-2.124	0.0336534	18055	25	0.0293	0.0022	T	0.3851	-0.02299
2:58012833	genus.LachnospiraceaeUCG001.id.11321	C/T	T	0.00282	0.01438	0.169	0.865797	10258	25	0.0293	0.0022	T	0.3851	0.00282
2:58012833	genus.RuminococcaceaeUCG002.id.11360	C/T	T	-0.01023	0.0111	-0.9059	0.364936	17230	25	0.0293	0.0022	T	0.3851	-0.01023
2:58012833	genus.RuminococcaceaeUCG003.id.11361	C/T	T	-0.00137	0.01209	-0.1322	0.894668	14534	25	0.0293	0.0022	T	0.3851	-0.00137
2:58012833	genus.RuminococcaceaeUCG005.id.11363	C/T	T	-0.01294	0.01144	-1.1354	0.256208	16236	25	0.0293	0.0022	T	0.3851	-0.01294
2:58012833	genus.Sellimonas.id.14369	C/T	T	0.04479	0.02566	1.7595	0.0785096	3202	22	0.0293	0.0022	T	0.3851	0.04479
2:58012833	genus.Subdoligranulum.id.2070	C/T	T	0.00698	0.01095	0.673	0.501075	17724	25	0.0293	0.0022	T	0.3851	0.00698
2:86819128	family.Ruminococcaceae.id.2050	T/C	C	0.00464	0.0146	0.3366	0.736569	17657	24	-0.0215	0.003	T	0.8458	-0.00464
2:86819128	genus..Eubacteriumventriosumgroup.id.11341	T/C	C	0.01018	0.01591	0.6425	0.520613	14712	24	-0.0215	0.003	T	0.8458	-0.01018
2:86819128	genus..Ruminococcusgauvreauiigroup.id.11342	T/C	C	0.00158	0.01692	0.0808	0.93576	12972	24	-0.0215	0.003	T	0.8458	-0.00158
2:86819128	genus.Coprococcus3.id.11303	T/C	C	0.0055	0.01565	0.3045	0.760823	15288	24	-0.0215	0.003	T	0.8458	-0.0055
2:86819128	genus.Eggerthella.id.819	T/C	C	-0.02403	0.02707	-0.9483	0.342926	4962	22	-0.0215	0.003	T	0.8458	0.02403
2:86819128	genus.Hungatella.id.11306	T/C	C	-0.03523	0.02988	-1.1825	0.236968	4079	22	-0.0215	0.003	T	0.8458	0.03523
2:86819128	genus.Lachnoclostridium.id.11308	T/C	C	0.02851	0.01476	1.9102	0.0561332	17246	24	-0.0215	0.003	T	0.8458	-0.02851
2:86819128	genus.LachnospiraceaeUCG001.id.11321	T/C	C	0.00031	0.01926	-0.0798	0.936396	10026	24	-0.0215	0.003	T	0.8458	-0.00031
2:86819128	genus.RuminococcaceaeUCG002.id.11360	T/C	C	-0.03925	0.01507	-2.4374	0.0147933	16509	24	-0.0215	0.003	T	0.8458	0.03925
2:86819128	genus.RuminococcaceaeUCG003.id.11361	T/C	C	-0.01274	0.01645	-0.7609	0.446657	13859	24	-0.0215	0.003	T	0.8458	0.01274
2:86819128	genus.RuminococcaceaeUCG005.id.11363	T/C	C	-0.01795	0.01547	-1.0681	0.28543	15607	24	-0.0215	0.003	T	0.8458	0.01795
2:86819128	genus.Sellimonas.id.14369	T/C	C	0.10175	0.03377	2.9524	0.00315314	3202	22	-0.0215	0.003	T	0.8458	-0.10175
2:86819128	genus.Subdoligranulum.id.2070	T/C	C	0.02187	0.01488	1.4295	0.152889	16953	24	-0.0215	0.003	T	0.8458	-0.02187
20:39997404	family.Ruminococcaceae.id.2050	G/T	T	-0.00204	0.09296	-0.0485	0.961238	595	2	0.0244	0.0028	T	0.1778	-0.00204
20:39997404	genus..Eubacteriumventriosumgroup.id.11341	G/T	T	0.0273	0.10604	0.2063	0.836635	454	2	0.0244	0.0028	T	0.1778	0.0273
20:39997404	genus..Ruminococcusgauvreauiigroup.id.11342	G/T	T	0.02977	0.10301	0.2586	0.796098	483	2	0.0244	0.0028	T	0.1778	0.02977
20:39997404	genus.Coprococcus3.id.11303	G/T	T	0.11258	0.10564	0.9732	0.330553	457	2	0.0244	0.0028	T	0.1778	0.11258
20:39997404	genus.Eggerthella.id.819	G/T	T	0.31489	0.30996	1.0159	0.309725	64	1	0.0244	0.0028	T	0.1778	0.31489
20:39997404	genus.Hungatella.id.11306	G/T	T	0.02584	0.1312	0.1773	0.859351	299	2	0.0244	0.0028	T	0.1778	0.02584
20:39997404	genus.Lachnoclostridium.id.11308	G/T	T	0.02765	0.09605	0.298	0.765703	559	2	0.0244	0.0028	T	0.1778	0.02765
20:39997404	genus.LachnospiraceaeUCG001.id.11321	G/T	T	0.11079	0.14563	0.7039	0.481557	242	2	0.0244	0.0028	T	0.1778	0.11079
20:39997404	genus.RuminococcaceaeUCG002.id.11360	G/T	T	-0.03907	0.09738	-0.4257	0.670254	540	2	0.0244	0.0028	T	0.1778	-0.03907
20:39997404	genus.RuminococcaceaeUCG003.id.11361	G/T	T	0.10287	0.10107	0.9324	0.35113	497	2	0.0244	0.0028	T	0.1778	0.10287
20:39997404	genus.RuminococcaceaeUCG005.id.11363	G/T	T	0.06124	0.1178	0.5114	0.609071	375	2	0.0244	0.0028	T	0.1778	0.06124
20:39997404	genus.Sellimonas.id.14369	G/T	T	0.20678	0.22409	0.9687	0.332745	107	2	0.0244	0.0028	T	0.1778	0.20678
20:39997404	genus.Subdoligranulum.id.2070	G/T	T	0.10879	0.09803	1.0426	0.297226	533	2	0.0244	0.0028	T	0.1778	0.10879
20:44680853	family.Ruminococcaceae.id.2050	A/G	A	-0.00242	0.01201	-0.2249	0.821979	18367	24	0.0191	0.0025	A	0.2584	-0.00242
20:44680853	genus..Eubacteriumventriosumgroup.id.11341	A/G	A	-0.01275	0.01311	-0.9907	0.321783	15331	24	0.0191	0.0025	A	0.2584	-0.01275
20:44680853	genus..Ruminococcusgauvreauiigroup.id.11342	A/G	A	0.01595	0.01401	1.091	0.275273	13426	24	0.0191	0.0025	A	0.2584	0.01595
20:44680853	genus.Coprococcus3.id.11303	A/G	A	0.00092	0.0129	0.0708	0.943557	15879	24	0.0191	0.0025	A	0.2584	0.00092
20:44680853	genus.Eggerthella.id.819	A/G	A	0.01207	0.02247	0.5098	0.610332	5175	22	0.0191	0.0025	A	0.2584	0.01207
20:44680853	genus.Hungatella.id.11306	A/G	A	0.06607	0.02476	2.6507	0.00803489	4257	22	0.0191	0.0025	A	0.2584	0.06607
20:44680853	genus.Lachnoclostridium.id.11308	A/G	A	0.00734	0.01214	0.627	0.53079	17956	24	0.0191	0.0025	A	0.2584	0.00734
20:44680853	genus.LachnospiraceaeUCG001.id.11321	A/G	A	-0.00366	0.01606	-0.248	0.80398	10205	24	0.0191	0.0025	A	0.2584	-0.00366
20:44680853	genus.RuminococcaceaeUCG002.id.11360	A/G	A	0.01382	0.01243	1.1159	0.264508	17134	24	0.0191	0.0025	A	0.2584	0.01382
20:44680853	genus.RuminococcaceaeUCG003.id.11361	A/G	A	-0.00409	0.01353	-0.3322	0.739587	14456	24	0.0191	0.0025	A	0.2584	-0.00409
20:44680853	genus.RuminococcaceaeUCG005.id.11363	A/G	A	0.01374	0.0128	1.0606	0.288963	16155	24	0.0191	0.0025	A	0.2584	0.01374
20:44680853	genus.Sellimonas.id.14369	A/G	A	0.06509	0.02866	2.2233	0.0262023	3185	21	0.0191	0.0025	A	0.2584	0.06509
20:44680853	genus.Subdoligranulum.id.2070	A/G	A	-0.00514	0.01226	-0.4249	0.670837	17626	24	0.0191	0.0025	A	0.2584	-0.00514
22:41487218	family.Ruminococcaceae.id.2050	C/T	C	-0.00931	0.01193	-0.8632	0.387918	17657	24	-0.0301	0.0024	T	0.7155	0.00931
22:41487218	genus..Eubacteriumventriosumgroup.id.11341	C/T	C	0.01844	0.01311	1.4692	0.141833	14712	24	-0.0301	0.0024	T	0.7155	-0.01844
22:41487218	genus..Ruminococcusgauvreauiigroup.id.11342	C/T	C	-0.01929	0.01394	-1.3507	0.17676	12972	24	-0.0301	0.0024	T	0.7155	0.01929
22:41487218	genus.Coprococcus3.id.11303	C/T	C	0.02003	0.01285	1.5317	0.125621	15288	24	-0.0301	0.0024	T	0.7155	-0.02003
22:41487218	genus.Eggerthella.id.819	C/T	C	-0.00417	0.02273	-0.133	0.894035	4962	22	-0.0301	0.0024	T	0.7155	0.00417
22:41487218	genus.Hungatella.id.11306	C/T	C	-0.01671	0.02485	-0.6263	0.531053	4079	22	-0.0301	0.0024	T	0.7155	0.01671
22:41487218	genus.Lachnoclostridium.id.11308	C/T	C	0.00672	0.01208	0.5623	0.57398	17246	24	-0.0301	0.0024	T	0.7155	-0.00672
22:41487218	genus.LachnospiraceaeUCG001.id.11321	C/T	C	0.01703	0.0159	1.0706	0.284439	10026	24	-0.0301	0.0024	T	0.7155	-0.01703
22:41487218	genus.RuminococcaceaeUCG002.id.11360	C/T	C	0.00502	0.01235	0.3419	0.732501	16509	24	-0.0301	0.0024	T	0.7155	-0.00502
22:41487218	genus.RuminococcaceaeUCG003.id.11361	C/T	C	-0.02167	0.01348	-1.6428	0.100424	13859	24	-0.0301	0.0024	T	0.7155	0.02167
22:41487218	genus.RuminococcaceaeUCG005.id.11363	C/T	C	0.00199	0.01272	0.0958	0.923679	15607	24	-0.0301	0.0024	T	0.7155	-0.00199
22:41487218	genus.Sellimonas.id.14369	C/T	C	-0.02883	0.02816	-0.9802	0.326987	3202	22	-0.0301	0.0024	T	0.7155	0.02883
22:41487218	genus.Subdoligranulum.id.2070	C/T	C	0.00916	0.01218	0.7067	0.479815	16953	24	-0.0301	0.0024	T	0.7155	-0.00916
3:117509984	family.Ruminococcaceae.id.2050	C/T	T	-0.00129	0.01209	-0.0733	0.941488	17648	24	0.0177	0.0024	T	0.2833	-0.00129
3:117509984	genus..Eubacteriumventriosumgroup.id.11341	C/T	T	-0.00315	0.01317	-0.1977	0.843202	14705	24	0.0177	0.0024	T	0.2833	-0.00315
3:117509984	genus..Ruminococcusgauvreauiigroup.id.11342	C/T	T	0.00453	0.01407	0.3009	0.763567	12965	24	0.0177	0.0024	T	0.2833	0.00453
3:117509984	genus.Coprococcus3.id.11303	C/T	T	0.00207	0.01297	0.1324	0.894826	15281	24	0.0177	0.0024	T	0.2833	0.00207
3:117509984	genus.Eggerthella.id.819	C/T	T	0.04058	0.02253	1.7712	0.0765607	4962	22	0.0177	0.0024	T	0.2833	0.04058
3:117509984	genus.Hungatella.id.11306	C/T	T	-0.00489	0.02495	-0.193	0.846959	4075	22	0.0177	0.0024	T	0.2833	-0.00489
3:117509984	genus.Lachnoclostridium.id.11308	C/T	T	-0.00269	0.01222	-0.2844	0.776104	17238	24	0.0177	0.0024	T	0.2833	-0.00269
3:117509984	genus.LachnospiraceaeUCG001.id.11321	C/T	T	0.03084	0.01595	1.9355	0.0529412	10022	24	0.0177	0.0024	T	0.2833	0.03084
3:117509984	genus.RuminococcaceaeUCG002.id.11360	C/T	T	-0.00882	0.01249	-0.713	0.475722	16501	24	0.0177	0.0024	T	0.2833	-0.00882
3:117509984	genus.RuminococcaceaeUCG003.id.11361	C/T	T	-0.00562	0.01363	-0.4614	0.644368	13851	24	0.0177	0.0024	T	0.2833	-0.00562
3:117509984	genus.RuminococcaceaeUCG005.id.11363	C/T	T	-0.01461	0.01283	-1.1388	0.254787	15602	24	0.0177	0.0024	T	0.2833	-0.01461
3:117509984	genus.Sellimonas.id.14369	C/T	T	0.01316	0.02808	0.4766	0.633647	3201	22	0.0177	0.0024	T	0.2833	0.01316
3:117509984	genus.Subdoligranulum.id.2070	C/T	T	-0.00713	0.01233	-0.5588	0.576298	16945	24	0.0177	0.0024	T	0.2833	-0.00713
3:157977962	family.Ruminococcaceae.id.2050	C/T	C	-0.00223	0.01054	-0.2178	0.827429	18468	25	-0.0285	0.0022	T	0.5799	0.00223
3:157977962	genus..Eubacteriumventriosumgroup.id.11341	C/T	C	0.02713	0.01153	2.3509	0.0187331	15421	25	-0.0285	0.0022	T	0.5799	-0.02713
3:157977962	genus..Ruminococcusgauvreauiigroup.id.11342	C/T	C	-0.02579	0.01231	-2.1051	0.0352739	13515	25	-0.0285	0.0022	T	0.5799	0.02579
3:157977962	genus.Coprococcus3.id.11303	C/T	C	0.00993	0.01133	0.8651	0.387039	15968	25	-0.0285	0.0022	T	0.5799	-0.00993
3:157977962	genus.Eggerthella.id.819	C/T	C	-0.0024	0.01985	-0.1124	0.910506	5203	23	-0.0285	0.0022	T	0.5799	0.0024
3:157977962	genus.Hungatella.id.11306	C/T	C	0.00266	0.02191	0.1141	0.909238	4279	23	-0.0285	0.0022	T	0.5799	-0.00266
3:157977962	genus.Lachnoclostridium.id.11308	C/T	C	0.00179	0.01066	0.1758	0.860608	18055	25	-0.0285	0.0022	T	0.5799	-0.00179
3:157977962	genus.LachnospiraceaeUCG001.id.11321	C/T	C	0.00776	0.01414	0.5577	0.577118	10258	25	-0.0285	0.0022	T	0.5799	-0.00776
3:157977962	genus.RuminococcaceaeUCG002.id.11360	C/T	C	-0.00127	0.01091	-0.1167	0.907019	17230	25	-0.0285	0.0022	T	0.5799	0.00127
3:157977962	genus.RuminococcaceaeUCG003.id.11361	C/T	C	0.0257	0.01188	2.1638	0.0304951	14534	25	-0.0285	0.0022	T	0.5799	-0.0257
3:157977962	genus.RuminococcaceaeUCG005.id.11363	C/T	C	0.00076	0.01124	0.0737	0.941329	16236	25	-0.0285	0.0022	T	0.5799	-0.00076
3:157977962	genus.Sellimonas.id.14369	C/T	C	0.01734	0.02525	0.687	0.492083	3202	22	-0.0285	0.0022	T	0.5799	-0.01734
3:157977962	genus.Subdoligranulum.id.2070	C/T	C	0.00374	0.01076	0.3348	0.737927	17724	25	-0.0285	0.0022	T	0.5799	-0.00374
3:44736493	family.Ruminococcaceae.id.2050	T/C	C	0.0136	0.06685	0.1904	0.849152	590	2	-0.0163	0.0024	T	0.696	-0.0136
3:44736493	genus..Eubacteriumventriosumgroup.id.11341	T/C	C	-0.01392	0.07667	-0.1725	0.862966	450	2	-0.0163	0.0024	T	0.696	0.01392
3:44736493	genus..Ruminococcusgauvreauiigroup.id.11342	T/C	C	-0.03954	0.0741	-0.5822	0.560297	479	2	-0.0163	0.0024	T	0.696	0.03954
3:44736493	genus.Coprococcus3.id.11303	T/C	C	0.05723	0.07609	0.7784	0.436451	453	2	-0.0163	0.0024	T	0.696	-0.05723
3:44736493	genus.Eggerthella.id.819	T/C	C	0.31294	0.18609	1.6817	0.0926464	64	1	-0.0163	0.0024	T	0.696	-0.31294
3:44736493	genus.Hungatella.id.11306	T/C	C	0.04674	0.09388	0.4408	0.659358	297	2	-0.0163	0.0024	T	0.696	-0.04674
3:44736493	genus.Lachnoclostridium.id.11308	T/C	C	0.00339	0.06888	0.0297	0.976386	554	2	-0.0163	0.0024	T	0.696	-0.00339
3:44736493	genus.LachnospiraceaeUCG001.id.11321	T/C	C	-0.00422	0.10456	-0.0484	0.961397	240	2	-0.0163	0.0024	T	0.696	0.00422
3:44736493	genus.RuminococcaceaeUCG002.id.11360	T/C	C	0.04926	0.07025	0.6901	0.490194	535	2	-0.0163	0.0024	T	0.696	-0.04926
3:44736493	genus.RuminococcaceaeUCG003.id.11361	T/C	C	0.0062	0.07318	0.1147	0.908762	493	2	-0.0163	0.0024	T	0.696	-0.0062
3:44736493	genus.RuminococcaceaeUCG005.id.11363	T/C	C	0.05525	0.08373	0.6666	0.505028	372	2	-0.0163	0.0024	T	0.696	-0.05525
3:44736493	genus.Sellimonas.id.14369	T/C	C	0.18104	0.14894	1.0531	0.292341	106	2	-0.0163	0.0024	T	0.696	-0.18104
3:44736493	genus.Subdoligranulum.id.2070	T/C	C	-0.04554	0.07042	-0.597	0.550507	529	2	-0.0163	0.0024	T	0.696	0.04554
3:49214066	family.Ruminococcaceae.id.2050	A/G	G	0.01531	0.01281	1.14	0.25437	17657	24	-0.0217	0.0025	A	0.774	-0.01531
3:49214066	genus..Eubacteriumventriosumgroup.id.11341	A/G	G	-0.01067	0.01397	-0.9118	0.361874	14712	24	-0.0217	0.0025	A	0.774	0.01067
3:49214066	genus..Ruminococcusgauvreauiigroup.id.11342	A/G	G	-0.01294	0.01492	-0.7958	0.426148	12972	24	-0.0217	0.0025	A	0.774	0.01294
3:49214066	genus.Coprococcus3.id.11303	A/G	G	0.01357	0.01375	1.0533	0.292249	15288	24	-0.0217	0.0025	A	0.774	-0.01357
3:49214066	genus.Eggerthella.id.819	A/G	G	0.01582	0.02393	0.7134	0.475722	4962	22	-0.0217	0.0025	A	0.774	-0.01582
3:49214066	genus.Hungatella.id.11306	A/G	G	0.00739	0.02656	0.3086	0.757626	4079	22	-0.0217	0.0025	A	0.774	-0.00739
3:49214066	genus.Lachnoclostridium.id.11308	A/G	G	-0.0167	0.01296	-1.3083	0.190738	17246	24	-0.0217	0.0025	A	0.774	0.0167
3:49214066	genus.LachnospiraceaeUCG001.id.11321	A/G	G	-0.00066	0.01692	-0.0543	0.956616	10026	24	-0.0217	0.0025	A	0.774	0.00066
3:49214066	genus.RuminococcaceaeUCG002.id.11360	A/G	G	-0.00136	0.01323	-0.081	0.935283	16509	24	-0.0217	0.0025	A	0.774	0.00136
3:49214066	genus.RuminococcaceaeUCG003.id.11361	A/G	G	0.00096	0.01446	-0.0123	0.990106	13859	24	-0.0217	0.0025	A	0.774	-0.00096
3:49214066	genus.RuminococcaceaeUCG005.id.11363	A/G	G	0.00702	0.0136	0.4784	0.632366	15607	24	-0.0217	0.0025	A	0.774	-0.00702
3:49214066	genus.Sellimonas.id.14369	A/G	G	-0.06185	0.02975	-1.9833	0.0473228	3202	22	-0.0217	0.0025	A	0.774	0.06185
3:49214066	genus.Subdoligranulum.id.2070	A/G	G	0.02212	0.01307	1.6356	0.101965	16953	24	-0.0217	0.0025	A	0.774	-0.02212
3:61192911	family.Ruminococcaceae.id.2050	A/G	A	0.01779	0.05976	0.2992	0.764787	591	2	0.0179	0.0022	A	0.388	0.01779
3:61192911	genus..Eubacteriumventriosumgroup.id.11341	A/G	A	-0.00441	0.0684	-0.0736	0.94117	451	2	0.0179	0.0022	A	0.388	-0.00441
3:61192911	genus..Ruminococcusgauvreauiigroup.id.11342	A/G	A	0.01846	0.06628	0.2887	0.772887	480	2	0.0179	0.0022	A	0.388	0.01846
3:61192911	genus.Coprococcus3.id.11303	A/G	A	-0.0658	0.06779	-0.9303	0.352164	454	2	0.0179	0.0022	A	0.388	-0.0658
3:61192911	genus.Eggerthella.id.819	A/G	A	-0.08104	0.17804	-0.4552	0.648822	64	1	0.0179	0.0022	A	0.388	-0.08104
3:61192911	genus.Hungatella.id.11306	A/G	A	-0.00119	0.08427	-0.0187	0.985001	297	2	0.0179	0.0022	A	0.388	-0.00119
3:61192911	genus.Lachnoclostridium.id.11308	A/G	A	-0.08826	0.06153	-1.4345	0.151401	555	2	0.0179	0.0022	A	0.388	-0.08826
3:61192911	genus.LachnospiraceaeUCG001.id.11321	A/G	A	0.11456	0.09335	1.2256	0.220425	240	2	0.0179	0.0022	A	0.388	0.11456
3:61192911	genus.RuminococcaceaeUCG002.id.11360	A/G	A	-0.03631	0.06275	-0.5782	0.563129	536	2	0.0179	0.0022	A	0.388	-0.03631
3:61192911	genus.RuminococcaceaeUCG003.id.11361	A/G	A	0.01707	0.06538	0.2682	0.788699	494	2	0.0179	0.0022	A	0.388	0.01707
3:61192911	genus.RuminococcaceaeUCG005.id.11363	A/G	A	0.0854	0.07489	1.151	0.249732	373	2	0.0179	0.0022	A	0.388	0.0854
3:61192911	genus.Sellimonas.id.14369	A/G	A	0.13184	0.13672	0.9	0.368227	107	2	0.0179	0.0022	A	0.388	0.13184
3:61192911	genus.Subdoligranulum.id.2070	A/G	A	-0.04854	0.06309	-0.7661	0.443557	529	2	0.0179	0.0022	A	0.388	-0.04854
4:123186393	family.Ruminococcaceae.id.2050	A/G	G	0.00094	0.02763	0.0961	0.923521	12541	14	0.0463	0.0049	A	0.9472	-0.00094
4:123186393	genus..Eubacteriumventriosumgroup.id.11341	A/G	G	-0.01986	0.02989	-0.7277	0.466736	10691	14	0.0463	0.0049	A	0.9472	0.01986
4:123186393	genus..Ruminococcusgauvreauiigroup.id.11342	A/G	G	0.02029	0.03238	0.6708	0.502475	9065	14	0.0463	0.0049	A	0.9472	-0.02029
4:123186393	genus.Coprococcus3.id.11303	A/G	G	0.03749	0.02949	1.2449	0.213205	10989	14	0.0463	0.0049	A	0.9472	-0.03749
4:123186393	genus.Eggerthella.id.819	A/G	G	-0.03708	0.05269	-0.6906	0.489691	3439	14	0.0463	0.0049	A	0.9472	0.03708
4:123186393	genus.Hungatella.id.11306	A/G	G	0.05376	0.06521	0.8293	0.406991	2190	13	0.0463	0.0049	A	0.9472	-0.05376
4:123186393	genus.Lachnoclostridium.id.11308	A/G	G	-0.01437	0.02795	-0.5344	0.592926	12249	14	0.0463	0.0049	A	0.9472	0.01437
4:123186393	genus.LachnospiraceaeUCG001.id.11321	A/G	G	0.02023	0.03557	0.5096	0.610472	7543	14	0.0463	0.0049	A	0.9472	-0.02023
4:123186393	genus.RuminococcaceaeUCG002.id.11360	A/G	G	0.01245	0.02846	0.5023	0.615527	11817	14	0.0463	0.0049	A	0.9472	-0.01245
4:123186393	genus.RuminococcaceaeUCG003.id.11361	A/G	G	0.01922	0.03139	0.6246	0.532234	9718	14	0.0463	0.0049	A	0.9472	-0.01922
4:123186393	genus.RuminococcaceaeUCG005.id.11363	A/G	G	-0.04445	0.029	-1.4781	0.139354	11369	14	0.0463	0.0049	A	0.9472	0.04445
4:123186393	genus.Sellimonas.id.14369	A/G	G	0.02326	0.06335	0.3182	0.750333	2370	13	0.0463	0.0049	A	0.9472	-0.02326
4:123186393	genus.Subdoligranulum.id.2070	A/G	G	-0.01343	0.02811	-0.5133	0.607672	12115	14	0.0463	0.0049	A	0.9472	0.01343
4:3207142	family.Ruminococcaceae.id.2050	A/G	G	0.00428	0.01053	0.4145	0.678581	18465	25	0.0173	0.0022	A	0.5753	-0.00428
4:3207142	genus..Eubacteriumventriosumgroup.id.11341	A/G	G	0.0108	0.01151	0.9488	0.342722	15419	25	0.0173	0.0022	A	0.5753	-0.0108
4:3207142	genus..Ruminococcusgauvreauiigroup.id.11342	A/G	G	0.00917	0.01229	0.745	0.456393	13513	25	0.0173	0.0022	A	0.5753	-0.00917
4:3207142	genus.Coprococcus3.id.11303	A/G	G	0.02655	0.01132	2.3423	0.0191704	15966	25	0.0173	0.0022	A	0.5753	-0.02655
4:3207142	genus.Eggerthella.id.819	A/G	G	-0.0044	0.01983	-0.2202	0.825715	5203	23	0.0173	0.0022	A	0.5753	0.0044
4:3207142	genus.Hungatella.id.11306	A/G	G	-0.00887	0.02183	-0.3857	0.699645	4278	23	0.0173	0.0022	A	0.5753	0.00887
4:3207142	genus.Lachnoclostridium.id.11308	A/G	G	0.00679	0.01065	0.6325	0.527126	18052	25	0.0173	0.0022	A	0.5753	-0.00679
4:3207142	genus.LachnospiraceaeUCG001.id.11321	A/G	G	0.00916	0.01413	0.65	0.515821	10257	25	0.0173	0.0022	A	0.5753	-0.00916
4:3207142	genus.RuminococcaceaeUCG002.id.11360	A/G	G	-0.00993	0.0109	-0.9132	0.361032	17227	25	0.0173	0.0022	A	0.5753	0.00993
4:3207142	genus.RuminococcaceaeUCG003.id.11361	A/G	G	-0.01438	0.01187	-1.2091	0.226586	14531	25	0.0173	0.0022	A	0.5753	0.01438
4:3207142	genus.RuminococcaceaeUCG005.id.11363	A/G	G	-0.00572	0.01123	-0.5036	0.614542	16234	25	0.0173	0.0022	A	0.5753	0.00572
4:3207142	genus.Sellimonas.id.14369	A/G	G	-0.01705	0.02527	-0.6679	0.504134	3202	22	0.0173	0.0022	A	0.5753	0.01705
4:3207142	genus.Subdoligranulum.id.2070	A/G	G	0.00136	0.01075	0.13	0.896566	17721	25	0.0173	0.0022	A	0.5753	-0.00136
4:42110353	family.Ruminococcaceae.id.2050	T/C	C	-0.00757	0.01681	-0.3976	0.690778	17652	24	0.0244	0.0034	T	0.8838	0.00757
4:42110353	genus..Eubacteriumventriosumgroup.id.11341	T/C	C	0.0178	0.01835	0.9889	0.322761	14708	24	0.0244	0.0034	T	0.8838	-0.0178
4:42110353	genus..Ruminococcusgauvreauiigroup.id.11342	T/C	C	0.02775	0.01955	1.4235	0.15462	12968	24	0.0244	0.0034	T	0.8838	-0.02775
4:42110353	genus.Coprococcus3.id.11303	T/C	C	0.00601	0.01804	0.3931	0.694319	15284	24	0.0244	0.0034	T	0.8838	-0.00601
4:42110353	genus.Eggerthella.id.819	T/C	C	-0.04622	0.0315	-1.4473	0.147785	4962	22	0.0244	0.0034	T	0.8838	0.04622
4:42110353	genus.Hungatella.id.11306	T/C	C	0.07314	0.03494	2.0689	0.0385649	4077	22	0.0244	0.0034	T	0.8838	-0.07314
4:42110353	genus.Lachnoclostridium.id.11308	T/C	C	0.03636	0.017	2.0742	0.0380607	17241	24	0.0244	0.0034	T	0.8838	-0.03636
4:42110353	genus.LachnospiraceaeUCG001.id.11321	T/C	C	0.02278	0.02223	1.0116	0.311825	10024	24	0.0244	0.0034	T	0.8838	-0.02278
4:42110353	genus.RuminococcaceaeUCG002.id.11360	T/C	C	-0.02142	0.01737	-1.2164	0.223833	16504	24	0.0244	0.0034	T	0.8838	0.02142
4:42110353	genus.RuminococcaceaeUCG003.id.11361	T/C	C	-0.03046	0.01896	-1.5713	0.11609	13855	24	0.0244	0.0034	T	0.8838	0.03046
4:42110353	genus.RuminococcaceaeUCG005.id.11363	T/C	C	-0.01512	0.01785	-0.8093	0.418285	15604	24	0.0244	0.0034	T	0.8838	0.01512
4:42110353	genus.Sellimonas.id.14369	T/C	C	0.05544	0.03925	1.3714	0.17025	3201	22	0.0244	0.0034	T	0.8838	-0.05544
4:42110353	genus.Subdoligranulum.id.2070	T/C	C	0.00501	0.01715	0.3005	0.763872	16949	24	0.0244	0.0034	T	0.8838	-0.00501
5:103972357	family.Ruminococcaceae.id.2050	G/A	A	0.00122	0.01133	0.1907	0.848839	18463	25	0.0323	0.0023	A	0.3296	0.00122
5:103972357	genus..Eubacteriumventriosumgroup.id.11341	G/A	A	0.00345	0.01232	0.4187	0.675508	15417	25	0.0323	0.0023	A	0.3296	0.00345
5:103972357	genus..Ruminococcusgauvreauiigroup.id.11342	G/A	A	0.00207	0.01319	0.2052	0.837572	13511	25	0.0323	0.0023	A	0.3296	0.00207
5:103972357	genus.Coprococcus3.id.11303	G/A	A	-0.00299	0.01215	-0.1221	0.902741	15964	25	0.0323	0.0023	A	0.3296	-0.00299
5:103972357	genus.Eggerthella.id.819	G/A	A	-0.0332	0.02114	-1.6382	0.10138	5203	23	0.0323	0.0023	A	0.3296	-0.0332
5:103972357	genus.Hungatella.id.11306	G/A	A	-0.03944	0.02334	-1.7239	0.0847078	4277	23	0.0323	0.0023	A	0.3296	-0.03944
5:103972357	genus.Lachnoclostridium.id.11308	G/A	A	-0.00176	0.01146	-0.0178	0.985798	18050	25	0.0323	0.0023	A	0.3296	-0.00176
5:103972357	genus.LachnospiraceaeUCG001.id.11321	G/A	A	0.01144	0.01501	0.815	0.415072	10256	25	0.0323	0.0023	A	0.3296	0.01144
5:103972357	genus.RuminococcaceaeUCG002.id.11360	G/A	A	0.00524	0.01171	0.3022	0.7625	17225	25	0.0323	0.0023	A	0.3296	0.00524
5:103972357	genus.RuminococcaceaeUCG003.id.11361	G/A	A	-0.00053	0.01276	-0.1519	0.879187	14530	25	0.0323	0.0023	A	0.3296	-0.00053
5:103972357	genus.RuminococcaceaeUCG005.id.11363	G/A	A	0.01008	0.01204	0.8498	0.395436	16233	25	0.0323	0.0023	A	0.3296	0.01008
5:103972357	genus.Sellimonas.id.14369	G/A	A	-0.04995	0.02653	-1.9661	0.0492755	3201	22	0.0323	0.0023	A	0.3296	-0.04995
5:103972357	genus.Subdoligranulum.id.2070	G/A	A	-0.0212	0.01156	-1.718	0.0857966	17720	25	0.0323	0.0023	A	0.3296	-0.0212
5:164523472	family.Ruminococcaceae.id.2050	C/A	A	0.00682	0.01062	0.6423	0.520743	18462	25	-0.025	0.0022	A	0.4713	0.00682
5:164523472	genus..Eubacteriumventriosumgroup.id.11341	C/A	A	-0.00703	0.01161	-0.5941	0.552378	15416	25	-0.025	0.0022	A	0.4713	-0.00703
5:164523472	genus..Ruminococcusgauvreauiigroup.id.11342	C/A	A	0.00734	0.0124	0.5827	0.560163	13510	25	-0.025	0.0022	A	0.4713	0.00734
5:164523472	genus.Coprococcus3.id.11303	C/A	A	0.00394	0.01141	0.3127	0.754585	15963	25	-0.025	0.0022	A	0.4713	0.00394
5:164523472	genus.Eggerthella.id.819	C/A	A	-0.06138	0.01988	-3.0619	0.00219863	5203	23	-0.025	0.0022	A	0.4713	-0.06138
5:164523472	genus.Hungatella.id.11306	C/A	A	-0.02482	0.02196	-1.0902	0.275537	4276	23	-0.025	0.0022	A	0.4713	-0.02482
5:164523472	genus.Lachnoclostridium.id.11308	C/A	A	0.00446	0.01074	0.4543	0.649685	18049	25	-0.025	0.0022	A	0.4713	0.00446
5:164523472	genus.LachnospiraceaeUCG001.id.11321	C/A	A	-0.00613	0.01416	-0.4285	0.668214	10256	25	-0.025	0.0022	A	0.4713	-0.00613
5:164523472	genus.RuminococcaceaeUCG002.id.11360	C/A	A	-0.01425	0.01098	-1.2991	0.193875	17224	25	-0.025	0.0022	A	0.4713	-0.01425
5:164523472	genus.RuminococcaceaeUCG003.id.11361	C/A	A	0.01839	0.01197	1.4673	0.142322	14529	25	-0.025	0.0022	A	0.4713	0.01839
5:164523472	genus.RuminococcaceaeUCG005.id.11363	C/A	A	0.00396	0.0113	0.4339	0.664434	16232	25	-0.025	0.0022	A	0.4713	0.00396
5:164523472	genus.Sellimonas.id.14369	C/A	A	-0.00071	0.02511	-0.0442	0.964745	3201	22	-0.025	0.0022	A	0.4713	-0.00071
5:164523472	genus.Subdoligranulum.id.2070	C/A	A	0.01237	0.01084	1.0842	0.278276	17719	25	-0.025	0.0022	A	0.4713	0.01237
5:61509655	family.Ruminococcaceae.id.2050	C/T	T	-0.01888	0.01045	-1.8187	0.068942	18448	25	0.0205	0.0022	T	0.515	-0.01888
5:61509655	genus..Eubacteriumventriosumgroup.id.11341	C/T	T	-0.00183	0.01143	-0.1686	0.865954	15405	25	0.0205	0.0022	T	0.515	-0.00183
5:61509655	genus..Ruminococcusgauvreauiigroup.id.11342	C/T	T	0.00426	0.0122	0.3507	0.725888	13499	25	0.0205	0.0022	T	0.515	0.00426
5:61509655	genus.Coprococcus3.id.11303	C/T	T	0.007	0.01123	0.589	0.555861	15953	25	0.0205	0.0022	T	0.515	0.007
5:61509655	genus.Eggerthella.id.819	C/T	T	0.02406	0.01965	1.2208	0.222238	5203	23	0.0205	0.0022	T	0.515	0.02406
5:61509655	genus.Hungatella.id.11306	C/T	T	-0.01705	0.02169	-0.7737	0.439049	4269	23	0.0205	0.0022	T	0.515	-0.01705
5:61509655	genus.Lachnoclostridium.id.11308	C/T	T	0.00262	0.01057	0.251	0.801814	18036	25	0.0205	0.0022	T	0.515	0.00262
5:61509655	genus.LachnospiraceaeUCG001.id.11321	C/T	T	0.00107	0.01398	0.0702	0.944194	10250	25	0.0205	0.0022	T	0.515	0.00107
5:61509655	genus.RuminococcaceaeUCG002.id.11360	C/T	T	-0.00511	0.01081	-0.4819	0.629806	17211	25	0.0205	0.0022	T	0.515	-0.00511
5:61509655	genus.RuminococcaceaeUCG003.id.11361	C/T	T	0.00725	0.01177	0.6072	0.543718	14517	25	0.0205	0.0022	T	0.515	0.00725
5:61509655	genus.RuminococcaceaeUCG005.id.11363	C/T	T	-0.00131	0.01113	-0.0855	0.931784	16224	25	0.0205	0.0022	T	0.515	-0.00131
5:61509655	genus.Sellimonas.id.14369	C/T	T	0.03138	0.02491	1.2543	0.209769	3200	22	0.0205	0.0022	T	0.515	0.03138
5:61509655	genus.Subdoligranulum.id.2070	C/T	T	-0.00891	0.01066	-0.8489	0.395881	17706	25	0.0205	0.0022	T	0.515	-0.00891
5:87545318	family.Ruminococcaceae.id.2050	C/T	C	-0.00724	0.01048	-0.7143	0.47498	18468	25	-0.0208	0.0022	T	0.5288	0.00724
5:87545318	genus..Eubacteriumventriosumgroup.id.11341	C/T	C	-0.00272	0.01147	-0.2384	0.811571	15421	25	-0.0208	0.0022	T	0.5288	0.00272
5:87545318	genus..Ruminococcusgauvreauiigroup.id.11342	C/T	C	-0.01471	0.01226	-1.1925	0.233026	13515	25	-0.0208	0.0022	T	0.5288	0.01471
5:87545318	genus.Coprococcus3.id.11303	C/T	C	-0.0016	0.01127	-0.1619	0.871306	15968	25	-0.0208	0.0022	T	0.5288	0.0016
5:87545318	genus.Eggerthella.id.819	C/T	C	0.03245	0.01971	1.6369	0.101672	5203	23	-0.0208	0.0022	T	0.5288	-0.03245
5:87545318	genus.Hungatella.id.11306	C/T	C	0.00835	0.02178	0.3931	0.694319	4279	23	-0.0208	0.0022	T	0.5288	-0.00835
5:87545318	genus.Lachnoclostridium.id.11308	C/T	C	-0.00739	0.0106	-0.7185	0.472387	18055	25	-0.0208	0.0022	T	0.5288	0.00739
5:87545318	genus.LachnospiraceaeUCG001.id.11321	C/T	C	0.00055	0.01404	0.0293	0.976705	10258	25	-0.0208	0.0022	T	0.5288	-0.00055
5:87545318	genus.RuminococcaceaeUCG002.id.11360	C/T	C	0.00145	0.01085	0.1206	0.904166	17230	25	-0.0208	0.0022	T	0.5288	-0.00145
5:87545318	genus.RuminococcaceaeUCG003.id.11361	C/T	C	-0.02252	0.01182	-1.8957	0.0579865	14534	25	-0.0208	0.0022	T	0.5288	0.02252
5:87545318	genus.RuminococcaceaeUCG005.id.11363	C/T	C	-0.00182	0.01117	-0.1612	0.871936	16236	25	-0.0208	0.0022	T	0.5288	0.00182
5:87545318	genus.Sellimonas.id.14369	C/T	C	-0.00019	0.02503	-0.0186	0.98516	3202	22	-0.0208	0.0022	T	0.5288	0.00019
5:87545318	genus.Subdoligranulum.id.2070	C/T	C	-0.01052	0.0107	-1.0014	0.316537	17724	25	-0.0208	0.0022	T	0.5288	0.01052
5:93071630	family.Ruminococcaceae.id.2050	G/C	C	0.00815	0.01281	0.5828	0.560028	18468	25	-0.025	0.0026	C	0.2212	0.00815
5:93071630	genus..Eubacteriumventriosumgroup.id.11341	G/C	C	-0.00795	0.01402	-0.4503	0.652422	15421	25	-0.025	0.0026	C	0.2212	-0.00795
5:93071630	genus..Ruminococcusgauvreauiigroup.id.11342	G/C	C	4e-05	0.01493	-0.0489	0.960919	13515	25	-0.025	0.0026	C	0.2212	4e-05
5:93071630	genus.Coprococcus3.id.11303	G/C	C	-0.00395	0.01378	-0.2843	0.776104	15968	25	-0.025	0.0026	C	0.2212	-0.00395
5:93071630	genus.Eggerthella.id.819	G/C	C	-0.00321	0.02384	-0.1723	0.863123	5203	23	-0.025	0.0026	C	0.2212	-0.00321
5:93071630	genus.Hungatella.id.11306	G/C	C	0.01059	0.02607	0.4356	0.663127	4279	23	-0.025	0.0026	C	0.2212	0.01059
5:93071630	genus.Lachnoclostridium.id.11308	G/C	C	0.01515	0.01295	1.1505	0.249979	18055	25	-0.025	0.0026	C	0.2212	0.01515
5:93071630	genus.LachnospiraceaeUCG001.id.11321	G/C	C	-0.01734	0.01721	-0.8923	0.372179	10258	25	-0.025	0.0026	C	0.2212	-0.01734
5:93071630	genus.RuminococcaceaeUCG002.id.11360	G/C	C	0.01022	0.01326	0.8126	0.416562	17230	25	-0.025	0.0026	C	0.2212	0.01022
5:93071630	genus.RuminococcaceaeUCG003.id.11361	G/C	C	-0.00484	0.01443	-0.3239	0.745938	14534	25	-0.025	0.0026	C	0.2212	-0.00484
5:93071630	genus.RuminococcaceaeUCG005.id.11363	G/C	C	0.00287	0.01367	0.2498	0.802742	16236	25	-0.025	0.0026	C	0.2212	0.00287
5:93071630	genus.Sellimonas.id.14369	G/C	C	0.00847	0.0305	0.4426	0.658055	3202	22	-0.025	0.0026	C	0.2212	0.00847
5:93071630	genus.Subdoligranulum.id.2070	G/C	C	0.00681	0.01308	0.493	0.622013	17724	25	-0.025	0.0026	C	0.2212	0.00681
6:101387304	family.Ruminococcaceae.id.2050	T/A	A	-0.00554	0.01067	-0.5355	0.592235	18455	25	-0.0165	0.0022	A	0.4051	-0.00554
6:101387304	genus..Eubacteriumventriosumgroup.id.11341	T/A	A	-0.01344	0.01167	-1.1384	0.25487	15411	25	-0.0165	0.0022	A	0.4051	-0.01344
6:101387304	genus..Ruminococcusgauvreauiigroup.id.11342	T/A	A	-0.00808	0.01247	-0.6599	0.509254	13504	25	-0.0165	0.0022	A	0.4051	-0.00808
6:101387304	genus.Coprococcus3.id.11303	T/A	A	-0.01502	0.01147	-1.2998	0.193601	15958	25	-0.0165	0.0022	A	0.4051	-0.01502
6:101387304	genus.Eggerthella.id.819	T/A	A	0.03619	0.02009	1.8582	0.063169	5203	23	-0.0165	0.0022	A	0.4051	0.03619
6:101387304	genus.Hungatella.id.11306	T/A	A	0.00099	0.02217	0.0795	0.936714	4273	23	-0.0165	0.0022	A	0.4051	0.00099
6:101387304	genus.Lachnoclostridium.id.11308	T/A	A	0.00519	0.01079	0.5034	0.614824	18043	25	-0.0165	0.0022	A	0.4051	0.00519
6:101387304	genus.LachnospiraceaeUCG001.id.11321	T/A	A	0.00559	0.0143	0.3906	0.696241	10253	25	-0.0165	0.0022	A	0.4051	0.00559
6:101387304	genus.RuminococcaceaeUCG002.id.11360	T/A	A	-0.01191	0.01104	-1.077	0.28148	17218	25	-0.0165	0.0022	A	0.4051	-0.01191
6:101387304	genus.RuminococcaceaeUCG003.id.11361	T/A	A	0.00186	0.01203	0.1102	0.912251	14523	25	-0.0165	0.0022	A	0.4051	0.00186
6:101387304	genus.RuminococcaceaeUCG005.id.11363	T/A	A	-0.00406	0.01138	-0.3783	0.705133	16228	25	-0.0165	0.0022	A	0.4051	-0.00406
6:101387304	genus.Sellimonas.id.14369	T/A	A	0.07296	0.02549	2.8551	0.00430368	3200	22	-0.0165	0.0022	A	0.4051	0.07296
6:101387304	genus.Subdoligranulum.id.2070	T/A	A	-0.01471	0.01089	-1.4016	0.160975	17712	25	-0.0165	0.0022	A	0.4051	-0.01471
6:105365891	family.Ruminococcaceae.id.2050	C/G	C	0.01303	0.01053	1.2163	0.223909	18467	25	-0.0198	0.0022	C	0.4536	0.01303
6:105365891	genus..Eubacteriumventriosumgroup.id.11341	C/G	C	-0.01124	0.01152	-1.0004	0.31702	15420	25	-0.0198	0.0022	C	0.4536	-0.01124
6:105365891	genus..Ruminococcusgauvreauiigroup.id.11342	C/G	C	-0.01918	0.0123	-1.5509	0.120902	13514	25	-0.0198	0.0022	C	0.4536	-0.01918
6:105365891	genus.Coprococcus3.id.11303	C/G	C	0.00413	0.01132	0.3262	0.744424	15967	25	-0.0198	0.0022	C	0.4536	0.00413
6:105365891	genus.Eggerthella.id.819	C/G	C	0.00975	0.01981	0.5236	0.600696	5203	23	-0.0198	0.0022	C	0.4536	0.00975
6:105365891	genus.Hungatella.id.11306	C/G	C	0.00591	0.02183	0.2848	0.775951	4279	23	-0.0198	0.0022	C	0.4536	0.00591
6:105365891	genus.Lachnoclostridium.id.11308	C/G	C	0.0147	0.01065	1.3787	0.168018	18054	25	-0.0198	0.0022	C	0.4536	0.0147
6:105365891	genus.LachnospiraceaeUCG001.id.11321	C/G	C	0.02466	0.01409	1.7646	0.0776647	10258	25	-0.0198	0.0022	C	0.4536	0.02466
6:105365891	genus.RuminococcaceaeUCG002.id.11360	C/G	C	0.00792	0.0109	0.7107	0.477332	17229	25	-0.0198	0.0022	C	0.4536	0.00792
6:105365891	genus.RuminococcaceaeUCG003.id.11361	C/G	C	-0.00805	0.01187	-0.6852	0.493092	14533	25	-0.0198	0.0022	C	0.4536	-0.00805
6:105365891	genus.RuminococcaceaeUCG005.id.11363	C/G	C	0.00669	0.01123	0.6151	0.538555	16235	25	-0.0198	0.0022	C	0.4536	0.00669
6:105365891	genus.Sellimonas.id.14369	C/G	C	-0.01521	0.02508	-0.6207	0.534731	3202	22	-0.0198	0.0022	C	0.4536	-0.01521
6:105365891	genus.Subdoligranulum.id.2070	C/G	C	-0.00747	0.01075	-0.7209	0.47091	17723	25	-0.0198	0.0022	C	0.4536	-0.00747
6:142996618	family.Ruminococcaceae.id.2050	C/G	G	0.00813	0.01064	0.7627	0.445702	17987	24	-0.0187	0.0022	C	0.5271	-0.00813
6:142996618	genus..Eubacteriumventriosumgroup.id.11341	C/G	G	0.00612	0.01163	0.5242	0.600139	15045	24	-0.0187	0.0022	C	0.5271	-0.00612
6:142996618	genus..Ruminococcusgauvreauiigroup.id.11342	C/G	G	0.0054	0.01245	0.416	0.67741	13119	24	-0.0187	0.0022	C	0.5271	-0.0054
6:142996618	genus.Coprococcus3.id.11303	C/G	G	-0.00057	0.01142	-0.0863	0.931148	15605	24	-0.0187	0.0022	C	0.5271	0.00057
6:142996618	genus.Eggerthella.id.819	C/G	G	0.0088	0.01975	0.4512	0.65199	5203	23	-0.0187	0.0022	C	0.5271	-0.0088
6:142996618	genus.Hungatella.id.11306	C/G	G	0.01159	0.02241	0.5361	0.591959	4039	22	-0.0187	0.0022	C	0.5271	-0.01159
6:142996618	genus.Lachnoclostridium.id.11308	C/G	G	-0.01152	0.01076	-1.1112	0.266396	17610	24	-0.0187	0.0022	C	0.5271	0.01152
6:142996618	genus.LachnospiraceaeUCG001.id.11321	C/G	G	-0.01593	0.01416	-1.0943	0.27378	10069	24	-0.0187	0.0022	C	0.5271	0.01593
6:142996618	genus.RuminococcaceaeUCG002.id.11360	C/G	G	0.00042	0.01101	0.0989	0.921297	16784	24	-0.0187	0.0022	C	0.5271	-0.00042
6:142996618	genus.RuminococcaceaeUCG003.id.11361	C/G	G	-0.00573	0.01201	-0.5063	0.612576	14126	24	-0.0187	0.0022	C	0.5271	0.00573
6:142996618	genus.RuminococcaceaeUCG005.id.11363	C/G	G	0.00268	0.01129	0.2186	0.827117	15954	24	-0.0187	0.0022	C	0.5271	-0.00268
6:142996618	genus.Sellimonas.id.14369	C/G	G	-0.00268	0.02524	-0.1104	0.911934	3143	21	-0.0187	0.0022	C	0.5271	0.00268
6:142996618	genus.Subdoligranulum.id.2070	C/G	G	0.01366	0.01085	1.3023	0.192848	17298	24	-0.0187	0.0022	C	0.5271	-0.01366
6:165121844	family.Ruminococcaceae.id.2050	A/T	A	0.0168	0.01053	1.5909	0.111655	18468	25	-0.0184	0.0022	A	0.4534	0.0168
6:165121844	genus..Eubacteriumventriosumgroup.id.11341	A/T	A	-0.00885	0.01152	-0.7642	0.444748	15421	25	-0.0184	0.0022	A	0.4534	-0.00885
6:165121844	genus..Ruminococcusgauvreauiigroup.id.11342	A/T	A	-0.00268	0.0123	-0.1527	0.878556	13515	25	-0.0184	0.0022	A	0.4534	-0.00268
6:165121844	genus.Coprococcus3.id.11303	A/T	A	0.02093	0.01133	1.8876	0.0590797	15968	25	-0.0184	0.0022	A	0.4534	0.02093
6:165121844	genus.Eggerthella.id.819	A/T	A	-0.00421	0.01982	-0.2727	0.785007	5203	23	-0.0184	0.0022	A	0.4534	-0.00421
6:165121844	genus.Hungatella.id.11306	A/T	A	-0.02044	0.02189	-0.9804	0.32679	4279	23	-0.0184	0.0022	A	0.4534	-0.02044
6:165121844	genus.Lachnoclostridium.id.11308	A/T	A	-0.00862	0.01066	-0.787	0.431282	18055	25	-0.0184	0.0022	A	0.4534	-0.00862
6:165121844	genus.LachnospiraceaeUCG001.id.11321	A/T	A	-0.00054	0.01407	0.0457	0.963629	10258	25	-0.0184	0.0022	A	0.4534	-0.00054
6:165121844	genus.RuminococcaceaeUCG002.id.11360	A/T	A	0.00398	0.0109	0.3674	0.71347	17230	25	-0.0184	0.0022	A	0.4534	0.00398
6:165121844	genus.RuminococcaceaeUCG003.id.11361	A/T	A	0.00415	0.01188	0.3398	0.734007	14534	25	-0.0184	0.0022	A	0.4534	0.00415
6:165121844	genus.RuminococcaceaeUCG005.id.11363	A/T	A	0.00394	0.01123	0.3885	0.69772	16236	25	-0.0184	0.0022	A	0.4534	0.00394
6:165121844	genus.Sellimonas.id.14369	A/T	A	0.01064	0.02503	0.4264	0.669816	3202	22	-0.0184	0.0022	A	0.4534	0.01064
6:165121844	genus.Subdoligranulum.id.2070	A/T	A	0.01863	0.01075	1.719	0.0856144	17724	25	-0.0184	0.0022	A	0.4534	0.01863
6:27835435	family.Ruminococcaceae.id.2050	A/G	G	-0.03174	0.01628	-1.987	0.0469224	17946	24	0.0433	0.0034	A	0.8744	0.03174
6:27835435	genus..Eubacteriumventriosumgroup.id.11341	A/G	G	-0.00187	0.01786	-0.2093	0.834136	14954	24	0.0433	0.0034	A	0.8744	0.00187
6:27835435	genus..Ruminococcusgauvreauiigroup.id.11342	A/G	G	0.00803	0.01905	0.4075	0.683714	13121	24	0.0433	0.0034	A	0.8744	-0.00803
6:27835435	genus.Coprococcus3.id.11303	A/G	G	0.02087	0.0175	1.3218	0.186235	15501	24	0.0433	0.0034	A	0.8744	-0.02087
6:27835435	genus.Eggerthella.id.819	A/G	G	-0.03859	0.03032	-1.2043	0.228435	5136	22	0.0433	0.0034	A	0.8744	0.03859
6:27835435	genus.Hungatella.id.11306	A/G	G	-0.02845	0.03406	-0.888	0.374541	4161	22	0.0433	0.0034	A	0.8744	0.02845
6:27835435	genus.Lachnoclostridium.id.11308	A/G	G	-0.00229	0.01647	-0.2268	0.820424	17535	24	0.0433	0.0034	A	0.8744	0.00229
6:27835435	genus.LachnospiraceaeUCG001.id.11321	A/G	G	0.0492	0.02182	2.2233	0.0262023	9969	24	0.0433	0.0034	A	0.8744	-0.0492
6:27835435	genus.RuminococcaceaeUCG002.id.11360	A/G	G	-0.00974	0.01685	-0.4436	0.657332	16736	24	0.0433	0.0034	A	0.8744	0.00974
6:27835435	genus.RuminococcaceaeUCG003.id.11361	A/G	G	0.01045	0.01837	0.6267	0.530921	14120	24	0.0433	0.0034	A	0.8744	-0.01045
6:27835435	genus.RuminococcaceaeUCG005.id.11363	A/G	G	0.01215	0.01733	0.7725	0.439878	15758	24	0.0433	0.0034	A	0.8744	-0.01215
6:27835435	genus.Sellimonas.id.14369	A/G	G	-0.06744	0.0388	-1.8269	0.0676998	3111	21	0.0433	0.0034	A	0.8744	0.06744
6:27835435	genus.Subdoligranulum.id.2070	A/G	G	-0.02094	0.01661	-1.4089	0.158835	17217	24	0.0433	0.0034	A	0.8744	0.02094
6:66565703	family.Ruminococcaceae.id.2050	T/C	C	-0.02415	0.0625	-0.3843	0.700682	591	2	0.0158	0.0023	T	0.6035	0.02415
6:66565703	genus..Eubacteriumventriosumgroup.id.11341	T/C	C	-0.00896	0.07141	-0.1562	0.875875	451	2	0.0158	0.0023	T	0.6035	0.00896
6:66565703	genus..Ruminococcusgauvreauiigroup.id.11342	T/C	C	0.01722	0.06935	0.2338	0.81514	480	2	0.0158	0.0023	T	0.6035	-0.01722
6:66565703	genus.Coprococcus3.id.11303	T/C	C	-0.09522	0.07108	-1.3233	0.185702	454	2	0.0158	0.0023	T	0.6035	0.09522
6:66565703	genus.Eggerthella.id.819	T/C	C	-0.03033	0.18414	-0.1647	0.869101	64	1	0.0158	0.0023	T	0.6035	0.03033
6:66565703	genus.Hungatella.id.11306	T/C	C	-0.01264	0.08796	-0.1217	0.903057	297	2	0.0158	0.0023	T	0.6035	0.01264
6:66565703	genus.Lachnoclostridium.id.11308	T/C	C	-0.07274	0.06438	-1.1278	0.259404	555	2	0.0158	0.0023	T	0.6035	0.07274
6:66565703	genus.LachnospiraceaeUCG001.id.11321	T/C	C	-0.06614	0.09762	-0.6576	0.510795	240	2	0.0158	0.0023	T	0.6035	0.06614
6:66565703	genus.RuminococcaceaeUCG002.id.11360	T/C	C	-0.02541	0.06566	-0.3857	0.699645	536	2	0.0158	0.0023	T	0.6035	0.02541
6:66565703	genus.RuminococcaceaeUCG003.id.11361	T/C	C	-0.04492	0.0684	-0.6528	0.513756	494	2	0.0158	0.0023	T	0.6035	0.04492
6:66565703	genus.RuminococcaceaeUCG005.id.11363	T/C	C	0.03099	0.07853	0.3933	0.694172	373	2	0.0158	0.0023	T	0.6035	-0.03099
6:66565703	genus.Sellimonas.id.14369	T/C	C	-0.09331	0.14536	-0.6324	0.527126	107	2	0.0158	0.0023	T	0.6035	0.09331
6:66565703	genus.Subdoligranulum.id.2070	T/C	C	-0.06916	0.06595	-1.0531	0.292249	529	2	0.0158	0.0023	T	0.6035	0.06916
7:109099919	family.Ruminococcaceae.id.2050	A/G	G	0.00376	0.01049	0.3324	0.739587	18464	25	0.019	0.0022	A	0.4689	-0.00376
7:109099919	genus..Eubacteriumventriosumgroup.id.11341	A/G	G	0.00177	0.01148	0.159	0.873826	15418	25	0.019	0.0022	A	0.4689	-0.00177
7:109099919	genus..Ruminococcusgauvreauiigroup.id.11342	A/G	G	0.00483	0.01225	0.3736	0.708851	13512	25	0.019	0.0022	A	0.4689	-0.00483
7:109099919	genus.Coprococcus3.id.11303	A/G	G	0.01119	0.01127	0.9817	0.326297	15965	25	0.019	0.0022	A	0.4689	-0.01119
7:109099919	genus.Eggerthella.id.819	A/G	G	-0.04055	0.01975	-2.0314	0.0422144	5203	23	0.019	0.0022	A	0.4689	0.04055
7:109099919	genus.Hungatella.id.11306	A/G	G	-0.02674	0.02178	-1.2258	0.220199	4277	23	0.019	0.0022	A	0.4689	0.02674
7:109099919	genus.Lachnoclostridium.id.11308	A/G	G	0.01519	0.01061	1.4443	0.148683	18051	25	0.019	0.0022	A	0.4689	-0.01519
7:109099919	genus.LachnospiraceaeUCG001.id.11321	A/G	G	0.00565	0.01403	0.4155	0.677849	10256	25	0.019	0.0022	A	0.4689	-0.00565
7:109099919	genus.RuminococcaceaeUCG002.id.11360	A/G	G	0.00958	0.01085	0.8899	0.373573	17226	25	0.019	0.0022	A	0.4689	-0.00958
7:109099919	genus.RuminococcaceaeUCG003.id.11361	A/G	G	-0.02374	0.01182	-2.02	0.0433834	14531	25	0.019	0.0022	A	0.4689	0.02374
7:109099919	genus.RuminococcaceaeUCG005.id.11363	A/G	G	-0.00583	0.01118	-0.528	0.597499	16234	25	0.019	0.0022	A	0.4689	0.00583
7:109099919	genus.Sellimonas.id.14369	A/G	G	0.01838	0.02504	0.7507	0.452893	3202	22	0.019	0.0022	A	0.4689	-0.01838
7:109099919	genus.Subdoligranulum.id.2070	A/G	G	0.01761	0.0107	1.6353	0.102007	17720	25	0.019	0.0022	A	0.4689	-0.01761
7:117502574	family.Ruminococcaceae.id.2050	T/C	C	0.00457	0.01054	0.4298	0.667341	18468	25	0.0211	0.0022	T	0.5505	-0.00457
7:117502574	genus..Eubacteriumventriosumgroup.id.11341	T/C	C	0.00098	0.01153	0.0861	0.931466	15421	25	0.0211	0.0022	T	0.5505	-0.00098
7:117502574	genus..Ruminococcusgauvreauiigroup.id.11342	T/C	C	-0.03061	0.01231	-2.4696	0.0135264	13515	25	0.0211	0.0022	T	0.5505	0.03061
7:117502574	genus.Coprococcus3.id.11303	T/C	C	-0.00235	0.01134	-0.2119	0.832107	15968	25	0.0211	0.0022	T	0.5505	0.00235
7:117502574	genus.Eggerthella.id.819	T/C	C	0.02196	0.01982	1.0963	0.272991	5203	23	0.0211	0.0022	T	0.5505	-0.02196
7:117502574	genus.Hungatella.id.11306	T/C	C	0.00103	0.02175	0.0619	0.950722	4279	23	0.0211	0.0022	T	0.5505	-0.00103
7:117502574	genus.Lachnoclostridium.id.11308	T/C	C	-0.01002	0.01066	-0.9391	0.347628	18055	25	0.0211	0.0022	T	0.5505	0.01002
7:117502574	genus.LachnospiraceaeUCG001.id.11321	T/C	C	-0.01977	0.01415	-1.4065	0.159546	10258	25	0.0211	0.0022	T	0.5505	0.01977
7:117502574	genus.RuminococcaceaeUCG002.id.11360	T/C	C	0.00085	0.01091	0.0797	0.936555	17230	25	0.0211	0.0022	T	0.5505	-0.00085
7:117502574	genus.RuminococcaceaeUCG003.id.11361	T/C	C	0.02559	0.01187	2.1614	0.0306644	14534	25	0.0211	0.0022	T	0.5505	-0.02559
7:117502574	genus.RuminococcaceaeUCG005.id.11363	T/C	C	0.00217	0.01124	0.206	0.836791	16236	25	0.0211	0.0022	T	0.5505	-0.00217
7:117502574	genus.Sellimonas.id.14369	T/C	C	0.0104	0.0253	0.4151	0.678142	3202	22	0.0211	0.0022	T	0.5505	-0.0104
7:117502574	genus.Subdoligranulum.id.2070	T/C	C	-0.00399	0.01076	-0.3703	0.711084	17724	25	0.0211	0.0022	T	0.5505	0.00399
7:12253880	family.Ruminococcaceae.id.2050	A/G	A	0.00353	0.01058	0.321	0.748362	18466	25	0.022	0.0022	A	0.4177	0.00353
7:12253880	genus..Eubacteriumventriosumgroup.id.11341	A/G	A	-0.01326	0.01157	-1.1534	0.248664	15419	25	0.022	0.0022	A	0.4177	-0.01326
7:12253880	genus..Ruminococcusgauvreauiigroup.id.11342	A/G	A	-0.01333	0.01235	-1.0817	0.279341	13513	25	0.022	0.0022	A	0.4177	-0.01333
7:12253880	genus.Coprococcus3.id.11303	A/G	A	-0.0213	0.01137	-1.8817	0.0598632	15966	25	0.022	0.0022	A	0.4177	-0.0213
7:12253880	genus.Eggerthella.id.819	A/G	A	-0.025	0.01992	-1.2442	0.213352	5203	23	0.022	0.0022	A	0.4177	-0.025
7:12253880	genus.Hungatella.id.11306	A/G	A	0.01935	0.02193	0.8556	0.392219	4278	23	0.022	0.0022	A	0.4177	0.01935
7:12253880	genus.Lachnoclostridium.id.11308	A/G	A	-0.00525	0.0107	-0.5056	0.612997	18053	25	0.022	0.0022	A	0.4177	-0.00525
7:12253880	genus.LachnospiraceaeUCG001.id.11321	A/G	A	-0.01902	0.01417	-1.3433	0.179142	10257	25	0.022	0.0022	A	0.4177	-0.01902
7:12253880	genus.RuminococcaceaeUCG002.id.11360	A/G	A	-0.01729	0.01094	-1.5887	0.112106	17228	25	0.022	0.0022	A	0.4177	-0.01729
7:12253880	genus.RuminococcaceaeUCG003.id.11361	A/G	A	0.00467	0.01192	0.3921	0.695058	14532	25	0.022	0.0022	A	0.4177	0.00467
7:12253880	genus.RuminococcaceaeUCG005.id.11363	A/G	A	-0.01091	0.01128	-0.9629	0.335548	16235	25	0.022	0.0022	A	0.4177	-0.01091
7:12253880	genus.Sellimonas.id.14369	A/G	A	-0.00143	0.02537	-0.0653	0.947856	3202	22	0.022	0.0022	A	0.4177	-0.00143
7:12253880	genus.Subdoligranulum.id.2070	A/G	A	0.00385	0.01079	0.3465	0.729042	17722	25	0.022	0.0022	A	0.4177	0.00385
7:2110346	family.Ruminococcaceae.id.2050	T/C	C	-0.00955	0.01308	-0.798	0.424754	18468	25	0.0294	0.0028	T	0.8067	0.00955
7:2110346	genus..Eubacteriumventriosumgroup.id.11341	T/C	C	0.00962	0.01428	0.7121	0.476465	15421	25	0.0294	0.0028	T	0.8067	-0.00962
7:2110346	genus..Ruminococcusgauvreauiigroup.id.11342	T/C	C	0.01248	0.01526	0.7599	0.447374	13515	25	0.0294	0.0028	T	0.8067	-0.01248
7:2110346	genus.Coprococcus3.id.11303	T/C	C	-0.02115	0.01405	-1.5562	0.119613	15968	25	0.0294	0.0028	T	0.8067	0.02115
7:2110346	genus.Eggerthella.id.819	T/C	C	-0.00873	0.02459	-0.1857	0.852602	5203	23	0.0294	0.0028	T	0.8067	0.00873
7:2110346	genus.Hungatella.id.11306	T/C	C	0.05534	0.02691	2.0343	0.0419314	4279	23	0.0294	0.0028	T	0.8067	-0.05534
7:2110346	genus.Lachnoclostridium.id.11308	T/C	C	-0.00598	0.01323	-0.3725	0.709446	18055	25	0.0294	0.0028	T	0.8067	0.00598
7:2110346	genus.LachnospiraceaeUCG001.id.11321	T/C	C	0.02042	0.01743	1.1621	0.245235	10258	25	0.0294	0.0028	T	0.8067	-0.02042
7:2110346	genus.RuminococcaceaeUCG002.id.11360	T/C	C	0.01416	0.01353	0.9744	0.329957	17230	25	0.0294	0.0028	T	0.8067	-0.01416
7:2110346	genus.RuminococcaceaeUCG003.id.11361	T/C	C	-0.0051	0.01473	-0.2954	0.767536	14534	25	0.0294	0.0028	T	0.8067	0.0051
7:2110346	genus.RuminococcaceaeUCG005.id.11363	T/C	C	-0.0169	0.01394	-1.2424	0.214015	16236	25	0.0294	0.0028	T	0.8067	0.0169
7:2110346	genus.Sellimonas.id.14369	T/C	C	-0.0082	0.03098	-0.1948	0.845393	3202	22	0.0294	0.0028	T	0.8067	0.0082
7:2110346	genus.Subdoligranulum.id.2070	T/C	C	-0.00561	0.01335	-0.4584	0.646665	17724	25	0.0294	0.0028	T	0.8067	0.00561
7:82454404	family.Ruminococcaceae.id.2050	C/G	C	-0.01614	0.01052	-1.4669	0.142376	18466	25	-0.0159	0.0021	C	0.5319	-0.01614
7:82454404	genus..Eubacteriumventriosumgroup.id.11341	C/G	C	-0.02772	0.01151	-2.4332	0.0149578	15419	25	-0.0159	0.0021	C	0.5319	-0.02772
7:82454404	genus..Ruminococcusgauvreauiigroup.id.11342	C/G	C	-0.00926	0.01228	-0.805	0.420704	13513	25	-0.0159	0.0021	C	0.5319	-0.00926
7:82454404	genus.Coprococcus3.id.11303	C/G	C	0.01839	0.01131	1.647	0.099558	15966	25	-0.0159	0.0021	C	0.5319	0.01839
7:82454404	genus.Eggerthella.id.819	C/G	C	0.00022	0.01983	0.0259	0.979417	5203	23	-0.0159	0.0021	C	0.5319	0.00022
7:82454404	genus.Hungatella.id.11306	C/G	C	-0.01908	0.02188	-0.8552	0.39244	4278	23	-0.0159	0.0021	C	0.5319	-0.01908
7:82454404	genus.Lachnoclostridium.id.11308	C/G	C	0.00693	0.01064	0.6665	0.505155	18053	25	-0.0159	0.0021	C	0.5319	0.00693
7:82454404	genus.LachnospiraceaeUCG001.id.11321	C/G	C	-0.03677	0.01405	-2.6331	0.00845845	10257	25	-0.0159	0.0021	C	0.5319	-0.03677
7:82454404	genus.RuminococcaceaeUCG002.id.11360	C/G	C	-0.012	0.01089	-1.0365	0.299922	17228	25	-0.0159	0.0021	C	0.5319	-0.012
7:82454404	genus.RuminococcaceaeUCG003.id.11361	C/G	C	0.00121	0.01186	0.174	0.861865	14532	25	-0.0159	0.0021	C	0.5319	0.00121
7:82454404	genus.RuminococcaceaeUCG005.id.11363	C/G	C	-0.00965	0.01121	-0.7287	0.466124	16235	25	-0.0159	0.0021	C	0.5319	-0.00965
7:82454404	genus.Sellimonas.id.14369	C/G	C	-0.05039	0.02502	-1.9859	0.0470333	3202	22	-0.0159	0.0021	C	0.5319	-0.05039
7:82454404	genus.Subdoligranulum.id.2070	C/G	C	-0.00885	0.01074	-0.8044	0.421051	17722	25	-0.0159	0.0021	C	0.5319	-0.00885
7:82936909	family.Ruminococcaceae.id.2050	C/T	T	-0.00455	0.01054	-0.3883	0.69772	18465	25	0.0148	0.0022	T	0.4347	-0.00455
7:82936909	genus..Eubacteriumventriosumgroup.id.11341	C/T	T	-0.00319	0.01152	-0.2552	0.798569	15419	25	0.0148	0.0022	T	0.4347	-0.00319
7:82936909	genus..Ruminococcusgauvreauiigroup.id.11342	C/T	T	0.00722	0.01231	0.5835	0.559624	13513	25	0.0148	0.0022	T	0.4347	0.00722
7:82936909	genus.Coprococcus3.id.11303	C/T	T	0.00928	0.01133	0.8189	0.412901	15966	25	0.0148	0.0022	T	0.4347	0.00928
7:82936909	genus.Eggerthella.id.819	C/T	T	0.02013	0.01982	0.9523	0.340996	5203	23	0.0148	0.0022	T	0.4347	0.02013
7:82936909	genus.Hungatella.id.11306	C/T	T	0.01323	0.02185	0.6125	0.540273	4278	23	0.0148	0.0022	T	0.4347	0.01323
7:82936909	genus.Lachnoclostridium.id.11308	C/T	T	0.00657	0.01066	0.5718	0.567457	18052	25	0.0148	0.0022	T	0.4347	0.00657
7:82936909	genus.LachnospiraceaeUCG001.id.11321	C/T	T	0.00475	0.01413	0.3246	0.745635	10257	25	0.0148	0.0022	T	0.4347	0.00475
7:82936909	genus.RuminococcaceaeUCG002.id.11360	C/T	T	0.00708	0.0109	0.6526	0.514143	17227	25	0.0148	0.0022	T	0.4347	0.00708
7:82936909	genus.RuminococcaceaeUCG003.id.11361	C/T	T	-0.00238	0.01187	-0.1563	0.875718	14531	25	0.0148	0.0022	T	0.4347	-0.00238
7:82936909	genus.RuminococcaceaeUCG005.id.11363	C/T	T	0.00841	0.01123	0.7518	0.452171	16234	25	0.0148	0.0022	T	0.4347	0.00841
7:82936909	genus.Sellimonas.id.14369	C/T	T	0.02761	0.02526	1.0567	0.290694	3202	22	0.0148	0.0022	T	0.4347	0.02761
7:82936909	genus.Subdoligranulum.id.2070	C/T	T	0.01092	0.01075	1.0138	0.310774	17721	25	0.0148	0.0022	T	0.4347	0.01092
8:65562019	family.Ruminococcaceae.id.2050	T/G	T	-0.00996	0.01485	-0.5808	0.56124	18468	25	-0.0226	0.0031	T	0.1522	-0.00996
8:65562019	genus..Eubacteriumventriosumgroup.id.11341	T/G	T	-1e-05	0.01629	-0.009	0.99266	15421	25	-0.0226	0.0031	T	0.1522	-1e-05
8:65562019	genus..Ruminococcusgauvreauiigroup.id.11342	T/G	T	0.0028	0.01737	0.1902	0.849152	13515	25	-0.0226	0.0031	T	0.1522	0.0028
8:65562019	genus.Coprococcus3.id.11303	T/G	T	0.01518	0.016	0.8723	0.383099	15968	25	-0.0226	0.0031	T	0.1522	0.01518
8:65562019	genus.Eggerthella.id.819	T/G	T	0.02932	0.0281	1.1993	0.23045	5203	23	-0.0226	0.0031	T	0.1522	0.02932
8:65562019	genus.Hungatella.id.11306	T/G	T	-0.0282	0.03083	-1.0655	0.286604	4279	23	-0.0226	0.0031	T	0.1522	-0.0282
8:65562019	genus.Lachnoclostridium.id.11308	T/G	T	0.02263	0.01503	1.3717	0.170188	18055	25	-0.0226	0.0031	T	0.1522	0.02263
8:65562019	genus.LachnospiraceaeUCG001.id.11321	T/G	T	-0.00856	0.02024	-0.3924	0.694615	10258	25	-0.0226	0.0031	T	0.1522	-0.00856
8:65562019	genus.RuminococcaceaeUCG002.id.11360	T/G	T	-0.03132	0.01539	-1.9983	0.0456733	17230	25	-0.0226	0.0031	T	0.1522	-0.03132
8:65562019	genus.RuminococcaceaeUCG003.id.11361	T/G	T	-0.0215	0.01675	-1.3651	0.17219	14534	25	-0.0226	0.0031	T	0.1522	-0.0215
8:65562019	genus.RuminococcaceaeUCG005.id.11363	T/G	T	-0.00072	0.0159	0.0224	0.982288	16236	25	-0.0226	0.0031	T	0.1522	-0.00072
8:65562019	genus.Sellimonas.id.14369	T/G	T	-0.00529	0.03672	-0.1622	0.871148	3202	22	-0.0226	0.0031	T	0.1522	-0.00529
8:65562019	genus.Subdoligranulum.id.2070	T/G	T	-0.02531	0.01517	-1.5737	0.115534	17724	25	-0.0226	0.0031	T	0.1522	-0.02531
9:119731045	family.Ruminococcaceae.id.2050	T/G	G	0.00087	0.01151	0.1051	0.916376	18465	25	0.0169	0.0024	T	0.7173	-0.00087
9:119731045	genus..Eubacteriumventriosumgroup.id.11341	T/G	G	0.0142	0.01263	1.1142	0.265193	15419	25	0.0169	0.0024	T	0.7173	-0.0142
9:119731045	genus..Ruminococcusgauvreauiigroup.id.11342	T/G	G	-0.01609	0.01348	-1.1582	0.246701	13513	25	0.0169	0.0024	T	0.7173	0.01609
9:119731045	genus.Coprococcus3.id.11303	T/G	G	0.00683	0.0124	0.5866	0.557607	15966	25	0.0169	0.0024	T	0.7173	-0.00683
9:119731045	genus.Eggerthella.id.819	T/G	G	-0.03175	0.02178	-1.4501	0.147003	5203	23	0.0169	0.0024	T	0.7173	0.03175
9:119731045	genus.Hungatella.id.11306	T/G	G	-0.02017	0.02392	-0.8754	0.381356	4278	23	0.0169	0.0024	T	0.7173	0.02017
9:119731045	genus.Lachnoclostridium.id.11308	T/G	G	-0.00948	0.01165	-0.869	0.384738	18052	25	0.0169	0.0024	T	0.7173	0.00948
9:119731045	genus.LachnospiraceaeUCG001.id.11321	T/G	G	-0.00348	0.0155	-0.2274	0.819957	10257	25	0.0169	0.0024	T	0.7173	0.00348
9:119731045	genus.RuminococcaceaeUCG002.id.11360	T/G	G	0.01453	0.01193	1.209	0.226663	17227	25	0.0169	0.0024	T	0.7173	-0.01453
9:119731045	genus.RuminococcaceaeUCG003.id.11361	T/G	G	-0.00066	0.01299	-0.0713	0.943079	14531	25	0.0169	0.0024	T	0.7173	0.00066
9:119731045	genus.RuminococcaceaeUCG005.id.11363	T/G	G	0.01566	0.0123	1.271	0.2038	16234	25	0.0169	0.0024	T	0.7173	-0.01566
9:119731045	genus.Sellimonas.id.14369	T/G	G	0.05239	0.02772	1.8983	0.0576697	3202	22	0.0169	0.0024	T	0.7173	-0.05239
9:119731045	genus.Subdoligranulum.id.2070	T/G	G	0.00822	0.01176	0.699	0.484677	17721	25	0.0169	0.0024	T	0.7173	-0.00822
9:120484009	family.Ruminococcaceae.id.2050	A/G	G	0.00911	0.01115	0.7461	0.455667	18468	25	-0.0219	0.0023	A	0.6433	-0.00911
9:120484009	genus..Eubacteriumventriosumgroup.id.11341	A/G	G	0.00619	0.01218	0.2132	0.831327	15421	25	-0.0219	0.0023	A	0.6433	-0.00619
9:120484009	genus..Ruminococcusgauvreauiigroup.id.11342	A/G	G	0.03265	0.01299	2.457	0.0140103	13515	25	-0.0219	0.0023	A	0.6433	-0.03265
9:120484009	genus.Coprococcus3.id.11303	A/G	G	0.01824	0.01197	1.4885	0.136645	15968	25	-0.0219	0.0023	A	0.6433	-0.01824
9:120484009	genus.Eggerthella.id.819	A/G	G	0.01192	0.02099	0.6179	0.536707	5203	23	-0.0219	0.0023	A	0.6433	-0.01192
9:120484009	genus.Hungatella.id.11306	A/G	G	-0.00735	0.02317	-0.0856	0.931625	4279	23	-0.0219	0.0023	A	0.6433	0.00735
9:120484009	genus.Lachnoclostridium.id.11308	A/G	G	0.01851	0.01127	1.7096	0.0873769	18055	25	-0.0219	0.0023	A	0.6433	-0.01851
9:120484009	genus.LachnospiraceaeUCG001.id.11321	A/G	G	0.01999	0.01479	1.2146	0.224519	10258	25	-0.0219	0.0023	A	0.6433	-0.01999
9:120484009	genus.RuminococcaceaeUCG002.id.11360	A/G	G	0.00441	0.01152	0.2462	0.805682	17230	25	-0.0219	0.0023	A	0.6433	-0.00441
9:120484009	genus.RuminococcaceaeUCG003.id.11361	A/G	G	-0.00993	0.01257	-0.8596	0.389899	14534	25	-0.0219	0.0023	A	0.6433	0.00993
9:120484009	genus.RuminococcaceaeUCG005.id.11363	A/G	G	0.00522	0.01185	0.3277	0.743214	16236	25	-0.0219	0.0023	A	0.6433	-0.00522
9:120484009	genus.Sellimonas.id.14369	A/G	G	0.0653	0.02614	2.4694	0.013534	3202	22	-0.0219	0.0023	A	0.6433	-0.0653
9:120484009	genus.Subdoligranulum.id.2070	A/G	G	0.01903	0.01137	1.6063	0.10823	17724	25	-0.0219	0.0023	A	0.6433	-0.01903
9:126634255	family.Ruminococcaceae.id.2050	C/T	C	-0.01756	0.01175	-1.529	0.126264	18461	25	-0.0178	0.0025	T	0.7609	0.01756
9:126634255	genus..Eubacteriumventriosumgroup.id.11341	C/T	C	-0.025	0.01287	-1.9369	0.0527453	15416	25	-0.0178	0.0025	T	0.7609	0.025
9:126634255	genus..Ruminococcusgauvreauiigroup.id.11342	C/T	C	0.01374	0.01376	0.9908	0.321783	13509	25	-0.0178	0.0025	T	0.7609	-0.01374
9:126634255	genus.Coprococcus3.id.11303	C/T	C	0.01654	0.01264	1.3143	0.188779	15963	25	-0.0178	0.0025	T	0.7609	-0.01654
9:126634255	genus.Eggerthella.id.819	C/T	C	-0.04439	0.02213	-1.9947	0.0460647	5203	23	-0.0178	0.0025	T	0.7609	0.04439
9:126634255	genus.Hungatella.id.11306	C/T	C	0.01446	0.02444	0.6118	0.540802	4276	23	-0.0178	0.0025	T	0.7609	-0.01446
9:126634255	genus.Lachnoclostridium.id.11308	C/T	C	0.01008	0.01189	0.8624	0.388467	18049	25	-0.0178	0.0025	T	0.7609	-0.01008
9:126634255	genus.LachnospiraceaeUCG001.id.11321	C/T	C	-0.00297	0.01573	-0.2052	0.83726	10255	25	-0.0178	0.0025	T	0.7609	0.00297
9:126634255	genus.RuminococcaceaeUCG002.id.11360	C/T	C	-0.00692	0.01217	-0.6043	0.545578	17224	25	-0.0178	0.0025	T	0.7609	0.00692
9:126634255	genus.RuminococcaceaeUCG003.id.11361	C/T	C	-0.00507	0.01325	-0.4135	0.679167	14528	25	-0.0178	0.0025	T	0.7609	0.00507
9:126634255	genus.RuminococcaceaeUCG005.id.11363	C/T	C	-0.01851	0.01252	-1.464	0.143139	16232	25	-0.0178	0.0025	T	0.7609	0.01851
9:126634255	genus.Sellimonas.id.14369	C/T	C	-0.01439	0.02808	-0.5079	0.611453	3201	22	-0.0178	0.0025	T	0.7609	0.01439
9:126634255	genus.Subdoligranulum.id.2070	C/T	C	-0.00866	0.012	-0.7334	0.463315	17718	25	-0.0178	0.0025	T	0.7609	0.00866
9:17016503	family.Ruminococcaceae.id.2050	T/A	T	1e-05	0.01044	-0.0042	0.996489	18459	25	0.0176	0.0022	A	0.5438	-1e-05
9:17016503	genus..Eubacteriumventriosumgroup.id.11341	T/A	T	0.01623	0.01142	1.4277	0.153407	15414	25	0.0176	0.0022	A	0.5438	-0.01623
9:17016503	genus..Ruminococcusgauvreauiigroup.id.11342	T/A	T	-0.004	0.0122	-0.335	0.737474	13508	25	0.0176	0.0022	A	0.5438	0.004
9:17016503	genus.Coprococcus3.id.11303	T/A	T	-0.00108	0.01122	-0.0795	0.936555	15961	25	0.0176	0.0022	A	0.5438	0.00108
9:17016503	genus.Eggerthella.id.819	T/A	T	0.01085	0.01966	0.563	0.573435	5203	23	0.0176	0.0022	A	0.5438	-0.01085
9:17016503	genus.Hungatella.id.11306	T/A	T	-0.00946	0.02165	-0.4334	0.664724	4275	23	0.0176	0.0022	A	0.5438	0.00946
9:17016503	genus.Lachnoclostridium.id.11308	T/A	T	0.00582	0.01056	0.5505	0.582045	18047	25	0.0176	0.0022	A	0.5438	-0.00582
9:17016503	genus.LachnospiraceaeUCG001.id.11321	T/A	T	-0.00246	0.014	-0.1874	0.851347	10254	25	0.0176	0.0022	A	0.5438	0.00246
9:17016503	genus.RuminococcaceaeUCG002.id.11360	T/A	T	-0.00727	0.01081	-0.6663	0.505155	17222	25	0.0176	0.0022	A	0.5438	0.00727
9:17016503	genus.RuminococcaceaeUCG003.id.11361	T/A	T	-0.01958	0.01176	-1.6637	0.0961524	14526	25	0.0176	0.0022	A	0.5438	0.01958
9:17016503	genus.RuminococcaceaeUCG005.id.11363	T/A	T	0.00019	0.01113	0.0198	0.984203	16231	25	0.0176	0.0022	A	0.5438	-0.00019
9:17016503	genus.Sellimonas.id.14369	T/A	T	0.01825	0.02503	0.7168	0.473498	3201	22	0.0176	0.0022	A	0.5438	-0.01825
9:17016503	genus.Subdoligranulum.id.2070	T/A	T	-0.00406	0.01066	-0.3844	0.700682	17716	25	0.0176	0.0022	A	0.5438	0.00406
9:23737627	family.Ruminococcaceae.id.2050	A/G	A	-0.00064	0.01046	-0.0555	0.95566	18468	25	-0.0211	0.0022	A	0.4665	-0.00064
9:23737627	genus..Eubacteriumventriosumgroup.id.11341	A/G	A	-0.0242	0.01144	-2.1185	0.0341243	15421	25	-0.0211	0.0022	A	0.4665	-0.0242
9:23737627	genus..Ruminococcusgauvreauiigroup.id.11342	A/G	A	0.01219	0.01223	0.9888	0.322859	13515	25	-0.0211	0.0022	A	0.4665	0.01219
9:23737627	genus.Coprococcus3.id.11303	A/G	A	0.00068	0.01125	0.0594	0.952634	15968	25	-0.0211	0.0022	A	0.4665	0.00068
9:23737627	genus.Eggerthella.id.819	A/G	A	-0.00896	0.01969	-0.4617	0.644225	5203	23	-0.0211	0.0022	A	0.4665	-0.00896
9:23737627	genus.Hungatella.id.11306	A/G	A	-0.03233	0.02168	-1.4812	0.138553	4279	23	-0.0211	0.0022	A	0.4665	-0.03233
9:23737627	genus.Lachnoclostridium.id.11308	A/G	A	-0.00896	0.01058	-0.8543	0.392883	18055	25	-0.0211	0.0022	A	0.4665	-0.00896
9:23737627	genus.LachnospiraceaeUCG001.id.11321	A/G	A	0.00334	0.01402	0.2399	0.810485	10258	25	-0.0211	0.0022	A	0.4665	0.00334
9:23737627	genus.RuminococcaceaeUCG002.id.11360	A/G	A	-0.014	0.01082	-1.2814	0.200053	17230	25	-0.0211	0.0022	A	0.4665	-0.014
9:23737627	genus.RuminococcaceaeUCG003.id.11361	A/G	A	-0.01111	0.01179	-0.9337	0.350407	14534	25	-0.0211	0.0022	A	0.4665	-0.01111
9:23737627	genus.RuminococcaceaeUCG005.id.11363	A/G	A	-0.01443	0.01115	-1.2799	0.200545	16236	25	-0.0211	0.0022	A	0.4665	-0.01443
9:23737627	genus.Sellimonas.id.14369	A/G	A	-0.03014	0.02502	-1.1911	0.233575	3202	22	-0.0211	0.0022	A	0.4665	-0.03014
9:23737627	genus.Subdoligranulum.id.2070	A/G	A	0.01201	0.01068	1.1321	0.257634	17724	25	-0.0211	0.0022	A	0.4665	0.01201
9:2983774	family.Ruminococcaceae.id.2050	A/C	C	-0.00567	0.01096	-0.4791	0.631796	18467	25	0.0186	0.0022	A	0.6243	0.00567
9:2983774	genus..Eubacteriumventriosumgroup.id.11341	A/C	C	-0.00588	0.01195	-0.5701	0.568542	15420	25	0.0186	0.0022	A	0.6243	0.00588
9:2983774	genus..Ruminococcusgauvreauiigroup.id.11342	A/C	C	0.01251	0.01276	1.0706	0.284349	13514	25	0.0186	0.0022	A	0.6243	-0.01251
9:2983774	genus.Coprococcus3.id.11303	A/C	C	-0.00321	0.01176	-0.2998	0.76433	15967	25	0.0186	0.0022	A	0.6243	0.00321
9:2983774	genus.Eggerthella.id.819	A/C	C	0.00733	0.02054	0.3133	0.754129	5203	23	0.0186	0.0022	A	0.6243	-0.00733
9:2983774	genus.Hungatella.id.11306	A/C	C	0.00594	0.02259	0.2375	0.812346	4279	23	0.0186	0.0022	A	0.6243	-0.00594
9:2983774	genus.Lachnoclostridium.id.11308	A/C	C	0.00407	0.01108	0.51	0.610192	18054	25	0.0186	0.0022	A	0.6243	-0.00407
9:2983774	genus.LachnospiraceaeUCG001.id.11321	A/C	C	-0.01674	0.01455	-1.1128	0.265708	10258	25	0.0186	0.0022	A	0.6243	0.01674
9:2983774	genus.RuminococcaceaeUCG002.id.11360	A/C	C	-0.00254	0.01133	-0.2201	0.825715	17229	25	0.0186	0.0022	A	0.6243	0.00254
9:2983774	genus.RuminococcaceaeUCG003.id.11361	A/C	C	0.01065	0.01234	0.9285	0.3532	14533	25	0.0186	0.0022	A	0.6243	-0.01065
9:2983774	genus.RuminococcaceaeUCG005.id.11363	A/C	C	-0.00417	0.01165	-0.3784	0.704985	16235	25	0.0186	0.0022	A	0.6243	0.00417
9:2983774	genus.Sellimonas.id.14369	A/C	C	-0.00673	0.02579	-0.2573	0.79687	3202	22	0.0186	0.0022	A	0.6243	0.00673
9:2983774	genus.Subdoligranulum.id.2070	A/C	C	0.00823	0.01118	0.736	0.461731	17723	25	0.0186	0.0022	A	0.6243	-0.00823
9:31124452	family.Ruminococcaceae.id.2050	C/G	C	0.00911	0.01142	0.7507	0.452893	17873	23	-0.0196	0.0024	C	0.3196	0.00911
9:31124452	genus..Eubacteriumventriosumgroup.id.11341	C/G	C	-0.00092	0.01245	-0.0414	0.966977	14967	23	-0.0196	0.0024	C	0.3196	-0.00092
9:31124452	genus..Ruminococcusgauvreauiigroup.id.11342	C/G	C	0.00283	0.01334	0.24	0.81033	13032	23	-0.0196	0.0024	C	0.3196	0.00283
9:31124452	genus.Coprococcus3.id.11303	C/G	C	-0.00106	0.01224	-0.1112	0.911299	15511	23	-0.0196	0.0024	C	0.3196	-0.00106
9:31124452	genus.Eggerthella.id.819	C/G	C	-0.01881	0.02119	-0.8021	0.422437	5139	22	-0.0196	0.0024	C	0.3196	-0.01881
9:31124452	genus.Hungatella.id.11306	C/G	C	-0.05321	0.02425	-2.1498	0.0315552	3980	21	-0.0196	0.0024	C	0.3196	-0.05321
9:31124452	genus.Lachnoclostridium.id.11308	C/G	C	0.00153	0.01154	0.2094	0.834292	17496	23	-0.0196	0.0024	C	0.3196	0.00153
9:31124452	genus.LachnospiraceaeUCG001.id.11321	C/G	C	-0.00123	0.01512	-0.0572	0.954386	10016	23	-0.0196	0.0024	C	0.3196	-0.00123
9:31124452	genus.RuminococcaceaeUCG002.id.11360	C/G	C	-0.00846	0.01181	-0.7063	0.479939	16690	23	-0.0196	0.0024	C	0.3196	-0.00846
9:31124452	genus.RuminococcaceaeUCG003.id.11361	C/G	C	-0.01137	0.0129	-0.9302	0.352164	14037	23	-0.0196	0.0024	C	0.3196	-0.01137
9:31124452	genus.RuminococcaceaeUCG005.id.11363	C/G	C	0.00149	0.01209	0.1205	0.904166	15861	23	-0.0196	0.0024	C	0.3196	0.00149
9:31124452	genus.Sellimonas.id.14369	C/G	C	-0.01104	0.02694	-0.398	0.690483	3095	20	-0.0196	0.0024	C	0.3196	-0.01104
9:31124452	genus.Subdoligranulum.id.2070	C/G	C	0.0002	0.01164	-0.0066	0.994574	17191	23	-0.0196	0.0024	C	0.3196	0.0002
9:36999369	family.Ruminococcaceae.id.2050	C/T	T	-0.01616	0.01073	-1.4899	0.136224	18460	25	0.0251	0.0022	T	0.3736	-0.01616
9:36999369	genus..Eubacteriumventriosumgroup.id.11341	C/T	T	0.03121	0.01175	2.6277	0.00859896	15415	25	0.0251	0.0022	T	0.3736	0.03121
9:36999369	genus..Ruminococcusgauvreauiigroup.id.11342	C/T	T	0.00101	0.01258	0.102	0.918915	13508	25	0.0251	0.0022	T	0.3736	0.00101
9:36999369	genus.Coprococcus3.id.11303	C/T	T	0.00831	0.01154	0.7664	0.443438	15962	25	0.0251	0.0022	T	0.3736	0.00831
9:36999369	genus.Eggerthella.id.819	C/T	T	0.01204	0.02023	0.6203	0.535126	5203	23	0.0251	0.0022	T	0.3736	0.01204
9:36999369	genus.Hungatella.id.11306	C/T	T	-0.02111	0.02249	-0.9565	0.338769	4275	23	0.0251	0.0022	T	0.3736	-0.02111
9:36999369	genus.Lachnoclostridium.id.11308	C/T	T	-0.00211	0.01085	-0.1982	0.842889	18048	25	0.0251	0.0022	T	0.3736	-0.00211
9:36999369	genus.LachnospiraceaeUCG001.id.11321	C/T	T	0.00548	0.01439	0.406	0.68489	10255	25	0.0251	0.0022	T	0.3736	0.00548
9:36999369	genus.RuminococcaceaeUCG002.id.11360	C/T	T	-0.01013	0.01111	-0.9527	0.340691	17223	25	0.0251	0.0022	T	0.3736	-0.01013
9:36999369	genus.RuminococcaceaeUCG003.id.11361	C/T	T	-0.00119	0.0121	-0.1178	0.906068	14527	25	0.0251	0.0022	T	0.3736	-0.00119
9:36999369	genus.RuminococcaceaeUCG005.id.11363	C/T	T	-0.00882	0.01144	-0.7682	0.442368	16231	25	0.0251	0.0022	T	0.3736	-0.00882
9:36999369	genus.Sellimonas.id.14369	C/T	T	-0.00621	0.02577	-0.2796	0.779784	3201	22	0.0251	0.0022	T	0.3736	-0.00621
9:36999369	genus.Subdoligranulum.id.2070	C/T	T	-0.00896	0.01095	-0.7508	0.452773	17717	25	0.0251	0.0022	T	0.3736	-0.00896

## Sheet: Supplementary Table 2
Instruments for microbiota
PValue	SNPName	SNPChr	SNPChrPos	rsID	ProbeName	SNPType	effect_allel_microb	freq_effectallele_microb	OverallZScore	SampleSize	allele_match	beta_microb	se_microb	effect_allele_MDD	beta_MDD	se_MDD	freq_effectallele_MDD	beta_mdd_flip
7.0359e-06	1:24473669	1	24473669	rs76724913	family.Ruminococcaceae.id.2050	G/T	T	0.0637102	4.4927	17649	TRUE	0.0978531	0.0217805	T	-0.0024	0.0087	0.0666	-0.0024
6.4219e-06	1:61435089	1	61435089	rs56697967	family.Ruminococcaceae.id.2050	A/G	G	0.1117	4.5121	18467	FALSE	0.0744938	0.0165098	A	-0.0035	0.0069	0.889	0.0035
7.2777e-06	1:107661606	1	107661606	rs1612733	family.Ruminococcaceae.id.2050	C/T	T	0.058398	4.4855	15149	TRUE	0.10982	0.0244834	T	0.0092	0.0096	0.0567	0.0092
3.5112e-06	2:218213386	2	218213386	rs10172096	family.Ruminococcaceae.id.2050	A/G	A	0.0428098	4.6384	4140	TRUE	0.251164	0.0541488	A	-0.0005	0.0107	0.0424	-0.0005
4.681e-06	8:69732887	8	69732887	rs10093275	family.Ruminococcaceae.id.2050	C/T	C	0.291138	4.5787	18468	FALSE	0.0524132	0.0114472	T	-0.0021	0.0047	0.7112	0.0021
1.6628e-06	9:2801371	9	2801371	rs56199908	family.Ruminococcaceae.id.2050	C/T	T	0.0587584	-4.7904	5618	TRUE	-0.191776	0.0400335	T	0.006	0.0095	0.0594	0.006
2.3814e-07	12:47215359	12	47215359	rs117677831	family.Ruminococcaceae.id.2050	A/G	G	0.093851	5.167	15968	FALSE	0.0990641	0.0191725	A	-0.0013	0.0076	0.9052	0.0013
8.4679e-06	20:58278102	20	58278102	rs2426816	family.Ruminococcaceae.id.2050	A/T	T	0.492265	-4.4529	17907	FALSE	-0.047039	0.0105637	A	0.001	0.0043	0.5064	-0.001
3.4774e-06	1:9136139	1	9136139	rs112205261	genus.Eggerthella.id.819	C/T	T	0.0645012	-4.6403	5092	TRUE	-0.186795	0.0402549	T	0.0015	0.0089	0.0645	0.0015
6.1957e-06	1:221890991	1	221890991	rs6678488	genus.Eggerthella.id.819	C/A	C	0.441571	4.5198	5203	FALSE	0.0890517	0.0197026	A	0.0041	0.0044	0.5592	-0.0041
1.3791e-06	2:45453805	2	45453805	rs3851328	genus.Eggerthella.id.819	G/T	T	0.234661	-4.8279	5203	TRUE	-0.111429	0.0230802	T	0.0003	0.0051	0.2354	0.0003
6.1027e-06	2:141337454	2	141337454	rs6430926	genus.Eggerthella.id.819	C/T	C	0.49727	4.5229	5203	FALSE	0.0885033	0.0195678	T	-0.0055	0.0043	0.5045	0.0055
8.3893e-06	3:83734015	3	83734015	rs116603267	genus.Eggerthella.id.819	A/G	G	0.0790295	4.4551	4898	FALSE	0.166509	0.0373749	A	-0.0059	0.0082	0.923	0.0059
8.3192e-06	7:38292857	7	38292857	rs12701617	genus.Eggerthella.id.819	G/A	A	0.42718	-4.4567	5203	TRUE	-0.0881515	0.0197795	A	-0.0075	0.0043	0.4296	-0.0075
9.3103e-06	11:102460777	11	102460777	rs1711399	genus.Eggerthella.id.819	T/G	G	0.423302	4.4327	5203	FALSE	0.0877826	0.0198034	T	0.0097	0.0043	0.5742	-0.0097
7.6483e-06	17:16954103	17	16954103	rs7222311	genus.Eggerthella.id.819	G/A	A	0.198812	4.4749	4962	TRUE	0.112325	0.0251011	A	-0.0038	0.0054	0.1985	-0.0038
5.9657e-06	20:55647869	20	55647869	rs76663501	genus.Eggerthella.id.819	T/C	C	0.089557	4.5278	4870	FALSE	0.160332	0.0354105	T	-0.0051	0.0078	0.9135	0.0051
7.0095e-06	21:29742178	21	29742178	rs1738091	genus.Eggerthella.id.819	A/T	T	0.26374	4.4935	5203	FALSE	0.0997696	0.0222031	A	-0.0013	0.0049	0.7376	0.0013
9.3103e-06	1:208109132	1	208109132	rs12047957	genus.Hungatella.id.11306	A/G	A	0.164041	-4.4325	4219	TRUE	-0.130002	0.0293294	A	0.0054	0.0058	0.1638	0.0054
6.4645e-06	4:166058986	4	166058986	rs13104209	genus.Hungatella.id.11306	T/C	C	0.144804	-4.5104	4069	FALSE	-0.141726	0.0314221	T	0.0015	0.0062	0.8544	-0.0015
6.7507e-06	5:58424440	5	58424440	rs10044993	genus.Hungatella.id.11306	A/C	C	0.147625	4.5014	4279	FALSE	0.136849	0.0304013	A	0.0041	0.0062	0.8551	-0.0041
5.3392e-06	9:8395367	9	8395367	rs7851088	genus.Hungatella.id.11306	A/C	C	0.162321	-4.5509	4279	FALSE	-0.133087	0.0292442	A	0.0006	0.0058	0.8366	-0.0006
8.082e-06	13:99593241	13	99593241	rs7987131	genus.Hungatella.id.11306	A/G	G	0.286618	4.4632	4039	FALSE	0.10955	0.0245452	A	0.0045	0.0048	0.7118	-0.0045
6.7444e-06	15:89577376	15	89577376	rs72759041	genus.Hungatella.id.11306	T/G	G	0.237623	-4.5015	3980	FALSE	-0.118241	0.0262671	T	0.0081	0.0052	0.7643	-0.0081
4.5967e-06	1:185091351	1	185091351	rs12566975	genus.Lachnoclostridium.id.11308	T/C	T	0.482132	-4.5823	18054	TRUE	-0.0482322	0.0105258	T	-0.0024	0.0043	0.4828	-0.0024
8.4995e-06	2:103301989	2	103301989	rs6543180	genus.Lachnoclostridium.id.11308	C/A	A	0.404189	4.4524	18054	TRUE	0.0477208	0.010718	A	-0.003	0.0044	0.4063	-0.003
3.7568e-06	3:23019664	3	23019664	rs575175	genus.Lachnoclostridium.id.11308	A/T	T	0.496109	-4.6243	18043	FALSE	-0.0486589	0.0105224	A	-0.0029	0.0043	0.5056	0.0029
6.4584e-06	3:66725561	3	66725561	rs7617141	genus.Lachnoclostridium.id.11308	T/C	C	0.0815246	-4.5106	17531	FALSE	-0.0879804	0.0195053	T	-0.0008	0.0078	0.9165	0.0008
9.0126e-06	3:144516395	3	144516395	rs34307675	genus.Lachnoclostridium.id.11308	C/T	T	0.115892	-4.4394	18039	TRUE	-0.0729771	0.0164385	T	0.0009	0.0068	0.1156	0.0009
9.4384e-07	3:177470032	3	177470032	rs62285313	genus.Lachnoclostridium.id.11308	A/G	A	0.107407	4.903	17124	TRUE	0.085506	0.0174395	A	-0.0038	0.0071	0.1056	-0.0038
7.9102e-06	4:38693924	4	38693924	rs73232901	genus.Lachnoclostridium.id.11308	C/A	A	0.0800618	-4.4675	18053	TRUE	-0.0865851	0.0193811	A	0.0005	0.0079	0.082	0.0005
9.5199e-06	6:94721422	6	94721422	rs117518699	genus.Lachnoclostridium.id.11308	C/T	T	0.0628083	4.4279	14127	TRUE	0.108501	0.024504	T	0.0193	0.009	0.063	0.0193
7.9621e-06	8:59311697	8	59311697	rs1030431	genus.Lachnoclostridium.id.11308	A/G	A	0.331056	-4.4662	18048	TRUE	-0.0499256	0.0111785	A	0.0026	0.0046	0.3326	0.0026
2.9568e-06	12:28169306	12	28169306	rs61915992	genus.Lachnoclostridium.id.11308	A/T	A	0.123592	4.674	16906	TRUE	0.0771835	0.0165134	A	-0.001	0.0066	0.1248	-0.001
6.5073e-06	17:13816081	17	13816081	rs9901268	genus.Lachnoclostridium.id.11308	G/A	A	0.0611093	4.5094	17332	TRUE	0.101056	0.0224102	A	-0.0109	0.0091	0.0645	-0.0109
5.5829e-06	17:46694541	17	46694541	rs72829893	genus.Lachnoclostridium.id.11308	T/G	G	0.0511915	4.5418	12404	FALSE	0.130732	0.0287843	T	0.017	0.0098	0.9487	-0.017
3.9766e-06	18:1053252	18	1053252	rs789029	genus.Lachnoclostridium.id.11308	T/C	C	0.173012	-4.6124	18055	FALSE	-0.0641313	0.0139041	T	-0.0137	0.0057	0.8273	0.0137
7.6483e-06	18:19743455	18	19743455	rs2385421	genus.Lachnoclostridium.id.11308	G/A	A	0.0792899	4.475	18036	TRUE	0.0871559	0.0194762	A	0.0098	0.0082	0.079	0.0098
8.7254e-07	20:19261922	20	19261922	rs3790176	genus.Lachnoclostridium.id.11308	A/G	A	0.341961	-4.9183	17965	TRUE	-0.0546613	0.0111139	A	0.0023	0.0045	0.3425	0.0023
2.9625e-06	1:53773248	1	53773248	rs78848836	genus.LachnospiraceaeUCG001.id.11321	G/A	A	0.0917619	-4.6732	9614	TRUE	-0.116607	0.0249522	A	0.0011	0.0077	0.0893	0.0011
2.1414e-06	1:82370104	1	82370104	rs7514224	genus.LachnospiraceaeUCG001.id.11321	A/C	C	0.261673	4.7396	10255	FALSE	0.0752107	0.0158686	A	0.0039	0.0049	0.7417	-0.0039
5.6607e-08	3:42568440	3	42568440	rs437876	genus.LachnospiraceaeUCG001.id.11321	C/T	T	0.370689	5.4292	10258	TRUE	0.0783662	0.0144342	T	0.0014	0.0045	0.3779	0.0014
2.0022e-06	3:148262218	3	148262218	rs6769749	genus.LachnospiraceaeUCG001.id.11321	A/G	A	0.192447	4.7533	10026	TRUE	0.0850524	0.0178933	A	0.0093	0.0055	0.1929	0.0093
6.2722e-06	5:72512825	5	72512825	rs115657146	genus.LachnospiraceaeUCG001.id.11321	C/T	T	0.0702539	-4.5168	9224	TRUE	-0.129975	0.0287759	T	-0.001	0.0087	0.0691	-0.001
9.4146e-06	6:90067072	6	90067072	rs12209311	genus.LachnospiraceaeUCG001.id.11321	T/C	C	0.0859929	4.4302	9495	FALSE	0.114553	0.0258573	T	0.0007	0.0081	0.9167	-0.0007
9.2329e-06	6:145004128	6	145004128	rs9373421	genus.LachnospiraceaeUCG001.id.11321	T/C	C	0.101659	4.4345	10204	FALSE	0.10262	0.0231413	T	-0.0024	0.0071	0.8977	0.0024
7.5912e-06	7:96964759	7	96964759	rs6956068	genus.LachnospiraceaeUCG001.id.11321	A/C	C	0.237532	-4.4764	10258	FALSE	-0.0733647	0.0163892	A	-0.0035	0.0051	0.762	0.0035
1.8923e-06	9:7273249	9	7273249	rs10815577	genus.LachnospiraceaeUCG001.id.11321	G/C	C	0.395848	-4.7644	10257	TRUE	-0.0679463	0.0142612	C	-0.0113	0.0044	0.3957	-0.0113
5.1349e-06	9:14475352	9	14475352	rs501463	genus.LachnospiraceaeUCG001.id.11321	C/T	T	0.0903698	-4.5592	10258	TRUE	-0.110907	0.024326	T	-0.004	0.0075	0.0901	-0.004
8.0896e-06	12:56256262	12	56256262	rs2371284	genus.LachnospiraceaeUCG001.id.11321	T/C	T	0.225698	-4.4628	10069	TRUE	-0.0751538	0.0168401	T	0	0.0052	0.221	0
9.6175e-06	14:21455912	14	21455912	rs4982387	genus.LachnospiraceaeUCG001.id.11321	C/T	C	0.335657	-4.4255	10069	FALSE	-0.0659763	0.0149082	T	-0.0076	0.0046	0.6627	0.0076
5.7168e-06	16:79087215	16	79087215	rs80219526	genus.LachnospiraceaeUCG001.id.11321	G/T	T	0.0476017	4.5368	5265	TRUE	0.207237	0.0456792	T	0.0032	0.0102	0.0477	0.0032
3.1042e-06	17:36155074	17	36155074	rs7213933	genus.LachnospiraceaeUCG001.id.11321	A/T	T	0.182764	-4.6636	10069	FALSE	-0.0849426	0.018214	A	0.0068	0.0056	0.8159	-0.0068
2.4242e-06	1:14730725	1	14730725	rs12031559	genus.RuminococcaceaeUCG002.id.11360	C/T	T	0.151269	-4.7144	17225	TRUE	-0.0708422	0.0150268	T	0.0063	0.0062	0.1518	0.0063
6.1027e-06	2:45178830	2	45178830	rs72874194	genus.RuminococcaceaeUCG002.id.11360	C/G	G	0.109992	-4.5227	16784	FALSE	-0.0788484	0.0174339	C	-0.0101	0.0069	0.8886	0.0101
8.2343e-06	3:24037673	3	24037673	rs6550828	genus.RuminococcaceaeUCG002.id.11360	C/T	T	0.241694	-4.459	17230	TRUE	-0.0560756	0.0125758	T	-0.0066	0.0051	0.2419	-0.0066
1.9805e-06	4:12207874	4	12207874	rs67746927	genus.RuminococcaceaeUCG002.id.11360	G/C	C	0.429921	-4.7554	16784	TRUE	-0.0523926	0.0110175	C	-0.0016	0.0044	0.4341	-0.0016
4.6276e-06	5:123816089	5	123816089	rs4457071	genus.RuminococcaceaeUCG002.id.11360	T/C	C	0.274336	-4.581	17230	FALSE	-0.0552751	0.0120662	T	0.0032	0.0048	0.7231	-0.0032
7.4503e-06	9:20131746	9	20131746	rs10964441	genus.RuminococcaceaeUCG002.id.11360	A/G	G	0.0517013	-4.4804	5346	FALSE	-0.195322	0.0435947	A	-0.0175	0.0098	0.9486	0.0175
9.2672e-06	10:73805399	10	73805399	rs16929573	genus.RuminococcaceaeUCG002.id.11360	A/G	G	0.0911432	4.4338	16784	FALSE	0.0840329	0.0189528	A	-0.0016	0.0074	0.9078	0.0016
7.4923e-06	11:43344751	11	43344751	rs11607472	genus.RuminococcaceaeUCG002.id.11360	G/A	A	0.11116	-4.4791	16415	TRUE	-0.0785966	0.0175474	A	-0.0066	0.0068	0.1132	-0.0066
2.9281e-06	11:86335459	11	86335459	rs7120052	genus.RuminococcaceaeUCG002.id.11360	C/A	A	0.173382	4.6758	17230	TRUE	0.0664919	0.0142204	A	0.0125	0.0056	0.1762	0.0125
5.3037e-06	11:111583609	11	111583609	rs117226190	genus.RuminococcaceaeUCG002.id.11360	C/G	G	0.0659621	-4.5522	10743	FALSE	-0.124996	0.0274583	C	0.0131	0.009	0.9341	-0.0131
6.4046e-07	12:47384118	12	47384118	rs55793120	genus.RuminococcaceaeUCG002.id.11360	C/T	T	0.0593661	4.9787	11802	TRUE	0.13699	0.0275152	T	0.0039	0.0094	0.0609	0.0039
7.1491e-06	12:129451330	12	129451330	rs7342369	genus.RuminococcaceaeUCG002.id.11360	A/C	C	0.326017	-4.4891	16784	FALSE	-0.0522386	0.0116368	A	0.0056	0.0046	0.6723	-0.0056
6.5813e-06	14:77489258	14	77489258	rs12434503	genus.RuminococcaceaeUCG002.id.11360	A/G	G	0.334043	4.5069	17222	FALSE	0.0514566	0.0114173	A	0.0069	0.0046	0.6636	-0.0069
3.4948e-07	15:80713184	15	80713184	rs77564310	genus.RuminococcaceaeUCG002.id.11360	C/A	A	0.199076	-5.0944	17133	TRUE	-0.0688696	0.0135187	A	0.002	0.0054	0.1966	0.002
7.5134e-06	19:54473054	19	54473054	rs28620610	genus.RuminococcaceaeUCG002.id.11360	G/A	G	0.374595	-4.4785	17121	FALSE	-0.0499732	0.0111585	A	-0.0073	0.0045	0.6251	0.0073
7.2301e-06	1:13794594	1	13794594	rs3013089	genus.RuminococcaceaeUCG003.id.11361	A/G	G	0.402955	-4.4868	14530	FALSE	-0.0536237	0.0119514	A	-0.0028	0.0044	0.5954	0.0028
4.6989e-06	2:37904904	2	37904904	rs6757232	genus.RuminococcaceaeUCG003.id.11361	A/T	T	0.2425	-4.5776	14126	FALSE	-0.0634957	0.013871	A	0.0012	0.0051	0.7605	-0.0012
2.4747e-06	2:205230264	2	205230264	rs57120461	genus.RuminococcaceaeUCG003.id.11361	C/G	G	0.0758094	4.7104	14532	FALSE	0.104305	0.0221436	C	0.0077	0.0081	0.9235	-0.0077
7.5912e-06	3:41982393	3	41982393	rs78720113	genus.RuminococcaceaeUCG003.id.11361	G/A	A	0.0718013	-4.4764	13078	TRUE	-0.107133	0.0239329	A	-0.004	0.0087	0.071	-0.004
7.8366e-06	6:105765509	6	105765509	rs1149320	genus.RuminococcaceaeUCG003.id.11361	G/C	G	0.130554	4.4696	14531	FALSE	0.0777663	0.0173989	C	0.0008	0.0063	0.8658	-0.0008
2.8298e-06	7:51530201	7	51530201	rs1917270	genus.RuminococcaceaeUCG003.id.11361	C/T	T	0.0491895	-4.6828	7696	TRUE	-0.174284	0.0372179	T	-0.0046	0.0099	0.0504	-0.0046
9.9067e-06	7:97338452	7	97338452	rs2523138	genus.RuminococcaceaeUCG003.id.11361	G/A	G	0.375658	-4.4191	14531	FALSE	-0.0534899	0.0121043	A	0.0072	0.0045	0.6234	-0.0072
3.0237e-06	8:82026852	8	82026852	rs4452755	genus.RuminococcaceaeUCG003.id.11361	C/A	A	0.279139	-4.6691	14528	TRUE	-0.0610174	0.0130683	A	0.002	0.0048	0.2777	0.002
5.2187e-06	9:134267022	9	134267022	rs67401159	genus.RuminococcaceaeUCG003.id.11361	A/G	G	0.0739324	-4.5557	13451	FALSE	-0.106069	0.0232827	A	-0.0125	0.0083	0.9241	0.0125
8.2728e-06	10:44640925	10	44640925	rs113336822	genus.RuminococcaceaeUCG003.id.11361	T/A	T	0.0503834	4.4581	7048	FALSE	0.171424	0.0384523	A	-0.0027	0.01	0.9514	0.0027
3.0952e-06	12:75494517	12	75494517	rs2061406	genus.RuminococcaceaeUCG003.id.11361	G/A	A	0.163308	4.6645	14432	TRUE	0.0742187	0.0159114	A	-0.0036	0.0058	0.1646	-0.0036
9.1816e-06	14:56208747	14	56208747	rs61977762	genus.RuminococcaceaeUCG003.id.11361	C/T	T	0.0659505	-4.4356	9111	TRUE	-0.132249	0.0298153	T	0.0043	0.0095	0.0635	0.0043
2.2254e-06	15:35071718	15	35071718	rs16959793	genus.RuminococcaceaeUCG003.id.11361	C/A	A	0.275907	-4.7317	14534	TRUE	-0.0620436	0.0131123	A	0.0016	0.0048	0.275	0.0016
4.4666e-06	18:46485154	18	46485154	rs4629039	genus.RuminococcaceaeUCG003.id.11361	T/A	T	0.354686	4.5885	14526	FALSE	0.056229	0.0122543	A	0.0064	0.0046	0.6466	-0.0064
4.5268e-06	19:49206108	19	49206108	rs679574	genus.RuminococcaceaeUCG003.id.11361	G/C	G	0.503466	4.5857	14534	FALSE	0.0537557	0.0117225	C	0.0008	0.0043	0.4968	-0.0008
8.6674e-06	22:25292719	22	25292719	rs139730	genus.RuminococcaceaeUCG003.id.11361	C/G	G	0.280858	-4.4478	14126	FALSE	-0.0588391	0.0132288	C	0.0125	0.0049	0.7155	-0.0125
5.2038e-06	1:247579710	1	247579710	rs72553859	genus.Sellimonas.id.14369	C/G	G	0.167029	-4.5564	3202	FALSE	-0.152153	0.0333934	C	-0.0018	0.0058	0.8341	0.0018
9.4058e-06	2:180277875	2	180277875	rs6433790	genus.Sellimonas.id.14369	T/C	C	0.223122	-4.4303	3143	FALSE	-0.133797	0.0302004	T	-0.0059	0.0052	0.7718	0.0059
2.4578e-06	2:213208256	2	213208256	rs6754674	genus.Sellimonas.id.14369	T/G	T	0.529136	4.7116	3202	TRUE	0.117547	0.0249484	T	-0.012	0.0043	0.5292	-0.012
3.6567e-06	3:41753319	3	41753319	rs73069357	genus.Sellimonas.id.14369	T/G	G	0.137401	-4.6299	3202	FALSE	-0.167493	0.0361765	T	-0.0074	0.0062	0.8619	0.0074
9.9067e-06	4:162924622	4	162924622	rs6854114	genus.Sellimonas.id.14369	A/C	C	0.198163	4.4193	3202	FALSE	0.138119	0.0312536	A	0.0019	0.0054	0.8007	-0.0019
5.977e-06	6:93730393	6	93730393	rs553697	genus.Sellimonas.id.14369	C/T	T	0.171121	-4.5271	3095	TRUE	-0.152281	0.0336375	T	0.0065	0.0059	0.1697	0.0065
9.752e-06	6:120450073	6	120450073	rs17641154	genus.Sellimonas.id.14369	C/T	T	0.104283	4.4227	3004	TRUE	0.186089	0.0420759	T	-0.0065	0.0073	0.1034	-0.0065
5.6415e-06	7:111501524	7	111501524	rs56203279	genus.Sellimonas.id.14369	C/T	T	0.319335	-4.5393	3202	TRUE	-0.121278	0.0267172	T	0.003	0.0046	0.318	0.003
7.8586e-06	10:55251498	10	55251498	rs452199	genus.Sellimonas.id.14369	C/T	C	0.372813	-4.469	3200	FALSE	-0.115166	0.02577	T	0.0048	0.0045	0.6303	-0.0048
2.2144e-06	11:79332972	11	79332972	rs2187447	genus.Sellimonas.id.14369	C/A	A	0.0693147	4.7328	3076	TRUE	0.236712	0.0500152	A	-0.0033	0.0088	0.0678	-0.0033
6.8725e-06	15:52078812	15	52078812	rs2606147	genus.Sellimonas.id.14369	A/G	A	0.394903	-4.4975	3202	TRUE	-0.114609	0.0254829	A	0.0061	0.0044	0.391	0.0061
3.4807e-06	2:218215828	2	218215828	rs4347803	genus.Subdoligranulum.id.2070	A/G	A	0.0428676	4.6403	4312	TRUE	0.24607	0.053029	A	-0.0002	0.0107	0.0425	-0.0002
9.3017e-06	2:232408743	2	232408743	rs1667315	genus.Subdoligranulum.id.2070	A/G	G	0.430826	4.4329	17719	FALSE	0.0475269	0.0107214	A	0.0018	0.0044	0.568	-0.0018
9.2931e-06	3:62246422	3	62246422	rs875423	genus.Subdoligranulum.id.2070	G/A	A	0.500041	4.4331	17724	TRUE	0.0470653	0.0106168	A	0.0014	0.0043	0.4989	0.0014
9.9895e-06	3:183716408	3	183716408	rs76664262	genus.Subdoligranulum.id.2070	A/T	T	0.0989187	4.4175	16845	FALSE	0.0805663	0.018238	A	0.0046	0.0074	0.9011	-0.0046
5.014e-06	4:48979085	4	48979085	rs2572356	genus.Subdoligranulum.id.2070	A/G	G	0.318398	-4.564	17298	FALSE	-0.0526406	0.0115339	A	-0.0004	0.0047	0.6701	0.0004
8.579e-06	5:4669958	5	4669958	rs7723123	genus.Subdoligranulum.id.2070	C/T	T	0.0849643	-4.45	17724	TRUE	-0.0847197	0.0190381	T	-0.009	0.0077	0.0865	-0.009
9.7791e-06	5:117793701	5	117793701	rs72793514	genus.Subdoligranulum.id.2070	A/G	G	0.0448945	-4.4219	8468	FALSE	-0.163901	0.0370656	A	0.0087	0.0104	0.9553	-0.0087
1.9302e-06	5:141854163	5	141854163	rs11167777	genus.Subdoligranulum.id.2070	C/A	C	0.494338	-4.7605	17724	FALSE	-0.0505402	0.0106166	A	0.0025	0.0043	0.505	-0.0025
6.6686e-06	6:153694029	6	153694029	rs2171249	genus.Subdoligranulum.id.2070	T/C	C	0.0786972	4.5041	14812	FALSE	0.0971199	0.0215625	T	0.0099	0.0085	0.9219	-0.0099
4.1445e-06	10:125472862	10	125472862	rs2114678	genus.Subdoligranulum.id.2070	A/G	G	0.0543744	-4.6039	15699	FALSE	-0.114505	0.0248713	A	-0.0041	0.0093	0.9422	0.0041
6.3556e-06	14:86932036	14	86932036	rs72695075	genus.Subdoligranulum.id.2070	A/G	G	0.349836	-4.5141	17706	FALSE	-0.0502693	0.0111361	A	0.0075	0.0045	0.6474	-0.0075
5.4261e-06	19:29644694	19	29644694	rs75158211	genus.Subdoligranulum.id.2070	C/T	T	0.128132	-4.5474	17298	TRUE	-0.0731032	0.0160758	T	0.0116	0.0065	0.1275	0.0116
4.8772e-06	22:49637741	22	49637741	rs2688143	genus.Subdoligranulum.id.2070	T/C	T	0.274921	4.5701	17724	TRUE	0.0543347	0.0118892	T	-0.0072	0.0049	0.2766	-0.0072
6.5442e-06	1:147291928	1	147291928	rs78250280	genus.Eubacteriumventriosumgroup.id.11341	A/G	G	0.1545	4.5081	14967	FALSE	0.0720436	0.0159809	A	-0.0076	0.0061	0.8455	0.0076
6.9049e-06	1:109398264	1	109398264	rs66746423	genus.Eubacteriumventriosumgroup.id.11341	T/C	C	0.1452	4.4967	14710	FALSE	0.0743633	0.0165373	T	0.0015	0.0061	0.8548	-0.0015
7.9324e-06	2:203661779	2	203661779	rs6704822	genus.Eubacteriumventriosumgroup.id.11341	G/A	A	0.1358	4.4672	15421	TRUE	0.0742038	0.0166108	A	0.0016	0.0063	0.1358	0.0016
5.7168e-06	4:126371814	4	126371814	rs73849225	genus.Eubacteriumventriosumgroup.id.11341	T/C	T	0.0655	4.5368	14705	TRUE	0.106853	0.0235526	T	-0.0143	0.0087	0.0655	-0.0143
6.866e-06	5:154389411	5	154389411	rs17116707	genus.Eubacteriumventriosumgroup.id.11341	C/T	T	0.0957	4.498	14712	TRUE	0.0890754	0.0198033	T	0.0128	0.0073	0.0957	0.0128
2.1478e-06	8:114445055	8	114445055	rs16884680	genus.Eubacteriumventriosumgroup.id.11341	T/G	G	0.0951	-4.7389	15421	FALSE	-0.0919178	0.0193964	T	0.0068	0.0074	0.9049	-0.0068
2.6067e-06	12:52423996	12	52423996	rs876734	genus.Eubacteriumventriosumgroup.id.11341	C/T	C	0.2581	-4.6995	15045	FALSE	-0.0618665	0.0131645	T	0.0018	0.0051	0.7419	-0.0018
7.6929e-07	13:98785900	13	98785900	rs11617697	genus.Eubacteriumventriosumgroup.id.11341	G/A	A	0.0491	-4.9429	11629	TRUE	-0.149841	0.0303145	A	-0.0165	0.0101	0.0491	-0.0165
3.931e-06	14:44975510	14	44975510	rs3809430	genus.Eubacteriumventriosumgroup.id.11341	T/C	T	0.3745	-4.6149	15419	TRUE	-0.05426	0.0117576	T	0.0023	0.0044	0.3745	0.0023
5.0092e-06	16:60348381	16	60348381	rs72783037	genus.Eubacteriumventriosumgroup.id.11341	A/C	C	0.1998	4.5645	15418	FALSE	0.0649642	0.0142325	A	0.0014	0.0054	0.8002	-0.0014
2.4554e-06	18:22460785	18	22460785	rs12964517	genus.Eubacteriumventriosumgroup.id.11341	A/G	G	0.3256	4.712	15421	FALSE	0.0572164	0.0121427	A	-0.0073	0.0046	0.6744	0.0073
4.1926e-07	20:50140919	20	50140919	rs73615400	genus.Eubacteriumventriosumgroup.id.11341	C/T	T	0.0905	-5.0598	15278	TRUE	-0.100808	0.0199234	T	0.0053	0.0077	0.0905	0.0053

## Sheet: Supplementary Table 3
Complete results of microbiome association analysis in RS
Pheno	Taxon	Beta	Se	zscore	p	n	resi.corr	fdr
CESD	family.Christensenellaceae.id.1866	-0.587686	0.115772	-5.07626	4.55785e-07	1054	0.898637	8.04461e-05
CESD	genus.ChristensenellaceaeR7group.id.11283	-0.553253	0.107679	-5.13798	3.3145e-07	1054	0.898996	8.04461e-05
CESD	genus.RuminococcaceaeUCG005.id.11363	-0.587236	0.134349	-4.37097	1.36096e-05	1054	0.897729	0.00156558
CESD	genus.RuminococcaceaeUCG010.id.11367	-0.500027	0.11597	-4.31168	1.77403e-05	1054	0.895816	0.00156558
CESD	family.Ruminococcaceae.id.2050	-1.58826	0.375196	-4.23313	2.50805e-05	1054	0.896173	0.00177068
CESD	genus.Coprococcus2.id.11302	-0.293623	0.0804232	-3.65098	0.000274232	1054	0.897978	0.0102993
CESD	genus.FamilyXIIIAD3011group.id.11293	-0.736026	0.20059	-3.6693	0.000255544	1054	0.894151	0.0102993
CESD	genus.Lachnoclostridium.id.11308	0.5746	0.158806	3.61825	0.000310852	1054	0.895258	0.0102993
CESD	genus.RuminococcaceaeUCG002.id.11360	-0.41946	0.116198	-3.60987	0.000320941	1054	0.894758	0.0102993
CESD	genus.RuminococcaceaeUCG003.id.11361	-0.513921	0.146229	-3.51449	0.000459553	1054	0.896574	0.0132867
CESD	class.Mollicutes.id.3920	-0.385348	0.115324	-3.34145	0.000863042	1054	0.895093	0.0138479
CESD	genus.Eggerthella.id.819	0.65134	0.189924	3.42947	0.000628457	1054	0.896031	0.0138479
CESD	genus.Hungatella.id.11306	0.765731	0.224524	3.41046	0.000673427	1054	0.896677	0.0138479
CESD	genus.Ruminiclostridium6.id.11356	-0.360869	0.105154	-3.43181	0.00062314	1054	0.894813	0.0138479
CESD	genus.RuminococcaceaeUCG014.id.11371	-0.285341	0.0825605	-3.45614	0.000570081	1054	0.894421	0.0138479
CESD	order.MollicutesRF9.id.11579	-0.40037	0.119401	-3.35315	0.000827753	1054	0.89503	0.0138479
CESD	phylum.Tenericutes.id.3919	-0.385348	0.115324	-3.34145	0.000863042	1054	0.895093	0.0138479
CESD	genus.Coprococcus3.id.11303	-0.429932	0.129224	-3.32702	0.00090851	1054	0.896022	0.0139437
CESD	genus.LachnospiraceaeUCG001.id.11321	-0.522231	0.158371	-3.29751	0.00100845	1054	0.896874	0.0148327
CESD	family.FamilyXIII.id.1957	-0.735605	0.227392	-3.23496	0.00125491	1054	0.893607	0.0171074
CESD	family.Micrococcaceae.id.636	1.52703	0.472213	3.23378	0.00126004	1054	0.896083	0.0171074
CESD	genus..Ruminococcusgauvreauiigroup.id.11342	-0.341479	0.107516	-3.17609	0.00153665	1054	0.896151	0.0200902
CESD	genus..Eubacteriumventriosumgroup.id.11341	-0.485036	0.157248	-3.08453	0.00209252	1054	0.895736	0.0246982
CESD	genus.Sellimonas.id.14369	0.567467	0.184028	3.0836	0.002099	1054	0.893083	0.0246982
CESD	genus.Rothia.id.646	1.46553	0.477761	3.0675	0.00221435	1054	0.895325	0.025215
CESD	order.Micrococcales.id.510	1.40825	0.46609	3.02142	0.0025774	1054	0.895424	0.0284319
CESD	genus.LachnospiraceaeNK4A136group.id.11319	-0.412099	0.137526	-2.99652	0.00279552	1054	0.896752	0.0299036
CESD	genus.Subdoligranulum.id.2070	-0.438545	0.149172	-2.93985	0.00335623	1054	0.89405	0.0348455
CESD	genus.RuminococcaceaeNK4A214group.id.11358	-0.344862	0.121622	-2.83552	0.00466372	1054	0.893002	0.047037
CESD	genus.PrevotellaceaeUCG001.id.11186	-0.487332	0.172446	-2.82599	0.00480361	1054	0.894764	0.047102
CESD	genus..Eubacteriumxylanophilumgroup.id.14375	-0.369338	0.131678	-2.80487	0.00512736	1054	0.89515	0.0489178
CESD	genus.FamilyXIIIUCG001.id.11294	-0.478187	0.176373	-2.71123	0.00681375	1054	0.894118	0.0632961
CESD	genus..Eubacteriumcoprostanoligenesgroup.id.11375	-0.44839	0.166262	-2.69689	0.00711196	1054	0.89183	0.0643724
CESD	genus..Eubacteriumoxidoreducensgroup.id.11339	-0.526945	0.197756	-2.66462	0.00782661	1054	0.893097	0.0690699
CESD	genus.Senegalimassilia.id.11160	-0.326097	0.127131	-2.56506	0.0104551	1054	0.893166	0.0878726
CESD	genus.Fusobacterium.id.2210	1.06666	0.421628	2.52985	0.0115576	1054	0.895912	0.0948798
CESD	genus.LachnospiraceaeNC2004group.id.11316	-0.484719	0.192571	-2.51709	0.0119822	1054	0.893485	0.0961295
CESD	genus.Butyrivibrio.id.1993	-0.247953	0.099547	-2.49081	0.0129001	1054	0.894634	0.101194
CESD	genus.RikenellaceaeRC9gutgroup.id.11191	-0.409868	0.165206	-2.48095	0.0132603	1054	0.893448	0.101758
CESD	genus..Eubacteriumrectalegroup.id.14374	-0.264099	0.110447	-2.39118	0.016971	1054	0.894973	0.124808
CESD	genus.Pediococcus.id.1838	1.119	0.467147	2.39539	0.0167788	1054	0.893502	0.124808
CESD	genus..Eubacteriumruminantiumgroup.id.11340	-0.23581	0.0991824	-2.37754	0.0176083	1054	0.894674	0.126851
CESD	genus.Rikenella.id.973	1.25611	0.531867	2.3617	0.0183746	1054	0.893785	0.127911
CESD	genus..Ruminococcusgnavusgroup.id.14376	0.279551	0.118476	2.35957	0.0184801	1054	0.892686	0.127911
CESD	family.Fusobacteriaceae.id.2208	0.944319	0.401603	2.35137	0.0188899	1054	0.895365	0.128233
CESD	genus.RuminococcaceaeUCG013.id.11370	-0.423571	0.18087	-2.34185	0.0193761	1054	0.894291	0.129052
CESD	family.Eubacteriaceae.id.1928	0.715106	0.312461	2.28862	0.0223009	1054	0.893079	0.139836
CESD	family.FamilyXI.id.1732	1.41469	0.617051	2.29266	0.0220661	1054	0.894626	0.139836
CESD	genus.Gemella.id.1733	1.41469	0.617051	2.29266	0.0220661	1054	0.894626	0.139836
CESD	genus.Flavonifractor.id.2059	0.454883	0.200142	2.2728	0.0232416	1054	0.893566	0.141453
CESD	genus.Oscillibacter.id.2063	-0.588181	0.262844	-2.23776	0.0254479	1054	0.893743	0.152256
CESD	genus.Anaerofustis.id.1931	0.883793	0.400539	2.20651	0.0275661	1054	0.893033	0.162181
CESD	genus.Anaerococcus.id.1937	2.01738	0.921045	2.19031	0.0287226	1054	0.893997	0.165111
CESD	genus.Coprococcus1.id.11301	-0.499872	0.228616	-2.18652	0.0289997	1054	0.893799	0.165111
CESD	family.Peptococcaceae.id.2024	-0.311448	0.143291	-2.17353	0.0299649	1054	0.894162	0.165275
CESD	genus.Enterorhabdus.id.820	-0.322178	0.148134	-2.17491	0.0298618	1054	0.893119	0.165275
CESD	genus.Ruminococcus1.id.11373	-0.240425	0.11249	-2.13731	0.0328053	1054	0.893182	0.178158
CESD	genus..Eubacteriumbrachygroup.id.11296	0.489993	0.231098	2.12028	0.0342183	1054	0.894067	0.183016
CESD	genus.RuminococcaceaeUCG011.id.11368	-0.536202	0.261427	-2.05105	0.0405115	1054	0.893308	0.210302
CESD	genus..Eubacteriumfissicatenagroup.id.14373	0.628814	0.310918	2.02244	0.0433861	1054	0.892928	0.221961
CESD	genus.Faecalibacterium.id.2057	-0.290326	0.146194	-1.9859	0.0473066	1054	0.89409	0.23856
CESD	class.Alphaproteobacteria.id.2379	-0.257201	0.133893	-1.92095	0.0550115	1054	0.893117	0.269709
CESD	genus.Peptoclostridium.id.11346	1.24636	0.648699	1.92132	0.0549646	1054	0.891669	0.269709
CESD	genus.Roseburia.id.2012	-0.337737	0.176546	-1.91302	0.0560198	1054	0.893809	0.27089
CESD	class.Bacilli.id.1673	0.214276	0.116879	1.83331	0.0670426	1054	0.891571	0.281564
CESD	class.Fusobacteriia.id.2204	0.70737	0.385405	1.83539	0.0667324	1054	0.894216	0.281564
CESD	family.Anaeroplasmataceae.id.3925	-0.441167	0.242006	-1.82296	0.0685962	1054	0.892587	0.281564
CESD	family.Rhodospirillaceae.id.2717	-0.25044	0.134597	-1.86066	0.0630737	1054	0.892905	0.281564
CESD	genus.Anaeroplasma.id.3926	-0.441167	0.242006	-1.82296	0.0685962	1054	0.892587	0.281564
CESD	genus.Megamonas.id.2184	-0.417769	0.226148	-1.84733	0.0649829	1054	0.892498	0.281564
CESD	order.Anaeroplasmatales.id.3924	-0.441167	0.242006	-1.82296	0.0685962	1054	0.892587	0.281564
CESD	order.Fusobacteriales.id.2205	0.70737	0.385405	1.83539	0.0667324	1054	0.894216	0.281564
CESD	order.Lactobacillales.id.1800	0.214966	0.116152	1.85074	0.0644905	1054	0.891392	0.281564
CESD	order.Rhodospirillales.id.2667	-0.251601	0.134706	-1.86778	0.0620736	1054	0.892949	0.281564
CESD	phylum.Fusobacteria.id.2203	0.70737	0.385405	1.83539	0.0667324	1054	0.894216	0.281564
CESD	genus..Clostridiuminnocuumgroup.id.14397	0.542149	0.298422	1.81672	0.0695476	1054	0.892467	0.282187
CESD	family.Streptococcaceae.id.1850	0.205769	0.113905	1.8065	0.0711283	1054	0.891129	0.285321
CESD	genus.LachnospiraceaeUCG010.id.11330	-0.279805	0.155841	-1.79545	0.0728721	1054	0.892534	0.289032
CESD	genus.Streptococcus.id.1853	0.1998	0.112188	1.78095	0.0752129	1054	0.89104	0.295002
CESD	genus..Bacteroidespectinophilusgroup.id.14371	-0.389757	0.221025	-1.76341	0.0781252	1054	0.892689	0.296934
CESD	genus.Collinsella.id.815	-0.200038	0.114118	-1.75291	0.0799115	1054	0.892142	0.296934
CESD	genus.RuminococcaceaeUCG007.id.11364	-0.537775	0.306432	-1.75496	0.0795604	1054	0.89291	0.296934
CESD	genus.Tyzzerella4.id.11336	0.404188	0.229591	1.76047	0.078622	1054	0.892848	0.296934
CESD	genus.Tyzzerella.id.11334	0.41212	0.232685	1.77115	0.0768283	1054	0.893226	0.296934
CESD	genus.Marvinbryantia.id.2005	-0.284746	0.163406	-1.74256	0.081705	1054	0.892063	0.300436
CESD	genus.Turicibacter.id.2162	0.207672	0.120053	1.72983	0.0839566	1054	0.891643	0.305533
CESD	genus.Eisenbergiella.id.11304	0.348435	0.208492	1.67122	0.0949788	1054	0.892404	0.339707
CESD	genus.Faecalitalea.id.11392	0.487436	0.291924	1.66974	0.095272	1054	0.891383	0.339707
CESD	genus.RuminococcaceaeUCG009.id.11366	-0.441263	0.265771	-1.66031	0.0971531	1054	0.892601	0.34295
CESD	genus.Ezakiella.id.11289	-1.02413	0.624607	-1.63965	0.101381	1054	0.892702	0.35433
CESD	genus.Gordonibacter.id.821	0.407232	0.262508	1.55132	0.12113	1054	0.8927	0.419204
CESD	genus..Eubacteriumeligensgroup.id.14372	-0.165	0.107566	-1.53395	0.125347	1054	0.893151	0.426714
CESD	genus.Klebsiella.id.3507	0.281634	0.18454	1.52614	0.12728	1054	0.892377	0.426714
CESD	genus.Peptococcus.id.2037	-0.208339	0.137076	-1.51988	0.128845	1054	0.89276	0.426714
CESD	genus.Scardovia.id.440	1.46211	0.966288	1.51312	0.130553	1054	0.890048	0.426714
CESD	order.Bacillales.id.1674	0.459714	0.303555	1.51443	0.130219	1054	0.89398	0.426714
CESD	phylum.Verrucomicrobia.id.3982	-0.17064	0.111919	-1.52468	0.127642	1054	0.893505	0.426714
CESD	genus.Anaerosporobacter.id.1990	0.59038	0.391679	1.50731	0.132036	1054	0.891691	0.427602
CESD	family.BacteroidalesS247group.id.11173	-0.136703	0.0927865	-1.47331	0.14097	1054	0.892485	0.448308
CESD	class.Clostridia.id.1859	-1.08167	0.754774	-1.4331	0.152129	1054	0.892651	0.467731
CESD	genus.Paraprevotella.id.962	-0.148929	0.103484	-1.43915	0.150409	1054	0.892864	0.467731
CESD	genus.Veillonella.id.2198	0.260009	0.181285	1.43425	0.1518	1054	0.890703	0.467731
CESD	order.Clostridiales.id.1863	-1.08071	0.754564	-1.43223	0.152377	1054	0.892651	0.467731
CESD	class.Verrucomicrobiae.id.4029	-0.156591	0.111288	-1.40708	0.159702	1054	0.893213	0.467907
CESD	family.Verrucomicrobiaceae.id.4036	-0.156591	0.111288	-1.40708	0.159702	1054	0.893213	0.467907
CESD	genus.Akkermansia.id.4037	-0.156591	0.111288	-1.40708	0.159702	1054	0.893213	0.467907
CESD	genus.Intestinimonas.id.2062	-0.22534	0.16041	-1.40477	0.160387	1054	0.892725	0.467907
CESD	order.Verrucomicrobiales.id.4030	-0.156591	0.111288	-1.40708	0.159702	1054	0.893213	0.467907
CESD	family.ClostridialesvadinBB60group.id.11286	-0.197271	0.142681	-1.3826	0.167086	1054	0.892129	0.477274
CESD	class.Melainabacteria.id.1589	-0.239525	0.177107	-1.35244	0.17653	1054	0.892036	0.487183
CESD	family.Acidaminococcaceae.id.2166	-0.123658	0.092337	-1.33921	0.180796	1054	0.892603	0.487183
CESD	order.Gastranaerophilales.id.1591	-0.237831	0.177073	-1.34312	0.179525	1054	0.892032	0.487183
CESD	phylum.Cyanobacteria.id.1500	-0.23799	0.175831	-1.35352	0.176184	1054	0.892201	0.487183
CESD	genus.Alloscardovia.id.435	0.841309	0.631458	1.33233	0.183044	1054	0.891656	0.489504
CESD	genus.Intestinibacter.id.11345	0.132528	0.100611	1.31722	0.188054	1054	0.891028	0.49912
CESD	genus.Catabacter.id.11282	0.855276	0.674563	1.2679	0.205119	1054	0.891943	0.520913
CESD	genus.Granulicatella.id.1821	0.678778	0.535161	1.26836	0.204952	1054	0.892021	0.520913
CESD	genus.Ruminiclostridium1.id.11354	0.46611	0.362279	1.28661	0.198518	1054	0.893226	0.520913
CESD	genus.RuminococcaceaeUCG008.id.11365	-0.191147	0.149294	-1.28034	0.200709	1054	0.891965	0.520913
CESD	genus.Succiniclasticum.id.2169	-0.242155	0.18854	-1.28437	0.199299	1054	0.892623	0.520913
CESD	family.Defluviitaleaceae.id.1924	-0.292709	0.235187	-1.24458	0.213566	1054	0.89213	0.530906
CESD	genus.Adlercreutzia.id.812	0.201724	0.161751	1.24713	0.212631	1054	0.892618	0.530906
CESD	genus.Christensenella.id.1867	-0.858443	0.688935	-1.24604	0.213029	1054	0.892878	0.530906
CESD	class.Actinobacteria.id.419	0.132798	0.109254	1.2155	0.22445	1054	0.892405	0.532874
CESD	class.Deltaproteobacteria.id.3087	-0.152328	0.129114	-1.1798	0.23835	1054	0.891593	0.532874
CESD	family.Bifidobacteriaceae.id.433	0.117886	0.0999957	1.17891	0.238704	1054	0.892448	0.532874
CESD	family.Desulfovibrionaceae.id.3169	-0.152837	0.129178	-1.18314	0.237022	1054	0.891593	0.532874
CESD	family.Lactobacillaceae.id.1836	0.127234	0.107783	1.18046	0.238086	1054	0.892001	0.532874
CESD	family.Leuconostocaceae.id.1839	0.401403	0.339296	1.18305	0.23706	1054	0.891741	0.532874
CESD	genus.DefluviitaleaceaeUCG011.id.11287	-0.285445	0.236909	-1.20487	0.228526	1054	0.892098	0.532874
CESD	genus.LachnospiraceaeND3007group.id.11317	-0.161051	0.132923	-1.21161	0.225938	1054	0.891543	0.532874
CESD	genus.Lactobacillus.id.1837	0.127299	0.108284	1.17561	0.24002	1054	0.891973	0.532874
CESD	genus..Ruminococcustorquesgroup.id.14377	0.204875	0.170499	1.20162	0.229785	1054	0.893278	0.532874
CESD	genus.Staphylococcus.id.1780	0.713081	0.600932	1.18662	0.235646	1054	0.89269	0.532874
CESD	order.Bifidobacteriales.id.432	0.117886	0.0999957	1.17891	0.238704	1054	0.892448	0.532874
CESD	order.Desulfovibrionales.id.3156	-0.15247	0.12915	-1.18056	0.238045	1054	0.891593	0.532874
CESD	phylum.Saccharibacteria.id.11569	-0.347148	0.293386	-1.18325	0.236982	1054	0.892806	0.532874
CESD	genus.Corynebacterium.id.449	-1.44525	1.23919	-1.16628	0.243767	1054	0.891959	0.537811
CESD	genus.Bifidobacterium.id.436	0.11488	0.0995269	1.15426	0.24866	1054	0.892435	0.545198
CESD	genus.Anaerotruncus.id.2054	-0.186665	0.163251	-1.14342	0.253125	1054	0.891857	0.548179
CESD	genus.Papillibacter.id.2065	-0.576871	0.503147	-1.14653	0.251841	1054	0.891941	0.548179
CESD	genus.Megasphaera.id.2185	-0.204822	0.180766	-1.13308	0.257442	1054	0.892373	0.554129
CESD	genus.Prevotella2.id.11180	-0.193946	0.17295	-1.12139	0.262379	1054	0.892643	0.561332
CESD	genus.Pseudobutyrivibrio.id.2010	-0.254572	0.231059	-1.10176	0.270819	1054	0.892197	0.575899
CESD	family.Staphylococcaceae.id.1775	0.641884	0.593203	1.08206	0.279475	1054	0.892625	0.58146
CESD	family.vadinBE97.id.14446	-0.462242	0.427942	-1.08015	0.280326	1054	0.892451	0.58146
CESD	genus.LachnospiraceaeFCS020group.id.11314	-0.187332	0.173917	-1.07713	0.28167	1054	0.891513	0.58146
CESD	genus.Parvimonas.id.1945	0.799779	0.739356	1.08172	0.279626	1054	0.892096	0.58146
CESD	family.Prevotellaceae.id.960	-0.076306	0.0715474	-1.06651	0.28644	1054	0.892113	0.584471
CESD	genus.Epulopiscium.id.1998	-0.376901	0.352929	-1.06792	0.285803	1054	0.893401	0.584471
CESD	genus.Blautia.id.1992	0.238025	0.227192	1.04768	0.295027	1054	0.891944	0.598532
CESD	genus.Coprobacillus.id.2154	0.300789	0.293504	1.02482	0.305686	1054	0.89266	0.605763
CESD	genus.CoriobacteriaceaeUCG002.id.11158	0.471243	0.46137	1.0214	0.307303	1054	0.892294	0.605763
CESD	genus.Fusicatenibacter.id.11305	-0.132117	0.130235	-1.01445	0.310604	1054	0.891621	0.605763
CESD	genus.Lachnospira.id.2004	-0.131449	0.129392	-1.0159	0.309915	1054	0.89219	0.605763
CESD	genus.Mitsuokella.id.2186	-0.157376	0.153382	-1.02604	0.305109	1054	0.892217	0.605763
CESD	genus.Phascolarctobacterium.id.2168	-0.0927269	0.0912398	-1.0163	0.309723	1054	0.892333	0.605763
CESD	genus.LachnospiraceaeUCG003.id.11323	-0.255082	0.253162	-1.00758	0.313888	1054	0.892316	0.608805
CESD	genus.Desulfovibrio.id.3173	-0.123357	0.125039	-0.986549	0.324093	1054	0.89137	0.625163
CESD	genus.LachnospiraceaeAC2044group.id.11313	-1.05597	1.07961	-0.978103	0.32825	1054	0.891834	0.626337
CESD	genus.Prevotella6.id.11181	0.751725	0.767264	0.979747	0.327439	1054	0.892622	0.626337
CESD	genus.Bilophila.id.3170	-0.193941	0.203373	-0.953621	0.340497	1054	0.892014	0.63235
CESD	genus.Dialister.id.2183	0.0773191	0.0809603	0.955025	0.339787	1054	0.892203	0.63235
CESD	genus.Dorea.id.1997	-0.162816	0.17132	-0.950361	0.342149	1054	0.892027	0.63235
CESD	genus.Hydrogenoanaerobacterium.id.2060	-0.364569	0.380968	-0.956952	0.338813	1054	0.892258	0.63235
CESD	genus.Odoribacter.id.952	-0.152799	0.15808	-0.96659	0.333974	1054	0.891973	0.63235
CESD	genus.Ruminococcus2.id.11374	-0.0876754	0.0913885	-0.95937	0.337595	1054	0.8922	0.63235
CESD	phylum.Actinobacteria.id.400	0.166412	0.176658	0.941998	0.346412	1054	0.892429	0.636893
CESD	class.Coriobacteriia.id.809	-0.172854	0.191508	-0.902593	0.366951	1054	0.891451	0.641645
CESD	class.Epsilonproteobacteria.id.3268	-0.378552	0.4196	-0.902173	0.367174	1054	0.892316	0.641645
CESD	class.Opitutae.id.3988	-0.582254	0.629139	-0.925477	0.354932	1054	0.892117	0.641645
CESD	family.Coriobacteriaceae.id.811	-0.172854	0.191508	-0.902593	0.366951	1054	0.891451	0.641645
CESD	order.Campylobacterales.id.3272	-0.378552	0.4196	-0.902173	0.367174	1054	0.892316	0.641645
CESD	order.Coriobacteriales.id.810	-0.172854	0.191508	-0.902593	0.366951	1054	0.891451	0.641645
CESD	order.OpitutaevadinHA64.id.11585	-0.58247	0.632392	-0.921059	0.357233	1054	0.892111	0.641645
CESD	genus.Holdemanella.id.11393	-0.0820754	0.0931338	-0.881263	0.378379	1054	0.892355	0.657969
CESD	genus.CoriobacteriaceaeUCG003.id.11159	0.230502	0.26622	0.865835	0.38678	1054	0.892149	0.666016
CESD	genus.Tyzzerella3.id.11335	-0.126401	0.145672	-0.867712	0.385752	1054	0.891806	0.666016
CESD	genus.Ruminiclostridium5.id.11355	0.17743	0.208493	0.851011	0.394959	1054	0.892126	0.676799
CESD	genus.Dielma.id.11380	0.502247	0.594769	0.84444	0.398617	1054	0.891826	0.679768
CESD	genus.Peptoniphilus.id.1946	-0.743032	0.891533	-0.833432	0.404792	1054	0.891403	0.686979
CESD	family.Moraxellaceae.id.3710	-0.483231	0.589358	-0.819927	0.412445	1054	0.892177	0.693301
CESD	genus.Parabacteroides.id.954	-0.101599	0.125777	-0.807771	0.419407	1054	0.891611	0.701662
CESD	family.Peptostreptococcaceae.id.2042	0.0812016	0.103124	0.787415	0.431218	1054	0.891522	0.714155
CESD	genus.Leuconostoc.id.1841	0.347664	0.441651	0.787191	0.431349	1054	0.891864	0.714155
CESD	genus.Porphyromonas.id.956	-0.39464	0.503067	-0.784468	0.432944	1054	0.892057	0.714155
CESD	genus.Clostridiumsensustricto1.id.1873	-0.0742966	0.0967183	-0.768175	0.442557	1054	0.892604	0.71992
CESD	genus.Howardella.id.2000	-0.13178	0.170653	-0.772215	0.440162	1054	0.891798	0.71992
CESD	genus.Weissella.id.1843	0.373644	0.485178	0.770118	0.441405	1054	0.891748	0.71992
CESD	genus.Sutterella.id.2896	-0.0986605	0.129689	-0.760746	0.446981	1054	0.891853	0.723781
CESD	family.Lachnospiraceae.id.1987	0.313679	0.426505	0.735465	0.462222	1054	0.891969	0.725175
CESD	genus.Alloprevotella.id.961	0.0894046	0.120729	0.74054	0.459139	1054	0.892274	0.725175
CESD	genus.Erysipelatoclostridium.id.11381	0.123795	0.165323	0.748807	0.454143	1054	0.891873	0.725175
CESD	genus.ErysipelotrichaceaeUCG003.id.11384	-0.0826977	0.109538	-0.754969	0.450438	1054	0.891582	0.725175
CESD	genus.Methanobrevibacter.id.123	-0.22988	0.309083	-0.743748	0.457197	1054	0.891886	0.725175
CESD	genus.Prevotella.id.963	-0.280451	0.379795	-0.738427	0.460421	1054	0.89184	0.725175
CESD	genus.Pseudomonas.id.3723	0.407267	0.551552	0.738401	0.460437	1054	0.892312	0.725175
CESD	domain.Bacteria.id.3	438.744	621.045	0.70646	0.48006	1054	0.89182	0.730033
CESD	family.Clostridiaceae1.id.1869	-0.0686843	0.0966855	-0.710388	0.477622	1054	0.892528	0.730033
CESD	family.Pasteurellaceae.id.3689	-0.13108	0.183062	-0.716043	0.474125	1054	0.892013	0.730033
CESD	genus.Butyricicoccus.id.2055	-0.141026	0.200564	-0.703148	0.482121	1054	0.892028	0.730033
CESD	genus.LachnospiraceaeUCG004.id.11324	-0.10378	0.143868	-0.721354	0.470853	1054	0.892298	0.730033
CESD	genus.Parasutterella.id.2892	0.103349	0.147589	0.700244	0.483931	1054	0.891199	0.730033
CESD	genus.Prevotella9.id.11183	-0.0498382	0.0708553	-0.70338	0.481976	1054	0.891857	0.730033
CESD	order.Pasteurellales.id.3688	-0.13108	0.183062	-0.716043	0.474125	1054	0.892013	0.730033
CESD	genus.Butyricimonas.id.945	-0.119427	0.172911	-0.690685	0.489917	1054	0.892117	0.735919
CESD	genus.Eubacterium.id.1932	0.297294	0.435215	0.683098	0.494697	1054	0.89201	0.73995
CESD	class.Methanobacteria.id.119	-0.192481	0.302469	-0.636366	0.524678	1054	0.891869	0.743192
CESD	domain.Archaea.id.2	-0.192481	0.302469	-0.636366	0.524678	1054	0.891869	0.743192
CESD	family.Methanobacteriaceae.id.121	-0.192481	0.302469	-0.636366	0.524678	1054	0.891869	0.743192
CESD	family.Victivallaceae.id.2255	0.219115	0.343063	0.638701	0.523158	1054	0.892064	0.743192
CESD	genus.Alistipes.id.968	0.0816963	0.12615	0.647614	0.517378	1054	0.89205	0.743192
CESD	genus.CandidatusSoleaferrea.id.11350	-0.185268	0.2938	-0.630593	0.528445	1054	0.891859	0.743192
CESD	genus.Gelria.id.2134	-0.302318	0.460375	-0.656677	0.511534	1054	0.891885	0.743192
CESD	genus.Haemophilus.id.3698	-0.119195	0.183546	-0.6494	0.516223	1054	0.891985	0.743192
CESD	genus.Oribacterium.id.2008	0.324221	0.505187	0.641784	0.521154	1054	0.89245	0.743192
CESD	genus.Oscillospira.id.2064	-0.124602	0.187413	-0.664854	0.506291	1054	0.892114	0.743192
CESD	genus.Pseudoflavonifractor.id.2066	0.367791	0.579233	0.634962	0.525593	1054	0.892015	0.743192
CESD	genus.RuminococcaceaeV9D2013group.id.11372	0.44885	0.699703	0.641487	0.521348	1054	0.892363	0.743192
CESD	genus.Victivallis.id.2256	-0.298973	0.473236	-0.631762	0.527681	1054	0.891744	0.743192
CESD	order.Methanobacteriales.id.120	-0.192481	0.302469	-0.636366	0.524678	1054	0.891869	0.743192
CESD	phylum.Euryarchaeota.id.55	-0.192481	0.302469	-0.636366	0.524678	1054	0.891869	0.743192
CESD	genus.Allisonella.id.2174	0.175338	0.279567	0.627177	0.530681	1054	0.891617	0.743374
CESD	genus.Acetanaerobacterium.id.2051	0.410402	0.659272	0.622508	0.533744	1054	0.891676	0.74471
CESD	family.Neisseriaceae.id.3010	-0.399054	0.653601	-0.610547	0.541633	1054	0.892091	0.74979
CESD	order.Neisseriales.id.3009	-0.399054	0.653601	-0.610547	0.541633	1054	0.892091	0.74979
CESD	genus.Prevotella7.id.11182	0.0791445	0.130982	0.604239	0.545816	1054	0.892253	0.75263
CESD	genus.Solobacterium.id.2161	-0.132367	0.221131	-0.598589	0.549577	1054	0.892028	0.754867
CESD	genus.Synergistes.id.3913	-0.269142	0.458294	-0.58727	0.55715	1054	0.891875	0.762302
CESD	genus..Eubacteriumnodatumgroup.id.11297	-0.164447	0.283467	-0.580128	0.561954	1054	0.892164	0.762333
CESD	order.NB1n.id.3953	-0.147038	0.255978	-0.574416	0.565811	1054	0.891835	0.762333
CESD	family.Veillonellaceae.id.2172	0.0501229	0.0878938	0.570266	0.56862	1054	0.891762	0.763205
CESD	genus.Anaerostipes.id.1991	-0.0853578	0.152233	-0.560703	0.57512	1054	0.891732	0.769006
CESD	family.Thermoanaerobacteraceae.id.2126	-0.249721	0.450872	-0.553862	0.579792	1054	0.891835	0.769423
CESD	order.Thermoanaerobacterales.id.2112	-0.249721	0.450872	-0.553862	0.579792	1054	0.891835	0.769423
CESD	family.Campylobacteraceae.id.3273	-0.353092	0.660994	-0.534184	0.593329	1054	0.891987	0.778606
CESD	family.Pseudomonadaceae.id.3718	0.287453	0.536386	0.535908	0.592137	1054	0.892147	0.778606
CESD	genus.Terrisporobacter.id.11348	0.0619467	0.115061	0.53838	0.59043	1054	0.891582	0.778606
CESD	genus.Enterobacter.id.3502	0.165201	0.314931	0.524561	0.6	1054	0.891434	0.784444
CESD	genus.Barnesiella.id.944	-0.0665007	0.129533	-0.513388	0.607789	1054	0.891754	0.791696
CESD	genus.Actinomyces.id.423	0.126515	0.258068	0.490239	0.624068	1054	0.891732	0.804532
CESD	genus.Olsenella.id.822	-0.0832188	0.169954	-0.489655	0.624481	1054	0.891687	0.804532
CESD	genus.Campylobacter.id.3275	-0.340235	0.715728	-0.47537	0.634623	1054	0.891915	0.811674
CESD	genus.Neisseria.id.3032	-0.312915	0.658215	-0.475398	0.634603	1054	0.892027	0.811674
CESD	family.Porphyromonadaceae.id.943	-0.0605314	0.131566	-0.460085	0.645551	1054	0.891741	0.82267
CESD	family.Carnobacteriaceae.id.1811	0.205669	0.459727	0.447372	0.6547	1054	0.891818	0.831327
CESD	genus.Lactococcus.id.1851	-0.0896197	0.209736	-0.427297	0.669252	1054	0.891892	0.846759
CESD	family.Actinomycetaceae.id.421	0.105455	0.256828	0.410606	0.681446	1054	0.891738	0.856051
CESD	order.Actinomycetales.id.420	0.105455	0.256828	0.410606	0.681446	1054	0.891738	0.856051
CESD	genus.Lactonifactor.id.11332	0.15742	0.408634	0.385234	0.700143	1054	0.891733	0.87642
CESD	genus.LachnospiraceaeNK4B4group.id.11320	-0.133349	0.359934	-0.37048	0.7111	1054	0.891916	0.886991
CESD	genus.Asaccharobacter.id.813	-0.417813	1.22233	-0.341817	0.732558	1054	0.891811	0.907635
CESD	genus.Coprobacter.id.949	-0.0797433	0.233506	-0.341504	0.732793	1054	0.892114	0.907635
CESD	class.Synergistia.id.3899	-0.102859	0.324653	-0.316829	0.751437	1054	0.891762	0.91468
CESD	family.Synergistaceae.id.3901	-0.102859	0.324653	-0.316829	0.751437	1054	0.891762	0.91468
CESD	genus.Citrobacter.id.3497	0.138906	0.43368	0.320297	0.748808	1054	0.891911	0.91468
CESD	order.Synergistales.id.3900	-0.102859	0.324653	-0.316829	0.751437	1054	0.891762	0.91468
CESD	phylum.Synergistetes.id.3898	-0.102859	0.324653	-0.316829	0.751437	1054	0.891762	0.91468
CESD	genus.EscherichiaShigella.id.3504	-0.0237393	0.0759877	-0.31241	0.754791	1054	0.89167	0.915606
CESD	family.Bacteroidaceae.id.917	0.0384269	0.129909	0.295798	0.767444	1054	0.891785	0.919026
CESD	genus.Bacteroides.id.918	0.0384269	0.129909	0.295798	0.767444	1054	0.891785	0.919026
CESD	genus.Catenibacterium.id.2153	-0.0320749	0.108715	-0.295036	0.768025	1054	0.891807	0.919026
CESD	genus.Cloacibacillus.id.3908	0.132917	0.438214	0.303316	0.76171	1054	0.891875	0.919026
CESD	class.Negativicutes.id.2164	-0.0340238	0.127919	-0.265979	0.790308	1054	0.891915	0.93461
CESD	genus..Eubacteriumhalliigroup.id.11338	0.0437793	0.164334	0.266405	0.78998	1054	0.891994	0.93461
CESD	genus.PrevotellaceaeNK3B31group.id.11185	-0.0348514	0.131887	-0.264252	0.791638	1054	0.891904	0.93461
CESD	order.Selenomonadales.id.2165	-0.0340238	0.127919	-0.265979	0.790308	1054	0.891915	0.93461
CESD	genus.Atopobium.id.814	-0.151846	0.588068	-0.258211	0.796295	1054	0.892115	0.936974
CESD	genus.Slackia.id.825	0.0409727	0.162666	0.251883	0.801181	1054	0.89199	0.939591
CESD	class.Betaproteobacteria.id.2867	0.0293833	0.130351	0.225417	0.821699	1054	0.891666	0.960463
CESD	class.Bacteroidia.id.912	-0.0267923	0.144499	-0.185415	0.85294	1054	0.891781	0.961218
CESD	class.Chloroplast.id.1501	-0.124462	0.709492	-0.175425	0.86078	1054	0.891898	0.961218
CESD	family.Bacillaceae.id.1680	-0.0899086	0.485528	-0.185177	0.853126	1054	0.891719	0.961218
CESD	family.Corynebacteriaceae.id.448	0.124613	0.657106	0.189639	0.849629	1054	0.891846	0.961218
CESD	family.Enterococcaceae.id.1828	0.0369179	0.199732	0.184837	0.853393	1054	0.891871	0.961218
CESD	genus.Caproiciproducens.id.14382	0.0632847	0.363802	0.173954	0.861936	1054	0.891894	0.961218
CESD	genus.Enterococcus.id.1831	0.0357155	0.200911	0.177768	0.85894	1054	0.891867	0.961218
CESD	genus.ErysipelotrichaceaeUCG004.id.11385	-0.156207	0.735337	-0.212429	0.831814	1054	0.891759	0.961218
CESD	genus.LachnospiraceaeUCG008.id.11328	0.0381491	0.221338	0.172357	0.86319	1054	0.891795	0.961218
CESD	NOTAX_genus	0.0652098	0.367127	0.177622	0.859055	1054	0.891775	0.961218
CESD	order.Bacteroidales.id.913	-0.0267923	0.144499	-0.185415	0.85294	1054	0.891781	0.961218
CESD	phylum.Bacteroidetes.id.905	-0.0271815	0.144482	-0.188131	0.850811	1054	0.891781	0.961218
CESD	family.FamilyXI.id.1936	0.0624997	0.373203	0.167468	0.867034	1054	0.89183	0.962462
CESD	family.Enterobacteriaceae.id.3469	0.0122608	0.0778571	0.157478	0.874899	1054	0.891885	0.965123
CESD	order.Enterobacteriales.id.3468	0.0122608	0.0778571	0.157478	0.874899	1054	0.891885	0.965123
CESD	family.Rikenellaceae.id.967	0.0191641	0.127646	0.150134	0.880688	1054	0.891829	0.966537
CESD	genus.Ruminiclostridium.id.11353	-0.161397	1.08389	-0.148905	0.881657	1054	0.891767	0.966537
CESD	genus.Holdemania.id.2157	0.0379265	0.296001	0.12813	0.898071	1054	0.891749	0.976589
CESD	order.Corynebacteriales.id.447	0.0839387	0.655479	0.128057	0.898129	1054	0.891827	0.976589
CESD	phylum.Firmicutes.id.1672	-0.107717	0.849521	-0.126797	0.899125	1054	0.891804	0.976589
CESD	class.Erysipelotrichia.id.2147	0.0159438	0.172049	0.0926704	0.926183	1054	0.891773	0.977915
CESD	class.Lentisphaeria.id.2250	-0.0222667	0.284177	-0.0783549	0.937561	1054	0.89178	0.977915
CESD	family.Erysipelotrichaceae.id.2149	0.0159438	0.172049	0.0926704	0.926183	1054	0.891773	0.977915
CESD	family.Oxalobacteraceae.id.2966	0.0187748	0.284987	0.0658794	0.947487	1054	0.891794	0.977915
CESD	family.Succinivibrionaceae.id.3326	-0.0137009	0.219369	-0.0624559	0.950212	1054	0.891762	0.977915
CESD	genus.Bacillus.id.1688	-0.0437697	0.494701	-0.088477	0.929515	1054	0.891745	0.977915
CESD	genus.Finegoldia.id.1940	0.110152	0.942995	0.116811	0.907032	1054	0.89181	0.977915
CESD	genus.Mogibacterium.id.1960	-0.0313093	0.320569	-0.0976679	0.922215	1054	0.891788	0.977915
CESD	genus.Oxalobacter.id.2978	0.0299658	0.285589	0.104926	0.916454	1054	0.891803	0.977915
CESD	genus.Romboutsia.id.11347	-0.0116012	0.105191	-0.110288	0.912203	1054	0.891817	0.977915
CESD	genus.Ruminiclostridium9.id.11357	0.0132202	0.18544	0.0712913	0.94318	1054	0.891815	0.977915
CESD	genus.RuminococcaceaeUCG004.id.11362	0.00810876	0.127543	0.0635769	0.949319	1054	0.891804	0.977915
CESD	order.Aeromonadales.id.3316	-0.0187714	0.219341	-0.0855812	0.931816	1054	0.891753	0.977915
CESD	order.Burkholderiales.id.2874	0.00934647	0.13005	0.0718684	0.94272	1054	0.891738	0.977915
CESD	order.Erysipelotrichales.id.2148	0.0159438	0.172049	0.0926704	0.926183	1054	0.891773	0.977915
CESD	order.Victivallales.id.2254	-0.0222667	0.284177	-0.0783549	0.937561	1054	0.89178	0.977915
CESD	phylum.Lentisphaerae.id.2238	-0.0260003	0.283692	-0.0916497	0.926994	1054	0.891779	0.977915
CESD	phylum.Proteobacteria.id.2375	0.012585	0.103998	0.121013	0.903704	1054	0.891857	0.977915
CESD	genus.Anaerofilum.id.2053	0.0174608	0.308114	0.0566698	0.954819	1054	0.891806	0.9798
CESD	family.Alcaligenaceae.id.2875	-0.00638223	0.128688	-0.0495947	0.960455	1054	0.891823	0.982726
CESD	class.Gammaproteobacteria.id.3303	0.00123669	0.0815607	0.0151629	0.987905	1054	0.891798	0.999267
CESD	genus.Acidaminococcus.id.2167	0.00110485	0.178419	0.00619243	0.99506	1054	0.891789	0.999267
CESD	genus.Catenisphaera.id.14395	0.004747	0.310791	0.0152739	0.987817	1054	0.891779	0.999267
CESD	genus.Faecalicoccus.id.11391	0.00533076	0.570001	0.00935219	0.99254	1054	0.891791	0.999267
CESD	genus.HafniaObesumbacterium.id.14636	0.00141627	0.394637	0.0035888	0.997137	1054	0.891788	0.999267
CESD	genus.Parvibacter.id.824	0.00532241	1.13839	0.00467539	0.99627	1054	0.891786	0.999267
CESD	genus.Peptostreptococcus.id.2045	0.00132232	1.01068	0.00130835	0.998956	1054	0.891787	0.999267
CESD	order.Pseudomonadales.id.3709	0.000374688	0.407544	0.00091938	0.999267	1054	0.891787	0.999267

## Sheet: Supplementary Table 4
Complete results of Random Forest analysis
Marker	%IncMSE	IncNodePurity	imp.sd
genus.RuminococcaceaeUCG005.id.11363	0.909305	278.027	0.198113
genus.Roseburia.id.2012	0.90537	834.571	0.132655
genus.ChristensenellaceaeR7group.id.11283	0.882118	486.077	0.139038
genus.Streptococcus.id.1853	0.642272	1144.37	0.107059
genus.Lachnoclostridium.id.11308	0.463119	578.497	0.112249
genus.RuminococcaceaeUCG014.id.11371	0.401992	502.337	0.0988988
genus.Ruminococcus1.id.11373	0.378263	485.859	0.0828835
genus.Bacteroides.id.918	0.367752	658.682	0.0765341
genus.RuminococcaceaeUCG010.id.11367	0.365967	187.235	0.104681
genus.Terrisporobacter.id.11348	0.336854	555.98	0.0556931
genus..Eubacteriumfissicatenagroup.id.14373	0.308775	286.028	0.0466754
genus.Anaerotruncus.id.2054	0.269339	252.608	0.0787554
genus..Eubacteriumventriosumgroup.id.11341	0.264202	341.078	0.080546
genus.RuminococcaceaeV9D2013group.id.11372	0.23513	205.316	0.0870518
genus..Eubacteriumoxidoreducensgroup.id.11339	0.227418	147.875	0.088146
genus.Dorea.id.1997	0.221798	602.853	0.085355
genus.Blautia.id.1992	0.207941	462.84	0.0524512
genus.Veillonella.id.2198	0.204414	357.912	0.0343683
genus.Eggerthella.id.819	0.194879	232.236	0.061604
genus.RuminococcaceaeNK4A214group.id.11358	0.193305	263.098	0.0601194
genus..Eubacteriumcoprostanoligenesgroup.id.11375	0.175277	522.789	0.0503558
genus.Sellimonas.id.14369	0.163267	137.157	0.0502598
genus.Alloprevotella.id.961	0.160243	197.177	0.0461339
genus.Desulfovibrio.id.3173	0.159831	119.243	0.0451921
genus..Eubacteriumbrachygroup.id.11296	0.15598	167.889	0.0351226
genus..Ruminococcustorquesgroup.id.14377	0.150371	467.946	0.0451902
genus.Rothia.id.646	0.146015	182.378	0.056761
genus.LachnospiraceaeFCS020group.id.11314	0.142812	304.985	0.0479008
genus.Marvinbryantia.id.2005	0.13465	287.741	0.0531394
genus.Coprococcus1.id.11301	0.132666	272.621	0.0444321
genus.Butyricicoccus.id.2055	0.129622	392.676	0.0409414
genus.Turicibacter.id.2162	0.128799	186.467	0.0316882
genus.Intestinibacter.id.11345	0.126376	233.335	0.0404186
genus.Adlercreutzia.id.812	0.122549	236.094	0.0466631
genus.RuminococcaceaeUCG002.id.11360	0.121624	176.896	0.0364943
genus.Ruminiclostridium9.id.11357	0.121131	293.992	0.0413041
genus.Senegalimassilia.id.11160	0.119347	142.863	0.0589144
genus.Slackia.id.825	0.119244	285.252	0.0401941
genus.Rikenella.id.973	0.110595	187.881	0.0267691
genus.Hungatella.id.11306	0.110384	225.284	0.0463158
genus.Anaerostipes.id.1991	0.109844	430.871	0.0559061
genus.Bifidobacterium.id.436	0.108612	389.362	0.0449288
genus.Romboutsia.id.11347	0.105307	206.834	0.0350898
genus.PrevotellaceaeUCG003.id.11187	0.10253	151.999	0.0126201
genus.RuminococcaceaeUCG003.id.11361	0.0984435	170.389	0.0510928
genus.Faecalibacterium.id.2057	0.0977323	362.274	0.0400297
genus.unknowngenus.id.2755	0.0953669	163.52	0.0278899
genus.Parvimonas.id.1945	0.0933	97.1798	0.0205243
genus.RuminococcaceaeUCG007.id.11364	0.0911703	84.7269	0.0283267
genus..Eubacteriumtenuegroup.id.14380	0.0886385	131.79	0.0529329
genus.Eisenbergiella.id.11304	0.0873586	286.689	0.0295207
genus.Odoribacter.id.952	0.0837718	203.175	0.0260358
genus.Collinsella.id.815	0.0797754	220.074	0.0407692
genus.Coprococcus3.id.11303	0.0797487	383.528	0.0692082
genus.Cloacibacillus.id.3908	0.0793235	496.508	0.027613
genus..Eubacteriumeligensgroup.id.14372	0.0758611	290.313	0.0339881
genus.Actinomyces.id.423	0.0756825	191.975	0.0244808
genus.Holdemanella.id.11393	0.0732346	197.46	0.022744
genus.unknowngenus.id.2071	0.0695352	231.55	0.0316177
genus.Erysipelatoclostridium.id.11381	0.0692625	180.66	0.0234904
genus.Anaerofustis.id.1931	0.0692536	233.526	0.0539559
genus.Klebsiella.id.3507	0.0690741	162.725	0.0233149
genus..Ruminococcusgauvreauiigroup.id.11342	0.0688743	251.826	0.0403301
genus.Oxalobacter.id.2978	0.0670665	101.463	0.034227
genus.Hydrogenoanaerobacterium.id.2060	0.0660763	48.6637	0.0387868
genus.Gemella.id.1733	0.0657439	223.136	0.0266061
genus.LachnospiraceaeUCG004.id.11324	0.0655452	163.459	0.0281102
genus.RuminococcaceaeUCG009.id.11366	0.0645142	87.6197	0.0431014
genus.Subdoligranulum.id.2070	0.0607435	293.439	0.037928
genus.Staphylococcus.id.1780	0.0572752	215.298	0.0396431
genus.Ruminococcus2.id.11374	0.0559228	212.011	0.0323083
genus.unknowngenus.id.1000027565	0.054261	18.4895	0.0354495
genus.Parabacteroides.id.954	0.0542161	284.711	0.0419903
genus.Clostridiumsensustricto1.id.1873	0.0540506	180.367	0.0333656
genus.Butyricimonas.id.945	0.0527753	99.2275	0.0230405
genus.Oscillibacter.id.2063	0.0519192	93.4496	0.0187838
genus.Sutterella.id.2896	0.0503384	97.9253	0.0222286
genus.PrevotellaceaeNK3B31group.id.11185	0.0495867	73.6514	0.023064
genus.Fusicatenibacter.id.11305	0.0485879	395.767	0.0494508
genus.unknowngenus.id.1000005479	0.0483404	110.995	0.0209881
genus..Eubacteriumxylanophilumgroup.id.14375	0.0475912	210.858	0.0337897
genus.Alistipes.id.968	0.0449339	248.837	0.0385067
genus.unknowngenus.id.1000013899	0.0422678	87.7333	0.0206717
genus.Scardovia.id.440	0.0419122	107.409	0.0160912
genus.Enterorhabdus.id.820	0.041892	127.313	0.0284966
genus.Tyzzerella.id.11334	0.0418242	91.0246	0.0304746
genus.Caproiciproducens.id.14382	0.0384915	73.9141	0.0195188
genus.LachnospiraceaeUCG010.id.11330	0.0384602	150.01	0.034742
genus.Barnesiella.id.944	0.0380563	212.071	0.0264335
genus.unknowngenus.id.959	0.0367873	64.8558	0.0181048
genus..Eubacteriumrectalegroup.id.14374	0.034747	434.179	0.0669897
genus.LachnospiraceaeUCG008.id.11328	0.0342182	267.03	0.0474277
genus.Listeria.id.1739	0.0342065	77.9592	0.017946
genus.Peptoclostridium.id.11346	0.0337815	134.635	0.00867856
genus.Lactobacillus.id.1837	0.0329495	202.198	0.0378393
genus.Alloscardovia.id.435	0.0326946	59.7767	0.0125233
genus.FamilyXIIIUCG001.id.11294	0.0311316	166.502	0.0288668
genus.Bilophila.id.3170	0.0310079	83.4014	0.0191784
genus.Paraprevotella.id.962	0.0291664	147.193	0.0253973
genus.unknowngenus.id.1000000073	0.027914	104.895	0.0193916
genus.Enterobacter.id.3502	0.0278667	106.346	0.0132787
genus.Mogibacterium.id.1960	0.0260573	49.8119	0.015162
genus.unknowngenus.id.1000006162	0.0258934	39.5561	0.0156117
genus.Akkermansia.id.4037	0.0253199	142.349	0.0312364
genus.Weissella.id.1843	0.0245525	161.983	0.00957831
genus.Coprobacter.id.949	0.0239692	103.63	0.0141592
genus.RuminococcaceaeUCG008.id.11365	0.0207666	165.285	0.014231
genus.Porphyromonas.id.956	0.0197465	38.0097	0.0103887
genus.Fusobacterium.id.2210	0.0190976	517.571	0.0304705
genus.LachnospiraceaeNC2004group.id.11316	0.0184107	169.568	0.0334956
genus.Asaccharobacter.id.813	0.0183596	55.8014	0.0096645
genus.DefluviitaleaceaeUCG011.id.11287	0.017586	97.4406	0.0250407
genus.Lelliottia.id.14638	0.0168565	22.3706	0.0049944
genus.Anaerosporobacter.id.1990	0.0160371	71.9391	0.0154454
genus.Allisonella.id.2174	0.0159068	60.0963	0.0196526
genus.Catenibacterium.id.2153	0.0158438	76.2054	0.0142419
genus.Prevotella9.id.11183	0.0157395	142.327	0.0235277
genus.Faecalicoccus.id.11391	0.0147778	50.1897	0.0104393
genus..Clostridiuminnocuumgroup.id.14397	0.0147597	59.0549	0.0171491
genus.CoriobacteriaceaeUCG003.id.11159	0.0144289	95.8917	0.0123142
genus.Eubacterium.id.1932	0.0143528	77.2383	0.00978846
genus.Citrobacter.id.3497	0.0137286	53.5479	0.00867757
genus.Acinetobacter.id.3711	0.012967	8.36388	0.00842608
genus.Parasutterella.id.2892	0.0118062	183.151	0.0247369
genus.Peptococcus.id.2037	0.011632	144.481	0.0285718
genus.RuminococcaceaeUCG011.id.11368	0.0115448	50.3684	0.0159646
genus.unknowngenus.id.1854	0.00965435	23.7735	0.00439575
genus.Synergistes.id.3913	0.00940391	16.9896	0.00788437
genus.Gordonibacter.id.821	0.00933372	128.721	0.0182149
genus.unknowngenus.id.1000001215	0.00917228	70.4328	0.0127329
genus.unknowngenus.id.2041	0.00909523	75.8624	0.0158952
genus.Megasphaera.id.2185	0.00905354	25.7475	0.0071095
genus.Oscillospira.id.2064	0.0084655	122.982	0.0209952
genus.Cryptobacterium.id.817	0.00807861	31.7146	0.00383098
genus.Abiotrophia.id.1803	0.00793506	43.1343	0.00328471
genus.Haemophilus.id.3698	0.00769222	74.0411	0.0124744
genus.unknowngenus.id.1000000272	0.0073399	17.9349	0.00590724
genus.unknowngenus.id.2163	0.00664493	37.3049	0.00989791
genus.Ruminiclostridium6.id.11356	0.00557393	127.32	0.0253477
genus.Olsenella.id.822	0.00553151	85.7063	0.0137715
genus.Brachyspira.id.3872	0.00537377	15.5886	0.00243828
genus.Deinococcus.id.1615	0.00536129	4.93775	0.00532128
genus..Eubacteriumruminantiumgroup.id.11340	0.00507151	67.0989	0.0174023
genus.Paracoccus.id.2607	0.00506402	36.2396	0.00178128
genus.Christensenella.id.1867	0.00489978	26.5503	0.00474238
genus.Granulicatella.id.1821	0.00488233	44.4148	0.00898164
genus.unknowngenus.id.1000003999	0.00470547	109.654	0.0165199
genus.Intestinimonas.id.2062	0.00464846	318.73	0.0329371
genus.unknowngenus.id.2001	0.00460339	88.1308	0.0207099
genus.CandidatusSoleaferrea.id.11350	0.00441508	86.484	0.0144354
genus.Methanosphaera.id.124	0.00383098	58.4989	0.0100852
genus..Ruminococcusgnavusgroup.id.14376	0.00371785	104.313	0.0256342
genus.Tyzzerella4.id.11336	0.00330708	73.8139	0.0119575
genus.Anaeroglobus.id.2176	0.00325745	32.2512	0.00380557
genus.Acetanaerobacterium.id.2051	0.00300233	22.401	0.0092173
genus.Peptostreptococcus.id.2045	0.00280373	12.294	0.00155367
genus.CandidatusStoquefichus.id.11379	0.0027178	9.53246	0.00246156
genus.Syntrophomonas.id.2076	0.002622	15.6035	0.0103194
genus.Campylobacter.id.3275	0.00242397	14.8354	0.00351791
genus.FamilyXIIIUCG002.id.11295	0.00231379	3.24276	0.00195969
genus.Anaerobiospirillum.id.3327	0.00210469	35.0946	0.00346431
genus.Pseudoflavonifractor.id.2066	0.00203552	69.9563	0.0222417
genus.Murimonas.id.14368	0.0017706	11.0268	0.000976803
genus.unknowngenus.id.1961	0.00158054	6.3492	0.00138033
genus.Neisseria.id.3032	0.00127765	12.636	0.00508391
genus.Gallicola.id.1941	0.00115172	6.24478	0.000885454
genus.Brochothrix.id.1738	0.000987323	10.1191	0.0015032
genus.Howardella.id.2000	0.000659199	200.475	0.0166375
genus.Prevotella.id.963	0.000575246	37.826	0.00718933
genus.unknowngenus.id.1000000005	0.000540429	49.9789	0.00491559
genus.Flavonifractor.id.2059	0.000337582	137.247	0.0230329
genus.Parasporobacterium.id.2009	0.000280865	0.604641	0.000355285
genus.LachnospiraceaeUCG006.id.11326	0.000263524	3.29963	0.000146837
genus.Paraclostridium.id.14379	0.000230208	5.96662	0.000113118
genus.Shuttleworthia.id.2013	0.000134082	13.7918	0.00212268
genus.LachnospiraceaeFE2018group.id.11315	6.07569e-05	0.79791	4.35246e-05
genus.Selenomonas.id.2194	4.50305e-05	1.22933	5.05721e-05
genus.Arcobacter.id.3274	3.74359e-05	0.651788	2.82602e-05
genus.Butyrivibrio2.id.11300	9.22519e-06	1.35309	1.00486e-05
genus.LachnospiraceaeUCG002.id.11322	7.48611e-06	0.175751	1.10599e-05
genus.Johnsonella.id.2002	6.51399e-06	0.331608	6.50748e-06
genus.Anoxybacillus.id.1686	5.6858e-06	0.684129	7.18246e-06
genus.Propionibacterium.id.727	4.06462e-06	0.193981	5.49605e-06
genus.Prevotella1.id.11179	4.54545e-07	0.0312235	4.54091e-07
genus.Bulleidia.id.2152	1.98296e-14	8.63288	1.26875e-14
genus.Sneathia.id.2218	1.50278e-14	0.0626706	6.68455e-15
genus.Samsonia.id.14644	1.39439e-14	0	7.4368e-15
genus.CandidatusArthromitus.id.1872	1.1983e-14	0.297187	5.26781e-15
genus.Sporobacter.id.2069	1.08937e-14	0	1.12712e-14
genus.Anaerovibrio.id.2180	1.01574e-14	0	7.51567e-15
genus.Asaccharospora.id.11344	9.60353e-15	0.797101	1.08797e-14
genus.Geobacillus.id.1696	9.33509e-15	0.0755639	7.2536e-15
genus.LachnospiraceaeUCG007.id.11327	8.34973e-15	0	6.42481e-15
genus.Fructobacillus.id.1840	7.24554e-15	0.00266667	5.67528e-15
genus.Psychrobacillus.id.11273	6.77848e-15	0.0311551	4.54807e-15
genus.Sphaerochaeta.id.11575	6.05687e-15	0.180553	4.43409e-15
genus.Oceanivirga.id.14405	5.52105e-15	0	5.51553e-15
genus.Kluyvera.id.3508	5.39304e-15	0	3.62049e-15
genus.unknowngenus.id.1000000017	3.70553e-15	0	3.70182e-15
genus.Paenibacillus.id.1747	3.53097e-15	0.00975238	3.02814e-15
genus.Lautropia.id.2905	3.29168e-15	0.00524675	5.14087e-15
genus.Paraeggerthella.id.823	3.27042e-15	0.229539	3.42482e-15
genus.unknowngenus.id.1000073353	3.01224e-15	0	8.10722e-15
genus.Metascardovia.id.438	2.18221e-15	0	4.9993e-15
genus.Delftia.id.2927	1.96335e-15	0.011695	1.96139e-15
genus.Rummeliibacillus.id.1766	1.78135e-15	0.00384974	5.48769e-15
genus.Aeromonas.id.3318	1.69456e-15	0	1.62319e-15
genus.Treponema2.id.11577	1.41121e-15	0	1.40979e-15
genus.Clostridiumsensustricto6.id.1888	1.16133e-15	0.00458667	8.28135e-16
genus.Z20.id.14450	1.11214e-15	0	2.09761e-15
genus.Pseudoramibacter.id.1934	7.66875e-16	0.0230476	7.66107e-16
genus.Cetobacterium.id.2209	4.16335e-16	0	4.15919e-16
genus.Acetitomaculum.id.1989	0	0	0
genus.Desulfitibacter.id.2028	0	0	0
genus.Eggerthia.id.2155	0	0	0
genus.Macrococcus.id.1777	0	0	0
genus.Methanomassiliicoccus.id.252	0	0	0
genus.Moryella.id.2006	0	0	0
genus.Propionispira.id.2190	0	0	0
genus.Providencia.id.3519	0	0	0
genus.Tetragenococcus.id.1834	0	0	0
genus.Zimmermannella.id.14215	0	0	0
genus.Negativicoccus.id.2187	-1.73568e-18	0	1.05965e-16
genus.Lachnoclostridium5.id.11312	-9.70277e-17	6.73597	6.55071e-15
genus.Actinotignum.id.11137	-6.34175e-16	2.50005	2.80037e-15
genus.Oceanobacillus.id.1707	-8.39534e-16	0.00171429	8.38694e-16
genus.unknowngenus.id.1951	-1.06259e-15	0.369808	1.75665e-15
genus.Lachnotalea.id.14367	-1.10755e-15	0.0038861	3.33324e-15
genus.Sphingobium.id.2850	-1.63709e-15	0	1.63545e-15
genus.Salmonella.id.3522	-4.0214e-15	0.387346	2.49385e-15
genus.Mycoplasma.id.3950	-5.36958e-15	0	5.27658e-15
genus.Paraherbaspirillum.id.14572	-5.43478e-08	0.00316484	5.42935e-08
genus.LachnospiraceaeUCG009.id.11329	-1.93029e-06	0.0201233	1.92836e-06
genus.unknowngenus.id.1000026453	-2.30207e-06	0.0563681	2.1095e-06
genus.ErysipelotrichaceaeUCG010.id.11390	-3.52332e-06	0.00556656	3.51979e-06
genus.Lysinibacillus.id.1762	-3.97985e-06	0.0584442	3.97587e-06
genus.LachnospiraceaeNK3A20group.id.11318	-7.79524e-06	0.164346	6.14974e-06
genus..Anaerorhabdusfurcosagroup.id.11394	-8.34013e-06	0.071387	8.67832e-06
genus.unknowngenus.id.1000031339	-1.15128e-05	0.00386714	1.12347e-05
genus.Lawsonella.id.14206	-1.81831e-05	0.0357111	9.81659e-06
genus.Methylobacterium.id.2497	-2.2642e-05	0.0238255	2.26194e-05
genus.Aggregatibacter.id.3691	-2.50984e-05	1.24149	0.00024656
genus.Syntrophococcus.id.2016	-2.63187e-05	0.115113	2.62924e-05
genus.unknowngenus.id.441	-3.64507e-05	0.0307708	2.64172e-05
genus.Allobaculum.id.2150	-4.03229e-05	0.205092	1.88706e-05
genus.Corynebacterium1.id.11143	-5.86471e-05	113.397	0.00633922
genus.Mobiluncus.id.425	-6.46835e-05	1.34198	0.000122692
genus.Stomatobaculum.id.2015	-7.26584e-05	0.321205	3.27474e-05
genus.Sarcina.id.1896	-0.000120595	16.1824	0.000108077
genus.Enhydrobacter.id.3713	-0.000122817	1.23311	0.000541998
genus.Clostridiumsensustricto13.id.1877	-0.000127993	1.68381	0.000186416
genus..Eubacteriumnodatumgroup.id.11297	-0.00017321	61.1405	0.0083953
genus.Isobaculum.id.1822	-0.000182552	1.03869	0.000177895
genus.Leptotrichia.id.2216	-0.000193381	0.386891	0.000192554
genus.Gardnerella.id.437	-0.00026233	3.10178	0.000187863
genus.Kocuria.id.642	-0.000301202	8.43682	0.00132306
genus.Fastidiosipila.id.2058	-0.000311768	3.59099	0.000473205
genus.Morganella.id.3512	-0.000327136	0.208479	0.000326809
genus.Robinsoniella.id.2011	-0.000446766	0.889944	0.000573593
genus.Denitrobacterium.id.818	-0.000454212	0.716973	0.000396097
genus.Rhodobacter.id.2624	-0.000473096	1.01346	0.000410994
genus.possiblegenusSk018.id.2019	-0.000534569	0.9788	0.000336788
genus.Parascardovia.id.439	-0.000595097	22.619	0.00638842
genus.Psychrobacter.id.3716	-0.000660527	1.52556	0.000694467
genus.CandidatusSaccharimonas.id.11573	-0.00067701	5.65401	0.00131182
genus.Varibaculum.id.427	-0.000837684	2.77307	0.000684706
genus.Murdochiella.id.1944	-0.00088088	2.9024	0.000850736
genus.unknowngenus.id.428	-0.00102018	12.6375	0.00330715
genus.Paeniclostridium.id.14378	-0.00104075	13.2433	0.00181479
genus.Elusimicrobium.id.1636	-0.00106647	3.23364	0.000529394
genus.Ezakiella.id.11289	-0.00116821	10.9617	0.00250982
genus.Lachnoclostridium12.id.11311	-0.00131867	7.17483	0.001014
genus.Cardiobacterium.id.3411	-0.00132563	2.0214	0.000827697
genus.Anaeroplasma.id.3926	-0.00151059	27.6045	0.00325283
genus.Pyramidobacter.id.3912	-0.00152863	1.03748	0.00153705
genus.Epulopiscium.id.1998	-0.00183545	18.4873	0.0054614
genus.unknowngenus.id.3332	-0.00185795	13.677	0.00316065
genus.Corynebacterium.id.449	-0.0019982	5.84021	0.00174335
genus.Cellulosilyticum.id.1995	-0.00205405	2.41183	0.00103074
genus.PrevotellaceaeUCG001.id.11186	-0.00229576	12.3462	0.0021124
genus..Eubacteriumsaphenumgroup.id.14363	-0.00252587	18.3678	0.00124364
genus.unknowngenus.id.2200	-0.00261261	37.1552	0.00697806
genus.PrevotellaceaeUCG004.id.11188	-0.00275843	2.15942	0.00130303
genus.Helicobacter.id.3279	-0.00276245	4.94099	0.00222858
genus.Ruminiclostridium.id.11353	-0.00278047	10.062	0.0020024
genus.Anaerofilum.id.2053	-0.00286387	221.538	0.0591208
genus.Succinatimonas.id.3329	-0.00301666	15.2432	0.00436
genus.LachnospiraceaeAC2044group.id.11313	-0.00316975	5.9097	0.00184039
genus.Lactonifactor.id.11332	-0.00332433	60.2609	0.00933908
genus.Prevotella2.id.11180	-0.00358141	32.1063	0.00526006
genus.Megamonas.id.2184	-0.003631	5.03943	0.00129174
genus.CoriobacteriaceaeUCG002.id.11158	-0.00406455	76.2999	0.0202532
genus.Carnobacterium.id.1818	-0.00424415	10.358	0.00273024
genus.unknowngenus.id.1000036183	-0.00453699	32.2682	0.0119193
genus.Catabacter.id.11282	-0.00455789	32.9634	0.00731049
genus.Comamonas.id.2925	-0.00468912	14.4307	0.00254189
genus.ErysipelotrichaceaeUCG004.id.11385	-0.00573595	12.9563	0.00318431
genus.Peptoniphilus.id.1946	-0.00596586	8.49487	0.00472781
genus.LachnospiraceaeUCG003.id.11323	-0.00619139	26.3767	0.005136
genus.Butyrivibrio.id.1993	-0.00626101	67.1653	0.0129754
genus.RuminococcaceaeUCG004.id.11362	-0.00657739	119.334	0.0181753
genus.LachnospiraceaeNK4B4group.id.11320	-0.00767844	28.7551	0.00694756
genus.Parvibacter.id.824	-0.00772694	29.7708	0.0104289
genus.Faecalitalea.id.11392	-0.00804891	40.7412	0.0115251
genus.Dielma.id.11380	-0.00804928	23.9812	0.0048862
genus.Lachnospira.id.2004	-0.00876373	191.536	0.0381669
genus.Atopobium.id.814	-0.00953527	31.0751	0.0058313
genus.RikenellaceaeRC9gutgroup.id.11191	-0.00961144	20.5327	0.00627276
genus.Succiniclasticum.id.2169	-0.00987143	26.3197	0.00362487
genus.Lachnoanaerobaculum.id.2003	-0.0104937	14.3217	0.00469301
genus.Prevotella7.id.11182	-0.0105545	119.515	0.0275178
genus.Catenisphaera.id.14395	-0.0107007	16.159	0.0045758
genus.Proteus.id.3518	-0.0108746	32.7617	0.00643139
genus.Solobacterium.id.2161	-0.0111682	46.083	0.0076582
genus.Gelria.id.2134	-0.0114284	51.7299	0.006039
genus.unknowngenus.id.964	-0.0114351	232.258	0.0166533
genus.ErysipelotrichaceaeUCG006.id.11386	-0.0117772	16.0214	0.00838052
genus.Holdemania.id.2157	-0.0119136	82.2584	0.0168575
genus.Succinivibrio.id.3331	-0.0124436	22.6206	0.00686226
genus.Coprobacillus.id.2154	-0.0124474	83.6473	0.0218517
genus.Bacillus.id.1688	-0.0125	39.0618	0.00731977
genus.PrevotellaceaeGa6A1group.id.11184	-0.0129589	75.6032	0.006807
genus.Pseudomonas.id.3723	-0.0132143	60.7868	0.00995489
genus.Selenomonas3.id.11396	-0.0133748	26.6601	0.00628942
genus.Pediococcus.id.1838	-0.0135296	402.161	0.0464893
genus..Bacteroidespectinophilusgroup.id.14371	-0.0150222	14.0242	0.00554791
genus.Stenotrophomonas.id.3818	-0.0150768	37.1343	0.00390542
genus.unknowngenus.id.1000043796	-0.0151727	37.5857	0.00662681
genus.Finegoldia.id.1940	-0.0157108	21.8799	0.0116344
genus.Victivallis.id.2256	-0.0160086	38.4204	0.00738577
genus.unknowngenus.id.1868	-0.0161984	126.39	0.031929
genus.Papillibacter.id.2065	-0.017043	22.1939	0.0131635
genus.unknowngenus.id.1000005472	-0.0180384	86.248	0.028166
genus.Methanobrevibacter.id.123	-0.0182068	76.6216	0.0156953
genus.Mitsuokella.id.2186	-0.0198683	59.8854	0.0155137
genus.Acidaminococcus.id.2167	-0.0202734	66.9785	0.0107927
genus.Anaerococcus.id.1937	-0.0226198	99.6933	0.021128
genus.LachnospiraceaeNK4A136group.id.11319	-0.0228649	202.775	0.0409957
genus.RuminococcaceaeUCG013.id.11370	-0.0230662	322.064	0.042155
genus.Prevotella6.id.11181	-0.0244736	27.4959	0.0130968
genus.Dialister.id.2183	-0.035579	191.732	0.0269066
genus.Ruminiclostridium1.id.11354	-0.0399604	148.126	0.0243594
genus.Leuconostoc.id.1841	-0.0399812	75.8835	0.0246774
genus.Pseudobutyrivibrio.id.2010	-0.0399992	91.3438	0.020063
genus.LachnospiraceaeUCG001.id.11321	-0.0400936	124.484	0.0230353
genus.Oribacterium.id.2008	-0.0416156	348.9	0.0165855
genus.Coprococcus2.id.11302	-0.0458445	271.549	0.0470577
genus..Eubacteriumhalliigroup.id.11338	-0.0512424	259.914	0.0458296
genus.LachnospiraceaeND3007group.id.11317	-0.0534796	372.739	0.0639399
genus.Tyzzerella3.id.11335	-0.0569589	115.802	0.0288747
genus.ErysipelotrichaceaeUCG003.id.11384	-0.0603518	189.803	0.0371052
genus.Phascolarctobacterium.id.2168	-0.0629878	193.215	0.0301331
genus.Lactococcus.id.1851	-0.0646492	188.838	0.0235714
genus.Ruminiclostridium5.id.11355	-0.0677704	613.799	0.067885
genus.Enterococcus.id.1831	-0.0724604	113.933	0.0209352
genus.unknowngenus.id.826	-0.0813184	309.84	0.0483051

## Sheet: Supplementary Table 5
Results of Mendelian Randomization analysis with Major Depression as exposure
Microbial Taxa	Method	Estimate	Std Error	95% CI		P-value
family.Ruminococcaceae.id.2050	Simple median	-0.0755635	0.084659	-0.241492	0.0903652	0.372091
	Weighted median	-0.0690737	0.0824181	-0.23061	0.0924628	0.401981
	Penalized weighted median	-0.074087	0.0825785	-0.235938	0.0877638	0.369628
	IVW	-0.0513773	0.0573285	-0.163739	0.0609845	0.370151
	Penalized IVW	-0.0611665	0.0574685	-0.173803	0.0514697	0.287171
	Robust IVW	-0.0626141	0.0665184	-0.192988	0.0677596	0.346549
	Penalized robust IVW	-0.0621726	0.0657026	-0.190947	0.0666022	0.34401
	MR-Egger	0.445652	0.273597	-0.0905877	0.981891	0.103342
	(intercept)	-0.0112152	0.00603654	-0.0230466	0.000616154	0.0631842
	Penalized MR-Egger	0.523134	0.274877	-0.0156154	1.06188	0.0570203
	(intercept)	-0.013257	0.0060768	-0.0251673	-0.00134669	0.0291409
	Robust MR-Egger	0.524632	0.293323	-0.0502711	1.09953	0.0736826
	(intercept)	-0.0131655	0.00633214	-0.0255762	-0.000754691	0.0376037
	Penalized robust MR-Egger	0.523379	0.294611	-0.0540484	1.10081	0.0756494
	(intercept)	-0.0131325	0.0063457	-0.0255698	-0.000695169	0.0384979
genus..Ruminococcusgauvreauiigroup.id.11342	Method	Estimate	Std Error	95% CI		P-value
	Simple median	-0.0513555	0.101171	-0.249647	0.146936	0.611726
	Weighted median	-0.0639282	0.0988903	-0.25775	0.129893	0.517984
	Penalized weighted median	-0.0859042	0.0987251	-0.279402	0.107593	0.384226
	IVW	0.0254235	0.0695909	-0.110972	0.161819	0.714867
	Penalized IVW	0.0120325	0.0682223	-0.121681	0.145746	0.860002
	Robust IVW	-0.0264185	0.0863334	-0.195629	0.142792	0.7596
	Penalized robust IVW	-0.0263076	0.0831086	-0.189198	0.136582	0.751589
	MR-Egger	-0.177046	0.333402	-0.830502	0.476409	0.595398
	(intercept)	0.00456876	0.00735633	-0.00984938	0.0189869	0.534557
	Penalized MR-Egger	-0.219656	0.331523	-0.869429	0.430116	0.507607
	(intercept)	0.00544406	0.00730871	-0.00888075	0.0197689	0.456348
	Robust MR-Egger	-0.440473	0.389699	-1.20427	0.323324	0.258354
	(intercept)	0.00914382	0.00829903	-0.00712199	0.0254096	0.270551
	Penalized robust MR-Egger	-0.424516	0.380458	-1.1702	0.321168	0.264507
	(intercept)	0.00882556	0.00812891	-0.00710682	0.0247579	0.277612
genus.Eggerthella.id.819	Method	Estimate	Std Error	95% CI		P-value
	Simple median	0.401466	0.164581	0.0788939	0.724038	0.0147146
	Weighted median	0.322211	0.162016	0.00466528	0.639757	0.0467278
	Penalized weighted median	0.330429	0.162346	0.0122357	0.648622	0.0418175
	IVW	0.256787	0.115249	0.0309043	0.482671	0.0258727
	Penalized IVW	0.255997	0.115181	0.0302475	0.481747	0.0262446
	Robust IVW	0.251979	0.124139	0.0086705	0.495287	0.042376
	Penalized robust IVW	0.251832	0.124049	0.00870026	0.494964	0.0423464
	MR-Egger	0.293075	0.553333	-0.791437	1.37759	0.596352
	(intercept)	-0.00081886	0.0122093	-0.0247487	0.023111	0.946527
	Penalized MR-Egger	0.239542	0.544935	-0.828512	1.3076	0.660243
	(intercept)	2.07002e-06	0.0120137	-0.0235443	0.0235484	0.999863
	Robust MR-Egger	0.317697	0.62528	-0.907829	1.54322	0.611392
	(intercept)	-0.00147737	0.01375	-0.0284269	0.0254722	0.914436
	Penalized robust MR-Egger	0.296511	0.623284	-0.925103	1.51813	0.634271
	(intercept)	-0.00114883	0.0137507	-0.0280997	0.0258021	0.933417
genus.Hungatella.id.11306	Method	Estimate	Std Error	95% CI		P-value
	Simple median	0.303015	0.176676	-0.043264	0.649294	0.0863294
	Weighted median	0.10438	0.17415	-0.236948	0.445708	0.548927
	Penalized weighted median	0.104229	0.17444	-0.237668	0.446125	0.550172
	IVW	0.0672816	0.119112	-0.166173	0.300736	0.572168
	Penalized IVW	0.0735492	0.119104	-0.15989	0.306989	0.536892
	Robust IVW	0.102071	0.151651	-0.195159	0.399301	0.500905
	Penalized robust IVW	0.101751	0.150218	-0.19267	0.396172	0.498179
	MR-Egger	-1.77513	0.571487	-2.89523	-0.655038	0.00189532
	(intercept)	0.0415154	0.0125952	0.0168293	0.0662015	0.000980239
	Penalized MR-Egger	-1.77513	0.571487	-2.89523	-0.655038	0.00189532
	(intercept)	0.0415154	0.0125952	0.0168293	0.0662015	0.000980239
	Robust MR-Egger	-1.76124	0.980971	-3.68391	0.161426	0.072589
	(intercept)	0.0411269	0.0196962	0.00252308	0.0797307	0.0367921
	Penalized robust MR-Egger	-1.76124	0.980971	-3.68391	0.161426	0.072589
	(intercept)	0.0411269	0.0196962	0.00252308	0.0797307	0.0367921
genus.Lachnoclostridium.id.11308	Method	Estimate	Std Error	95% CI		P-value
	Simple median	0.12417	0.086462	-0.0452921	0.293633	0.150967
	Weighted median	0.0550601	0.085736	-0.112979	0.2231	0.52074
	Penalized weighted median	0.0548479	0.0858504	-0.113416	0.223112	0.522902
	IVW	0.0448936	0.0624966	-0.0775975	0.167385	0.472549
	Penalized IVW	0.0427856	0.0622884	-0.0792975	0.164869	0.492149
	Robust IVW	0.0369627	0.0612538	-0.0830926	0.157018	0.546219
	Penalized robust IVW	0.036692	0.0610821	-0.0830268	0.156411	0.548041
	MR-Egger	-0.418954	0.295588	-0.998295	0.160388	0.156378
	(intercept)	0.0104664	0.00652171	-0.00231595	0.0232487	0.108527
	Penalized MR-Egger	-0.428664	0.289978	-0.99701	0.139681	0.139336
	(intercept)	0.0104737	0.00639684	-0.00206392	0.0230112	0.101564
	Robust MR-Egger	-0.36504	0.245757	-0.846714	0.116635	0.137446
	(intercept)	0.00914237	0.00559976	-0.00183295	0.0201177	0.102545
	Penalized robust MR-Egger	-0.367843	0.246954	-0.851864	0.116178	0.136351
	(intercept)	0.00913638	0.00561242	-0.00186376	0.0201365	0.103549
genus.LachnospiraceaeUCG001.id.11321	Method	Estimate	Std Error	95% CI		P-value
	Simple median	0.0824204	0.112872	-0.138804	0.303645	0.465259
	Weighted median	0.0886666	0.112847	-0.13251	0.309843	0.43203
	Penalized weighted median	0.0956464	0.112899	-0.125632	0.316925	0.396893
	IVW	0.0539105	0.0765205	-0.0960669	0.203888	0.481107
	Penalized IVW	0.0539105	0.0765205	-0.0960669	0.203888	0.481107
	Robust IVW	0.0632153	0.0806377	-0.0948316	0.221262	0.433074
	Penalized robust IVW	0.0632153	0.0806377	-0.0948316	0.221262	0.433074
	MR-Egger	-0.300989	0.364352	-1.0151	0.413127	0.40875
	(intercept)	0.00801439	0.00804434	-0.00775222	0.023781	0.319116
	Penalized MR-Egger	-0.300989	0.364352	-1.0151	0.413127	0.40875
	(intercept)	0.00801439	0.00804434	-0.00775222	0.023781	0.319116
	Robust MR-Egger	-0.107289	0.489157	-1.06602	0.851442	0.82639
	(intercept)	0.00382023	0.0104818	-0.0167238	0.0243642	0.715513
	Penalized robust MR-Egger	-0.107289	0.489157	-1.06602	0.851442	0.82639
	(intercept)	0.00382023	0.0104818	-0.0167238	0.0243642	0.715513
genus.RuminococcaceaeUCG002.id.11360	Method	Estimate	Std Error	95% CI		P-value
	Simple median	-0.0680951	0.0857689	-0.236199	0.100009	0.427232
	Weighted median	-0.0670557	0.084747	-0.233157	0.0990454	0.428801
	Penalized weighted median	-0.0631474	0.0847145	-0.229185	0.10289	0.456022
	IVW	-0.0789498	0.0593092	-0.195194	0.0372942	0.183138
	Penalized IVW	-0.0789498	0.0593092	-0.195194	0.0372942	0.183138
	Robust IVW	-0.0792072	0.0554818	-0.18795	0.0295351	0.1534
	Penalized robust IVW	-0.0792072	0.0554818	-0.18795	0.0295351	0.1534
	MR-Egger	-0.0968407	0.282981	-0.651474	0.457792	0.732188
	(intercept)	0.000403739	0.0062441	-0.0118345	0.012642	0.948445
	Penalized MR-Egger	-0.0968407	0.282981	-0.651474	0.457792	0.732188
	(intercept)	0.000403739	0.0062441	-0.0118345	0.012642	0.948445
	Robust MR-Egger	-0.158596	0.28747	-0.722027	0.404835	0.581157
	(intercept)	0.00181386	0.0066986	-0.0113151	0.0149429	0.786558
	Penalized robust MR-Egger	-0.158596	0.28747	-0.722027	0.404835	0.581157
	(intercept)	0.00181386	0.0066986	-0.0113151	0.0149429	0.786558
genus.RuminococcaceaeUCG003.id.11361	Method	Estimate	Std Error	95% CI		P-value
	Simple median	-0.0170279	0.0981887	-0.209474	0.175418	0.862321
	Weighted median	-0.0399463	0.096273	-0.228638	0.148745	0.678195
	Penalized weighted median	-0.0440799	0.0960877	-0.232408	0.144249	0.646416
	IVW	0.0406884	0.0654243	-0.087541	0.168918	0.533998
	Penalized IVW	0.0299646	0.0648155	-0.0970715	0.157001	0.643862
	Robust IVW	0.0298415	0.0702315	-0.10781	0.167493	0.670909
	Penalized robust IVW	0.0267577	0.0687604	-0.10801	0.161526	0.697169
	MR-Egger	-0.0719082	0.313991	-0.687319	0.543503	0.818858
	(intercept)	0.00254031	0.00692691	-0.0110362	0.0161168	0.71382
	Penalized MR-Egger	-0.0489595	0.308858	-0.65431	0.556391	0.874049
	(intercept)	0.00184707	0.00681835	-0.0115167	0.0152108	0.78647
	Robust MR-Egger	-0.0996158	0.276702	-0.641942	0.44271	0.718839
	(intercept)	0.00293479	0.0061052	-0.00903118	0.0149008	0.630727
	Penalized robust MR-Egger	-0.0947464	0.276145	-0.635981	0.446489	0.731521
	(intercept)	0.00278507	0.00606214	-0.0090965	0.0146666	0.645932
genus.RuminococcaceaeUCG005.id.11363	Method	Estimate	Std Error	95% CI		P-value
	Simple median	-0.0649207	0.0882076	-0.237804	0.107963	0.461732
	Weighted median	-0.0711002	0.0871667	-0.241944	0.0997434	0.414683
	Penalized weighted median	-0.06848	0.0872832	-0.239552	0.102592	0.432705
	IVW	-0.0347087	0.0610409	-0.154347	0.0849294	0.569619
	Penalized IVW	-0.0347087	0.0610409	-0.154347	0.0849294	0.569619
	Robust IVW	-0.033217	0.0587927	-0.148449	0.0820145	0.572083
	Penalized robust IVW	-0.033217	0.0587927	-0.148449	0.0820145	0.572083
	MR-Egger	-0.0316765	0.291078	-0.602178	0.538825	0.913341
	(intercept)	-6.84404e-05	0.00642389	-0.012659	0.0125221	0.991499
	Penalized MR-Egger	-0.0316765	0.291078	-0.602178	0.538825	0.913341
	(intercept)	-6.84404e-05	0.00642389	-0.012659	0.0125221	0.991499
	Robust MR-Egger	-0.0357198	0.287889	-0.599973	0.528533	0.901256
	(intercept)	5.64964e-05	0.00630627	-0.0123036	0.0124166	0.992852
	Penalized robust MR-Egger	-0.0357198	0.287889	-0.599973	0.528533	0.901256
	(intercept)	5.64964e-05	0.00630627	-0.0123036	0.0124166	0.992852
genus.Sellimonas.id.14369	Method	Estimate	Std Error	95% CI		P-value
	Simple median	0.431992	0.20869	0.0229684	0.841017	0.0384501
	Weighted median	0.258828	0.205327	-0.143604	0.661261	0.207464
	Penalized weighted median	0.256735	0.205669	-0.146369	0.659839	0.211924
	IVW	0.244425	0.154803	-0.0589828	0.547832	0.114349
	Penalized IVW	0.235582	0.144177	-0.0469997	0.518164	0.102264
	Robust IVW	0.236637	0.160917	-0.0787541	0.552028	0.141412
	Penalized robust IVW	0.238469	0.155376	-0.0660618	0.543	0.124835
	MR-Egger	0.0335071	0.740167	-1.41719	1.48421	0.963892
	(intercept)	0.00476515	0.0163483	-0.027277	0.0368073	0.770687
	Penalized MR-Egger	-0.440861	0.681652	-1.77687	0.895151	0.517791
	(intercept)	0.0149049	0.0150588	-0.0146098	0.0444196	0.322281
	Robust MR-Egger	-0.352989	1.06129	-2.43308	1.72711	0.739434
	(intercept)	0.0130775	0.0221519	-0.0303394	0.0564944	0.554953
	Penalized robust MR-Egger	-0.54533	0.984876	-2.47565	1.38499	0.579782
	(intercept)	0.0171439	0.0204545	-0.0229462	0.0572341	0.401947
genus.Subdoligranulum.id.2070	Method	Estimate	Std Error	95% CI		P-value
	Simple median	0.0512785	0.087971	-0.121141	0.223698	0.559959
	Weighted median	0.0789207	0.0867766	-0.0911584	0.249	0.363102
	Penalized weighted median	0.100181	0.0866951	-0.0697382	0.2701	0.247863
	IVW	-0.0108782	0.058499	-0.125534	0.103778	0.852479
	Penalized IVW	-0.00449026	0.0586094	-0.119363	0.110382	0.938931
	Robust IVW	-0.0028791	0.0633112	-0.126967	0.121209	0.963728
	Penalized robust IVW	-0.000639963	0.0623651	-0.122873	0.121593	0.991813
	MR-Egger	0.325173	0.279144	-0.22194	0.872286	0.244063
	(intercept)	-0.0075832	0.00615919	-0.019655	0.00448859	0.218248
	Penalized MR-Egger	0.323265	0.279158	-0.223875	0.870404	0.246864
	(intercept)	-0.00751767	0.00615992	-0.0195909	0.00455555	0.222307
	Robust MR-Egger	0.394466	0.313024	-0.219049	1.00798	0.207605
	(intercept)	-0.0088842	0.006799	-0.02221	0.0044416	0.191318
	Penalized robust MR-Egger	0.394213	0.313128	-0.219507	1.00793	0.208048
	(intercept)	-0.00887554	0.00680096	-0.0222052	0.0044541	0.191879
genus.Eubacteriumventriosumgroup.id.11341	Method	Estimate	Std Error	95% CI		P-value
	Simple median	0.0567355	0.0918774	-0.123341	0.236812	0.536896
	Weighted median	0.0911299	0.0910911	-0.0874054	0.269665	0.317104
	Penalized weighted median	0.0827607	0.0912971	-0.0961783	0.2617	0.364672
	IVW	0.0881879	0.0626718	-0.0346466	0.211022	0.159387
	Penalized IVW	0.0881879	0.0626718	-0.0346466	0.211022	0.159387
	Robust IVW	0.0637386	0.0718558	-0.0770962	0.204573	0.37506
	Penalized robust IVW	0.0637386	0.0718558	-0.0770962	0.204573	0.37506
	MR-Egger	0.51615	0.298995	-0.0698704	1.10217	0.084297
	(intercept)	-0.00965783	0.00659755	-0.0225888	0.00327313	0.143235
	Penalized MR-Egger	0.51615	0.298995	-0.0698704	1.10217	0.084297
	(intercept)	-0.00965783	0.00659755	-0.0225888	0.00327313	0.143235
	Robust MR-Egger	0.555949	0.327897	-0.0867173	1.19861	0.0899808
	(intercept)	-0.0112548	0.00747919	-0.0259137	0.00340419	0.132373
	Penalized robust MR-Egger	0.555949	0.327897	-0.0867173	1.19861	0.0899808
	(intercept)	-0.0112548	0.00747919	-0.0259137	0.00340419	0.132373
genus.Coprococcus3.id.11303	Method	Estimate	Std Error	95% CI		P-value
	Simple median	0.0577226	0.0899002	-0.118479	0.233924	0.520825
	Weighted median	0.050451	0.0891816	-0.124342	0.225244	0.57159
	Penalized weighted median	0.0566292	0.0891924	-0.118185	0.231443	0.525487
	IVW	0.0255459	0.0623564	-0.0966704	0.147762	0.682044
	Penalized IVW	0.0278319	0.0620751	-0.0938332	0.149497	0.653895
	Robust IVW	0.0413162	0.062517	-0.081215	0.163847	0.50869
	Penalized robust IVW	0.0418068	0.0622614	-0.0802232	0.163837	0.501919
	MR-Egger	0.244273	0.298259	-0.340303	0.828849	0.412788
	(intercept)	-0.00493604	0.00658132	-0.0178352	0.0079631	0.45325
	Penalized MR-Egger	0.244273	0.298259	-0.340303	0.828849	0.412788
	(intercept)	-0.00493604	0.00658132	-0.0178352	0.0079631	0.45325
	Robust MR-Egger	0.201463	0.383562	-0.550304	0.953231	0.599414
	(intercept)	-0.00361938	0.00854028	-0.020358	0.0131193	0.671711
	Penalized robust MR-Egger	0.201463	0.383562	-0.550304	0.953231	0.599414
	(intercept)	-0.00361938	0.00854028	-0.020358	0.0131193	0.671711

## Sheet: Supplementary Table 6
Results of Mendelian Randomization analysis with microbiome as exposure
Microbial Taxa	Method	Estimate	Std Error	95% CI		P-value
family.Ruminococcaceae.id.2050	Simple median	0.0171909	0.0322197	-0.0459585	0.0803403	0.593651
	Weighted median	0.000678871	0.0307616	-0.0596128	0.0609705	0.982393
	Penalized weighted median	0.000678871	0.0307616	-0.0596128	0.0609705	0.982393
	IVW	0.0052946	0.0239294	-0.0416062	0.0521954	0.824891
	Penalized IVW	0.0052946	0.0239294	-0.0416062	0.0521954	0.824891
	Robust IVW	0.00509616	0.0199066	-0.03392	0.0441123	0.797948
	Penalized robust IVW	0.00509616	0.0199066	-0.03392	0.0441123	0.797948
	MR-Egger	-0.0212675	0.0444081	-0.108306	0.0657708	0.632003
	(intercept)	0.00309255	0.00435548	-0.00544403	0.0116291	0.477681
	Penalized MR-Egger	-0.0212675	0.0444081	-0.108306	0.0657708	0.632003
	(intercept)	0.00309255	0.00435548	-0.00544403	0.0116291	0.477681
	Robust MR-Egger	-0.0215204	0.0284258	-0.077234	0.0341933	0.449008
	(intercept)	0.0030236	0.00206378	-0.00102134	0.00706854	0.1429
	Penalized robust MR-Egger	-0.0215204	0.0284258	-0.077234	0.0341933	0.449008
	(intercept)	0.0030236	0.00206378	-0.00102134	0.00706854	0.1429
genus.Eggerthella.id.819	Method	Estimate	Std Error	95% CI		P-value
	Simple median	0.00516886	0.0209133	-0.0358205	0.0461582	0.804787
	Weighted median	0.00424856	0.0209894	-0.0368899	0.045387	0.839592
	Penalized weighted median	0.00878073	0.0215085	-0.0333751	0.0509365	0.683094
	IVW	0.00261436	0.0177794	-0.0322326	0.0374613	0.883097
	Penalized IVW	0.00261436	0.0177794	-0.0322326	0.0374613	0.883097
	Robust IVW	0.00472235	0.0171763	-0.0289426	0.0383873	0.783367
	Penalized robust IVW	0.00472235	0.0171763	-0.0289426	0.0383873	0.783367
	MR-Egger	0.0309721	0.0765683	-0.119099	0.181043	0.685843
	(intercept)	-0.00313207	0.00820111	-0.0192059	0.0129418	0.702529
	Penalized MR-Egger	0.0309721	0.0765683	-0.119099	0.181043	0.685843
	(intercept)	-0.00313207	0.00820111	-0.0192059	0.0129418	0.702529
	Robust MR-Egger	0.0288299	0.0620082	-0.0927039	0.150364	0.641976
	(intercept)	-0.00281121	0.008639	-0.0197434	0.0141209	0.744871
	Penalized robust MR-Egger	0.0288299	0.0620082	-0.0927039	0.150364	0.641976
	(intercept)	-0.00281121	0.008639	-0.0197434	0.0141209	0.744871
genus.Hungatella.id.11306	Method	Estimate	Std Error	95% CI		P-value
	Simple median	-0.0127259	0.0227972	-0.0574077	0.0319559	0.576693
	Weighted median	-0.0115029	0.0228143	-0.0562181	0.0332123	0.614122
	Penalized weighted median	-0.0115029	0.0228143	-0.0562181	0.0332123	0.614122
	IVW	-0.00440006	0.0180288	-0.0397358	0.0309357	0.807186
	Penalized IVW	-0.00440006	0.0180288	-0.0397358	0.0309357	0.807186
	Robust IVW	-0.00711615	0.0188543	-0.04407	0.0298377	0.705856
	Penalized robust IVW	-0.00711615	0.0188543	-0.04407	0.0298377	0.705856
	MR-Egger	-0.0062815	0.213079	-0.423909	0.411346	0.976482
	(intercept)	0.000239236	0.0269821	-0.0526446	0.0531231	0.992926
	Penalized MR-Egger	-0.0062815	0.213079	-0.423909	0.411346	0.976482
	(intercept)	0.000239236	0.0269821	-0.0526446	0.0531231	0.992926
	Robust MR-Egger	0.0228746	0.204031	-0.377019	0.422769	0.910734
	(intercept)	-0.00388202	0.0280731	-0.0589042	0.0511402	0.890017
	Penalized robust MR-Egger	0.0228746	0.204031	-0.377019	0.422769	0.910734
	(intercept)	-0.00388202	0.0280731	-0.0589042	0.0511402	0.890017
genus.Lachnoclostridium.id.11308	Method	Estimate	Std Error	95% CI		P-value
	Simple median	-0.0420773	0.0326555	-0.106081	0.0219263	0.197565
	Weighted median	-0.0425052	0.0318265	-0.104884	0.0198736	0.181703
	Penalized weighted median	-0.0434943	0.0316701	-0.105566	0.0185778	0.169641
	IVW	-0.0292408	0.0246377	-0.0775299	0.0190483	0.235294
	Penalized IVW	-0.0323337	0.0238672	-0.0791125	0.0144452	0.175503
	Robust IVW	-0.0377388	0.0296874	-0.095925	0.0204475	0.203656
	Penalized robust IVW	-0.0364224	0.028917	-0.0930987	0.0202539	0.207832
	MR-Egger	0.00251344	0.0836852	-0.161506	0.166533	0.97604
	(intercept)	-0.00224437	0.00563548	-0.0132897	0.00880096	0.690441
	Penalized MR-Egger	0.00251344	0.0836852	-0.161506	0.166533	0.97604
	(intercept)	-0.00224437	0.00563548	-0.0132897	0.00880096	0.690441
	Robust MR-Egger	-0.0813805	0.0930477	-0.263751	0.10099	0.381785
	(intercept)	0.00265243	0.00526123	-0.00765939	0.0129642	0.614159
	Penalized robust MR-Egger	-0.0813805	0.0930477	-0.263751	0.10099	0.381785
	(intercept)	0.00265243	0.00526123	-0.00765939	0.0129642	0.614159
genus.LachnospiraceaeUCG001.id.11321	Method	Estimate	Std Error	95% CI		P-value
	Simple median	0.0115675	0.0237587	-0.0349987	0.0581337	0.626347
	Weighted median	0.0145749	0.0242663	-0.0329863	0.062136	0.548093
	Penalized weighted median	0.012781	0.0242506	-0.0347492	0.0603112	0.598167
	IVW	0.0182495	0.0180778	-0.0171822	0.0536813	0.312734
	Penalized IVW	0.0182495	0.0180778	-0.0171822	0.0536813	0.312734
	Robust IVW	0.0127404	0.0219519	-0.0302845	0.0557652	0.56166
	Penalized robust IVW	0.0127404	0.0219519	-0.0302845	0.0557652	0.56166
	MR-Egger	0.0201395	0.0669386	-0.111058	0.151337	0.763517
	(intercept)	-0.000175578	0.00596773	-0.0118721	0.011521	0.976529
	Penalized MR-Egger	0.0201395	0.0669386	-0.111058	0.151337	0.763517
	(intercept)	-0.000175578	0.00596773	-0.0118721	0.011521	0.976529
	Robust MR-Egger	0.036795	0.0725187	-0.105339	0.178929	0.611884
	(intercept)	-0.00245437	0.00965553	-0.0213789	0.0164701	0.799346
	Penalized robust MR-Egger	0.036795	0.0725187	-0.105339	0.178929	0.611884
	(intercept)	-0.00245437	0.00965553	-0.0213789	0.0164701	0.799346
genus.RuminococcaceaeUCG002.id.11360	Method	Estimate	Std Error	95% CI		P-value
	Simple median	0.0284693	0.0330454	-0.0362986	0.0932372	0.388952
	Weighted median	0.0227588	0.0312025	-0.0383971	0.0839147	0.465764
	Penalized weighted median	0.028198	0.0320004	-0.0345216	0.0909175	0.378222
	IVW	0.00127119	0.0263615	-0.0503963	0.0529387	0.96154
	Penalized IVW	0.00127119	0.0263615	-0.0503963	0.0529387	0.96154
	Robust IVW	0.00181998	0.0295685	-0.0561332	0.0597732	0.95092
	Penalized robust IVW	0.00181998	0.0295685	-0.0561332	0.0597732	0.95092
	MR-Egger	-0.0310246	0.0723317	-0.172792	0.110743	0.667981
	(intercept)	0.00250521	0.00520165	-0.00768983	0.0127002	0.630077
	Penalized MR-Egger	-0.0310246	0.0723317	-0.172792	0.110743	0.667981
	(intercept)	0.00250521	0.00520165	-0.00768983	0.0127002	0.630077
	Robust MR-Egger	-0.0329877	0.0794606	-0.188728	0.122752	0.678036
	(intercept)	0.00267348	0.00570963	-0.00851718	0.0138641	0.639612
	Penalized robust MR-Egger	-0.0329877	0.0794606	-0.188728	0.122752	0.678036
	(intercept)	0.00267348	0.00570963	-0.00851718	0.0138641	0.639612
genus.RuminococcaceaeUCG003.id.11361	Method	Estimate	Std Error	95% CI		P-value
	Simple median	-0.0203352	0.0254814	-0.0702779	0.0296075	0.424847
	Weighted median	-0.0143613	0.0256957	-0.0647239	0.0360014	0.576231
	Penalized weighted median	-0.017937	0.0259217	-0.0687427	0.0328687	0.488958
	IVW	-0.0045926	0.0194572	-0.0427281	0.0335429	0.813405
	Penalized IVW	-0.0100732	0.0190746	-0.0474588	0.0273124	0.597433
	Robust IVW	-0.0134948	0.0194877	-0.05169	0.0247004	0.488637
	Penalized robust IVW	-0.0132048	0.0181993	-0.0488748	0.0224652	0.468106
	MR-Egger	-0.0210978	0.0548236	-0.12855	0.0863545	0.700363
	(intercept)	0.00133351	0.00412205	-0.00674557	0.00941259	0.746312
	Penalized MR-Egger	-0.0210978	0.0548236	-0.12855	0.0863545	0.700363
	(intercept)	0.00133351	0.00412205	-0.00674557	0.00941259	0.746312
	Robust MR-Egger	0.00576209	0.0648978	-0.121435	0.132959	0.929251
	(intercept)	-0.00182276	0.00599749	-0.0135776	0.00993209	0.761188
	Penalized robust MR-Egger	0.00576209	0.0648978	-0.121435	0.132959	0.929251
	(intercept)	-0.00182276	0.00599749	-0.0135776	0.00993209	0.761188
genus.RuminococcaceaeUCG005.id.11363	Method	Estimate	Std Error	95% CI		P-value
	Simple median	-6.69672e-05	0.0135945	-0.0267116	0.0265777	0.99607
	Weighted median	0.00270007	0.00883027	-0.014607	0.0200071	0.759777
	Penalized weighted median	0.0026998	0.00883042	-0.0146075	0.0200071	0.759804
	IVW	-0.00352027	0.00681944	-0.0168861	0.00984558	0.605707
	Penalized IVW	-0.00354829	0.00679945	-0.016875	0.00977839	0.601775
	Robust IVW	-0.00247258	0.00604696	-0.0143244	0.00937925	0.682616
	Penalized robust IVW	-0.00246975	0.00605364	-0.0143347	0.00939517	0.68329
	MR-Egger	0.00114651	0.00882888	-0.0161578	0.0184508	0.896678
	(intercept)	-0.00164047	0.0019522	-0.00546671	0.00218578	0.400731
	Penalized MR-Egger	0.002382	0.00807484	-0.0134444	0.0182084	0.768001
	(intercept)	-0.00233337	0.00180979	-0.00588049	0.00121375	0.197292
	Robust MR-Egger	0.00310369	0.00717162	-0.0109524	0.0171598	0.665179
	(intercept)	-0.0022028	0.00214773	-0.00641228	0.00200668	0.305061
	Penalized robust MR-Egger	0.00325111	0.0069107	-0.0102936	0.0167958	0.638037
	(intercept)	-0.00228567	0.00210506	-0.0064115	0.00184017	0.277568
genus.Sellimonas.id.14369	Method	Estimate	Std Error	95% CI		P-value
	Simple median	-0.0349295	0.0160675	-0.0664212	-0.00343782	0.0297107
	Weighted median	-0.0353287	0.01589	-0.0664726	-0.00418486	0.0261937
	Penalized weighted median	-0.0354256	0.0158763	-0.0665427	-0.00430859	0.0256581
	IVW	-0.0320669	0.011509	-0.0546241	-0.00950973	0.00533214
	Penalized IVW	-0.0320669	0.011509	-0.0546241	-0.00950973	0.00533214
	Robust IVW	-0.0315835	0.0124193	-0.0559249	-0.00724215	0.0109873
	Penalized robust IVW	-0.0315835	0.0124193	-0.0559249	-0.00724215	0.0109873
	MR-Egger	-0.0115682	0.0583989	-0.126028	0.102892	0.842976
	(intercept)	-0.00290985	0.00812731	-0.0188391	0.0130194	0.720318
	Penalized MR-Egger	-0.0115682	0.0583989	-0.126028	0.102892	0.842976
	(intercept)	-0.00290985	0.00812731	-0.0188391	0.0130194	0.720318
	Robust MR-Egger	0.00145387	0.0721988	-0.140053	0.142961	0.983934
	(intercept)	-0.00512296	0.0126044	-0.0298272	0.0195813	0.684419
	Penalized robust MR-Egger	0.00145387	0.0721988	-0.140053	0.142961	0.983934
	(intercept)	-0.00512296	0.0126044	-0.0298272	0.0195813	0.684419
genus.Subdoligranulum.id.2070	Method	Estimate	Std Error	95% CI		P-value
	Simple median	-0.0075987	0.0317649	-0.0698568	0.0546594	0.810938
	Weighted median	-0.00226556	0.0316361	-0.0642713	0.0597401	0.94291
	Penalized weighted median	-0.00226556	0.0316361	-0.0642713	0.0597401	0.94291
	IVW	-0.00580278	0.0220421	-0.0490046	0.037399	0.792351
	Penalized IVW	-0.00580278	0.0220421	-0.0490046	0.037399	0.792351
	Robust IVW	-0.00544109	0.0194644	-0.0435906	0.0327084	0.77983
	Penalized robust IVW	-0.00544109	0.0194644	-0.0435906	0.0327084	0.77983
	MR-Egger	-0.00680296	0.0480547	-0.100988	0.0873826	0.887422
	(intercept)	8.41679e-05	0.00354967	-0.00687306	0.0070414	0.981083
	Penalized MR-Egger	-0.00680296	0.0480547	-0.100988	0.0873826	0.887422
	(intercept)	8.41679e-05	0.00354967	-0.00687306	0.0070414	0.981083
	Robust MR-Egger	-0.00564394	0.0256302	-0.0558782	0.0445903	0.82571
	(intercept)	1.15899e-05	0.0024627	-0.0048152	0.00483838	0.996245
	Penalized robust MR-Egger	-0.00564394	0.0256302	-0.0558782	0.0445903	0.82571
	(intercept)	1.15899e-05	0.0024627	-0.0048152	0.00483838	0.996245
genus.Eubacteriumventriosumgroup.id.11341	Method	Estimate	Std Error	95% CI		P-value
	Simple median	0.0253286	0.032658	-0.0386799	0.0893371	0.438003
	Weighted median	0.0267521	0.0327563	-0.0374491	0.0909534	0.4141
	Penalized weighted median	0.0268649	0.0327951	-0.0374124	0.0911421	0.412687
	IVW	0.0304704	0.0248278	-0.0181913	0.0791321	0.219722
	Penalized IVW	0.0304704	0.0248278	-0.0181913	0.0791321	0.219722
	Robust IVW	0.0317915	0.0258333	-0.0188409	0.0824239	0.218458
	Penalized robust IVW	0.0317915	0.0258333	-0.0188409	0.0824239	0.218458
	MR-Egger	0.0452206	0.0970205	-0.144936	0.235377	0.641149
	(intercept)	-0.00115724	0.00733323	-0.0155301	0.0132156	0.874608
	Penalized MR-Egger	0.0452206	0.0970205	-0.144936	0.235377	0.641149
	(intercept)	-0.00115724	0.00733323	-0.0155301	0.0132156	0.874608
	Robust MR-Egger	0.0650021	0.133071	-0.195813	0.325817	0.625214
	(intercept)	-0.00249282	0.00923833	-0.0205996	0.015614	0.787288
	Penalized robust MR-Egger	0.0650021	0.133071	-0.195813	0.325817	0.625214
	(intercept)	-0.00249282	0.00923833	-0.0205996	0.015614	0.787288
genus.Coprococcus3.id.11303	Method	Estimate	Std Error	95% CI		P-value
	Simple median	0.00432037	0.0130246	-0.0212073	0.029848	0.740109
	Weighted median	0.00392713	0.00265389	-0.0012744	0.00912866	0.138936
	Penalized weighted median	0.00392638	0.00265374	-0.00127486	0.00912761	0.13899
	IVW	0.00412934	0.00216194	-0.000107985	0.00836666	0.0561312
	Penalized IVW	0.00412934	0.00216194	-0.000107985	0.00836666	0.0561312
	Robust IVW	0.00403706	0.000467449	0.00312088	0.00495324	5.80308e-18
	Penalized robust IVW	0.00403706	0.000467449	0.00312088	0.00495324	5.80308e-18
	MR-Egger	0.00195822	0.0025672	-0.0030734	0.00698984	0.445593
	(intercept)	0.00177165	0.00112967	-0.000442463	0.00398576	0.116814
	Penalized MR-Egger	0.00195822	0.0025672	-0.0030734	0.00698984	0.445593
	(intercept)	0.00177165	0.00112967	-0.000442463	0.00398576	0.116814
	Robust MR-Egger	0.00162988	0.00186992	-0.0020351	0.00529486	0.383409
	(intercept)	0.00206177	0.00184095	-0.00154643	0.00566997	0.262736
	Penalized robust MR-Egger	0.00162988	0.00186992	-0.00203509	0.00529486	0.383409
	(intercept)	0.00206177	0.00184095	-0.00154643	0.00566997	0.262736

## Sheet: Supplementary Table 7
Association results of MDD SNPs to microbial taxa
SNP	TAXON	alleles	eff.allele	beta	SE	zval	pval	N	rsID
1:197704717	genus.Acidaminococcus.id.2167	C/T	T	0.17388	0.03501	4.9323	8.13e-07	2711	rs17641524
1:80809636	genus..Eubacteriumtenuegroup.id.14380	G/A	A	0.67558	0.17144	3.8576	0.0001146	166	rs113188507
15:47684936	genus.Mannheimia.id.3701	T/C	C	-0.9283	0.24223	-3.8323	0.0001269	33	rs34488670
11:113370758	genus.LachnospiraceaeUCG009.id.11329	A/G	A	-0.58299	0.15608	-3.7351	0.00018757	74	rs61902811
5:103972357	family.Defluviitaleaceae.id.1924	G/A	A	-0.06082	0.01661	-3.6616	0.00025045	8242	rs30266
9:119731045	genus.Biostraticola.id.3471	T/G	G	-0.27843	0.07824	-3.5803	0.00034307	387	rs10817969
5:103972357	genus.DefluviitaleaceaeUCG011.id.11287	G/A	A	-0.05898	0.01663	-3.5464	0.00039053	8222	rs30266
11:65314830	genus..Eubacteriumbrachygroup.id.11296	A/T	T	0.09833	0.02776	3.5128	0.00044341	4048	rs58621819
15:37643831	genus.ErysipelotrichaceaeUCG006.id.11386	C/T	C	-0.31589	0.08948	-3.5079	0.00045149	239	rs8037355
18:35138245	genus.Citrobacter.id.3497	G/A	A	-0.27924	0.07991	-3.4753	0.00051009	345	rs12967855
9:36999369	genus.Papillibacter.id.2065	C/T	T	0.15258	0.04325	3.4739	0.00051314	1123	rs7030813
18:53099012	genus.Leuconostoc.id.1841	G/C	G	0.13467	0.03805	3.4731	0.00051468	1590	rs12967143
9:2983774	family.Micrococcaceae.id.636	A/C	C	-0.11786	0.03309	-3.4703	0.00051968	2008	rs1354115
2:157111313	family.Moraxellaceae.id.3710	C/T	C	-0.24142	0.0703	-3.4424	0.00057658	616	rs1226412
2:208044470	genus.Tyzzerella3.id.11335	A/G	A	-0.06985	0.02076	-3.4395	0.00058257	5478	rs62188629
16:13066833	family.unknownfamily.id.1855	C/T	T	0.28132	0.08241	3.4381	0.00058603	411	rs7200826
16:13066833	genus.unknowngenus.id.1000043796	C/T	T	0.28132	0.08241	3.4381	0.00058603	411	rs7200826
4:123186393	genus..Clostridiuminnocuumgroup.id.14397	A/G	G	0.20132	0.05828	3.4366	0.0005895	2807	rs45510091
4:42110353	genus.unknowngenus.id.2001	T/C	C	0.07766	0.02266	3.43	0.00060358	9624	rs34937911
9:2983774	family.Leuconostocaceae.id.1839	A/C	C	0.10504	0.03149	3.4262	0.00061254	2324	rs1354115
14:64697037	family.Flammeovirgaceae.id.1035	T/C	T	0.57741	0.16869	3.423	0.0006198	61	rs1152578
14:64697037	genus.Fulvitalea.id.13905	T/C	T	0.57741	0.16869	3.423	0.0006198	61	rs1152578
6:27835435	genus.Coprobacillus.id.2154	A/G	G	0.19828	0.05767	3.4206	0.00062483	1391	rs200949
9:36999369	class.Erysipelotrichia.id.2147	C/T	T	0.03691	0.01076	3.4151	0.00063782	18343	rs7030813
9:36999369	order.Erysipelotrichales.id.2148	C/T	T	0.03691	0.01076	3.4151	0.00063782	18343	rs7030813
9:36999369	family.Erysipelotrichaceae.id.2149	C/T	T	0.03691	0.01076	3.4151	0.00063782	18343	rs7030813
1:50559162	genus..Bacteroidespectinophilusgroup.id.14371	A/G	G	-1.3863	0.40676	-3.4081	0.00065393	15	rs11579246
18:52488672	genus.unknowngenus.id.1854	C/T	T	0.38052	0.11101	3.3999	0.00067435	272	rs62091461
7:82454404	genus.possiblegenusSk018.id.2019	C/G	C	-0.52684	0.15698	-3.3561	0.00079021	70	rs2247523
11:88744425	genus.Allisonella.id.2174	C/T	T	0.08342	0.02492	3.3214	0.00089567	3248	rs7932640
17:27363750	genus.Clostridiumsensustricto19.id.1883	G/A	A	-1.08596	0.32698	-3.3212	0.00089631	37	rs75581564
13:99115041	family.Flammeovirgaceae.id.1035	T/C	T	0.56959	0.17265	3.2991	0.0009703	61	rs4772087
13:99115041	genus.Fulvitalea.id.13905	T/C	T	0.56959	0.17265	3.2991	0.0009703	61	rs4772087
1:72765116	family.Enterococcaceae.id.1828	G/A	G	0.13839	0.04127	3.2817	0.0010322	1340	rs2568958
1:72765116	family.Halomonadaceae.id.3610	G/A	G	0.20157	0.06102	3.2811	0.0010344	551	rs2568958
1:72765116	order.Oceanospirillales.id.3593	G/A	G	0.20055	0.06092	3.2698	0.00107624	553	rs2568958
1:50559162	genus.Adlercreutzia.id.812	A/G	G	0.08357	0.02567	3.2605	0.00111255	8051	rs11579246
11:70544937	genus.Hydrogenoanaerobacterium.id.2060	A/G	G	-0.11955	0.03639	-3.2569	0.00112596	1513	rs7117514
7:109099919	genus.unknowngenus.id.1000000073	A/G	G	-0.04518	0.01382	-3.2528	0.00114193	10570	rs58104186
7:109099919	family.ClostridialesvadinBB60group.id.11286	A/G	G	-0.04518	0.01382	-3.2528	0.00114193	10570	rs58104186
14:64697037	genus.unknowngenus.id.1000040046	T/C	T	-0.44802	0.13794	-3.248	0.00116138	97	rs1152578
14:64697037	family.P5D1.392.id.1847	T/C	T	-0.44802	0.13794	-3.248	0.00116138	97	rs1152578
1:175913828	genus.Atopobium.id.814	T/C	T	-0.16476	0.05054	-3.239	0.00119865	826	rs10913112
10:106610839	genus.LachnospiraceaeUCG004.id.11324	A/G	A	0.0402	0.0126	3.2127	0.00131539	14555	rs1021363
15:37643831	genus.Peptostreptococcus.id.2045	C/T	C	0.34403	0.10625	3.2094	0.00133012	179	rs8037355
1:50559162	genus.Sellimonas.id.14369	A/G	G	-0.1308	0.04074	-3.2016	0.00136572	3154	rs11579246
3:61192911	genus.Intestinibacter.id.11345	A/G	A	-0.21741	0.06712	-3.1978	0.0013848	458	rs141954845
16:7666402	genus.Alkalitalea.id.931	C/T	C	0.61379	0.19294	3.1812	0.00146768	50	rs7198928
14:104017953	genus.unknowngenus.id.2071	A/G	A	0.04029	0.01266	3.1724	0.00151185	12490	rs10149470
1:175913828	genus.Intestinimonas.id.2062	T/C	T	-0.04188	0.01332	-3.1695	0.00152649	12114	rs10913112
4:42110353	genus.Peptoniphilus.id.1946	T/C	C	0.26125	0.08328	3.1653	0.00154976	687	rs34937911
18:35138245	genus.Eisenbergiella.id.11304	G/A	A	-0.0638	0.01996	-3.1592	0.00158094	5639	rs12967855
14:60141822	genus.Anaerosporobacter.id.1990	T/G	G	0.4565	0.14489	3.1507	0.00162935	92	rs1956373
18:53099012	family.Leuconostocaceae.id.1839	G/C	G	0.09972	0.03133	3.1502	0.0016327	2314	rs12967143
3:157977962	genus.Alistipes.id.968	C/T	C	-0.03375	0.01076	-3.1462	0.00165407	17704	rs1095626
6:142996618	genus.Romboutsia.id.11347	C/G	G	0.03806	0.01212	3.1455	0.0016586	13851	rs2876520
5:87545318	family.Carnobacteriaceae.id.1811	C/T	C	0.08712	0.0279	3.1351	0.00171854	2594	rs3099439
6:165121844	genus.Ruminiclostridium6.id.11356	A/T	A	0.03842	0.01227	3.1327	0.00173265	13514	rs2029865
11:57650796	genus.Peptostreptococcus.id.2045	C/T	T	0.36446	0.11786	3.131	0.00174331	178	rs2509805
6:142996618	family.Enterococcaceae.id.1828	C/G	G	0.12626	0.04061	3.1255	0.00177563	1247	rs2876520
3:49214066	genus.unknowngenus.id.2049	A/G	G	-0.23332	0.0762	-3.1229	0.00179018	505	rs13084037
1:175913828	genus.Pyramidobacter.id.3912	T/C	T	-1.33183	0.42662	-3.1218	0.00179749	15	rs10913112
6:101387304	genus.Erysipelatoclostridium.id.11381	T/A	A	0.04458	0.01453	3.1163	0.00183198	9908	rs7758630
12:121205078	phylum.Euryarchaeota.id.55	A/G	A	-0.07218	0.02282	-3.1128	0.00185322	3864	rs3213572
18:52488672	family.Acidaminococcaceae.id.2166	C/T	T	-0.0464	0.01491	-3.1108	0.00186581	12655	rs62091461
9:2983774	genus.Lactonifactor.id.11332	A/C	C	-0.09203	0.02888	-3.1107	0.00186581	2591	rs1354115
9:2983774	genus.Turicibacter.id.2162	A/C	C	-0.04647	0.01547	-3.1107	0.00186581	9080	rs1354115
14:60141822	genus.Finegoldia.id.1940	T/G	G	-0.25367	0.08084	-3.1047	0.00190408	356	rs1956373
7:82454404	genus..Eubacteriumnodatumgroup.id.11297	C/G	C	-0.07551	0.02444	-3.0676	0.00215641	3350	rs2247523
7:117502574	family.Streptococcaceae.id.1850	T/C	C	0.03394	0.01106	3.0648	0.00217961	16760	rs7807677
5:164523472	genus.Eggerthella.id.819	C/A	A	-0.06138	0.01988	-3.0619	0.00219863	5203	rs11135349
3:44736493	order.unknownorder.id.11571	T/C	C	-0.51202	0.16766	-3.054	0.00225812	73	rs4346585
3:44736493	family.unknownfamily.id.11572	T/C	C	-0.51202	0.16766	-3.054	0.00225812	73	rs4346585
3:44736493	class.unknownclass.id.11570	T/C	C	-0.51202	0.16766	-3.054	0.00225812	73	rs4346585
3:44736493	phylum.Saccharibacteria.id.11569	T/C	C	-0.51202	0.16766	-3.054	0.00225812	73	rs4346585
14:75130235	genus.Lactonifactor.id.11332	T/G	T	-0.08639	0.02775	-3.0437	0.0023361	2591	rs1045430
20:44680853	genus.Ruminiclostridium1.id.11354	A/G	A	0.11934	0.03935	3.0423	0.00234856	1687	rs12624433
5:103972357	family.Marinilabiaceae.id.929	G/A	A	-0.55724	0.18325	-3.0408	0.00235951	53	rs30266
18:35138245	genus..Bacteroidespectinophilusgroup.id.14371	G/A	A	0.91479	0.30098	3.0394	0.00237207	15	rs12967855
8:65562019	family.Porphyromonadaceae.id.943	T/G	T	-0.0444	0.01498	-3.0359	0.00239739	18161	rs7837935
8:65562019	genus.Papillibacter.id.2065	T/G	T	0.18175	0.06039	3.0274	0.00246831	1124	rs7837935
1:73668836	genus.unknowngenus.id.1868	A/G	A	0.04229	0.01394	3.0268	0.00247157	10389	rs10890020
8:65562019	genus.Barnesiella.id.944	T/G	T	-0.05232	0.01696	-3.0204	0.00252274	14341	rs7837935
5:103972357	genus.Christensenella.id.1867	G/A	A	-0.16694	0.05409	-3.0164	0.00255627	824	rs30266
1:80809636	genus.unknowngenus.id.964	G/A	A	-0.09537	0.03167	-3.0132	0.00258508	2641	rs113188507
16:13066833	genus.Coprobacillus.id.2154	C/T	T	-0.12685	0.04166	-3.0125	0.0025902	1464	rs7200826
15:37643831	genus.Marvinbryantia.id.2005	C/T	C	-0.03909	0.013	-3.0044	0.0026593	12079	rs8037355
10:1795194	genus.Veillonella.id.2198	C/T	T	0.04543	0.01498	3.0019	0.00268388	9417	rs997934
5:87545318	genus.Granulicatella.id.1821	C/T	C	0.08671	0.02924	2.9959	0.00273726	2354	rs3099439
1:197704717	genus.Ruminococcus2.id.11374	C/T	T	0.04263	0.01476	2.9944	0.00275166	15472	rs17641524
9:17016503	genus..Ruminococcustorquesgroup.id.14377	T/A	T	0.03175	0.01059	2.9892	0.00279892	17923	rs263645
1:50559162	genus.RuminococcaceaeUCG009.id.11366	A/G	G	0.08302	0.02699	2.9833	0.00285252	7192	rs11579246
11:113370758	genus.LachnospiraceaeUCG004.id.11324	A/G	A	-0.03665	0.01247	-2.981	0.00287309	14554	rs61902811
4:3207142	genus.CoriobacteriaceaeUCG002.id.11158	A/G	G	0.23126	0.07687	2.9728	0.00295097	334	rs7685686
1:50559162	genus.Biostraticola.id.3471	A/G	G	0.65171	0.21286	2.9723	0.00295674	126	rs11579246
6:165121844	family.Neisseriaceae.id.3010	A/T	A	0.54604	0.18466	2.957	0.00310648	50	rs2029865
9:36999369	genus..Bacteroidespectinophilusgroup.id.14371	C/T	T	-0.85873	0.29075	-2.9535	0.00314091	15	rs7030813
15:47684936	family.Defluviitaleaceae.id.1924	T/C	C	-0.05616	0.01911	-2.9531	0.00314498	8070	rs34488670
2:86819128	genus.Sellimonas.id.14369	T/C	C	0.10175	0.03377	2.9524	0.00315314	3202	rs7585722
16:7666402	family.Marinilabiaceae.id.929	C/T	C	0.56207	0.19044	2.9514	0.00316542	53	rs7198928
3:49214066	genus.Atopobium.id.814	A/G	G	-0.17217	0.05749	-2.9473	0.00320458	826	rs13084037
1:37192741	family.Bacteroidaceae.id.917	T/C	C	0.03346	0.0113	2.9455	0.00322537	18435	rs1002656
1:37192741	genus.Bacteroides.id.918	T/C	C	0.03346	0.0113	2.9455	0.00322537	18435	rs1002656
9:2983774	genus.Weissella.id.1843	A/C	C	0.19026	0.0649	2.9447	0.00323372	684	rs1354115
6:105365891	genus.unknowngenus.id.1000036183	C/G	C	-0.19118	0.06494	-2.9335	0.00335056	475	rs1933802
9:23737627	genus..Eubacteriumcoprostanoligenesgroup.id.11375	A/G	A	-0.0316	0.01074	-2.9316	0.00337004	17513	rs3793577
14:60141822	genus.Oscillospira.id.2064	T/G	G	-0.04783	0.01605	-2.9303	0.00338526	10243	rs1956373
15:47684936	genus.DefluviitaleaceaeUCG011.id.11287	T/C	C	-0.05571	0.01914	-2.9267	0.00342469	8050	rs34488670
14:104017953	genus.unknowngenus.id.3624	A/G	A	0.26863	0.09172	2.9262	0.0034313	229	rs10149470
1:197704717	genus.Catabacter.id.11282	C/T	T	0.18075	0.05926	2.9252	0.00344456	922	rs17641524
9:2983774	genus.Rothia.id.646	A/C	C	-0.1039	0.03412	-2.9223	0.00347345	1895	rs1354115
18:52488672	genus.Blautia.id.1992	C/T	T	0.0363	0.01235	2.9192	0.00351156	18406	rs62091461
1:73668836	genus.Dielma.id.11380	A/G	A	-0.09529	0.03254	-2.9187	0.00351382	1885	rs10890020
18:52488672	genus.Klebsiella.id.3507	C/T	T	0.1527	0.05296	2.9122	0.00359123	893	rs62091461
7:2110346	genus.Adlercreutzia.id.812	T/C	C	0.05692	0.01942	2.911	0.00360505	8243	rs3823624
1:72765116	family.Leptotrichiaceae.id.2215	G/A	G	0.47821	0.16437	2.9093	0.00362355	88	rs2568958
16:13755530	family.Ruminococcaceae.id.2050	A/G	G	0.03335	0.0117	2.906	0.00366316	18468	rs56887639
11:113370758	genus..Eubacteriumeligensgroup.id.14372	A/G	A	-0.03534	0.0123	-2.9039	0.00368428	14886	rs61902811
7:109099919	genus.Paraprevotella.id.962	A/G	G	0.04899	0.01671	2.9003	0.00372925	7285	rs58104186
5:93071630	genus.Finegoldia.id.1940	G/C	C	-0.24981	0.08631	-2.9	0.00373163	356	rs10061069
16:13066833	genus.Anaerofilum.id.2053	C/T	T	-0.06453	0.0226	-2.8973	0.0037627	5091	rs7200826
7:117502574	genus.Streptococcus.id.1853	T/C	C	0.0323	0.01114	2.8976	0.0037627	16520	rs7807677
5:61509655	phylum.Proteobacteria.id.2375	C/T	T	0.03035	0.01047	2.895	0.00379159	18363	rs60157091
2:157111313	genus.Acinetobacter.id.3711	C/T	C	-0.22712	0.07882	-2.8947	0.003794	492	rs1226412
14:75130235	genus.Coprococcus2.id.11302	T/G	T	0.03815	0.01314	2.8946	0.00379642	11619	rs1045430
16:21639710	genus.Rikenella.id.973	C/A	C	-0.38631	0.13368	-2.8909	0.00384018	108	rs12923444
16:7666402	genus.LachnospiraceaeUCG009.id.11329	C/T	C	-0.4764	0.16486	-2.8898	0.00385487	74	rs7198928
11:30892824	order.Bifidobacteriales.id.432	A/G	A	-0.03366	0.01169	-2.8887	0.00386715	15048	rs1448938
11:30892824	family.Bifidobacteriaceae.id.433	A/G	A	-0.03366	0.01169	-2.8887	0.00386715	15048	rs1448938
1:72765116	genus.Lachnoclostridium12.id.11311	G/A	G	-0.49357	0.16932	-2.8799	0.00397675	135	rs2568958
7:12253880	genus.Aeribacillus.id.1681	A/G	A	0.64644	0.22448	2.8797	0.0039818	34	rs2043539
2:22503044	genus.Raoultella.id.3521	T/A	A	-0.3986	0.13846	-2.8788	0.00399191	104	rs12052908
3:44736493	genus.unknowngenus.id.1000003999	T/C	C	-0.49105	0.17087	-2.8738	0.00405566	71	rs4346585
7:82454404	genus.Pyramidobacter.id.3912	C/G	C	0.99672	0.34727	2.8702	0.00410472	15	rs2247523
11:61471678	genus.Raoultella.id.3521	C/T	T	0.78148	0.27248	2.868	0.00413076	104	rs198457
1:197704717	genus.Aurantiacicella.id.14291	C/T	T	0.57917	0.20199	2.8673	0.00414121	72	rs17641524
5:103972357	genus.Faecalitalea.id.11392	G/A	A	0.08218	0.0285	2.8596	0.00424176	2817	rs30266
6:165121844	genus.Varibaculum.id.427	A/T	A	-0.29457	0.10211	-2.8576	0.00426589	181	rs2029865
6:101387304	genus.Sellimonas.id.14369	T/A	A	0.07296	0.02549	2.8551	0.00430368	3200	rs7758630
12:23987925	genus..Bacteroidespectinophilusgroup.id.14371	T/G	G	-1.44189	0.50546	-2.8526	0.00433359	15	rs78337797
17:27363750	phylum.Cyanobacteria.id.1500	G/A	A	-0.07633	0.02703	-2.852	0.00434178	6976	rs75581564
13:53647048	genus.Ralstonia.id.2909	C/A	A	0.28546	0.10028	2.8466	0.00442166	197	rs1343605
16:21639710	genus.Butyricicoccus.id.2055	C/A	C	-0.03119	0.01093	-2.8412	0.00449159	17160	rs12923444
14:75130235	genus.Lachnoclostridium.id.11308	T/G	T	-0.03041	0.01056	-2.8403	0.0045057	18055	rs1045430
1:175913828	genus.ChristensenellaceaeR.7group.id.11283	T/C	T	0.03258	0.01145	2.8399	0.00451418	16458	rs10913112
14:60141822	family.ClostridialesvadinBB60group.id.11286	T/G	G	-0.04508	0.01573	-2.838	0.00453687	10572	rs1956373
14:60141822	genus.unknowngenus.id.1000000073	T/G	G	-0.04508	0.01573	-2.838	0.00453687	10572	rs1956373
11:30892824	phylum.Verrucomicrobia.id.3982	A/G	A	0.03648	0.01281	2.8348	0.00458544	12515	rs1448938
4:123186393	genus.Sutterella.id.2896	A/G	G	-0.09301	0.03249	-2.8314	0.00463447	9082	rs45510091
1:197704717	genus.Alkalitalea.id.931	C/T	T	0.67243	0.23752	2.831	0.00464027	50	rs17641524
4:42110353	genus.Aurantiacicella.id.14291	T/C	C	0.70228	0.24807	2.8309	0.00464317	72	rs34937911
2:58012833	genus.Providencia.id.3519	C/T	T	1.05768	0.37366	2.8306	0.00464608	8	rs1568452
4:42110353	genus.CoriobacteriaceaeUCG002.id.11158	T/C	C	-0.33526	0.11661	-2.829	0.00466645	334	rs34937911
1:175913828	genus.Corynebacterium1.id.11143	T/C	T	-0.75513	0.2671	-2.8272	0.00469277	21	rs10913112
1:67146817	genus.Coprobacillus.id.2154	T/C	C	-0.10632	0.03724	-2.8252	0.00472511	1464	rs10789214
16:7666402	genus.Sutterella.id.2896	C/T	C	-0.03623	0.01271	-2.8248	0.00473101	13357	rs7198928
20:44680853	genus.Coprococcus2.id.11302	A/G	A	0.04321	0.01512	2.819	0.00482035	11539	rs12624433
9:23737627	genus.Lutaonella.id.1162	A/G	A	0.52491	0.18658	2.8133	0.00490511	51	rs3793577
1:197704717	family.Marinilabiaceae.id.929	C/T	T	0.65077	0.23187	2.8066	0.00500985	53	rs17641524
1:8489302	family.Propionibacteriaceae.id.714	T/C	C	0.32804	0.11695	2.805	0.00503166	141	rs301799
5:87545318	genus.LachnospiraceaeNK4B4group.id.11320	C/T	C	-0.09588	0.03393	-2.801	0.00509445	1732	rs3099439
14:64697037	order.Cytophagales.id.990	T/C	T	0.47527	0.16971	2.8005	0.00510393	64	rs1152578
14:64697037	class.Cytophagia.id.989	T/C	T	0.47527	0.16971	2.8005	0.00510393	64	rs1152578
5:61509655	genus.Yokenella.id.3532	C/T	T	0.34491	0.12317	2.8003	0.0051071	124	rs60157091
11:61471678	genus.unknowngenus.id.1961	C/T	T	-0.63425	0.22653	-2.7999	0.00511026	57	rs198457
11:57650796	genus.Eisenbergiella.id.11304	C/T	T	-0.05869	0.02052	-2.7988	0.00512929	5638	rs2509805
16:13755530	genus.Varibaculum.id.427	A/G	G	0.32287	0.11484	2.7984	0.00513565	181	rs56887639
9:17016503	genus.Pseudocitrobacter.id.14642	T/A	T	-0.14363	0.0509	-2.7979	0.00514201	764	rs263645
18:53099012	genus.Tyzzerella4.id.11336	G/C	G	-0.10114	0.03593	-2.796	0.00517074	1725	rs12967143
1:52342427	order.Propionibacteriales.id.704	T/C	C	0.32042	0.11463	2.7954	0.00518355	145	rs1890946
5:93071630	genus.Raoultella.id.3521	G/C	C	-0.45598	0.16325	-2.7932	0.00521572	104	rs10061069
17:27363750	genus.Odoribacter.id.952	G/A	A	-0.05093	0.01894	-2.79	0.00526755	14155	rs75581564
20:39997404	family.Bacillaceae.id.1680	G/T	T	0.87695	0.31503	2.7837	0.00537593	42	rs143186028
16:7666402	genus.LachnospiraceaeUCG006.id.11326	C/T	C	-0.56496	0.20309	-2.7818	0.0054025	43	rs7198928
16:6315880	genus.Providencia.id.3519	A/G	G	1.05864	0.38074	2.7805	0.0054292	8	rs7193263
11:57650796	genus.RuminococcaceaeUCG003.id.11361	C/T	T	0.03722	0.01298	2.7731	0.00555421	14525	rs2509805
5:93071630	genus.Peptostreptococcus.id.2045	G/C	C	0.33036	0.11955	2.7692	0.00562286	180	rs10061069
4:42110353	genus.ErysipelotrichaceaeUCG006.id.11386	T/C	C	-0.39355	0.14305	-2.7687	0.00562632	239	rs34937911
1:197704717	phylum.Firmicutes.id.1672	C/T	T	0.0366	0.01354	2.7677	0.00564707	18473	rs17641524
3:157977962	family.Rikenellaceae.id.967	C/T	C	-0.02955	0.01073	-2.7656	0.00568182	17813	rs1095626
1:72765116	genus.Enterococcus.id.1831	G/A	G	0.12238	0.04365	2.7655	0.0056853	1203	rs2568958
2:157111313	family.Planococcaceae.id.1753	C/T	C	-0.94034	0.34046	-2.762	0.00574485	29	rs1226412
22:41487218	genus.Acidaminococcus.id.2167	C/T	C	0.08508	0.03086	2.7608	0.005766	2580	rs5995992
18:35138245	genus.Mannheimia.id.3701	G/A	A	0.63206	0.22902	2.7599	0.00578368	33	rs12967855
9:31124452	genus.Prevotella6.id.11181	C/G	C	-0.23906	0.0865	-2.7593	0.00579076	299	rs34653192
10:106610839	order.Propionibacteriales.id.704	A/G	A	0.3314	0.12016	2.7581	0.00581562	145	rs1021363
2:157111313	genus.Gordonibacter.id.821	C/T	C	0.08041	0.02824	2.7564	0.00584415	3794	rs1226412
7:82936909	genus.Isobaculum.id.1822	C/T	T	-0.66899	0.24296	-2.7535	0.00589438	28	rs16887442
9:126634255	genus..Eubacteriumfissicatenagroup.id.14373	C/T	C	0.07167	0.02574	2.7526	0.00591602	3873	rs2670139
3:157977962	genus.LachnospiraceaeFCS020group.id.11314	C/T	C	0.03352	0.01214	2.7515	0.00593411	13905	rs1095626
6:27835435	order.Corynebacteriales.id.447	A/G	G	0.1985	0.07172	2.7487	0.00598504	894	rs200949
5:87545318	genus.Burkholderia.Paraburkholderia.id.14563	C/T	C	0.17652	0.06437	2.7411	0.00612525	478	rs3099439
11:65314830	phylum.Verrucomicrobia.id.3982	A/T	T	0.0445	0.01598	2.7392	0.00616264	12515	rs58621819
18:50731802	order.unknownorder.id.11571	G/A	A	0.07686	0.0283	2.7386	0.00617014	2519	rs7227069
18:50731802	family.unknownfamily.id.11572	G/A	A	0.07686	0.0283	2.7386	0.00617014	2519	rs7227069
18:50731802	class.unknownclass.id.11570	G/A	A	0.07686	0.0283	2.7386	0.00617014	2519	rs7227069
18:50731802	phylum.Saccharibacteria.id.11569	G/A	A	0.07686	0.0283	2.7386	0.00617014	2519	rs7227069
18:50731802	genus.unknowngenus.id.1000003999	G/A	A	0.07883	0.02894	2.7366	0.00620777	2410	rs7227069
2:157111313	family.Prevotellaceae.id.960	C/T	C	0.03792	0.01411	2.7362	0.00621532	14998	rs1226412
1:37192741	family.FamilyXI.id.1936	T/C	C	0.0736	0.02711	2.7358	0.00622667	3215	rs1002656
12:23987925	genus.Desulfovibrio.id.3173	T/G	G	0.06182	0.02313	2.7331	0.00627603	9009	rs78337797
7:109099919	genus.Acidaminococcus.id.2167	A/G	G	-0.07604	0.02727	-2.7307	0.00631808	2709	rs58104186
14:60141822	genus.Acetitomaculum.id.1989	T/G	G	0.24877	0.09041	2.7299	0.00633728	320	rs1956373
9:120484009	genus.Coprococcus1.id.11301	A/G	G	0.0317	0.01164	2.7284	0.00636424	16866	rs913930
9:119731045	genus.Butyricicoccus.id.2055	T/G	G	-0.03228	0.01193	-2.7219	0.00648881	17265	rs10817969
6:142996618	genus.Tyzzerella4.id.11336	C/G	G	-0.09761	0.03578	-2.7203	0.0065203	1594	rs2876520
14:60141822	genus.Negativicoccus.id.2187	T/G	G	-1.0511	0.38661	-2.7188	0.00654796	9	rs1956373
1:181740924	genus.Flavonifractor.id.2059	G/A	G	0.04384	0.01616	2.7153	0.00662358	10267	rs169235
14:60141822	phylum.Lentisphaerae.id.2238	T/G	G	-0.06276	0.02302	-2.7145	0.00663559	4850	rs1956373
9:2983774	genus.Ruminiclostridium9.id.11357	A/C	C	0.03185	0.01144	2.7142	0.0066436	16844	rs1354115
18:53099012	order.Pseudomonadales.id.3709	G/C	G	-0.10988	0.04096	-2.713	0.00666369	1383	rs12967143
2:58012833	phylum.Fusobacteria.id.2203	C/T	T	-0.08262	0.03012	-2.7091	0.00674457	2328	rs1568452
2:58012833	class.Fusobacteriia.id.2204	C/T	T	-0.08262	0.03012	-2.7091	0.00674457	2328	rs1568452
13:99115041	order.Cytophagales.id.990	T/C	T	0.46899	0.17333	2.7058	0.00681401	64	rs4772087
13:99115041	class.Cytophagia.id.989	T/C	T	0.46899	0.17333	2.7058	0.00681401	64	rs4772087
12:23987925	class.Actinobacteria.id.419	T/G	G	-0.04739	0.01774	-2.7024	0.00687995	15550	rs78337797
18:53099012	genus.PrevotellaceaeUCG001.id.11186	G/C	G	-0.23164	0.08458	-2.7022	0.00688823	336	rs12967143
13:99115041	genus..Clostridiuminnocuumgroup.id.14397	T/C	T	-0.06071	0.02243	-2.7015	0.00690067	4252	rs4772087
11:30892824	order.Verrucomicrobiales.id.4030	A/G	A	0.03552	0.01308	2.7015	0.00690482	11998	rs1448938
11:30892824	class.Verrucomicrobiae.id.4029	A/G	A	0.03552	0.01308	2.7015	0.00690482	11998	rs1448938
1:8489302	genus.Propionibacterium.id.727	T/C	C	0.32381	0.12005	2.6973	0.00699253	134	rs301799
9:126634255	genus.Alloprevotella.id.961	C/T	C	0.08037	0.02903	2.6972	0.00699673	3069	rs2670139
11:30892824	family.Verrucomicrobiaceae.id.4036	A/G	A	0.03543	0.01308	2.6944	0.00705155	11998	rs1448938
1:181740924	genus.FamilyXIIIAD3011group.id.11293	G/A	G	-0.0378	0.01399	-2.691	0.00711955	13767	rs169235
7:117502574	class.Bacilli.id.1673	T/C	C	0.02917	0.01082	2.6908	0.00713237	17510	rs7807677
3:61192911	genus.Biostraticola.id.3471	A/G	A	-0.74868	0.2786	-2.6873	0.00720107	19	rs141954845
11:61471678	class.Flavobacteriia.id.1089	C/T	T	-0.32214	0.11947	-2.6857	0.00723564	226	rs198457
16:21639710	order.Bacillales.id.1674	C/A	C	-0.06693	0.02465	-2.6848	0.00725732	3350	rs12923444
15:47684936	genus..Ruminococcusgauvreauiigroup.id.11342	T/C	C	0.04039	0.01506	2.6846	0.00726167	12969	rs34488670
6:27835435	genus.Streptococcus.id.1853	A/G	G	0.04736	0.01719	2.6839	0.00727906	16075	rs200949
2:58012833	genus.Lachnospira.id.2004	C/T	T	-0.03017	0.01131	-2.6814	0.0073271	16592	rs1568452
11:30892824	genus.Akkermansia.id.4037	A/G	A	0.03523	0.01308	2.6792	0.00737983	11997	rs1448938
11:30892824	class.Actinobacteria.id.419	A/G	A	-0.02983	0.01118	-2.676	0.00744622	16446	rs1448938
3:157977962	family.Helicobacteraceae.id.3278	C/T	C	-0.25753	0.09584	-2.6761	0.00744622	212	rs1095626
20:39997404	genus.unknowngenus.id.2163	G/T	T	-0.79948	0.29924	-2.6717	0.00754456	48	rs143186028
9:126634255	genus.Shuttleworthia.id.2013	C/T	C	0.68413	0.25606	2.6717	0.00754906	36	rs2670139
14:60141822	genus.Roseburia.id.2012	T/G	G	0.03318	0.01208	2.6671	0.00765317	17986	rs1956373
3:157977962	genus.Helicobacter.id.3279	C/T	C	-0.25661	0.09585	-2.6664	0.00766228	212	rs1095626
20:39997404	genus..Eubacteriumoxidoreducensgroup.id.11339	G/T	T	0.57418	0.19264	2.6654	0.00768968	134	rs143186028
11:57650796	family.Peptococcaceae.id.2024	C/T	T	-0.03888	0.01488	-2.6629	0.00774474	10786	rs2509805
6:66565703	genus.Porphyromonas.id.956	T/C	C	0.30852	0.11587	2.6627	0.00775395	168	rs9363467
3:157977962	genus.Ruminiclostridium9.id.11357	C/T	C	0.02944	0.01104	2.6598	0.00782335	16845	rs1095626
7:82454404	genus.unknowngenus.id.1000005479	C/G	C	0.04118	0.01588	2.6596	0.00782335	8083	rs2247523
7:82454404	family.BacteroidalesS24.7group.id.11173	C/G	C	0.04118	0.01588	2.6596	0.00782335	8083	rs2247523
15:37643831	genus.Aurantiacicella.id.14291	C/T	C	0.43815	0.16478	2.659	0.0078373	72	rs8037355
16:6315880	genus.unknowngenus.id.2001	A/G	G	0.03957	0.01483	2.6588	0.00784195	10216	rs7193263
4:42110353	genus.unknowngenus.id.3624	T/C	C	-0.39873	0.14905	-2.6528	0.00798272	229	rs34937911
1:73668836	genus.RuminococcaceaeUCG011.id.11368	A/G	A	0.06212	0.02336	2.6515	0.00801588	3673	rs10890020
20:44680853	genus.Hungatella.id.11306	A/G	A	0.06607	0.02476	2.6507	0.00803489	4257	rs12624433
16:13066833	genus.Faecalicoccus.id.11391	C/T	T	-0.30727	0.11608	-2.6495	0.00805871	181	rs7200826
3:44736493	genus.Bilophila.id.3170	T/C	C	0.31598	0.1196	2.6498	0.00805871	167	rs4346585
1:72765116	genus.Catenibacterium.id.2153	G/A	G	-0.06073	0.02589	-2.6423	0.00823208	3350	rs2568958
5:164523472	genus.Providencia.id.3519	C/A	A	-0.96922	0.36696	-2.6412	0.00825642	8	rs11135349
11:30892824	genus.Bifidobacterium.id.436	A/G	A	-0.03089	0.01174	-2.6392	0.00831019	14911	rs1448938
6:165121844	family.FamilyXI.id.1732	A/T	A	0.08897	0.03348	2.6393	0.00831019	1781	rs2029865
6:165121844	genus.Gemella.id.1733	A/T	A	0.08897	0.03348	2.6393	0.00831019	1781	rs2029865
11:88744425	genus.unknowngenus.id.1000005479	C/T	T	0.04182	0.01584	2.6384	0.00833474	8084	rs7932640
11:88744425	family.BacteroidalesS24.7group.id.11173	C/T	T	0.04182	0.01584	2.6384	0.00833474	8084	rs7932640
3:61192911	genus.Megasphaera.id.2185	A/G	A	0.23898	0.09074	2.6359	0.00839392	249	rs141954845
2:22503044	family.Moraxellaceae.id.3710	T/A	A	-0.14984	0.05664	-2.635	0.00841373	616	rs12052908
6:142996618	genus.Epulopiscium.id.1998	C/G	G	-0.70875	0.26904	-2.6343	0.00842861	21	rs2876520
2:86819128	genus.Parvibacter.id.824	T/C	C	0.77152	0.29288	2.6342	0.00843855	33	rs7585722
6:105365891	genus.unknowngenus.id.1000040046	C/G	C	-0.36635	0.13911	-2.6335	0.0084485	97	rs1933802
6:105365891	family.P5D1.392.id.1847	C/G	C	-0.36635	0.13911	-2.6335	0.0084485	97	rs1933802
7:82454404	genus.LachnospiraceaeUCG001.id.11321	C/G	C	-0.03677	0.01405	-2.6331	0.00845845	10257	rs2247523
7:117502574	genus.Prevotella6.id.11181	T/C	C	0.18486	0.06945	2.633	0.00846343	408	rs7807677
11:65314830	genus.Shuttleworthia.id.2013	A/T	T	0.69115	0.26269	2.631	0.0085134	36	rs58621819
14:60141822	order.Victivallales.id.2254	T/G	G	-0.06082	0.02303	-2.6301	0.00853346	4845	rs1956373
14:60141822	class.Lentisphaeria.id.2250	T/G	G	-0.06082	0.02303	-2.6301	0.00853346	4845	rs1956373
6:105365891	genus.Lachnotalea.id.14367	C/G	C	0.26689	0.10143	2.6303	0.00853346	193	rs1933802
18:52488672	genus.Subdoligranulum.id.2070	C/T	T	0.03386	0.01259	2.6289	0.00856867	17721	rs62091461
1:72765116	genus.unknowngenus.id.1961	G/A	G	-0.36517	0.13894	-2.6287	0.00856867	111	rs2568958
18:50731802	family.Actinomycetaceae.id.421	G/A	A	0.0426	0.01625	2.6287	0.00857371	7666	rs7227069
9:36999369	genus..Eubacteriumventriosumgroup.id.11341	C/T	T	0.03121	0.01175	2.6277	0.00859896	15415	rs7030813
20:39997404	genus.Bacillus.id.1688	G/T	T	0.85248	0.32444	2.6275	0.00860401	40	rs143186028
1:175913828	genus.Peptostreptococcus.id.2045	T/C	T	-0.28194	0.10531	-2.6219	0.00874154	180	rs10913112
7:2110346	genus.Eisenbergiella.id.11304	T/C	C	0.05926	0.0234	2.6219	0.00874667	5641	rs3823624
12:121205078	genus.Terrisporobacter.id.11348	A/G	A	-0.04532	0.01725	-2.6186	0.00882397	6770	rs3213572
1:80809636	genus.unknowngenus.id.1000013899	G/A	A	-0.09059	0.03378	-2.6171	0.00886544	2279	rs113188507
1:80809636	family.unknownfamily.id.987	G/A	A	-0.09059	0.03378	-2.6171	0.00886544	2279	rs113188507
15:47684936	genus.Pseudocitrobacter.id.14642	T/C	C	-0.164	0.06164	-2.6162	0.00888624	764	rs34488670
7:109099919	family.Marinilabiaceae.id.929	A/G	G	-0.47938	0.18324	-2.6162	0.00888624	53	rs58104186
8:65562019	genus..Eubacteriumxylanophilumgroup.id.14375	T/G	T	-0.04783	0.01762	-2.6153	0.0089123	13417	rs7837935
18:50731802	order.Actinomycetales.id.420	G/A	A	0.04237	0.01625	2.6148	0.00892797	7667	rs7227069
9:126634255	genus.Marvinbryantia.id.2005	C/T	C	0.03821	0.01455	2.615	0.00892797	12077	rs2670139
18:52488672	order.Clostridiales.id.1863	C/T	T	0.03239	0.01233	2.6145	0.00893843	18470	rs62091461
16:21639710	genus.Raoultella.id.3521	C/A	C	-0.36569	0.13998	-2.6124	0.00898564	104	rs12923444
9:23737627	genus.Faecalibacterium.id.2057	A/G	A	0.0277	0.01053	2.6125	0.0089909	18220	rs3793577
11:70544937	genus.Escherichia.Shigella.id.3504	A/G	G	-0.03405	0.013	-2.6085	0.00909134	12110	rs7117514
18:52488672	genus.Actinomyces.id.423	C/T	T	0.05236	0.01938	2.6081	0.0091073	7594	rs62091461
5:87545318	phylum.Cyanobacteria.id.1500	C/T	C	-0.04394	0.01678	-2.6065	0.00914461	7197	rs3099439
7:12253880	family.Burkholderiaceae.id.2899	A/G	A	0.13548	0.052	2.6065	0.00914995	760	rs2043539
6:27835435	family.Bacteroidaceae.id.917	A/G	G	-0.04239	0.01629	-2.6055	0.00917135	17913	rs200949
6:27835435	genus.Bacteroides.id.918	A/G	G	-0.04239	0.01629	-2.6055	0.00917135	17913	rs200949
16:13755530	family.Erysipelotrichaceae.id.2149	A/G	G	-0.0312	0.01174	-2.6046	0.00919816	18350	rs56887639
16:13755530	order.Erysipelotrichales.id.2148	A/G	G	-0.0312	0.01174	-2.6046	0.00919816	18350	rs56887639
16:13755530	class.Erysipelotrichia.id.2147	A/G	G	-0.0312	0.01174	-2.6046	0.00919816	18350	rs56887639
7:82454404	genus.unknowngenus.id.964	C/G	C	0.07184	0.02775	2.6046	0.00919816	2640	rs2247523
18:52488672	class.Clostridia.id.1859	C/T	T	0.03227	0.01233	2.6041	0.00921428	18470	rs62091461
6:66565703	genus.Dialister.id.2183	T/C	C	-0.21795	0.08389	-2.6036	0.00922504	322	rs9363467
1:80809636	genus.RuminococcaceaeUCG011.id.11368	G/A	A	0.06657	0.02631	2.6026	0.00925198	3673	rs113188507
1:72765116	genus.Enterobacter.id.3502	G/A	G	-0.41464	0.15939	-2.6014	0.00928441	292	rs2568958
12:84465022	genus.Butyricimonas.id.945	G/T	G	0.04122	0.01597	2.6009	0.00930067	10785	rs56314503
20:39997404	family.vadinBE97.id.14446	G/T	T	-0.35808	0.13787	-2.5972	0.00939325	253	rs143186028
20:39997404	genus.unknowngenus.id.1000027565	G/T	T	-0.35808	0.13787	-2.5972	0.00939325	253	rs143186028
1:80809636	genus.Butyricicoccus.id.2055	G/A	A	-0.03096	0.0124	-2.5951	0.00945359	17267	rs113188507
5:61509655	genus.Parvimonas.id.1945	C/T	T	0.13347	0.0521	2.5948	0.00947011	716	rs60157091
9:2983774	genus.RuminococcaceaeUCG014.id.11371	A/C	C	-0.03031	0.01227	-2.5936	0.00949769	14535	rs1354115
6:142996618	genus.Enterococcus.id.1831	C/G	G	0.1098	0.04294	2.5936	0.00950322	1115	rs2876520
12:84465022	family.P5D1.392.id.1847	G/T	G	-0.41262	0.15916	-2.5924	0.00952535	97	rs56314503
12:84465022	genus.unknowngenus.id.1000040046	G/T	G	-0.41262	0.15916	-2.5924	0.00952535	97	rs56314503
16:13755530	family.Mitochondria.id.2805	A/G	G	0.10077	0.03923	2.5924	0.00953089	1497	rs56887639
16:13755530	genus.unknowngenus.id.1000000017	A/G	G	0.10077	0.03923	2.5924	0.00953089	1497	rs56887639
7:2110346	genus.Holdemania.id.2157	T/C	C	0.04664	0.01837	2.5919	0.00954753	9193	rs3823624
7:109099919	genus.LachnospiraceaeNC2004group.id.11316	A/G	G	-0.04489	0.01784	-2.5891	0.00961992	6461	rs58104186
9:126634255	family.Campylobacteraceae.id.3273	C/T	C	-0.14066	0.05393	-2.5885	0.0096367	860	rs2670139
3:157977962	genus.Butyrivibrio.id.1993	C/T	C	0.06241	0.02405	2.5885	0.00964229	3516	rs1095626
2:157111313	genus.Oscillibacter.id.2063	C/T	C	0.04885	0.01834	2.588	0.0096535	8966	rs1226412
10:106610839	genus.Undibacterium.id.2983	A/G	A	0.68307	0.26408	2.5866	0.0096928	25	rs1021363
3:117509984	genus.Tyzzerella.id.11334	C/T	T	-0.08287	0.0312	-2.5864	0.00969843	2591	rs6783233
7:82454404	genus.RikenellaceaeRC9gutgroup.id.11191	C/G	C	0.06372	0.02443	2.5857	0.00972097	3408	rs2247523
20:39997404	family.Bifidobacteriaceae.id.433	G/T	T	0.42088	0.15045	2.585	0.00974355	227	rs143186028
20:39997404	order.Bifidobacteriales.id.432	G/T	T	0.42088	0.15045	2.585	0.00974355	227	rs143186028
1:52342427	order.Coriobacteriales.id.810	T/C	C	-0.02826	0.01083	-2.5837	0.00977184	17824	rs1890946
1:52342427	class.Coriobacteriia.id.809	T/C	C	-0.02826	0.01083	-2.5837	0.00977184	17824	rs1890946
1:52342427	family.Coriobacteriaceae.id.811	T/C	C	-0.02826	0.01083	-2.5837	0.00977184	17824	rs1890946
1:175913828	family.Christensenellaceae.id.1866	T/C	T	0.02932	0.01127	2.5836	0.00978318	16980	rs10913112
1:72765116	genus.Howardella.id.2000	G/A	G	-0.06411	0.02389	-2.583	0.00979453	3835	rs2568958
7:82936909	order.Campylobacterales.id.3272	C/T	T	-0.1098	0.04101	-2.5827	0.00980021	1199	rs16887442
11:113370758	genus.Oxalobacter.id.2978	A/G	A	-0.0533	0.02164	-2.5807	0.00985717	4711	rs61902811
6:165121844	phylum.Firmicutes.id.1672	A/T	A	0.02712	0.01053	2.5775	0.00995467	18473	rs2029865
9:31124452	genus.unknowngenus.id.1000009363	C/G	C	0.47943	0.18603	2.5771	0.0099662	59	rs34653192
6:105365891	genus.Parvimonas.id.1945	C/G	C	-0.13594	0.05232	-2.5766	0.00997773	725	rs1933802
1:197704717	class.Clostridia.id.1859	C/T	T	0.03385	0.01354	2.5751	0.010024	18473	rs17641524
5:103972357	genus.Peptostreptococcus.id.2045	G/A	A	-0.2796	0.10855	-2.5744	0.0100414	179	rs30266
1:37192741	genus.Papillibacter.id.2065	T/C	C	0.11868	0.04551	2.5716	0.010123	1124	rs1002656
2:157111313	genus.Pseudobutyrivibrio.id.2010	C/T	C	0.10551	0.04127	2.5712	0.0101405	1706	rs1226412
1:197704717	order.Clostridiales.id.1863	C/T	T	0.03374	0.01354	2.5706	0.0101581	18473	rs17641524
12:121205078	genus.Methanobrevibacter.id.123	A/G	A	-0.06202	0.0237	-2.57	0.0101698	3586	rs3213572
11:57650796	genus.Finegoldia.id.1940	C/T	T	0.21545	0.08538	2.5677	0.0102405	352	rs2509805
1:52342427	genus.Coprococcus3.id.11303	T/C	C	-0.02893	0.01144	-2.5671	0.0102524	15968	rs1890946
12:23987925	phylum.Actinobacteria.id.400	T/G	G	-0.0449	0.01689	-2.5654	0.0103057	17194	rs78337797
1:37192741	genus.Acetitomaculum.id.1989	T/C	C	-0.21791	0.08494	-2.5636	0.0103593	320	rs1002656
1:50559162	genus.Hespellia.id.1999	A/G	G	0.44727	0.17457	2.5621	0.0104071	191	rs11579246
5:103972357	genus.Alkalitalea.id.931	G/A	A	-0.49222	0.19225	-2.5603	0.0104552	50	rs30266
1:37192741	genus.Actinomyces.id.423	T/C	C	-0.04637	0.01775	-2.5598	0.0104672	7594	rs1002656
13:53647048	genus.RuminococcaceaeUCG013.id.11370	C/A	A	0.02939	0.01129	2.5585	0.0105155	16904	rs1343605
2:86819128	genus.Tyzzerella.id.11334	T/C	C	0.09232	0.03843	2.5577	0.0105397	2594	rs7585722
11:30892824	genus.Methanosphaera.id.124	A/G	A	0.16416	0.06397	2.5573	0.0105518	514	rs1448938
1:72765116	genus.Bilophila.id.3170	G/A	G	0.03258	0.01298	2.5566	0.0105701	12962	rs2568958
12:84465022	genus.unknowngenus.id.964	G/T	G	-0.08182	0.03209	-2.5563	0.0105761	2641	rs56314503
12:84465022	genus.Enorma.id.13901	G/T	G	-0.545	0.21332	-2.5549	0.0106188	54	rs56314503
1:175913828	genus.Olsenella.id.822	T/C	T	-0.06149	0.02387	-2.555	0.0106188	3797	rs10913112
7:117502574	genus..Clostridiuminnocuumgroup.id.14397	T/C	C	0.05604	0.02189	2.5549	0.0106249	4252	rs7807677
20:44680853	genus.Anaerosporobacter.id.1990	A/G	A	-0.42079	0.16477	-2.5538	0.0106493	88	rs12624433
20:44680853	genus.PrevotellaceaeNK3B31group.id.11185	A/G	A	-0.10223	0.03929	-2.5509	0.0107414	1666	rs12624433
15:37643831	genus.Salinithrix.id.14356	C/T	C	0.59437	0.23314	2.5494	0.010797	33	rs8037355
1:52342427	family.Propionibacteriaceae.id.714	T/C	C	0.2973	0.11667	2.5481	0.0108343	141	rs1890946
18:77580712	genus.Finegoldia.id.1940	G/A	A	0.36087	0.14026	2.5472	0.0108653	178	rs7241572
1:72765116	genus.Collinsella.id.815	G/A	G	-0.03203	0.0122	-2.5469	0.0108653	14467	rs2568958
5:61509655	genus.RuminococcaceaeUCG011.id.11368	C/T	T	-0.05868	0.02326	-2.5466	0.0108778	3673	rs60157091
20:44680853	genus.Granulicatella.id.1821	A/G	A	-0.086	0.03339	-2.5458	0.0108965	2337	rs12624433
9:23737627	class.Flavobacteriia.id.1089	A/G	A	-0.23778	0.09353	-2.5432	0.010978	226	rs3793577
18:50731802	family.Comamonadaceae.id.2913	G/A	A	0.19034	0.07481	2.5433	0.0109842	354	rs7227069
13:66941792	genus.Lachnoclostridium5.id.11312	A/G	G	-0.61257	0.24098	-2.542	0.0110157	28	rs9592461
12:121205078	class.Methanobacteria.id.119	A/G	A	-0.06041	0.02334	-2.5414	0.0110346	3698	rs3213572
12:121205078	family.Methanobacteriaceae.id.121	A/G	A	-0.06041	0.02334	-2.5414	0.0110346	3698	rs3213572
7:12253880	family.Coriobacteriaceae.id.811	A/G	A	-0.0273	0.01076	-2.5415	0.0110346	17823	rs2043539
7:12253880	class.Coriobacteriia.id.809	A/G	A	-0.0273	0.01076	-2.5415	0.0110346	17823	rs2043539
7:12253880	order.Coriobacteriales.id.810	A/G	A	-0.0273	0.01076	-2.5415	0.0110346	17823	rs2043539
12:23987925	order.Pasteurellales.id.3688	T/G	G	0.06156	0.0236	2.5414	0.011041	8873	rs78337797
12:23987925	family.Pasteurellaceae.id.3689	T/G	G	0.06156	0.0236	2.5414	0.011041	8873	rs78337797
1:197704717	genus..Clostridiuminnocuumgroup.id.14397	C/T	T	0.07503	0.02793	2.5408	0.0110662	4252	rs17641524
1:80809636	genus.Acetanaerobacterium.id.2051	G/A	A	0.13011	0.04964	2.5393	0.0111106	1021	rs113188507
9:2983774	genus.unknowngenus.id.1854	A/C	C	-0.21889	0.08566	-2.5385	0.0111297	273	rs1354115
11:88744425	genus.Terrisporobacter.id.11348	C/T	T	0.04392	0.01729	2.5362	0.0112127	6770	rs7932640
7:12253880	genus.Tyzzerella4.id.11336	A/G	A	0.08879	0.0342	2.536	0.0112191	1728	rs2043539
7:2110346	genus.PrevotellaceaeNK3B31group.id.11185	T/C	C	-0.10818	0.04228	-2.5351	0.0112383	1675	rs3823624
9:2983774	genus.LachnospiraceaeUCG003.id.11323	A/C	C	-0.07533	0.02913	-2.5351	0.0112383	2552	rs1354115
9:31124452	genus.LachnospiraceaeUCG006.id.11326	C/G	C	0.54348	0.21439	2.535	0.0112511	43	rs34653192
6:27835435	family.Streptococcaceae.id.1850	A/G	G	0.04423	0.01707	2.5347	0.0112576	16297	rs200949
2:157111313	genus.LachnospiraceaeNC2004group.id.11316	C/T	C	-0.05409	0.02134	-2.5325	0.011322	6461	rs1226412
12:23987925	genus.Helicobacter.id.3279	T/G	G	0.36895	0.14936	2.5314	0.0113673	206	rs78337797
12:23987925	family.Helicobacteraceae.id.3278	T/G	G	0.36895	0.14936	2.5314	0.0113673	206	rs78337797
5:103972357	genus.Diaphorobacter.id.2928	G/A	A	-0.34445	0.13627	-2.5278	0.0114714	114	rs30266
18:50731802	genus.Anaerostipes.id.1991	G/A	A	-0.02848	0.01124	-2.5249	0.0115698	16265	rs7227069
6:27835435	genus.Anaerosporobacter.id.1990	A/G	G	0.74381	0.29482	2.5229	0.0116425	92	rs200949
9:119731045	genus.Anaerovirgula.id.1902	T/G	G	0.5365	0.21272	2.5221	0.011669	53	rs10817969
15:37643831	family.Defluviitaleaceae.id.1924	C/T	C	-0.03982	0.01574	-2.5217	0.0116756	8242	rs8037355
9:126634255	order.Bacillales.id.1674	C/T	C	0.07176	0.02762	2.5204	0.0117288	3363	rs2670139
13:99115041	genus.Pseudobutyrivibrio.id.2010	T/C	T	-0.08954	0.03516	-2.5199	0.0117355	1707	rs4772087
2:58012833	family.Helicobacteraceae.id.3278	C/T	T	0.24969	0.09821	2.5201	0.0117355	212	rs1568452
7:82936909	class.Epsilonproteobacteria.id.3268	C/T	T	-0.10717	0.04095	-2.5199	0.0117355	1203	rs16887442
11:30892824	genus.Hespellia.id.1999	A/G	A	0.25752	0.10219	2.5199	0.0117421	191	rs1448938
1:50559162	genus.Scardovia.id.440	A/G	G	0.59719	0.2371	2.5187	0.0117822	91	rs11579246
13:99115041	genus.Ruminococcus2.id.11374	T/C	T	-0.02995	0.01181	-2.5159	0.0118695	15472	rs4772087
2:208044470	genus..Ruminococcusgauvreauiigroup.id.11342	A/G	A	-0.0331	0.01324	-2.5154	0.011883	13510	rs62188629
9:36999369	genus.Veillonella.id.2198	C/T	T	0.03932	0.01504	2.5151	0.0119032	9412	rs7030813
1:175913828	genus.LachnospiraceaeNK4A136group.id.11319	T/C	T	0.02845	0.01114	2.5135	0.0119574	17369	rs10913112
2:58012833	genus.Acetitomaculum.id.1989	C/T	T	0.20439	0.07981	2.51	0.0120731	320	rs1568452
9:36999369	genus.unknowngenus.id.1000043796	C/T	T	-0.18678	0.07451	-2.5099	0.0120731	412	rs7030813
9:36999369	family.unknownfamily.id.1855	C/T	T	-0.18678	0.07451	-2.5099	0.0120731	412	rs7030813
18:52488672	family.Anaeroplasmataceae.id.3925	C/T	T	-0.12235	0.04916	-2.5095	0.0120868	1282	rs62091461
18:52488672	genus.Anaeroplasma.id.3926	C/T	T	-0.12235	0.04916	-2.5095	0.0120868	1282	rs62091461
18:52488672	order.Anaeroplasmatales.id.3924	C/T	T	-0.12235	0.04916	-2.5095	0.0120868	1282	rs62091461
14:64697037	genus.Asaccharobacter.id.813	T/C	T	0.09829	0.03848	2.5089	0.0121142	1379	rs1152578
6:142996618	genus.unknowngenus.id.1000077492	C/G	G	-0.43746	0.17152	-2.508	0.0121348	64	rs2876520
7:82454404	genus.Butyricimonas.id.945	C/G	C	-0.03529	0.01377	-2.5061	0.0122037	10785	rs2247523
18:52488672	genus.Dorea.id.1997	C/T	T	0.03126	0.01258	2.5061	0.0122106	17741	rs62091461
11:30892824	genus.LachnospiraceaeUCG004.id.11324	A/G	A	-0.02987	0.0119	-2.5035	0.0122937	14554	rs1448938
5:61509655	class.Synergistia.id.3899	C/T	T	0.11572	0.04545	2.5038	0.0122937	962	rs60157091
5:61509655	family.Synergistaceae.id.3901	C/T	T	0.11572	0.04545	2.5038	0.0122937	962	rs60157091
5:61509655	order.Synergistales.id.3900	C/T	T	0.11572	0.04545	2.5038	0.0122937	962	rs60157091
5:61509655	phylum.Synergistetes.id.3898	C/T	T	0.11572	0.04545	2.5038	0.0122937	962	rs60157091
14:42074726	family.Thermoanaerobacteraceae.id.2126	A/G	G	-0.07766	0.03056	-2.5016	0.0123634	2140	rs61990288
2:22503044	genus.Eubacterium.id.1932	T/A	A	-0.21482	0.08588	-2.5013	0.0123703	263	rs12052908
2:58012833	genus.Helicobacter.id.3279	C/T	T	0.24781	0.09824	2.5008	0.0123983	212	rs1568452
6:27835435	genus.Christensenella.id.1867	A/G	G	0.20102	0.07924	2.5002	0.0124193	825	rs200949
18:35138245	genus.Ruminiclostridium1.id.11354	G/A	A	-0.0934	0.03654	-2.4981	0.0124826	1689	rs12967855
2:86819128	genus.Caproiciproducens.id.14382	T/C	C	-0.16153	0.06385	-2.4976	0.0125037	821	rs7585722
7:2110346	family.ClostridialesvadinBB60group.id.11286	T/C	C	0.04347	0.01716	2.4974	0.0125108	10573	rs3823624
7:2110346	genus.unknowngenus.id.1000000073	T/C	C	0.04347	0.01716	2.4974	0.0125108	10573	rs3823624
7:2110346	genus.Sarcina.id.1896	T/C	C	0.27406	0.10669	2.4967	0.012539	254	rs3823624
4:123186393	genus.Holdemanella.id.11393	A/G	G	-0.09986	0.04028	-2.4943	0.012617	5909	rs45510091
11:57650796	genus.Butyricimonas.id.945	C/T	T	0.03829	0.01498	2.493	0.012674	10783	rs2509805
3:157977962	genus.unknowngenus.id.1961	C/T	C	-0.32732	0.13135	-2.4916	0.0127169	111	rs1095626
13:53647048	phylum.Verrucomicrobia.id.3982	C/A	A	0.03239	0.01307	2.4903	0.0127671	12515	rs1343605
14:42074726	order.Thermoanaerobacterales.id.2112	A/G	G	-0.07729	0.03055	-2.49	0.0127671	2141	rs61990288
14:104017953	class.Epsilonproteobacteria.id.3268	A/G	A	0.11701	0.0466	2.488	0.0128536	912	rs10149470
16:13755530	genus.RuminococcaceaeUCG007.id.11364	A/G	G	0.07195	0.02907	2.4872	0.0128753	2917	rs56887639
12:23987925	genus.Haemophilus.id.3698	T/G	G	0.06162	0.02398	2.4866	0.0129043	8602	rs78337797
9:120484009	family.unknownfamily.id.1000006161	A/G	G	-0.05071	0.02074	-2.4841	0.0129843	5107	rs913930
9:120484009	genus.unknowngenus.id.1000006162	A/G	G	-0.05071	0.02074	-2.4841	0.0129843	5107	rs913930
11:61471678	genus.Parabacteroides.id.954	C/T	T	0.03671	0.01443	2.4837	0.0130062	16958	rs198457
6:142996618	family.Victivallaceae.id.2255	C/G	G	-0.05834	0.02335	-2.4815	0.0130794	3666	rs2876520
9:119731045	family.Clostridiaceae1.id.1869	T/G	G	0.03246	0.01306	2.4807	0.0131162	14383	rs10817969
12:121205078	genus.Leuconostoc.id.1841	A/G	A	0.08923	0.03524	2.4798	0.013153	1598	rs3213572
6:27835435	genus.unknowngenus.id.2163	A/G	G	0.10953	0.04592	2.479	0.0131751	2295	rs200949
7:12253880	genus.LachnospiraceaeUCG006.id.11326	A/G	A	-0.516	0.20826	-2.4777	0.0132195	43	rs2043539
1:175913828	genus.Paraprevotella.id.962	T/C	T	-0.04261	0.01715	-2.4756	0.0133013	7287	rs10913112
1:52342427	family.unknownfamily.id.987	T/C	C	0.07365	0.0297	2.4757	0.0133013	2279	rs1890946
1:52342427	genus.unknowngenus.id.1000013899	T/C	C	0.07365	0.0297	2.4757	0.0133013	2279	rs1890946
7:12253880	genus.Citrobacter.id.3497	A/G	A	-0.19318	0.07769	-2.4734	0.0133759	345	rs2043539
8:65562019	genus.Erysipelatoclostridium.id.11381	T/G	T	0.05031	0.02045	2.4725	0.0134209	9911	rs7837935
1:37192741	order.Actinomycetales.id.420	T/C	C	-0.04404	0.01747	-2.4718	0.013436	7837	rs1002656
16:13755530	genus.Porphyromonas.id.956	A/G	G	-0.09331	0.03763	-2.4715	0.013451	1708	rs56887639
6:142996618	family.Peptostreptococcaceae.id.2042	C/G	G	0.02812	0.01138	2.4717	0.013451	15717	rs2876520
8:65562019	genus.RuminococcaceaeUCG009.id.11366	T/G	T	-0.05981	0.02335	-2.4712	0.0134585	7565	rs7837935
12:121205078	genus..Ruminococcusgauvreauiigroup.id.11342	A/G	A	0.03011	0.01221	2.471	0.0134811	13515	rs3213572
7:117502574	genus..Ruminococcusgauvreauiigroup.id.11342	T/C	C	-0.03061	0.01231	-2.4696	0.0135264	13515	rs7807677
9:120484009	genus.Sellimonas.id.14369	A/G	G	0.0653	0.02614	2.4694	0.013534	3202	rs913930
13:53647048	family.unknownfamily.id.987	C/A	A	0.07493	0.03041	2.4693	0.0135415	2279	rs1343605
13:53647048	genus.unknowngenus.id.1000013899	C/A	A	0.07493	0.03041	2.4693	0.0135415	2279	rs1343605
18:50731802	genus.RuminococcaceaeV9D2013group.id.11372	G/A	A	-0.1608	0.06485	-2.469	0.0135415	469	rs7227069
1:72765116	genus.Halomonas.id.3616	G/A	G	0.16243	0.06544	2.4691	0.0135491	484	rs2568958
1:197704717	genus.Weissella.id.1843	C/T	T	0.17997	0.07894	2.4688	0.0135567	685	rs17641524
7:109099919	family.Carnobacteriaceae.id.1811	A/G	G	0.06929	0.02789	2.4673	0.0136174	2593	rs58104186
5:103972357	order.Actinomycetales.id.420	G/A	A	-0.04192	0.01704	-2.466	0.0136555	7837	rs30266
14:42074726	genus.Gelria.id.2134	A/G	G	-0.07822	0.03125	-2.4647	0.013709	2047	rs61990288
1:73668836	genus.unknowngenus.id.1000077492	A/G	A	-0.51426	0.18725	-2.4646	0.0137166	64	rs10890020
11:113370758	family.Oxalobacteraceae.id.2966	A/G	A	-0.04855	0.02054	-2.4641	0.0137319	5234	rs61902811
2:58012833	genus.Olsenella.id.822	C/T	T	0.05866	0.02356	2.4636	0.013755	3797	rs1568452
4:3207142	genus.Shuttleworthia.id.2013	A/G	G	-0.54672	0.22193	-2.4635	0.013755	36	rs7685686
9:126634255	order.Campylobacterales.id.3272	C/T	C	-0.11593	0.04574	-2.4622	0.0138011	1197	rs2670139
1:175913828	genus.Collinsella.id.815	T/C	T	0.03037	0.01222	2.4622	0.0138165	14467	rs10913112
14:104017953	order.Campylobacterales.id.3272	A/G	A	0.11597	0.04671	2.4609	0.0138628	908	rs10149470
9:126634255	class.Epsilonproteobacteria.id.3268	C/T	C	-0.11592	0.04567	-2.46	0.013886	1201	rs2670139
5:164523472	genus.ErysipelotrichaceaeUCG004.id.11385	C/A	A	-0.18999	0.07686	-2.4599	0.0138937	336	rs11135349
12:121205078	genus.Propionibacterium.id.727	A/G	A	-0.29439	0.11972	-2.4591	0.0139247	134	rs3213572
15:47684936	genus.Tyzzerella4.id.11336	T/C	C	-0.10795	0.04308	-2.4587	0.0139402	1577	rs34488670
9:126634255	genus.LachnospiraceaeNC2004group.id.11316	C/T	C	-0.05086	0.02008	-2.4584	0.0139558	6460	rs2670139
1:181740924	genus.Coprobacillus.id.2154	G/A	G	0.10659	0.04248	2.4572	0.0140103	1464	rs169235
1:73668836	genus.RuminococcaceaeUCG005.id.11363	A/G	A	0.02753	0.01118	2.4571	0.0140103	16235	rs10890020
9:120484009	genus..Ruminococcusgauvreauiigroup.id.11342	A/G	G	0.03265	0.01299	2.457	0.0140103	13515	rs913930
11:57650796	genus.Anaerococcus.id.1937	C/T	T	0.16514	0.06636	2.4564	0.0140415	551	rs2509805
6:165121844	genus.PrevotellaceaeNK3B31group.id.11185	A/T	A	0.08487	0.03452	2.4563	0.0140415	1675	rs2029865
3:44736493	genus.unknowngenus.id.1000000073	T/C	C	0.18343	0.07587	2.4554	0.0140728	453	rs4346585
3:44736493	family.ClostridialesvadinBB60group.id.11286	T/C	C	0.18343	0.07587	2.4554	0.0140728	453	rs4346585
1:37192741	family.Actinomycetaceae.id.421	T/C	C	-0.04374	0.01747	-2.4541	0.0141198	7836	rs1002656
15:37643831	genus.DefluviitaleaceaeUCG011.id.11287	C/T	C	-0.03877	0.01576	-2.4527	0.0141749	8222	rs8037355
16:6315880	genus.Samsonia.id.14644	A/G	G	0.3878	0.15825	2.4505	0.0142698	102	rs7193263
1:52342427	genus.Eubacterium.id.1932	T/C	C	0.21373	0.08658	2.4505	0.0142698	263	rs1890946
14:60141822	class.Mollicutes.id.3920	T/G	G	-0.0397	0.01516	-2.4497	0.0142936	11482	rs1956373
14:60141822	phylum.Tenericutes.id.3919	T/G	G	-0.0397	0.01516	-2.4497	0.0142936	11482	rs1956373
8:65562019	genus.Ruminiclostridium9.id.11357	T/G	T	-0.03801	0.01562	-2.4496	0.0142936	16845	rs7837935
1:181740924	genus.Porphyromonas.id.956	G/A	G	-0.09763	0.03969	-2.4492	0.0143174	1707	rs169235
9:23737627	genus.unknowngenus.id.1000073287	A/G	A	-0.339	0.13845	-2.4485	0.0143413	101	rs3793577
9:23737627	order.Thermomicrobiales.id.1489	A/G	A	-0.339	0.13845	-2.4485	0.0143413	101	rs3793577
9:23737627	phylum.Chloroflexi.id.1385	A/G	A	-0.339	0.13845	-2.4485	0.0143413	101	rs3793577
9:23737627	class.Thermomicrobia.id.1482	A/G	A	-0.339	0.13845	-2.4485	0.0143413	101	rs3793577
9:23737627	family.Thermomicrobiaceae.id.1490	A/G	A	-0.339	0.13845	-2.4485	0.0143413	101	rs3793577
1:50559162	genus.unknowngenus.id.1000027565	A/G	G	-0.15243	0.06582	-2.4482	0.0143572	1319	rs11579246
1:50559162	family.vadinBE97.id.14446	A/G	G	-0.15243	0.06582	-2.4482	0.0143572	1319	rs11579246
1:67146817	genus.Pseudocitrobacter.id.14642	T/C	C	-0.12702	0.0515	-2.448	0.0143572	764	rs10789214
1:72765116	genus..Ruminococcusgauvreauiigroup.id.11342	G/A	G	-0.03192	0.01268	-2.4474	0.0143811	13515	rs2568958
20:39997404	genus.Ruminiclostridium6.id.11356	G/T	T	-0.24365	0.09849	-2.4468	0.0144131	517	rs143186028
6:66565703	family.Bacillaceae.id.1680	T/C	C	0.54293	0.22188	2.447	0.0144131	42	rs9363467
5:103972357	family.Actinomycetaceae.id.421	G/A	A	-0.04158	0.01704	-2.4462	0.0144291	7836	rs30266
11:61471678	genus.Hungatella.id.11306	C/T	T	0.07119	0.02908	2.4464	0.0144371	4039	rs198457
14:60141822	family.Veillonellaceae.id.2172	T/G	G	0.03055	0.01275	2.4454	0.0144692	16108	rs1956373
16:13066833	genus.Lachnoclostridium12.id.11311	C/T	T	-0.379	0.1769	-2.4435	0.0145415	135	rs7200826
16:21639710	genus.Butyricimonas.id.945	C/A	C	-0.03389	0.01381	-2.4425	0.0145819	10708	rs12923444
6:66565703	genus.Intestinimonas.id.2062	T/C	C	-0.18459	0.07568	-2.4425	0.0145819	397	rs9363467
18:35138245	genus.unknowngenus.id.826	G/A	A	-0.03203	0.01297	-2.4424	0.01459	13403	rs12967855
4:123186393	class.Betaproteobacteria.id.2867	A/G	G	-0.06999	0.02859	-2.4421	0.0145981	11715	rs45510091
9:119731045	genus.Clostridiumsensustricto1.id.1873	T/G	G	0.03206	0.01312	2.441	0.0146548	14251	rs10817969
9:36999369	genus.Clostridiumsensustricto19.id.1883	C/T	T	-0.5489	0.22499	-2.4396	0.0147035	37	rs7030813
5:87545318	genus.Terrisporobacter.id.11348	C/T	C	0.04239	0.01731	2.4394	0.0147117	6770	rs3099439
1:73668836	genus.Prevotella.id.963	A/G	A	0.07036	0.0288	2.4391	0.014728	2440	rs10890020
3:49214066	genus.Parasporobacterium.id.2009	A/G	G	-0.20577	0.08631	-2.4376	0.0147851	389	rs13084037
2:86819128	genus.RuminococcaceaeUCG002.id.11360	T/C	C	-0.03925	0.01507	-2.4374	0.0147933	16509	rs7585722
11:61471678	genus.DefluviitaleaceaeUCG011.id.11287	C/T	T	0.05278	0.02076	2.437	0.0148097	8024	rs198457
5:61509655	genus.Ruminiclostridium5.id.11355	C/T	T	-0.02616	0.01072	-2.4359	0.0148507	17514	rs60157091
14:75130235	genus.Klebsiella.id.3507	T/G	T	-0.12163	0.048	-2.435	0.0148836	893	rs1045430
6:142996618	order.Anaeroplasmatales.id.3924	C/G	G	-0.11213	0.04559	-2.4346	0.0149	953	rs2876520
6:142996618	genus.Anaeroplasma.id.3926	C/G	G	-0.11213	0.04559	-2.4346	0.0149	953	rs2876520
6:142996618	family.Anaeroplasmataceae.id.3925	C/G	G	-0.11213	0.04559	-2.4346	0.0149	953	rs2876520
7:82454404	genus..Eubacteriumventriosumgroup.id.11341	C/G	C	-0.02772	0.01151	-2.4332	0.0149578	15419	rs2247523
2:157111313	genus.Ruminiclostridium6.id.11356	C/T	C	0.03564	0.01494	2.4333	0.014966	13508	rs1226412
7:2110346	genus.LachnospiraceaeUCG008.id.11328	T/C	C	-0.05078	0.02108	-2.433	0.0149743	7140	rs3823624
1:50559162	genus.RikenellaceaeRC9gutgroup.id.11191	A/G	G	-0.09411	0.04007	-2.4327	0.0149826	3245	rs11579246
8:65562019	genus.Holdemanella.id.11393	T/G	T	0.05467	0.02291	2.4325	0.0149991	7839	rs7837935
7:12253880	genus.Faecalibacterium.id.2057	A/G	A	0.02608	0.01065	2.4323	0.0150074	18218	rs2043539
7:117502574	genus.Faecalitalea.id.11392	T/C	C	-0.06564	0.02691	-2.4318	0.015024	2817	rs7807677
16:7666402	genus.CoriobacteriaceaeUCG002.id.11158	C/T	C	-0.19267	0.07953	-2.4299	0.0150988	334	rs7198928
1:80809636	genus.RuminococcaceaeUCG010.id.11367	G/A	A	0.03313	0.01423	2.4297	0.0151155	13001	rs113188507
11:57650796	genus.Faecalicoccus.id.11391	C/T	T	-0.26867	0.11054	-2.4289	0.0151405	181	rs2509805
11:65314830	genus.Akkermansia.id.4037	A/T	T	0.04035	0.01632	2.4274	0.0152075	11997	rs58621819
16:13755530	genus..Eubacteriumventriosumgroup.id.11341	A/G	G	0.03048	0.0128	2.4269	0.0152327	15421	rs56887639
1:175913828	genus.Howardella.id.2000	T/C	T	0.05753	0.02367	2.4245	0.0153337	3835	rs10913112
1:73668836	genus.unknowngenus.id.1000000073	A/G	A	0.03396	0.01382	2.4245	0.0153337	10572	rs10890020
1:73668836	family.ClostridialesvadinBB60group.id.11286	A/G	A	0.03396	0.01382	2.4245	0.0153337	10572	rs10890020
9:120484009	genus.CandidatusSaccharimonas.id.11573	A/G	G	0.66889	0.27596	2.4239	0.0153591	23	rs913930
11:57650796	family.Porphyromonadaceae.id.943	C/T	T	0.02711	0.01161	2.4237	0.0153675	18150	rs2509805
7:12253880	phylum.Actinobacteria.id.400	A/G	A	-0.0258	0.01067	-2.4194	0.0155376	18122	rs2043539
5:87545318	family.Eubacteriaceae.id.1928	C/T	C	0.07182	0.02964	2.4193	0.0155547	2308	rs3099439
16:21639710	genus.Erysipelatoclostridium.id.11381	C/A	C	-0.03503	0.0144	-2.4177	0.0156147	9853	rs12923444
2:22503044	genus.FamilyXIIIUCG002.id.11295	T/A	A	-0.34381	0.14226	-2.4168	0.015649	93	rs12052908
4:42110353	genus..Clostridiuminnocuumgroup.id.14397	T/C	C	0.0867	0.03476	2.417	0.0156576	4061	rs34937911
7:2110346	genus.Pyramidobacter.id.3912	T/C	C	-1.67538	0.69382	-2.4147	0.0157439	15	rs3823624
10:106610839	family.Propionibacteriaceae.id.714	A/G	A	0.29574	0.1225	2.4142	0.0157698	141	rs1021363
1:181740924	genus.RuminococcaceaeNK4A214group.id.11358	G/A	G	-0.03253	0.01348	-2.4134	0.0157958	14823	rs169235
9:120484009	family.Victivallaceae.id.2255	A/G	G	0.05748	0.02344	2.4137	0.0157958	4028	rs913930
6:105365891	genus.Rikenella.id.973	C/G	C	-0.32459	0.13445	-2.412	0.0158566	108	rs1933802
11:65314830	family.Verrucomicrobiaceae.id.4036	A/T	T	0.04001	0.01632	2.4083	0.0160314	11998	rs58621819
6:105365891	genus.Ruminiclostridium.id.11353	C/G	C	-0.12666	0.0525	-2.4079	0.0160402	730	rs1933802
3:117509984	genus.FamilyXIIIUCG001.id.11294	C/T	T	-0.03476	0.01428	-2.4077	0.016049	12413	rs6783233
17:27363750	order.Alteromonadales.id.3333	G/A	A	0.3078	0.12709	2.4072	0.0160754	295	rs75581564
16:13066833	genus.FamilyXIIIUCG002.id.11295	C/T	T	-0.38703	0.16081	-2.4068	0.0160842	93	rs7200826
11:65314830	order.Verrucomicrobiales.id.4030	A/T	T	0.03999	0.01632	2.4067	0.0161018	11998	rs58621819
11:65314830	class.Verrucomicrobiae.id.4029	A/T	T	0.03999	0.01632	2.4067	0.0161018	11998	rs58621819
6:66565703	genus.Butyricimonas.id.945	T/C	C	-0.26579	0.1107	-2.4066	0.0161018	179	rs9363467
14:42074726	genus.Porphyromonas.id.956	A/G	G	-0.08238	0.0341	-2.4063	0.0161106	1708	rs61990288
7:82454404	genus.Weissella.id.1843	C/G	C	0.14207	0.06092	2.4055	0.0161548	684	rs2247523
3:157977962	family.Clostridiaceae1.id.1869	C/T	C	0.02851	0.01194	2.4019	0.0163146	14386	rs1095626
1:73668836	genus.Slackia.id.825	A/G	A	-0.04463	0.01821	-2.3992	0.016422	6088	rs10890020
5:103972357	genus.Anaerostipes.id.1991	G/A	A	-0.02768	0.01177	-2.3989	0.0164399	17054	rs30266
16:7666402	genus.Oscillospira.id.2064	C/T	C	-0.03479	0.01449	-2.3983	0.0164669	10243	rs7198928
9:2983774	genus.Sarcina.id.1896	A/C	C	-0.21953	0.09081	-2.3967	0.016539	254	rs1354115
9:2983774	genus.unknowngenus.id.826	A/C	C	-0.03074	0.01276	-2.396	0.016566	13405	rs1354115
14:64697037	genus.Rikenella.id.973	T/C	T	0.32729	0.13572	2.3958	0.0165841	108	rs1152578
6:27835435	class.Bacilli.id.1673	A/G	G	0.04101	0.01673	2.3939	0.0166748	17009	rs200949
14:75130235	genus.RuminococcaceaeUCG011.id.11368	T/G	T	0.05531	0.02333	2.3937	0.0166839	3673	rs1045430
14:64697037	genus.Holdemania.id.2157	T/C	T	-0.03558	0.01488	-2.3932	0.0167021	9193	rs1152578
6:142996618	genus.Victivallis.id.2256	C/G	G	-0.0619	0.02567	-2.392	0.0167568	3035	rs2876520
20:44680853	family.16d63.751.id.1801	A/G	A	-0.14764	0.06171	-2.3916	0.0167751	689	rs12624433
20:44680853	genus.unknowngenus.id.1000071828	A/G	A	-0.14764	0.06171	-2.3916	0.0167751	689	rs12624433
8:65562019	family.Rikenellaceae.id.967	T/G	T	-0.03737	0.01516	-2.3903	0.01683	17813	rs7837935
1:72765116	genus.RuminococcaceaeUCG004.id.11362	G/A	G	0.03539	0.01496	2.3902	0.0168392	9635	rs2568958
11:61471678	family.vadinBE97.id.14446	C/T	T	-0.13214	0.0562	-2.3884	0.0169219	1066	rs198457
11:61471678	genus.unknowngenus.id.1000027565	C/T	T	-0.13214	0.0562	-2.3884	0.0169219	1066	rs198457
11:88744425	genus..Eubacteriumfissicatenagroup.id.14373	C/T	T	-0.0549	0.02283	-2.3882	0.0169219	3877	rs7932640
6:142996618	genus.Anaerofustis.id.1931	C/G	G	0.0868	0.03632	2.388	0.0169403	1512	rs2876520
14:60141822	family.Corynebacteriaceae.id.448	T/G	G	-0.13914	0.05658	-2.386	0.0170327	828	rs1956373
20:39997404	genus..Eubacteriumhalliigroup.id.11338	G/T	T	0.25805	0.10833	2.3851	0.0170791	438	rs143186028
5:103972357	genus..Eubacteriumoxidoreducensgroup.id.11339	G/A	A	-0.0509	0.02111	-2.384	0.0171256	5404	rs30266
3:157977962	genus.Alloscardovia.id.435	C/T	C	0.34018	0.14276	2.3829	0.0171815	95	rs1095626
4:3207142	genus.possiblegenusSk018.id.2019	A/G	G	-0.39424	0.16547	-2.3826	0.0171815	70	rs7685686
8:65562019	genus.Desulfovibrio.id.3173	T/G	T	-0.05034	0.0211	-2.3826	0.0171909	9338	rs7837935
14:75130235	genus.RuminococcaceaeUCG010.id.11367	T/G	T	0.03029	0.01243	2.3817	0.0172376	13001	rs1045430
18:52488672	genus.CandidatusSoleaferrea.id.11350	C/T	T	0.05039	0.02152	2.381	0.0172751	6202	rs62091461
11:61471678	genus.Escherichia.Shigella.id.3504	C/T	T	0.04042	0.01723	2.3804	0.0172938	11963	rs198457
9:119731045	genus.RuminococcaceaeNK4A214group.id.11358	T/G	G	0.03003	0.01262	2.3796	0.0173409	15418	rs10817969
5:103972357	family.Gracilibacteraceae.id.1975	G/A	A	0.48807	0.20517	2.3789	0.0173691	44	rs30266
5:103972357	genus.unknowngenus.id.1978	G/A	A	0.48807	0.20517	2.3789	0.0173691	44	rs30266
18:50731802	genus.Asaccharospora.id.11344	G/A	A	-0.48271	0.20296	-2.3783	0.0173879	43	rs7227069
1:175913828	genus.Paeniclostridium.id.14378	T/C	T	0.48672	0.20463	2.3785	0.0173879	45	rs10913112
1:67146817	family.Neisseriaceae.id.3010	T/C	C	0.45509	0.19137	2.3781	0.0174068	50	rs10789214
3:157977962	genus.Shuttleworthia.id.2013	C/T	C	0.53142	0.22351	2.3776	0.0174257	36	rs1095626
13:66941792	genus.Coprobacter.id.949	A/G	G	-0.04069	0.01709	-2.3764	0.0174825	6867	rs9592461
4:123186393	phylum.Euryarchaeota.id.55	A/G	G	0.13799	0.06038	2.3765	0.0174825	2572	rs45510091
18:53099012	family.unknownfamily.id.1855	G/C	G	0.17672	0.07282	2.3755	0.0175299	409	rs12967143
18:53099012	genus.unknowngenus.id.1000043796	G/C	G	0.17672	0.07282	2.3755	0.0175299	409	rs12967143
4:3207142	genus.ErysipelotrichaceaeUCG006.id.11386	A/G	G	0.21911	0.09204	2.3754	0.0175299	239	rs7685686
1:72765116	genus.Weissella.id.1843	G/A	G	0.20625	0.07629	2.3751	0.017549	685	rs2568958
1:8489302	order.Propionibacteriales.id.704	T/C	C	0.27612	0.11626	2.375	0.0175585	145	rs301799
14:64697037	genus.Erysipelatoclostridium.id.11381	T/C	T	-0.03428	0.01435	-2.3702	0.0177785	9911	rs1152578
9:31124452	genus.ChristensenellaceaeR.7group.id.11283	C/G	C	0.02872	0.01203	2.3669	0.0179426	16031	rs34653192
5:164523472	genus.possiblegenusSk018.id.2019	C/A	A	-0.38742	0.16381	-2.3651	0.0180203	70	rs11135349
18:52488672	family.Ruminococcaceae.id.2050	C/T	T	0.02903	0.01233	2.3648	0.0180398	18465	rs62091461
18:35138245	family.Planococcaceae.id.1753	G/A	A	-0.59571	0.25196	-2.3643	0.0180593	29	rs12967855
13:99115041	genus.Paeniclostridium.id.14378	T/C	T	-0.50553	0.21384	-2.3641	0.0180691	45	rs4772087
14:64697037	genus.unknowngenus.id.1000043796	T/C	T	-0.16605	0.07032	-2.3638	0.0180886	416	rs1152578
14:64697037	family.unknownfamily.id.1855	T/C	T	-0.16605	0.07032	-2.3638	0.0180886	416	rs1152578
7:82454404	genus.LachnospiraceaeUCG010.id.11330	C/G	C	0.02944	0.01242	2.3637	0.0180983	13319	rs2247523
8:65562019	genus.Solobacterium.id.2161	T/G	T	-0.11341	0.04859	-2.363	0.0181179	1858	rs7837935
1:80809636	genus.LachnospiraceaeUCG009.id.11329	G/A	A	-0.41642	0.17628	-2.3623	0.018157	74	rs113188507
1:8489302	phylum.Bacteroidetes.id.905	T/C	C	-0.0252	0.01065	-2.362	0.0181766	18466	rs301799
9:126634255	genus.Anaerotruncus.id.2054	C/T	C	-0.0279	0.01235	-2.3607	0.0182356	16683	rs2670139
10:1795194	genus.Victivallis.id.2256	C/T	T	-0.05959	0.02517	-2.3605	0.0182454	3377	rs997934
8:65562019	genus.Eubacterium.id.1932	T/G	T	0.3008	0.12743	2.3608	0.0182454	263	rs7837935
16:13755530	genus.Succinispira.id.2170	A/G	G	0.51092	0.21646	2.3603	0.0182651	47	rs56887639
7:82936909	genus.Megamonas.id.2184	C/T	T	0.10516	0.04439	2.3596	0.0183045	1015	rs16887442
4:3207142	genus.Dorea.id.1997	A/G	G	0.02531	0.01074	2.3593	0.0183144	17741	rs7685686
9:23737627	genus.CoriobacteriaceaeUCG002.id.11158	A/G	A	0.18298	0.07732	2.3592	0.0183243	334	rs3793577
1:52342427	genus.Parasporobacterium.id.2009	T/C	C	0.18967	0.06578	2.358	0.0183737	670	rs1890946
13:66941792	genus.Succiniclasticum.id.2169	A/G	G	-0.48002	0.20365	-2.3571	0.0184133	43	rs9592461
20:44680853	genus.Eisenbergiella.id.11304	A/G	A	0.05223	0.02163	2.3572	0.0184133	5619	rs12624433
18:52488672	genus.unknowngenus.id.1000009363	C/T	T	-0.50236	0.21313	-2.357	0.0184232	59	rs62091461
6:66565703	genus.Bacillus.id.1688	T/C	C	0.53671	0.22773	2.3568	0.0184332	40	rs9363467
11:61471678	family.Defluviitaleaceae.id.1924	C/T	T	0.05107	0.02074	2.3566	0.018453	8043	rs198457
1:50559162	genus.possiblegenusSk018.id.2019	A/G	G	-0.6652	0.2823	-2.3564	0.018453	70	rs11579246
12:23987925	genus.Acinetobacter.id.3711	T/G	G	0.24362	0.10075	2.3554	0.0185028	492	rs78337797
14:60141822	genus.Holdemanella.id.11393	T/G	G	0.04319	0.01835	2.355	0.0185327	7838	rs1956373
1:50559162	genus.Isobaculum.id.1822	A/G	G	0.9977	0.42365	2.355	0.0185327	28	rs11579246
3:61192911	genus.Dielma.id.11380	A/G	A	-0.82585	0.35074	-2.3546	0.0185427	11	rs141954845
9:126634255	genus.Leuconostoc.id.1841	C/T	C	-0.09482	0.04019	-2.3541	0.0185626	1594	rs2670139
20:44680853	genus..Eubacteriumfissicatenagroup.id.14373	A/G	A	0.06046	0.02603	2.3524	0.0186527	3845	rs12624433
3:49214066	family.Oxalobacteraceae.id.2966	A/G	G	0.05696	0.02356	2.3525	0.0186527	5063	rs13084037
11:61471678	order.Desulfovibrionales.id.3156	C/T	T	0.03768	0.01534	2.3518	0.0186929	14961	rs198457
20:39997404	phylum.Lentisphaerae.id.2238	G/T	T	-0.2575	0.10874	-2.3511	0.018713	418	rs143186028
18:52488672	genus.Ruminiclostridium.id.11353	C/T	T	0.14498	0.06144	2.3509	0.0187331	730	rs62091461
3:157977962	genus..Eubacteriumventriosumgroup.id.11341	C/T	C	0.02713	0.01153	2.3509	0.0187331	15421	rs1095626
11:61471678	family.Desulfovibrionaceae.id.3169	C/T	T	0.03766	0.01534	2.3506	0.0187432	14958	rs198457
14:42074726	genus.Mannheimia.id.3701	A/G	G	0.53594	0.22799	2.3507	0.0187432	33	rs61990288
14:64697037	genus.Hungatella.id.11306	T/C	T	-0.05187	0.0219	-2.3487	0.018834	4279	rs1152578
11:61471678	class.Deltaproteobacteria.id.3087	C/T	T	0.03747	0.01533	2.3484	0.0188543	14985	rs198457
11:65314830	genus.Dielma.id.11380	A/T	T	-0.09739	0.04088	-2.3466	0.0189354	1885	rs58621819
1:175913828	genus.ErysipelotrichaceaeUCG004.id.11385	T/C	T	0.18606	0.0792	2.3468	0.0189456	337	rs10913112
5:93071630	genus.Butyricicoccus.id.2055	G/C	C	0.03302	0.01326	2.3463	0.0189659	17267	rs10061069
9:2983774	genus.Finegoldia.id.1940	A/C	C	-0.17757	0.07549	-2.3461	0.0189659	356	rs1354115
1:67146817	genus.ErysipelotrichaceaeUCG004.id.11385	T/C	C	0.18299	0.07773	2.3461	0.0189761	337	rs10789214
4:42110353	family.Comamonadaceae.id.2913	T/C	C	-0.28273	0.12016	-2.3445	0.0190475	354	rs34937911
6:165121844	genus..Ruminococcustorquesgroup.id.14377	A/T	A	0.0243	0.01069	2.3447	0.0190475	17931	rs2029865
5:164523472	genus.unknowngenus.id.2071	C/A	A	-0.03056	0.01276	-2.3443	0.0190577	12748	rs11135349
9:2983774	family.Rhodospirillaceae.id.2717	A/C	C	0.03631	0.01583	2.344	0.0190884	8543	rs1354115
9:17016503	genus.Burkholderia.Paraburkholderia.id.14563	T/A	T	-0.15092	0.06439	-2.3429	0.0191294	478	rs263645
4:3207142	genus.Coprococcus3.id.11303	A/G	G	0.02655	0.01132	2.3423	0.0191704	15966	rs7685686
7:117502574	family.Micrococcaceae.id.636	T/C	C	0.07509	0.03183	2.3419	0.019191	2008	rs7807677
1:67146817	order.Cytophagales.id.990	T/C	C	-0.40546	0.17319	-2.3412	0.0192116	64	rs10789214
1:67146817	class.Cytophagia.id.989	T/C	C	-0.40546	0.17319	-2.3412	0.0192116	64	rs10789214
12:23987925	order.Campylobacterales.id.3272	T/G	G	0.14262	0.06362	2.3414	0.0192219	1175	rs78337797
7:109099919	genus.Alkalitalea.id.931	A/G	G	-0.44541	0.19031	-2.3404	0.0192528	50	rs58104186
1:37192741	genus.Asaccharobacter.id.813	T/C	C	-0.0978	0.04153	-2.3392	0.0193147	1379	rs1002656
18:50731802	genus.Turicibacter.id.2162	G/A	A	0.03579	0.01522	2.3361	0.0194912	8791	rs7227069
10:1795194	genus.Citrobacter.id.3497	C/T	T	-0.17896	0.07611	-2.3353	0.0195225	345	rs997934
9:36999369	phylum.Saccharibacteria.id.11569	C/T	T	0.06526	0.02811	2.3351	0.0195434	2705	rs7030813
9:36999369	order.unknownorder.id.11571	C/T	T	0.06526	0.02811	2.3351	0.0195434	2705	rs7030813
9:36999369	class.unknownclass.id.11570	C/T	T	0.06526	0.02811	2.3351	0.0195434	2705	rs7030813
9:36999369	family.unknownfamily.id.11572	C/T	T	0.06526	0.02811	2.3351	0.0195434	2705	rs7030813
14:60141822	genus.Dialister.id.2183	T/G	G	0.03442	0.01471	2.334	0.0195957	12121	rs1956373
16:21639710	genus.LachnospiraceaeNK4B4group.id.11320	C/A	C	-0.07993	0.03406	-2.3331	0.0196376	1732	rs12923444
18:53099012	family.Moraxellaceae.id.3710	G/C	G	-0.14432	0.06208	-2.3331	0.0196376	616	rs12967143
1:181740924	family.Bacteroidaceae.id.917	G/A	G	0.02881	0.01234	2.3326	0.0196691	17622	rs169235
1:181740924	genus.Bacteroides.id.918	G/A	G	0.02881	0.01234	2.3326	0.0196691	17622	rs169235
1:8489302	class.Bacteroidia.id.912	T/C	C	-0.02488	0.01065	-2.3324	0.0196691	18465	rs301799
1:8489302	order.Bacteroidales.id.913	T/C	C	-0.02488	0.01065	-2.3324	0.0196691	18465	rs301799
13:66941792	genus.Murdochiella.id.1944	A/G	G	-0.77217	0.33115	-2.3318	0.0197007	13	rs9592461
1:73668836	genus.Eubacterium.id.1932	A/G	A	0.2019	0.08579	2.3316	0.0197323	263	rs10890020
11:70544937	genus.unknowngenus.id.959	A/G	G	0.04856	0.02063	2.3313	0.0197428	4894	rs7117514
5:103972357	family.Clostridiaceae1.id.1869	G/A	A	-0.02948	0.01278	-2.3308	0.0197534	14381	rs30266
3:61192911	genus.Prevotella6.id.11181	A/G	A	-0.31925	0.13699	-2.3305	0.0197745	108	rs141954845
8:65562019	genus.Parabacteroides.id.954	T/G	T	-0.03479	0.01528	-2.3305	0.0197745	17438	rs7837935
7:82454404	genus.Lactobacillus.id.1837	C/G	C	-0.04006	0.01702	-2.3299	0.0198062	7090	rs2247523
9:23737627	genus.Dielma.id.11380	A/G	A	-0.07613	0.0325	-2.3297	0.0198167	1885	rs3793577
1:197704717	order.OpitutaevadinHA64.id.11585	C/T	T	-0.10242	0.04523	-2.3288	0.0198591	1616	rs17641524
1:197704717	genus.unknowngenus.id.1000000272	C/T	T	-0.10242	0.04523	-2.3288	0.0198591	1616	rs17641524
1:197704717	family.unknownfamily.id.1000000271	C/T	T	-0.10242	0.04523	-2.3288	0.0198591	1616	rs17641524
1:72765116	order.Aeromonadales.id.3316	G/A	G	0.24428	0.105	2.3265	0.0199972	231	rs2568958
14:60141822	genus.Mannheimia.id.3701	T/G	G	-0.60914	0.26195	-2.3254	0.0200506	33	rs1956373
18:52488672	genus.Mannheimia.id.3701	C/T	T	-0.65806	0.28299	-2.3254	0.0200506	33	rs62091461
16:13066833	genus..Eubacteriumtenuegroup.id.14380	C/T	T	-0.35788	0.15859	-2.3251	0.0200613	166	rs7200826
6:142996618	family.Neisseriaceae.id.3010	C/G	G	0.44391	0.1909	2.3254	0.0200613	50	rs2876520
15:37643831	family.Thermoactinomycetaceae.id.1782	C/T	C	0.54266	0.23342	2.3248	0.0200934	34	rs8037355
1:52342427	genus.unknowngenus.id.3624	T/C	C	0.21597	0.09253	2.3247	0.0200934	229	rs1890946
9:126634255	genus.Lactobacillus.id.1837	C/T	C	0.04455	0.01902	2.3242	0.0201148	7087	rs2670139
1:72765116	genus.unknowngenus.id.964	G/A	G	0.068	0.02879	2.3233	0.0201684	2641	rs2568958
18:50731802	genus.Pseudoflavonifractor.id.2066	G/A	A	0.06788	0.02903	2.3232	0.0201791	2395	rs7227069
14:64697037	genus.Ruminiclostridium5.id.11355	T/C	T	-0.02527	0.0108	-2.3224	0.0202007	17530	rs1152578
12:23987925	class.Epsilonproteobacteria.id.3268	T/G	G	0.14053	0.0635	2.3225	0.0202114	1178	rs78337797
1:37192741	genus.Alloscardovia.id.435	T/C	C	0.36713	0.15808	2.3225	0.0202114	95	rs1002656
6:142996618	genus..Eubacteriumnodatumgroup.id.11297	C/G	G	-0.05751	0.02478	-2.3221	0.0202222	3250	rs2876520
5:103972357	genus.Collinsella.id.815	G/A	A	0.02942	0.01276	2.3218	0.0202545	14467	rs30266
4:42110353	genus.Gemella.id.1733	T/C	C	0.11804	0.05215	2.3216	0.0202653	1780	rs34937911
4:42110353	family.FamilyXI.id.1732	T/C	C	0.11804	0.05215	2.3216	0.0202653	1780	rs34937911
9:31124452	order.Actinomycetales.id.420	C/G	C	-0.03961	0.01709	-2.3207	0.0202976	7793	rs34653192
16:21639710	genus.unknowngenus.id.964	C/A	C	0.06474	0.0279	2.3201	0.0203409	2625	rs12923444
1:52342427	order.Pasteurellales.id.3688	T/C	C	-0.03147	0.01491	-2.3195	0.0203625	9495	rs1890946
1:52342427	family.Pasteurellaceae.id.3689	T/C	C	-0.03147	0.01491	-2.3195	0.0203625	9495	rs1890946
2:157111313	family.Comamonadaceae.id.2913	C/T	C	0.21738	0.09378	2.3198	0.0203625	354	rs1226412
9:2983774	genus.unknowngenus.id.2755	A/C	C	0.03595	0.01587	2.3191	0.020395	8499	rs1354115
7:12253880	genus.Dorea.id.1997	A/G	A	-0.02485	0.01079	-2.3188	0.0204059	17741	rs2043539
3:44736493	genus.Oscillospira.id.2064	T/C	C	0.17911	0.07819	2.3177	0.0204711	427	rs4346585
16:6315880	genus.Gordonibacter.id.821	A/G	G	0.05615	0.02421	2.3163	0.0205473	3794	rs7193263
11:30892824	genus.Prevotella2.id.11180	A/G	A	0.0701	0.03017	2.3161	0.0205583	2271	rs1448938
14:75130235	genus..Ruminococcustorquesgroup.id.14377	T/G	T	-0.02459	0.0106	-2.3159	0.0205583	17931	rs1045430
6:27835435	genus.Peptococcus.id.2037	A/G	G	0.06795	0.02933	2.3149	0.0206239	5514	rs200949
11:70544937	genus.RuminococcaceaeUCG002.id.11360	A/G	G	-0.02578	0.0109	-2.3144	0.0206348	17224	rs7117514
1:8489302	genus.Oscillospira.id.2064	T/C	C	0.03276	0.01429	2.3144	0.0206458	10243	rs301799
10:106610839	genus.Lachnoclostridium5.id.11312	A/G	A	-0.59407	0.2568	-2.3134	0.0206897	28	rs1021363
7:12253880	genus.Intestinimonas.id.2062	A/G	A	-0.03012	0.01305	-2.3127	0.0207336	12113	rs2043539
3:117509984	genus.Murimonas.id.14368	C/T	T	0.49696	0.21488	2.3127	0.0207446	48	rs6783233
9:36999369	genus.RuminococcaceaeV9D2013group.id.11372	C/T	T	0.15398	0.06654	2.312	0.0207777	469	rs7030813
14:75130235	family.Verrucomicrobiaceae.id.4036	T/G	T	-0.02937	0.01293	-2.3108	0.0208439	11998	rs1045430
1:175913828	genus.LachnospiraceaeUCG008.id.11328	T/C	T	0.03963	0.01735	2.31	0.0208882	7140	rs10913112
5:103972357	genus.Intestinibacter.id.11345	G/A	A	-0.03267	0.01364	-2.3098	0.0208882	12432	rs30266
14:75130235	class.Verrucomicrobiae.id.4029	T/G	T	-0.02936	0.01293	-2.3095	0.0209103	11998	rs1045430
14:75130235	order.Verrucomicrobiales.id.4030	T/G	T	-0.02936	0.01293	-2.3095	0.0209103	11998	rs1045430
5:103972357	genus.LachnospiraceaeAC2044group.id.11313	G/A	A	-0.23409	0.10139	-2.3087	0.0209547	198	rs30266
14:64697037	genus.Eggerthella.id.819	T/C	T	-0.04627	0.01983	-2.307	0.0210437	5203	rs1152578
11:30892824	genus.Yokenella.id.3532	A/G	A	-0.28805	0.12487	-2.3068	0.021066	124	rs1448938
6:105365891	genus.Serratia.id.3523	C/G	C	0.52843	0.2291	2.3065	0.0210883	33	rs1933802
6:27835435	genus.Parabacteroides.id.954	A/G	G	-0.03761	0.01676	-2.3057	0.0211218	16940	rs200949
4:123186393	genus.Slackia.id.825	A/G	G	-0.0985	0.04368	-2.3052	0.0211442	5002	rs45510091
2:58012833	genus..Eubacteriumruminantiumgroup.id.11340	C/T	T	-0.038	0.01644	-2.3042	0.0212114	7824	rs1568452
9:119731045	order.Campylobacterales.id.3272	T/G	G	0.10555	0.0449	2.3036	0.0212451	1199	rs10817969
7:82454404	family.Alcaligenaceae.id.2875	C/G	C	0.02536	0.01099	2.3029	0.0212901	16923	rs2247523
2:58012833	family.Thermoanaerobacteraceae.id.2126	C/T	T	0.07228	0.03147	2.3025	0.0213126	2140	rs1568452
7:82454404	genus.unknowngenus.id.2163	C/G	C	-0.06728	0.02906	-2.3024	0.0213126	2368	rs2247523
2:58012833	genus.Ruminococcus2.id.11374	C/T	T	0.02692	0.01171	2.3023	0.0213239	15472	rs1568452
22:41487218	genus.Romboutsia.id.11347	C/T	C	0.03067	0.01356	2.2995	0.0214822	13701	rs5995992
2:58012833	order.Thermoanaerobacterales.id.2112	C/T	T	0.07217	0.03146	2.2995	0.0214822	2141	rs1568452
9:119731045	class.Epsilonproteobacteria.id.3268	T/G	G	0.10515	0.04483	2.2984	0.021539	1203	rs10817969
18:52488672	class.Fusobacteriia.id.2204	C/T	T	-0.07949	0.03502	-2.2978	0.0215618	2326	rs62091461
18:52488672	phylum.Fusobacteria.id.2203	C/T	T	-0.07949	0.03502	-2.2978	0.0215618	2326	rs62091461
9:36999369	genus.unknowngenus.id.1000003999	C/T	T	0.06547	0.02874	2.2971	0.0216188	2589	rs7030813
12:23987925	genus.unknowngenus.id.2200	T/G	G	0.79509	0.34616	2.2969	0.0216302	31	rs78337797
12:23987925	genus.Finegoldia.id.1940	T/G	G	0.25929	0.11291	2.2966	0.0216416	348	rs78337797
5:103972357	genus.Actinomyces.id.423	G/A	A	-0.03963	0.01732	-2.2958	0.0216759	7594	rs30266
1:52342427	genus.Yokenella.id.3532	T/C	C	-0.28591	0.12456	-2.2954	0.0217102	124	rs1890946
14:64697037	genus.Ruminiclostridium.id.11353	T/C	T	-0.12147	0.05239	-2.2938	0.0217905	730	rs1152578
14:75130235	genus.Akkermansia.id.4037	T/G	T	-0.02915	0.01294	-2.2938	0.0217905	11997	rs1045430
12:121205078	family.Propionibacteriaceae.id.714	A/G	A	-0.26861	0.11715	-2.2929	0.021848	141	rs3213572
14:75130235	genus.Lelliottia.id.14638	T/G	T	0.80422	0.35074	2.2929	0.0218595	11	rs1045430
1:52342427	class.Actinobacteria.id.419	T/C	C	0.02457	0.0113	2.2929	0.0218595	16446	rs1890946
6:105365891	family.Thermoactinomycetaceae.id.1782	C/G	C	0.52472	0.22884	2.2929	0.0218595	34	rs1933802
20:44680853	family.FamilyXIII.id.1957	A/G	A	0.02894	0.01253	2.2922	0.0218941	16772	rs12624433
6:142996618	genus.Acetitomaculum.id.1989	C/G	G	-0.1814	0.07777	-2.2919	0.0219056	320	rs2876520
17:27363750	genus.Acidaminococcus.id.2167	G/A	A	-0.096	0.04536	-2.2916	0.0219287	2526	rs75581564
13:53647048	genus.unknowngenus.id.964	C/A	A	0.06717	0.02844	2.2909	0.021975	2641	rs1343605
9:120484009	genus.Victivallis.id.2256	A/G	G	0.06002	0.02563	2.2903	0.0220097	3377	rs913930
10:106610839	family.Marinilabiaceae.id.929	A/G	A	-0.44494	0.19432	-2.2897	0.0220329	53	rs1021363
13:53647048	genus.RuminococcaceaeV9D2013group.id.11372	C/A	A	0.1539	0.06708	2.2898	0.0220445	469	rs1343605
18:53099012	genus.RuminococcaceaeUCG004.id.11362	G/C	G	0.03608	0.01575	2.2896	0.0220445	9632	rs12967143
18:50731802	genus.Collinsella.id.815	G/A	A	0.02769	0.01209	2.2891	0.0220794	14034	rs7227069
9:31124452	family.Actinomycetaceae.id.421	C/G	C	-0.03906	0.01709	-2.2885	0.0221026	7792	rs34653192
14:64697037	genus.Acetitomaculum.id.1989	T/C	T	0.18213	0.07895	2.2878	0.0221492	320	rs1152578
5:93071630	genus.LachnospiraceaeND3007group.id.11317	G/C	C	0.03115	0.01402	2.2875	0.0221725	15438	rs10061069
10:106610839	genus.Clostridiumsensustricto19.id.1883	A/G	A	-0.5219	0.22821	-2.2869	0.0221958	37	rs1021363
10:106610839	genus..Eubacteriumtenuegroup.id.14380	A/G	A	-0.29978	0.1392	-2.2856	0.0222777	166	rs1021363
5:103972357	genus.Clostridiumsensustricto1.id.1873	G/A	A	-0.02914	0.01283	-2.2847	0.0223246	14249	rs30266
6:105365891	family.unknownfamily.id.1000006161	C/G	C	0.04565	0.01992	2.2837	0.022395	5106	rs1933802
6:105365891	genus.unknowngenus.id.1000006162	C/G	C	0.04565	0.01992	2.2837	0.022395	5106	rs1933802
3:49214066	class.Fusobacteriia.id.2204	A/G	G	0.08829	0.03713	2.2835	0.0224068	2099	rs13084037
3:49214066	phylum.Fusobacteria.id.2203	A/G	G	0.08829	0.03713	2.2835	0.0224068	2099	rs13084037
5:164523472	genus..Eubacteriumruminantiumgroup.id.11340	C/A	A	0.0379	0.01635	2.2836	0.0224068	7819	rs11135349
7:82454404	genus.Hydrogenoanaerobacterium.id.2060	C/G	C	0.0831	0.03639	2.2834	0.0224186	1514	rs2247523
7:82454404	genus.Parasutterella.id.2892	C/G	C	0.03009	0.01335	2.2831	0.0224304	11439	rs2247523
9:23737627	genus.Turicibacter.id.2162	A/G	A	-0.03403	0.0149	-2.2828	0.0224422	9080	rs3793577
1:197704717	genus.Anaerovirgula.id.1902	C/T	T	0.54113	0.23713	2.282	0.0224893	53	rs17641524
22:41487218	genus.Corynebacterium.id.449	C/T	C	0.25144	0.10941	2.2818	0.0225012	221	rs5995992
3:157977962	phylum.Synergistetes.id.3898	C/T	C	0.10761	0.04578	2.2818	0.0225012	962	rs1095626
3:157977962	order.Synergistales.id.3900	C/T	C	0.10761	0.04578	2.2818	0.0225012	962	rs1095626
3:157977962	family.Synergistaceae.id.3901	C/T	C	0.10761	0.04578	2.2818	0.0225012	962	rs1095626
3:157977962	class.Synergistia.id.3899	C/T	C	0.10761	0.04578	2.2818	0.0225012	962	rs1095626
11:70544937	family.FamilyXI.id.1732	A/G	G	0.07748	0.03367	2.2817	0.022513	1779	rs7117514
11:70544937	genus.Gemella.id.1733	A/G	G	0.07748	0.03367	2.2817	0.022513	1779	rs7117514
14:75130235	genus.Acinetobacter.id.3711	T/G	T	0.14561	0.06299	2.2811	0.0225485	492	rs1045430
9:126634255	genus.Campylobacter.id.3275	C/T	C	-0.12569	0.0547	-2.2802	0.0225958	838	rs2670139
20:39997404	genus.Turicibacter.id.2162	G/T	T	0.32322	0.14012	2.2797	0.0226314	250	rs143186028
16:13755530	genus.Shuttleworthia.id.2013	A/G	G	0.55741	0.24453	2.2795	0.0226433	36	rs56887639
11:88744425	genus.Sporobacterium.id.2014	C/T	T	-0.39489	0.17334	-2.2781	0.0227147	62	rs7932640
2:22503044	genus.Ruminiclostridium.id.11353	T/A	A	0.12094	0.05182	2.2779	0.0227385	730	rs12052908
11:30892824	genus.Acetanaerobacterium.id.2051	A/G	A	-0.10185	0.04467	-2.277	0.0227743	1021	rs1448938
2:208044470	family.Halomonadaceae.id.3610	A/G	A	-0.14544	0.06357	-2.2762	0.0228221	551	rs62188629
2:58012833	family.Victivallaceae.id.2255	C/T	T	-0.05222	0.02286	-2.2761	0.022834	4028	rs1568452
14:75130235	genus.Staphylococcus.id.1780	T/G	T	0.16943	0.0754	2.2753	0.0228939	341	rs1045430
11:30892824	genus.Burkholderia.Paraburkholderia.id.14563	A/G	A	0.14854	0.06524	2.2752	0.0229059	478	rs1448938
9:120484009	genus.Serratia.id.3523	A/G	G	0.546	0.24	2.275	0.0229059	33	rs913930
18:52488672	genus.Phascolarctobacterium.id.2168	C/T	T	-0.03581	0.01583	-2.2742	0.022954	11237	rs62091461
9:119731045	family.Clostridiaceae2.id.1900	T/G	G	0.4844	0.21306	2.2735	0.0230021	54	rs10817969
17:27363750	genus.Burkholderia.Paraburkholderia.id.14563	G/A	A	-0.22818	0.10061	-2.2731	0.0230141	478	rs75581564
1:72765116	class.Opitutae.id.3988	G/A	G	-0.08312	0.0363	-2.2719	0.0230865	1636	rs2568958
16:13755530	phylum.Tenericutes.id.3919	A/G	G	0.03206	0.01479	2.2709	0.0231591	11483	rs56887639
16:13755530	class.Mollicutes.id.3920	A/G	G	0.03206	0.01479	2.2709	0.0231591	11483	rs56887639
6:101387304	genus.DefluviitaleaceaeUCG011.id.11287	T/A	A	0.0361	0.01597	2.2709	0.0231591	8219	rs7758630
1:8489302	genus.Ruminiclostridium9.id.11357	T/C	C	-0.02635	0.01113	-2.2703	0.0231833	16843	rs301799
8:65562019	genus.Sporobacterium.id.2014	T/G	T	0.56791	0.25019	2.2699	0.0232197	62	rs7837935
9:120484009	genus.Sporobacterium.id.2014	A/G	G	0.40318	0.17762	2.2699	0.0232197	62	rs913930
11:61471678	genus..Eubacteriumoxidoreducensgroup.id.11339	C/T	T	0.05572	0.0259	2.2694	0.023244	5348	rs198457
18:35138245	genus.ErysipelotrichaceaeUCG003.id.11384	G/A	A	-0.02865	0.01222	-2.2689	0.0232683	15027	rs12967855
14:64697037	genus.Victivallis.id.2256	T/C	T	0.05683	0.02458	2.2684	0.023317	3377	rs1152578
16:6315880	genus.Bifidobacterium.id.436	A/G	G	-0.02812	0.01223	-2.2673	0.0233658	14908	rs7193263
1:50559162	genus.Lactobacillus.id.1837	A/G	G	-0.06337	0.02829	-2.2655	0.0234759	6599	rs11579246
11:57650796	genus.Eubacterium.id.1932	C/T	T	0.21988	0.09816	2.2649	0.023525	261	rs2509805
13:66941792	genus.Flavonifractor.id.2059	A/G	G	-0.03101	0.01363	-2.2646	0.023525	10852	rs9592461
2:157111313	genus.Anaerosporobacter.id.1990	C/T	C	-0.35779	0.15798	-2.2648	0.023525	91	rs1226412
10:106610839	genus.Oscillibacter.id.2063	A/G	A	0.03496	0.01592	2.2641	0.0235741	8969	rs1021363
12:23987925	genus.Alistipes.id.968	T/G	G	-0.03768	0.017	-2.264	0.0235741	16806	rs78337797
7:82936909	family.Campylobacteraceae.id.3273	C/T	T	-0.11411	0.04837	-2.2631	0.0236234	862	rs16887442
3:117509984	order.Pasteurellales.id.3688	C/T	T	-0.03883	0.01697	-2.262	0.0236974	8952	rs6783233
3:117509984	family.Pasteurellaceae.id.3689	C/T	T	-0.03883	0.01697	-2.262	0.0236974	8952	rs6783233
2:58012833	genus.Faecalibacterium.id.2057	C/T	T	0.02447	0.0108	2.2615	0.0237345	18220	rs1568452
7:82454404	order.Burkholderiales.id.2874	C/G	C	0.02501	0.0109	2.2612	0.0237469	17221	rs2247523
13:99115041	genus.CandidatusSoleaferrea.id.11350	T/C	T	-0.04256	0.01854	-2.2609	0.0237593	6203	rs4772087
10:1795194	genus.Epulopiscium.id.1998	C/T	T	-0.6343	0.28064	-2.2602	0.0238088	21	rs997934
11:88744425	genus.Gelria.id.2134	C/T	T	-0.07089	0.03138	-2.2598	0.0238212	2047	rs7932640
12:23987925	order.Pseudomonadales.id.3709	T/G	G	0.14357	0.06236	2.26	0.0238337	1382	rs78337797
15:47684936	genus.RuminococcaceaeV9D2013group.id.11372	T/C	C	0.17653	0.07819	2.2592	0.0238834	469	rs34488670
11:57650796	genus.ErysipelotrichaceaeUCG004.id.11385	C/T	T	0.19137	0.08671	2.2582	0.0239332	335	rs2509805
7:82454404	genus.RuminococcaceaeUCG010.id.11367	C/G	C	0.0276	0.0125	2.2578	0.0239706	12999	rs2247523
2:58012833	family.Planococcaceae.id.1753	C/T	T	0.57783	0.25608	2.2564	0.0240456	29	rs1568452
2:208044470	genus.LachnospiraceaeUCG009.id.11329	A/G	A	0.39359	0.17454	2.255	0.0241459	74	rs62188629
18:53099012	genus.RuminococcaceaeUCG007.id.11364	G/C	G	0.06537	0.02855	2.2536	0.0242213	2915	rs12967143
14:64697037	genus.Odoribacter.id.952	T/C	T	0.02657	0.01175	2.2535	0.0242339	14823	rs1152578
16:21639710	genus.Blautia.id.1992	C/A	C	-0.02382	0.0106	-2.253	0.0242592	18295	rs12923444
9:126634255	genus.Granulicatella.id.1821	C/T	C	0.0736	0.03288	2.251	0.0243855	2352	rs2670139
15:37643831	genus.Catabacter.id.11282	C/T	C	-0.10722	0.04705	-2.2507	0.0243982	922	rs8037355
7:82936909	genus.unknowngenus.id.3624	C/T	T	0.2116	0.09402	2.2504	0.0244362	229	rs16887442
1:50559162	genus.Catenibacterium.id.2153	A/G	G	-0.09409	0.04119	-2.2497	0.0244616	3039	rs11579246
3:117509984	genus.LachnospiraceaeND3007group.id.11317	C/T	T	-0.02937	0.01321	-2.2495	0.0244743	14746	rs6783233
16:13066833	genus.Ezakiella.id.11289	C/T	T	-0.10284	0.04693	-2.2471	0.0246272	1215	rs7200826
13:66941792	genus.CandidatusSaccharimonas.id.11573	A/G	G	-0.60199	0.26795	-2.2466	0.0246528	23	rs9592461
11:70544937	family.FamilyXIII.id.1957	A/G	G	-0.02489	0.011	-2.2458	0.024704	16864	rs7117514
1:52342427	genus.Propionibacterium.id.727	T/C	C	0.26991	0.12017	2.2461	0.024704	134	rs1890946
20:39997404	order.Victivallales.id.2254	G/T	T	-0.24747	0.10883	-2.246	0.024704	417	rs143186028
20:39997404	class.Lentisphaeria.id.2250	G/T	T	-0.24747	0.10883	-2.246	0.024704	417	rs143186028
10:106610839	genus.Biostraticola.id.3471	A/G	A	-0.18388	0.0907	-2.245	0.0247553	387	rs1021363
1:67146817	genus.Sporobacterium.id.2014	T/C	C	0.39585	0.17631	2.2452	0.0247553	62	rs10789214
1:181740924	genus.Ruminococcus1.id.11373	G/A	G	-0.02885	0.01294	-2.245	0.0247681	16048	rs169235
1:72765116	phylum.Bacteroidetes.id.905	G/A	G	0.02509	0.01089	2.2443	0.0248195	18468	rs2568958
9:23737627	genus.Prevotella6.id.11181	A/G	A	0.15639	0.06937	2.2438	0.0248581	408	rs3793577
6:105365891	genus..Clostridiuminnocuumgroup.id.14397	C/G	C	0.04916	0.02187	2.2431	0.0248968	4252	rs1933802
11:57650796	genus.RuminococcaceaeUCG007.id.11364	C/T	T	-0.06365	0.02826	-2.2424	0.0249355	2915	rs2509805
3:157977962	genus.Holdemania.id.2157	C/T	C	-0.0334	0.01494	-2.2413	0.0250002	9193	rs1095626
2:58012833	genus.Megamonas.id.2184	C/T	T	-0.10107	0.04505	-2.241	0.0250131	1016	rs1568452
4:123186393	genus.unknowngenus.id.826	A/G	G	0.07016	0.03091	2.2413	0.0250131	9971	rs45510091
4:42110353	genus.unknowngenus.id.1000006162	T/C	C	-0.07027	0.03123	-2.2408	0.0250261	5104	rs34937911
4:42110353	family.unknownfamily.id.1000006161	T/C	C	-0.07027	0.03123	-2.2408	0.0250261	5104	rs34937911
20:44680853	family.Carnobacteriaceae.id.1811	A/G	A	-0.0713	0.03181	-2.2407	0.025039	2573	rs12624433
11:65314830	genus.Atopobium.id.814	A/T	T	-0.13352	0.06038	-2.2399	0.0250909	826	rs58621819
12:23987925	genus.Papillibacter.id.2065	T/G	G	-0.14045	0.06352	-2.2397	0.0251039	1122	rs78337797
1:72765116	family.Succinivibrionaceae.id.3326	G/A	G	0.23636	0.10553	2.2397	0.0251169	229	rs2568958
1:72765116	order.Bacteroidales.id.913	G/A	G	0.02502	0.01089	2.2383	0.025208	18467	rs2568958
1:72765116	class.Bacteroidia.id.912	G/A	G	0.02502	0.01089	2.2383	0.025208	18467	rs2568958
2:208044470	genus.Acetitomaculum.id.1989	A/G	A	-0.18677	0.08291	-2.2381	0.025208	320	rs62188629
2:22503044	genus.Roseburia.id.2012	T/A	A	-0.02386	0.01058	-2.2376	0.0252341	17986	rs12052908
11:113370758	genus.Succiniclasticum.id.2169	A/G	A	0.47342	0.21157	2.2377	0.0252471	43	rs61902811
7:82454404	genus.Mannheimia.id.3701	C/G	C	-0.51358	0.22955	-2.2374	0.0252471	33	rs2247523
8:65562019	genus.Atopobium.id.814	T/G	T	0.15937	0.07027	2.2375	0.0252602	826	rs7837935
12:84465022	genus.LachnospiraceaeNK4B4group.id.11320	G/T	G	0.0899	0.03952	2.2365	0.0253256	1732	rs56314503
13:66941792	genus.Ruminiclostridium5.id.11355	A/G	G	-0.02399	0.01072	-2.2361	0.0253387	17530	rs9592461
9:23737627	family.Corynebacteriaceae.id.448	A/G	A	0.10952	0.04908	2.2363	0.0253387	828	rs3793577
11:61471678	genus.Butyricicoccus.id.2055	C/T	T	-0.03241	0.01436	-2.2355	0.025378	17020	rs198457
17:27363750	genus.Catabacter.id.11282	G/A	A	0.17934	0.07725	2.2357	0.025378	828	rs75581564
18:53099012	family.Carnobacteriaceae.id.1811	G/C	G	-0.06842	0.03012	-2.2346	0.0254305	2591	rs12967143
2:22503044	genus.Shuttleworthia.id.2013	T/A	A	0.49351	0.2209	2.2341	0.0254831	36	rs12052908
10:106610839	genus.unknowngenus.id.1000003999	A/G	A	0.06622	0.02998	2.2339	0.0254962	2589	rs1021363
1:73668836	family.Halomonadaceae.id.3610	A/G	A	0.13405	0.05998	2.2331	0.0255489	551	rs10890020
6:101387304	family.Defluviitaleaceae.id.1924	T/A	A	0.03547	0.01595	2.233	0.0255489	8239	rs7758630
4:123186393	family.Corynebacteriaceae.id.448	A/G	G	0.28559	0.12713	2.2327	0.0255753	612	rs45510091
9:23737627	order.Burkholderiales.id.2874	A/G	A	-0.02414	0.01083	-2.2316	0.0256414	17223	rs3793577
18:52488672	genus.Lachnoclostridium5.id.11312	C/T	T	0.68134	0.3054	2.231	0.0256811	28	rs62091461
6:105365891	genus.Salinithrix.id.14356	C/G	C	0.51912	0.23267	2.2312	0.0256811	33	rs1933802
1:73668836	genus.unknowngenus.id.1854	A/G	A	0.19025	0.08464	2.2291	0.0258139	273	rs10890020
6:66565703	genus.unknowngenus.id.1000013899	T/C	C	0.36619	0.16333	2.2286	0.0258539	81	rs9363467
6:66565703	family.unknownfamily.id.987	T/C	C	0.36619	0.16333	2.2286	0.0258539	81	rs9363467
13:66941792	order.Propionibacteriales.id.704	A/G	G	-0.25759	0.11563	-2.2277	0.0258938	145	rs9592461
18:50731802	genus.Tyzzerella4.id.11336	G/A	A	-0.08255	0.03631	-2.2275	0.0259072	1578	rs7227069
1:197704717	family.P5D1.392.id.1847	C/T	T	0.41217	0.18517	2.2259	0.0260276	97	rs17641524
1:197704717	genus.unknowngenus.id.1000040046	C/T	T	0.41217	0.18517	2.2259	0.0260276	97	rs17641524
9:126634255	genus.Ruminiclostridium6.id.11356	C/T	C	0.0309	0.0137	2.2258	0.0260276	13507	rs2670139
14:60141822	family.Comamonadaceae.id.2913	T/G	G	-0.19696	0.0853	-2.2253	0.0260544	354	rs1956373
9:126634255	genus.Megamonas.id.2184	C/T	C	0.10988	0.0521	2.2255	0.0260544	1014	rs2670139
14:104017953	genus.Oscillospira.id.2064	A/G	A	0.03172	0.01422	2.2251	0.0260812	9885	rs10149470
1:67146817	genus.Enterorhabdus.id.820	T/C	C	-0.03554	0.01658	-2.2236	0.0261754	7551	rs10789214
11:30892824	genus.Clostridiumsensustricto1.id.1873	A/G	A	-0.02677	0.01201	-2.2232	0.0262023	14253	rs1448938
20:44680853	genus.Sellimonas.id.14369	A/G	A	0.06509	0.02866	2.2233	0.0262023	3185	rs12624433
6:27835435	genus.LachnospiraceaeUCG001.id.11321	A/G	G	0.0492	0.02182	2.2233	0.0262023	9969	rs200949
11:61471678	family.Thermoactinomycetaceae.id.1782	C/T	T	0.63319	0.28482	2.2231	0.0262158	34	rs198457
4:42110353	family.Nocardiaceae.id.460	T/C	C	1.04156	0.46879	2.2218	0.0262968	16	rs34937911
4:42110353	genus.Rhodococcus.id.464	T/C	C	1.04156	0.46879	2.2218	0.0262968	16	rs34937911
2:58012833	genus.RuminococcaceaeUCG009.id.11366	C/T	T	0.03708	0.01672	2.2216	0.0263103	7565	rs1568452
6:66565703	genus.Escherichia.Shigella.id.3504	T/C	C	-0.21818	0.09853	-2.2215	0.0263103	230	rs9363467
12:84465022	genus.Slackia.id.825	G/T	G	-0.04717	0.02125	-2.2211	0.0263374	6088	rs56314503
10:106610839	genus.Alkalitalea.id.931	A/G	A	-0.44435	0.2001	-2.2207	0.0263645	50	rs1021363
15:47684936	genus.unknowngenus.id.959	T/C	C	-0.05846	0.02593	-2.22	0.0264052	4321	rs34488670
12:23987925	genus.Blautia.id.1992	T/G	G	-0.03662	0.01675	-2.2191	0.0264731	17465	rs78337797
2:208044470	genus.Biostraticola.id.3471	A/G	A	0.22225	0.09333	2.2194	0.0264731	387	rs62188629
7:82454404	class.Betaproteobacteria.id.2867	C/G	C	0.0244	0.01088	2.219	0.0264867	17275	rs2247523
14:60141822	genus.Asaccharospora.id.11344	T/G	G	-0.5199	0.23453	-2.2168	0.0266368	43	rs1956373
14:60141822	family.Thermoactinomycetaceae.id.1782	T/G	G	0.5769	0.26024	2.2168	0.0266504	34	rs1956373
18:50731802	genus.Actinomyces.id.423	G/A	A	0.03644	0.01651	2.2151	0.0267601	7427	rs7227069
18:50731802	genus.Eggerthella.id.819	G/A	A	0.04479	0.02021	2.2152	0.0267601	4962	rs7227069
1:80809636	genus..Eubacteriumfissicatenagroup.id.14373	G/A	A	0.05371	0.02605	2.2146	0.0267875	3877	rs113188507
20:39997404	family.Victivallaceae.id.2255	G/T	T	-0.25182	0.11283	-2.2142	0.026815	388	rs143186028
5:164523472	genus.CoriobacteriaceaeUCG002.id.11158	C/A	A	-0.17203	0.07707	-2.2139	0.0268288	334	rs11135349
14:60141822	genus.Isobaculum.id.1822	T/G	G	-0.62649	0.28303	-2.2135	0.0268563	28	rs1956373
9:23737627	family.Lachnospiraceae.id.1987	A/G	A	0.02317	0.01045	2.2138	0.0268563	18473	rs3793577
1:197704717	class.Opitutae.id.3988	C/T	T	-0.09676	0.04495	-2.2132	0.0268701	1636	rs17641524
2:208044470	genus.LachnospiraceaeFCS020group.id.11314	A/G	A	-0.02856	0.01299	-2.2133	0.0268701	13902	rs62188629
14:60141822	genus.Salinithrix.id.14356	T/G	G	0.58345	0.26372	2.2124	0.026939	33	rs1956373
1:181740924	genus.Parabacteroides.id.954	G/A	G	0.0277	0.0127	2.2125	0.026939	16641	rs169235
1:67146817	genus.Parvibacter.id.824	T/C	C	0.51882	0.23451	2.2124	0.026939	33	rs10789214
11:30892824	genus..Eubacteriumeligensgroup.id.14372	A/G	A	-0.02596	0.01176	-2.2122	0.0269529	14886	rs1448938
14:75130235	genus.Samsonia.id.14644	T/G	T	-0.31042	0.14037	-2.2115	0.0269943	102	rs1045430
16:7666402	genus.Romboutsia.id.11347	C/T	C	-0.0269	0.01226	-2.2112	0.0270082	14319	rs7198928
2:208044470	genus.Caproiciproducens.id.14382	A/G	A	-0.11176	0.05103	-2.2104	0.0270635	964	rs62188629
6:27835435	genus.Negativicoccus.id.2187	A/G	G	1.24759	0.56452	2.21	0.0271052	9	rs200949
14:75130235	family.Moraxellaceae.id.3710	T/G	T	0.12732	0.05629	2.2099	0.027119	616	rs1045430
1:73668836	genus..Eubacteriumrectalegroup.id.14374	A/G	A	-0.02341	0.01078	-2.2091	0.0271607	17483	rs10890020
1:80809636	genus.Ruminiclostridium9.id.11357	G/A	A	-0.02743	0.01256	-2.2084	0.0272164	16845	rs113188507
7:109099919	genus.CoriobacteriaceaeUCG002.id.11158	A/G	G	0.17188	0.07674	2.2082	0.0272443	334	rs58104186
10:1795194	genus.CandidatusSoleaferrea.id.11350	C/T	T	-0.04054	0.01842	-2.2063	0.027356	6203	rs997934
2:86819128	genus.Oscillospira.id.2064	T/C	C	0.0432	0.01946	2.2064	0.027356	9803	rs7585722
18:77580712	genus.Mitsuokella.id.2186	G/A	A	0.10639	0.05076	2.2063	0.02737	1353	rs7241572
18:50731802	genus.Alkalitalea.id.931	G/A	A	-0.4216	0.19113	-2.2058	0.027398	50	rs7227069
1:197704717	genus.Mitsuokella.id.2186	C/T	T	-0.10178	0.04876	-2.2058	0.027398	1452	rs17641524
14:64697037	genus.Anaerosporobacter.id.1990	T/C	T	-0.32783	0.14863	-2.2056	0.027412	92	rs1152578
16:6315880	genus.Pseudoflavonifractor.id.2066	A/G	G	0.06756	0.03038	2.2058	0.027412	2395	rs7193263
7:117502574	genus.unknowngenus.id.1000040046	T/C	C	0.32843	0.1489	2.2057	0.027412	97	rs7807677
7:117502574	family.P5D1.392.id.1847	T/C	C	0.32843	0.1489	2.2057	0.027412	97	rs7807677
16:13755530	genus.Faecalibacterium.id.2057	A/G	G	0.02518	0.01178	2.2052	0.0274541	18220	rs56887639
18:35138245	genus.Tyzzerella.id.11334	G/A	A	-0.06543	0.02889	-2.2048	0.0274681	2698	rs12967855
5:103972357	genus.Prevotella7.id.11182	G/A	A	-0.05413	0.02526	-2.2037	0.0275384	3609	rs30266
11:61471678	genus.Eubacterium.id.1932	C/T	T	-0.28693	0.12994	-2.2033	0.0275666	193	rs198457
12:121205078	order.Propionibacteriales.id.704	A/G	A	-0.25498	0.11573	-2.2032	0.0275807	145	rs3213572
2:208044470	order.Oceanospirillales.id.3593	A/G	A	-0.14049	0.06348	-2.2028	0.0275948	553	rs62188629
11:61471678	genus.Succiniclasticum.id.2169	C/T	T	0.58554	0.26581	2.2029	0.0276089	43	rs198457
16:13755530	genus.Butyrivibrio.id.1993	A/G	G	0.05772	0.02645	2.2026	0.027623	3516	rs56887639
12:23987925	family.16d63.751.id.1801	T/G	G	0.18879	0.08479	2.2025	0.0276371	689	rs78337797
12:23987925	genus.unknowngenus.id.1000071828	T/G	G	0.18879	0.08479	2.2025	0.0276371	689	rs78337797
9:23737627	genus.Roseburia.id.2012	A/G	A	0.02344	0.0106	2.2011	0.027736	17987	rs3793577
9:31124452	genus.Parasporobacterium.id.2009	C/G	C	-0.12825	0.06652	-2.201	0.027736	628	rs34653192
7:12253880	genus.Burkholderia.Paraburkholderia.id.14563	A/G	A	0.14445	0.06566	2.2	0.0278211	478	rs2043539
2:157111313	genus.Parasutterella.id.2892	C/T	C	-0.03424	0.01622	-2.1995	0.0278353	11436	rs1226412
20:39997404	genus.Klebsiella.id.3507	G/T	T	0.91828	0.41755	2.1992	0.0278779	31	rs143186028
13:66941792	genus.FamilyXIIIUCG002.id.11295	A/G	G	0.31438	0.14303	2.1981	0.0279491	93	rs9592461
14:42074726	family.Corynebacteriaceae.id.448	A/G	G	-0.10788	0.04881	-2.1977	0.0279634	828	rs61990288
18:52488672	genus.Pseudoflavonifractor.id.2066	C/T	T	-0.07842	0.03444	-2.1977	0.0279634	2395	rs62091461
16:6315880	genus.ChristensenellaceaeR.7group.id.11283	A/G	G	0.02585	0.01164	2.1965	0.0280633	16449	rs7193263
22:41487218	genus.Asaccharospora.id.11344	C/T	C	0.50862	0.23162	2.1959	0.0281063	43	rs5995992
9:36999369	genus.Turicibacter.id.2162	C/T	T	0.03371	0.0153	2.1957	0.0281206	9076	rs7030813
6:105365891	order.Pasteurellales.id.3688	C/G	C	-0.03272	0.01469	-2.1952	0.0281349	9494	rs1933802
6:105365891	family.Pasteurellaceae.id.3689	C/G	C	-0.03272	0.01469	-2.1952	0.0281349	9494	rs1933802
9:31124452	class.Flavobacteriia.id.1089	C/G	C	-0.21889	0.09738	-2.1944	0.0281923	226	rs34653192
7:12253880	family.Leptotrichiaceae.id.2215	A/G	A	-0.32548	0.14833	-2.1943	0.0282067	88	rs2043539
2:22503044	genus.RuminococcaceaeUCG004.id.11362	T/A	A	0.03156	0.01444	2.1942	0.028221	9635	rs12052908
11:113370758	genus.Fulvitalea.id.13905	A/G	A	-0.39583	0.18044	-2.1937	0.0282498	61	rs61902811
11:113370758	family.Flammeovirgaceae.id.1035	A/G	A	-0.39583	0.18044	-2.1937	0.0282498	61	rs61902811
1:37192741	genus.Prevotella2.id.11180	T/C	C	0.06803	0.03164	2.1927	0.0283362	2271	rs1002656
6:105365891	genus.Acetanaerobacterium.id.2051	C/G	C	0.09714	0.04418	2.1923	0.0283651	1021	rs1933802
7:12253880	genus.Megasphaera.id.2185	A/G	A	0.07243	0.0326	2.1918	0.028394	1933	rs2043539
15:47684936	genus.Parabacteroides.id.954	T/C	C	0.0293	0.01332	2.1918	0.0284084	16639	rs34488670
11:65314830	family.FamilyXIII.id.1957	A/T	T	0.03072	0.01374	2.1909	0.0284663	16869	rs58621819
6:105365891	genus.Haemophilus.id.3698	C/G	C	-0.03301	0.01492	-2.1896	0.0285387	9201	rs1933802
20:39997404	class.Actinobacteria.id.419	G/T	T	0.34843	0.14728	2.1894	0.0285823	240	rs143186028
2:157111313	genus.Flavonifractor.id.2059	C/T	C	-0.03755	0.01662	-2.1889	0.0285968	10849	rs1226412
1:52342427	genus.Catabacter.id.11282	T/C	C	0.11726	0.04831	2.189	0.0286114	922	rs1890946
9:126634255	genus.unknowngenus.id.1000013899	C/T	C	-0.07288	0.03305	-2.1877	0.0286842	2278	rs2670139
9:126634255	family.unknownfamily.id.987	C/T	C	-0.07288	0.03305	-2.1877	0.0286842	2278	rs2670139
16:21639710	genus.Propionibacterium.id.727	C/A	C	-0.26309	0.12029	-2.1871	0.0287279	134	rs12923444
18:52488672	genus.Olsenella.id.822	C/T	T	0.05944	0.02735	2.1868	0.0287571	3797	rs62091461
1:8489302	genus.LachnospiraceaeND3007group.id.11317	T/C	C	-0.02465	0.01164	-2.1863	0.0287863	15437	rs301799
2:208044470	genus.Anaerostipes.id.1991	A/G	A	-0.02491	0.01181	-2.1859	0.0288156	17053	rs62188629
4:123186393	family.Alcaligenaceae.id.2875	A/G	G	-0.06365	0.02892	-2.185	0.0288742	11452	rs45510091
1:175913828	genus.Acinetobacter.id.3711	T/C	T	0.14641	0.06557	2.1845	0.0289329	492	rs10913112
14:60141822	genus.Tyzzerella.id.11334	T/G	G	-0.06612	0.03081	-2.1832	0.0290064	2701	rs1956373
4:3207142	genus.Atopobium.id.814	A/G	G	0.10972	0.04939	2.1834	0.0290211	826	rs7685686
7:82936909	genus.Hespellia.id.1999	C/T	T	-0.22612	0.10358	-2.183	0.0290211	191	rs16887442
9:126634255	genus.Lactococcus.id.1851	C/T	C	0.05317	0.02473	2.1829	0.0290505	4168	rs2670139
3:117509984	family.Rikenellaceae.id.967	C/T	T	-0.02647	0.01227	-2.1825	0.0290653	17036	rs6783233
14:64697037	genus.possiblegenusSk018.id.2019	T/C	T	0.36305	0.16636	2.1823	0.0290948	70	rs1152578
2:22503044	genus.Pseudoflavonifractor.id.2066	T/A	A	-0.06407	0.02877	-2.182	0.0290948	2395	rs12052908
9:31124452	genus.Pseudocitrobacter.id.14642	C/G	C	-0.11877	0.05405	-2.182	0.0290948	764	rs34653192
9:23737627	order.Corynebacteriales.id.447	A/G	A	0.10299	0.04731	2.1806	0.029213	894	rs3793577
9:36999369	genus..Eubacteriumfissicatenagroup.id.14373	C/T	T	-0.05093	0.02359	-2.1803	0.0292278	3873	rs7030813
5:164523472	genus..Eubacteriumxylanophilumgroup.id.14375	C/A	A	0.02675	0.01238	2.18	0.0292575	13412	rs11135349
9:23737627	family.Alcaligenaceae.id.2875	A/G	A	-0.02381	0.01092	-2.1794	0.0292871	16925	rs3793577
3:117509984	genus.Ruminiclostridium9.id.11357	C/T	T	-0.02671	0.0126	-2.1782	0.0293912	16151	rs6783233
4:3207142	genus.FamilyXIIIUCG002.id.11295	A/G	G	0.31715	0.14559	2.1783	0.0293912	93	rs7685686
9:126634255	genus.unknowngenus.id.964	C/T	C	0.06873	0.0309	2.1778	0.0294209	2639	rs2670139
9:126634255	genus.Fulvitalea.id.13905	C/T	C	0.45165	0.20743	2.1774	0.0294507	61	rs2670139
9:126634255	family.Flammeovirgaceae.id.1035	C/T	C	0.45165	0.20743	2.1774	0.0294507	61	rs2670139
2:58012833	family.Fusobacteriaceae.id.2208	C/T	T	-0.07996	0.03583	-2.1772	0.0294656	1636	rs1568452
7:2110346	genus.Diaphorobacter.id.2928	T/C	C	-0.34553	0.15871	-2.1771	0.0294656	114	rs3823624
1:80809636	family.Fusobacteriaceae.id.2208	G/A	A	-0.09191	0.04218	-2.1767	0.0294955	1636	rs113188507
5:103972357	genus.Prevotella.id.963	G/A	A	-0.06732	0.03081	-2.1767	0.0294955	2438	rs30266
1:50559162	phylum.Lentisphaerae.id.2238	A/G	G	-0.07086	0.0338	-2.1764	0.0295104	4739	rs11579246
1:8489302	genus..Eubacteriumrectalegroup.id.14374	T/C	C	-0.02341	0.01094	-2.1752	0.0296001	17482	rs301799
9:126634255	class.Cytophagia.id.989	C/T	C	0.4411	0.20287	2.1743	0.0296901	64	rs2670139
9:126634255	order.Cytophagales.id.990	C/T	C	0.4411	0.20287	2.1743	0.0296901	64	rs2670139
1:175913828	genus.Hungatella.id.11306	T/C	T	-0.04938	0.02241	-2.1735	0.0297352	4279	rs10913112
4:3207142	genus.unknowngenus.id.3624	A/G	G	0.20356	0.09363	2.1728	0.0297954	229	rs7685686
16:6315880	family.Peptococcaceae.id.2024	A/G	G	0.03095	0.01439	2.1726	0.0298255	10785	rs7193263
2:86819128	class.Flavobacteriia.id.1089	T/C	C	0.2663	0.12275	2.1723	0.0298406	226	rs7585722
4:42110353	genus.Staphylococcus.id.1780	T/C	C	-0.26459	0.12002	-2.1713	0.0299009	332	rs34937911
9:23737627	genus.Prevotella7.id.11182	A/G	A	-0.05176	0.02352	-2.1711	0.0299161	3611	rs3793577
1:197704717	family.Ruminococcaceae.id.2050	C/T	T	0.02863	0.01354	2.1705	0.0299766	18468	rs17641524
3:117509984	genus.Corynebacterium.id.449	C/T	T	0.23479	0.10815	2.17	0.0300069	221	rs6783233
7:12253880	genus.Ruminiclostridium1.id.11354	A/G	A	0.07696	0.03477	2.1691	0.0300827	1690	rs2043539
6:142996618	family.Corynebacteriaceae.id.448	C/G	G	-0.10736	0.04879	-2.1687	0.0300979	828	rs2876520
5:164523472	genus.Catenibacterium.id.2153	C/A	A	-0.05451	0.02516	-2.1683	0.0301283	3350	rs11135349
6:105365891	genus.Intestinibacter.id.11345	C/G	C	-0.0275	0.0128	-2.1682	0.0301283	12435	rs1933802
18:52488672	genus.Coprococcus2.id.11302	C/T	T	0.03315	0.01559	2.1683	0.0301435	11616	rs62091461
3:157977962	family.Peptostreptococcaceae.id.2042	C/T	C	0.02426	0.01125	2.1684	0.0301435	16194	rs1095626
9:126634255	family.Lactobacillaceae.id.1836	C/T	C	0.0412	0.01889	2.1683	0.0301435	7188	rs2670139
18:50731802	genus.unknowngenus.id.959	G/A	A	-0.04693	0.02172	-2.168	0.0301587	4324	rs7227069
18:53099012	genus.unknowngenus.id.441	G/C	G	0.08226	0.03799	2.1673	0.0302196	1628	rs12967143
9:120484009	genus.Isobaculum.id.1822	A/G	G	0.55159	0.25455	2.1669	0.0302501	28	rs913930
1:181740924	genus.Lachnoclostridium.id.11308	G/A	G	0.02704	0.01248	2.1667	0.0302654	17244	rs169235
10:106610839	genus..Bacteroidespectinophilusgroup.id.14371	A/G	A	0.7216	0.3331	2.1663	0.0302959	15	rs1021363
1:197704717	phylum.Verrucomicrobia.id.3982	C/T	T	-0.03556	0.01633	-2.1656	0.0303265	12516	rs17641524
9:23737627	genus.possiblegenusSk018.id.2019	A/G	A	0.35877	0.16571	2.165	0.0303877	70	rs3793577
20:44680853	genus.Parabacteroides.id.954	A/G	A	0.0263	0.01235	2.1649	0.030403	17339	rs12624433
1:175913828	genus.Phascolarctobacterium.id.2168	T/C	T	-0.02965	0.01384	-2.1644	0.0304183	11240	rs10913112
1:67146817	genus.Butyricimonas.id.945	T/C	C	-0.02991	0.01403	-2.1643	0.0304337	10785	rs10789214
14:75130235	genus..Clostridiuminnocuumgroup.id.14397	T/G	T	0.04696	0.02169	2.1639	0.0304797	4252	rs1045430
2:22503044	family.Actinomycetaceae.id.421	T/A	A	-0.03444	0.01602	-2.1635	0.0304951	7836	rs12052908
3:157977962	genus.RuminococcaceaeUCG003.id.11361	C/T	C	0.0257	0.01188	2.1638	0.0304951	14534	rs1095626
9:31124452	genus.unknowngenus.id.1000027565	C/G	C	-0.09731	0.04611	-2.1627	0.0305566	1066	rs34653192
9:31124452	family.vadinBE97.id.14446	C/G	C	-0.09731	0.04611	-2.1627	0.0305566	1066	rs34653192
14:75130235	phylum.Verrucomicrobia.id.3982	T/G	T	-0.02677	0.01267	-2.1624	0.030572	12516	rs1045430
11:70544937	genus.Parabacteroides.id.954	A/G	G	-0.0235	0.01084	-2.1621	0.0306028	17432	rs7117514
7:109099919	genus.Alloscardovia.id.435	A/G	G	0.307	0.14199	2.1622	0.0306028	95	rs58104186
9:120484009	family.Desulfovibrionaceae.id.3169	A/G	G	-0.02892	0.01225	-2.1618	0.0306336	15261	rs913930
9:23737627	class.Betaproteobacteria.id.2867	A/G	A	-0.02335	0.01081	-2.1616	0.030649	17277	rs3793577
7:117502574	genus.RuminococcaceaeUCG003.id.11361	T/C	C	0.02559	0.01187	2.1614	0.0306644	14534	rs7807677
4:123186393	genus.Methanobrevibacter.id.123	A/G	G	0.12741	0.06115	2.1613	0.0306799	2510	rs45510091
14:64697037	genus.Ralstonia.id.2909	T/C	T	0.21639	0.10015	2.1606	0.0307263	197	rs1152578
16:13066833	family.Marinilabiaceae.id.929	C/T	T	-0.45455	0.21048	-2.1596	0.0307882	53	rs7200826
20:39997404	genus.Bifidobacterium.id.436	G/T	T	0.36696	0.15449	2.1599	0.0307882	217	rs143186028
3:49214066	genus.Oxalobacter.id.2978	A/G	G	0.05494	0.02482	2.1597	0.0308036	4558	rs13084037
14:60141822	genus.Veillonella.id.2198	T/G	G	0.03386	0.01662	2.1595	0.0308192	9416	rs1956373
1:80809636	genus.Fusobacterium.id.2210	G/A	A	-0.09149	0.04315	-2.1586	0.0308812	1544	rs113188507
18:35138245	genus.Clostridiumsensustricto1.id.1873	G/A	A	-0.02689	0.01255	-2.1582	0.0309123	14247	rs12967855
5:87545318	genus.Romboutsia.id.11347	C/T	C	0.0257	0.0119	2.1583	0.0309123	14321	rs3099439
16:21639710	genus.Prevotella6.id.11181	C/A	C	-0.15279	0.07038	-2.1577	0.0309434	408	rs12923444
3:157977962	genus.Acetitomaculum.id.1989	C/T	C	0.17259	0.07938	2.1579	0.0309434	320	rs1095626
6:27835435	phylum.Bacteroidetes.id.905	A/G	G	-0.03559	0.01628	-2.1577	0.0309434	17946	rs200949
5:61509655	family.unknownfamily.id.987	C/T	T	0.06419	0.02955	2.1569	0.0310213	2276	rs60157091
5:61509655	genus.unknowngenus.id.1000013899	C/T	T	0.06419	0.02955	2.1569	0.0310213	2276	rs60157091
18:50731802	genus.Serratia.id.3523	G/A	A	0.49753	0.23071	2.1565	0.0310524	33	rs7227069
9:31124452	genus.Undibacterium.id.2983	C/G	C	0.59692	0.2768	2.1565	0.0310524	25	rs34653192
6:165121844	genus.unknowngenus.id.1868	A/T	A	0.0298	0.01397	2.1555	0.0311305	10390	rs2029865
14:42074726	genus.Anaerococcus.id.1937	A/G	G	-0.12972	0.05923	-2.1542	0.0312088	555	rs61990288
2:86819128	genus.Weissella.id.1843	T/C	C	0.23928	0.11107	2.1544	0.0312245	312	rs7585722
14:64697037	genus.Lutaonella.id.1162	T/C	T	0.41535	0.19284	2.1538	0.0312559	51	rs1152578
11:61471678	genus.Prevotella2.id.11180	C/T	T	0.08412	0.04283	2.1536	0.0312873	2199	rs198457
6:142996618	genus.Acidaminococcus.id.2167	C/G	G	0.06188	0.02892	2.1528	0.0313344	2434	rs2876520
7:109099919	genus.unknowngenus.id.1000077412	A/G	G	0.34862	0.16192	2.153	0.0313344	72	rs58104186
7:109099919	family.unknownfamily.id.1000077411	A/G	G	0.34862	0.16192	2.153	0.0313344	72	rs58104186
6:27835435	genus.Enterobacter.id.3502	A/G	G	-0.30413	0.1413	-2.1524	0.0313501	292	rs200949
1:175913828	family.Eubacteriaceae.id.1928	T/C	T	-0.06541	0.03035	-2.1519	0.0313973	2308	rs10913112
4:3207142	genus.LachnospiraceaeAC2044group.id.11313	A/G	G	-0.21761	0.10112	-2.152	0.0313973	198	rs7685686
5:61509655	genus.Pseudobutyrivibrio.id.2010	C/T	T	-0.07324	0.03469	-2.1511	0.0314604	1702	rs60157091
1:197704717	genus.Howardella.id.2000	C/T	T	0.06685	0.02979	2.1511	0.0314762	3835	rs17641524
1:197704717	genus.Faecalitalea.id.11392	C/T	T	-0.07256	0.03408	-2.1502	0.0315236	2817	rs17641524
12:23987925	genus.RuminococcaceaeUCG014.id.11371	T/G	G	0.03938	0.01865	2.1504	0.0315394	13955	rs78337797
2:157111313	genus.Prevotella9.id.11183	C/T	C	0.03652	0.01684	2.15	0.0315552	10398	rs1226412
9:31124452	genus.Hungatella.id.11306	C/G	C	-0.05321	0.02425	-2.1498	0.0315552	3980	rs34653192
5:93071630	genus.unknowngenus.id.964	G/C	C	-0.07283	0.03372	-2.1495	0.0315869	2641	rs10061069
6:165121844	genus.Clostridiumsensustricto19.id.1883	A/T	A	0.47358	0.22032	2.1495	0.0316027	37	rs2029865
11:57650796	genus.FamilyXIIIUCG002.id.11295	C/T	T	-0.32709	0.15223	-2.1486	0.0316661	93	rs2509805
14:60141822	genus.FamilyXIIIUCG002.id.11295	T/G	G	-0.35304	0.16431	-2.1486	0.0316661	93	rs1956373
17:27363750	genus.Ruminiclostridium6.id.11356	G/A	A	-0.04275	0.01974	-2.1481	0.0316979	13088	rs75581564
20:39997404	genus.unknowngenus.id.826	G/T	T	0.32847	0.14979	2.1479	0.0317296	231	rs143186028
13:99115041	genus.Solobacterium.id.2161	T/C	T	0.07316	0.0338	2.1477	0.0317455	1858	rs4772087
16:6315880	family.Corynebacteriaceae.id.448	A/G	G	0.11119	0.05148	2.1476	0.0317455	828	rs7193263
16:6315880	genus.unknowngenus.id.1000006162	A/G	G	-0.04525	0.02081	-2.1473	0.0317614	5098	rs7193263
16:6315880	family.unknownfamily.id.1000006161	A/G	G	-0.04525	0.02081	-2.1473	0.0317614	5098	rs7193263
4:42110353	genus.RuminococcaceaeNK4A214group.id.11358	T/C	C	-0.03955	0.01832	-2.1473	0.0317614	14820	rs34937911
12:84465022	genus.Tyzzerella3.id.11335	G/T	G	0.04572	0.02211	2.1472	0.0317933	5482	rs56314503
1:50559162	order.Victivallales.id.2254	A/G	G	-0.06986	0.03381	-2.1466	0.0318092	4735	rs11579246
1:50559162	class.Lentisphaeria.id.2250	A/G	G	-0.06986	0.03381	-2.1466	0.0318092	4735	rs11579246
16:7666402	genus.Tyzzerella4.id.11336	C/T	C	0.07347	0.03544	2.1461	0.031873	1728	rs7198928
16:21639710	family.FamilyXIII.id.1957	C/A	C	-0.02361	0.01105	-2.1445	0.0319848	16776	rs12923444
3:157977962	genus.Clostridiumsensustricto1.id.1873	C/T	C	0.02553	0.01199	2.144	0.0320329	14254	rs1095626
1:73668836	order.Oceanospirillales.id.3593	A/G	A	0.12847	0.05991	2.1436	0.032065	553	rs10890020
4:123186393	family.Methanobacteriaceae.id.121	A/G	G	0.12545	0.06077	2.1434	0.032081	2541	rs45510091
4:123186393	class.Methanobacteria.id.119	A/G	G	0.12545	0.06077	2.1434	0.032081	2541	rs45510091
9:120484009	order.Desulfovibrionales.id.3156	A/G	G	-0.02866	0.01225	-2.1424	0.0321613	15264	rs913930
7:117502574	class.Opitutae.id.3988	T/C	C	-0.07604	0.03522	-2.1413	0.0322418	1636	rs7807677
4:123186393	order.Burkholderiales.id.2874	A/G	G	-0.06146	0.02864	-2.1399	0.0323548	11679	rs45510091
9:120484009	family.Pasteurellaceae.id.3689	A/G	G	0.03405	0.01563	2.14	0.0323548	9495	rs913930
9:120484009	order.Pasteurellales.id.3688	A/G	G	0.03405	0.01563	2.14	0.0323548	9495	rs913930
12:84465022	genus.Samsonia.id.14644	G/T	G	0.35293	0.16499	2.1391	0.0324357	102	rs56314503
1:8489302	genus.unknowngenus.id.3624	T/C	C	-0.20029	0.09298	-2.139	0.0324357	229	rs301799
6:66565703	genus.Ruminiclostridium1.id.11354	T/C	C	-0.33951	0.15882	-2.1389	0.0324357	86	rs9363467
1:73668836	genus.unknowngenus.id.2001	A/G	A	0.03151	0.01414	2.1389	0.0324519	10225	rs10890020
6:165121844	genus.FamilyXIIIUCG002.id.11295	A/T	A	-0.30775	0.1439	-2.1387	0.0324519	93	rs2029865
2:58012833	genus.Pyramidobacter.id.3912	C/T	T	0.90759	0.42446	2.1382	0.0325167	15	rs1568452
6:27835435	genus.Tyzzerella3.id.11335	A/G	G	-0.06572	0.03034	-2.1379	0.0325167	5345	rs200949
10:1795194	family.Enterococcaceae.id.1828	C/T	T	0.08514	0.03945	2.1369	0.0326143	1340	rs997934
1:52342427	genus.Haemophilus.id.3698	T/C	C	-0.02884	0.01515	-2.1367	0.0326143	9201	rs1890946
6:27835435	genus.Klebsiella.id.3507	A/G	G	-0.16287	0.07429	-2.1365	0.0326305	893	rs200949
18:35138245	genus.Murdochiella.id.1944	G/A	A	0.75532	0.3536	2.1361	0.0326794	13	rs12967855
5:87545318	genus.Murdochiella.id.1944	C/T	C	0.7209	0.33748	2.1361	0.0326794	13	rs3099439
3:157977962	genus.Coprococcus1.id.11301	C/T	C	0.02342	0.01102	2.1351	0.032761	16866	rs1095626
4:3207142	genus.Lactococcus.id.1851	A/G	G	0.04779	0.02207	2.1349	0.0327773	4170	rs7685686
1:72765116	genus.Scardovia.id.440	G/A	G	-0.31146	0.14592	-2.1345	0.0327937	91	rs2568958
14:60141822	genus..Eubacteriumrectalegroup.id.14374	T/G	G	0.02642	0.01225	2.1344	0.0328101	17483	rs1956373
12:84465022	genus..Eubacteriumrectalegroup.id.14374	G/T	G	0.02621	0.01253	2.1339	0.0328592	17483	rs56314503
2:208044470	family.Leuconostocaceae.id.1839	A/G	A	-0.07308	0.03265	-2.1336	0.0328592	2320	rs62188629
2:22503044	order.Actinomycetales.id.420	T/A	A	-0.03396	0.01601	-2.1338	0.0328592	7837	rs12052908
16:13755530	genus.Asaccharospora.id.11344	A/G	G	-0.48557	0.2276	-2.1334	0.0328919	43	rs56887639
16:21639710	genus.Anaerofilum.id.2053	C/A	C	-0.04274	0.02001	-2.133	0.0329083	5058	rs12923444
9:36999369	genus.Citrobacter.id.3497	C/T	T	0.16565	0.07765	2.1334	0.0329083	345	rs7030813
15:37643831	genus.Lachnoclostridium12.id.11311	C/T	C	-0.26598	0.12245	-2.1329	0.0329247	135	rs8037355
1:37192741	genus.Coprococcus1.id.11301	T/C	C	-0.02495	0.01183	-2.1324	0.0329576	16866	rs1002656
1:72765116	order.OpitutaevadinHA64.id.11585	G/A	G	-0.07839	0.03654	-2.1323	0.032974	1616	rs2568958
1:72765116	family.unknownfamily.id.1000000271	G/A	G	-0.07839	0.03654	-2.1323	0.032974	1616	rs2568958
1:72765116	genus.unknowngenus.id.1000000272	G/A	G	-0.07839	0.03654	-2.1323	0.032974	1616	rs2568958
1:8489302	genus.Anaerotruncus.id.2054	T/C	C	-0.02367	0.01118	-2.1317	0.0330233	16688	rs301799
8:65562019	genus.Christensenella.id.1867	T/G	T	0.14749	0.06685	2.1311	0.0330891	825	rs7837935
6:142996618	genus.Bacteroides.id.918	C/G	G	-0.02293	0.01065	-2.1306	0.0331221	17954	rs2876520
6:142996618	family.Bacteroidaceae.id.917	C/G	G	-0.02293	0.01065	-2.1306	0.0331221	17954	rs2876520
13:99115041	genus.Allisonella.id.2174	T/C	T	-0.05645	0.02572	-2.13	0.0331551	3248	rs4772087
16:13755530	genus.Raoultella.id.3521	A/G	G	0.40986	0.19249	2.1292	0.0332377	104	rs56887639
13:99115041	genus.Parvimonas.id.1945	T/C	T	-0.1208	0.05429	-2.1285	0.0332874	725	rs4772087
1:50559162	family.Staphylococcaceae.id.1775	A/G	G	0.26688	0.12117	2.1288	0.0332874	371	rs11579246
9:31124452	family.Christensenellaceae.id.1866	C/G	C	0.0255	0.01187	2.1287	0.0332874	16471	rs34653192
10:106610839	genus.Propionibacterium.id.727	A/G	A	0.2684	0.12611	2.1282	0.0333205	134	rs1021363
1:50559162	class.Erysipelotrichia.id.2147	A/G	G	-0.03938	0.01738	-2.1281	0.0333205	17435	rs11579246
1:50559162	family.Erysipelotrichaceae.id.2149	A/G	G	-0.03938	0.01738	-2.1281	0.0333205	17435	rs11579246
1:50559162	order.Erysipelotrichales.id.2148	A/G	G	-0.03938	0.01738	-2.1281	0.0333205	17435	rs11579246
20:39997404	genus.Pseudobutyrivibrio.id.2010	G/T	T	0.4163	0.19621	2.1274	0.0334035	127	rs143186028
13:66941792	genus.Alloprevotella.id.961	A/G	G	0.05481	0.02569	2.1271	0.0334201	3073	rs9592461
9:119731045	genus.LachnospiraceaeUCG010.id.11330	T/G	G	-0.0288	0.01358	-2.1268	0.0334201	13318	rs10817969
12:23987925	genus.Catenibacterium.id.2153	T/G	G	0.08926	0.04049	2.1261	0.0335033	3039	rs78337797
18:50731802	family.Bacteroidaceae.id.917	G/A	A	-0.02274	0.01081	-2.1258	0.0335033	17624	rs7227069
18:50731802	genus.Bacteroides.id.918	G/A	A	-0.02274	0.01081	-2.1258	0.0335033	17624	rs7227069
6:165121844	genus.RuminococcaceaeUCG009.id.11366	A/T	A	0.03403	0.01643	2.1257	0.0335366	7565	rs2029865
2:58012833	genus.Lachnoclostridium.id.11308	C/T	T	-0.02299	0.01085	-2.124	0.0336534	18055	rs1568452
4:123186393	genus.unknowngenus.id.1000009363	A/G	G	-0.73173	0.34452	-2.1239	0.0336701	59	rs45510091
6:27835435	family.Corynebacteriaceae.id.448	A/G	G	0.15738	0.07473	2.1238	0.0336869	828	rs200949
10:1795194	genus.Clostridiumsensustricto19.id.1883	C/T	T	-0.47655	0.22441	-2.1236	0.0337036	37	rs997934
1:72765116	genus.Senegalimassilia.id.11160	G/A	G	-0.03737	0.01752	-2.1234	0.0337204	6977	rs2568958
3:61192911	genus.Paraprevotella.id.962	A/G	A	0.17239	0.08105	2.1235	0.0337204	318	rs141954845
6:142996618	genus.Parabacteroides.id.954	C/G	G	-0.02291	0.01096	-2.1228	0.0337539	16958	rs2876520
11:61471678	genus..Eubacteriumcoprostanoligenesgroup.id.11375	C/T	T	0.03339	0.01435	2.1224	0.0338042	17093	rs198457
1:50559162	genus.Burkholderia.Paraburkholderia.id.14563	A/G	G	-0.21177	0.09976	-2.1221	0.033821	478	rs11579246
9:119731045	class.Mollicutes.id.3920	T/G	G	-0.03135	0.01462	-2.1203	0.0339723	11480	rs10817969
9:119731045	phylum.Tenericutes.id.3919	T/G	G	-0.03135	0.01462	-2.1203	0.0339723	11480	rs10817969
7:82936909	family.Porphyromonadaceae.id.943	C/T	T	-0.02239	0.01063	-2.1197	0.0340229	18158	rs16887442
1:73668836	genus.Mannheimia.id.3701	A/G	A	0.48959	0.231	2.1194	0.0340567	33	rs10890020
16:6315880	genus.Corynebacterium.id.449	A/G	G	0.20787	0.09793	2.1194	0.0340736	221	rs7193263
11:113370758	genus.RuminococcaceaeUCG004.id.11362	A/G	A	-0.03046	0.01523	-2.1187	0.0341074	9635	rs61902811
7:82936909	genus.Eisenbergiella.id.11304	C/T	T	-0.04065	0.01904	-2.1187	0.0341074	5640	rs16887442
9:23737627	genus..Eubacteriumventriosumgroup.id.11341	A/G	A	-0.0242	0.01144	-2.1185	0.0341243	15421	rs3793577
18:50731802	family.Coriobacteriaceae.id.811	G/A	A	0.02324	0.01097	2.118	0.0341751	17076	rs7227069
18:50731802	order.Coriobacteriales.id.810	G/A	A	0.02324	0.01097	2.118	0.0341751	17076	rs7227069
18:50731802	class.Coriobacteriia.id.809	G/A	A	0.02324	0.01097	2.118	0.0341751	17076	rs7227069
7:82454404	order.Thermomicrobiales.id.1489	C/G	C	0.29183	0.13778	2.118	0.0341751	101	rs2247523
7:82454404	phylum.Chloroflexi.id.1385	C/G	C	0.29183	0.13778	2.118	0.0341751	101	rs2247523
7:82454404	class.Thermomicrobia.id.1482	C/G	C	0.29183	0.13778	2.118	0.0341751	101	rs2247523
7:82454404	family.Thermomicrobiaceae.id.1490	C/G	C	0.29183	0.13778	2.118	0.0341751	101	rs2247523
7:82454404	genus.unknowngenus.id.1000073287	C/G	C	0.29183	0.13778	2.118	0.0341751	101	rs2247523
16:21639710	genus..Ruminococcustorquesgroup.id.14377	C/A	C	-0.0227	0.01074	-2.1177	0.034192	17818	rs12923444
12:23987925	class.Deltaproteobacteria.id.3087	T/G	G	0.04098	0.01835	2.1168	0.0342768	14516	rs78337797
9:119731045	genus.unknowngenus.id.1000001215	T/G	G	0.04261	0.02034	2.1169	0.0342768	5934	rs10817969
9:119731045	family.unknownfamily.id.1000001214	T/G	G	0.04261	0.02034	2.1169	0.0342768	5934	rs10817969
2:208044470	order.unknownorder.id.11571	A/G	A	0.0664	0.02965	2.1166	0.0343108	2705	rs62188629
2:208044470	class.unknownclass.id.11570	A/G	A	0.0664	0.02965	2.1166	0.0343108	2705	rs62188629
2:208044470	phylum.Saccharibacteria.id.11569	A/G	A	0.0664	0.02965	2.1166	0.0343108	2705	rs62188629
2:208044470	family.unknownfamily.id.11572	A/G	A	0.0664	0.02965	2.1166	0.0343108	2705	rs62188629
16:7666402	genus.Lachnospira.id.2004	C/T	C	-0.02421	0.01139	-2.116	0.0343448	16590	rs7198928
9:31124452	genus.unknowngenus.id.826	C/G	C	0.02718	0.0132	2.1161	0.0343448	13174	rs34653192
3:49214066	genus..Eubacteriumeligensgroup.id.14372	A/G	G	-0.02945	0.01427	-2.1156	0.0343788	14216	rs13084037
7:117502574	genus.Megasphaera.id.2185	T/C	C	-0.06897	0.03231	-2.1155	0.0343788	1934	rs7807677
9:31124452	genus.Megamonas.id.2184	C/G	C	0.11744	0.05692	2.1138	0.0345495	877	rs34653192
9:126634255	genus.possiblegenusSk018.id.2019	C/T	C	-0.41184	0.1949	-2.1131	0.0345837	70	rs2670139
10:106610839	genus.LachnospiraceaeUCG003.id.11323	A/G	A	0.06341	0.02979	2.1129	0.0346179	2552	rs1021363
12:121205078	genus.Ruminococcus2.id.11374	A/G	A	0.02389	0.01141	2.113	0.0346179	15472	rs3213572
14:104017953	genus.Peptoniphilus.id.1946	A/G	A	0.12958	0.06063	2.1124	0.0346693	535	rs10149470
7:117502574	order.OpitutaevadinHA64.id.11585	T/C	C	-0.07533	0.03545	-2.1117	0.0347036	1616	rs7807677
7:117502574	family.unknownfamily.id.1000000271	T/C	C	-0.07533	0.03545	-2.1117	0.0347036	1616	rs7807677
7:117502574	genus.unknowngenus.id.1000000272	T/C	C	-0.07533	0.03545	-2.1117	0.0347036	1616	rs7807677
7:82454404	genus.unknowngenus.id.826	C/G	C	-0.02686	0.01231	-2.1118	0.0347036	13404	rs2247523
2:86819128	family.unknownfamily.id.11572	T/C	C	-0.08268	0.03738	-2.1115	0.0347208	2519	rs7585722
2:86819128	order.unknownorder.id.11571	T/C	C	-0.08268	0.03738	-2.1115	0.0347208	2519	rs7585722
2:86819128	class.unknownclass.id.11570	T/C	C	-0.08268	0.03738	-2.1115	0.0347208	2519	rs7585722
2:86819128	phylum.Saccharibacteria.id.11569	T/C	C	-0.08268	0.03738	-2.1115	0.0347208	2519	rs7585722
13:53647048	order.Verrucomicrobiales.id.4030	C/A	A	0.02796	0.01334	2.1115	0.0347379	11998	rs1343605
13:53647048	family.Verrucomicrobiaceae.id.4036	C/A	A	0.02796	0.01334	2.1115	0.0347379	11998	rs1343605
13:53647048	class.Verrucomicrobiae.id.4029	C/A	A	0.02796	0.01334	2.1115	0.0347379	11998	rs1343605
7:12253880	genus.Victivallis.id.2256	A/G	A	0.05289	0.0246	2.1111	0.0347723	3376	rs2043539
1:197704717	genus.Akkermansia.id.4037	C/T	T	-0.0358	0.01667	-2.1104	0.0348239	11997	rs17641524
14:75130235	genus.unknowngenus.id.1000006162	T/G	T	0.04262	0.01979	2.1094	0.0349101	5107	rs1045430
14:75130235	family.unknownfamily.id.1000006161	T/G	T	0.04262	0.01979	2.1094	0.0349101	5107	rs1045430
1:37192741	genus.Pseudoflavonifractor.id.2066	T/C	C	0.06714	0.0313	2.1096	0.0349101	2395	rs1002656
6:66565703	genus.Tyzzerella.id.11334	T/C	C	0.21639	0.10236	2.1094	0.0349101	216	rs9363467
13:53647048	genus.Leuconostoc.id.1841	C/A	A	-0.07622	0.03688	-2.1091	0.0349273	1597	rs1343605
1:181740924	genus.Romboutsia.id.11347	G/A	G	-0.02962	0.01401	-2.1087	0.0349619	13699	rs169235
1:73668836	class.Bacilli.id.1673	A/G	A	0.02259	0.01077	2.1083	0.0350137	17509	rs10890020
1:181740924	genus.Cloacibacillus.id.3908	G/A	G	0.15863	0.07522	2.108	0.035031	465	rs169235
18:53099012	genus.Granulicatella.id.1821	G/C	G	-0.0684	0.03163	-2.1077	0.0350483	2351	rs12967143
1:80809636	genus.Atopobium.id.814	G/A	A	-0.11702	0.05495	-2.107	0.0351002	826	rs113188507
18:77580712	genus.Eisenbergiella.id.11304	G/A	A	-0.05069	0.02459	-2.1068	0.0351349	5465	rs7241572
9:126634255	family.FamilyXIII.id.1957	C/T	C	-0.02607	0.0123	-2.1062	0.0351696	16863	rs2670139
10:1795194	genus.Anaerotruncus.id.2054	C/T	T	0.02377	0.01127	2.1059	0.0352217	16690	rs997934
16:13066833	genus.Succiniclasticum.id.2169	C/T	T	0.47313	0.22469	2.1057	0.0352391	43	rs7200826
9:120484009	genus.Succiniclasticum.id.2169	A/G	G	0.45337	0.21531	2.1057	0.0352391	43	rs913930
3:157977962	genus..Ruminococcusgauvreauiigroup.id.11342	C/T	C	-0.02579	0.01231	-2.1051	0.0352739	13515	rs1095626
10:106610839	genus.Atopobium.id.814	A/G	A	-0.11144	0.05146	-2.1039	0.0353784	826	rs1021363
5:93071630	genus.Ralstonia.id.2909	G/C	C	-0.24961	0.11864	-2.1039	0.0353784	197	rs10061069
13:99115041	genus.unknowngenus.id.1000003999	T/C	T	0.06011	0.02883	2.1035	0.0354308	2589	rs4772087
1:197704717	family.Verrucomicrobiaceae.id.4036	C/T	T	-0.03565	0.01667	-2.1025	0.0355007	11998	rs17641524
5:61509655	genus.Acinetobacter.id.3711	C/T	T	0.13413	0.06326	2.1019	0.0355708	492	rs60157091
15:37643831	genus.CandidatusSoleaferrea.id.11350	C/T	C	-0.03843	0.01816	-2.1013	0.0356059	6202	rs8037355
14:104017953	genus.LachnospiraceaeUCG010.id.11330	A/G	A	-0.02622	0.01245	-2.101	0.0356234	12901	rs10149470
20:44680853	genus.Methanobrevibacter.id.123	A/G	A	0.05817	0.02708	2.1013	0.0356234	3532	rs12624433
7:82936909	genus.Campylobacter.id.3275	C/T	T	-0.10755	0.04903	-2.1009	0.035641	840	rs16887442
5:103972357	genus.Bifidobacterium.id.436	G/A	A	-0.02713	0.01267	-2.1007	0.0356585	14910	rs30266
10:1795194	genus.Acidaminococcus.id.2167	C/T	T	-0.05833	0.02811	-2.1005	0.0356761	2711	rs997934
5:61509655	genus.Murimonas.id.14368	C/T	T	0.41037	0.19535	2.1007	0.0356761	48	rs60157091
9:23737627	genus.Aurantiacicella.id.14291	A/G	A	-0.34413	0.16383	-2.1005	0.0356761	72	rs3793577
6:142996618	genus.LachnospiraceaeND3007group.id.11317	C/G	G	-0.02445	0.01159	-2.0998	0.0357288	15152	rs2876520
20:39997404	genus.Asaccharobacter.id.813	G/T	T	0.78755	0.37509	2.0996	0.035764	40	rs143186028
1:72765116	genus.Lelliottia.id.14638	G/A	G	-0.77786	0.37057	-2.0991	0.0357993	11	rs2568958
2:157111313	genus.unknowngenus.id.1000000073	C/T	C	0.03626	0.01689	2.0994	0.0357993	10568	rs1226412
2:157111313	family.ClostridialesvadinBB60group.id.11286	C/T	C	0.03626	0.01689	2.0994	0.0357993	10568	rs1226412
9:23737627	genus.Succinispira.id.2170	A/G	A	0.41927	0.19975	2.099	0.0358345	47	rs3793577
22:41487218	genus.Flavonifractor.id.2059	C/T	C	0.0325	0.01569	2.0987	0.0358522	10268	rs5995992
12:84465022	family.Peptostreptococcaceae.id.2042	G/T	G	-0.02771	0.013	-2.0982	0.0358698	16193	rs56314503
7:12253880	genus.Prevotella.id.963	A/G	A	0.06157	0.02898	2.0981	0.0359051	2440	rs2043539
9:120484009	genus.RuminococcaceaeUCG008.id.11365	A/G	G	-0.06479	0.03192	-2.098	0.0359051	2200	rs913930
17:27363750	class.Melainabacteria.id.1589	G/A	A	-0.06315	0.02958	-2.0977	0.0359228	5816	rs75581564
5:61509655	genus.Cloacibacillus.id.3908	C/T	T	0.12789	0.05959	2.0979	0.0359228	561	rs60157091
7:12253880	genus.Collinsella.id.815	A/G	A	-0.02492	0.01194	-2.0971	0.0359759	14467	rs2043539
1:8489302	family.Enterococcaceae.id.1828	T/C	C	0.08908	0.04005	2.096	0.0360822	1340	rs301799
5:164523472	genus.Tyzzerella.id.11334	C/A	A	-0.05859	0.02762	-2.0954	0.0361177	2699	rs11135349
9:17016503	genus.Desulfovibrio.id.3173	T/A	T	0.03086	0.01467	2.0958	0.0361177	9333	rs263645
14:60141822	genus.unknowngenus.id.1000006162	T/G	G	-0.04814	0.02268	-2.0949	0.036171	5106	rs1956373
14:60141822	family.unknownfamily.id.1000006161	T/G	G	-0.04814	0.02268	-2.0949	0.036171	5106	rs1956373
18:53099012	family.Peptostreptococcaceae.id.2042	G/C	G	-0.02516	0.01209	-2.0945	0.0362066	16179	rs12967143
1:197704717	class.Verrucomicrobiae.id.4029	C/T	T	-0.0355	0.01667	-2.0938	0.03626	11998	rs17641524
1:197704717	order.Verrucomicrobiales.id.4030	C/T	T	-0.0355	0.01667	-2.0938	0.03626	11998	rs17641524
17:27363750	genus.Coprococcus2.id.11302	G/A	A	0.04672	0.02151	2.0937	0.0362956	11092	rs75581564
13:53647048	genus.Akkermansia.id.4037	C/A	A	0.02771	0.01334	2.0931	0.0363491	11997	rs1343605
7:117502574	genus.LachnospiraceaeUCG006.id.11326	T/C	C	0.45675	0.21834	2.0919	0.0364564	43	rs7807677
8:65562019	genus.Pseudocitrobacter.id.14642	T/G	T	0.16477	0.07762	2.0917	0.0364743	764	rs7837935
15:37643831	class.Cytophagia.id.989	C/T	C	-0.3706	0.1772	-2.0914	0.0364922	64	rs8037355
15:37643831	order.Cytophagales.id.990	C/T	C	-0.3706	0.1772	-2.0914	0.0364922	64	rs8037355
5:93071630	family.FamilyXIII.id.1957	G/C	C	0.02742	0.01341	2.0913	0.0365101	16870	rs10061069
7:2110346	genus.Clostridiumsensustricto19.id.1883	T/C	C	0.57786	0.27633	2.0912	0.0365101	37	rs3823624
17:27363750	genus.Shewanella.id.3400	G/A	A	0.2768	0.13105	2.0905	0.0365819	278	rs75581564
17:27363750	family.Shewanellaceae.id.3399	G/A	A	0.2768	0.13105	2.0905	0.0365819	278	rs75581564
11:57650796	genus.Paraprevotella.id.962	C/T	T	-0.03758	0.01855	-2.0901	0.0365998	7281	rs2509805
1:175913828	order.Burkholderiales.id.2874	T/C	T	-0.0233	0.01119	-2.09	0.0366178	17223	rs10913112
5:61509655	genus.Sutterella.id.2896	C/T	T	0.0257	0.01228	2.0897	0.0366537	13342	rs60157091
11:57650796	family.Campylobacteraceae.id.3273	C/T	T	0.11033	0.05366	2.089	0.0367257	858	rs2509805
20:39997404	genus.RuminococcaceaeUCG010.id.11367	G/T	T	-0.20263	0.09792	-2.0881	0.0367798	524	rs143186028
16:21639710	family.Propionibacteriaceae.id.714	C/A	C	-0.24537	0.11754	-2.0876	0.0368159	141	rs12923444
9:119731045	genus.Samsonia.id.14644	T/G	G	-0.30927	0.14815	-2.0875	0.0368339	102	rs10817969
7:117502574	genus.LachnospiraceaeUCG008.id.11328	T/C	C	-0.0357	0.01695	-2.0872	0.036852	7140	rs7807677
6:27835435	order.Bacteroidales.id.913	A/G	G	-0.03443	0.01628	-2.0861	0.0369605	17945	rs200949
6:27835435	class.Bacteroidia.id.912	A/G	G	-0.03443	0.01628	-2.0861	0.0369605	17945	rs200949
11:113370758	genus.Butyricicoccus.id.2055	A/G	A	-0.02442	0.01142	-2.0851	0.0370511	17266	rs61902811
13:53647048	genus.Turicibacter.id.2162	C/A	A	0.03112	0.01539	2.0852	0.0370693	9080	rs1343605
7:12253880	genus.CandidatusSaccharimonas.id.11573	A/G	A	0.58208	0.27916	2.0851	0.0370693	23	rs2043539
22:41487218	class.Alphaproteobacteria.id.2379	C/T	C	-0.03358	0.01623	-2.0838	0.0371602	9530	rs5995992
14:64697037	genus.Weissella.id.1843	T/C	T	-0.11704	0.05597	-2.0837	0.0371784	685	rs1152578
16:7666402	genus.Anaerovirgula.id.1902	C/T	C	-0.41164	0.19756	-2.0836	0.0371784	53	rs7198928
7:117502574	class.Gammaproteobacteria.id.3303	T/C	C	0.02357	0.01127	2.0839	0.0371784	16158	rs7807677
1:175913828	genus.LachnospiraceaeNC2004group.id.11316	T/C	T	0.03802	0.01821	2.0836	0.0372148	6462	rs10913112
15:37643831	genus.Lachnoclostridium.id.11308	C/T	C	0.02208	0.01064	2.0832	0.0372512	18051	rs8037355
9:17016503	genus.Dorea.id.1997	T/A	T	0.02225	0.01065	2.0825	0.0373059	17736	rs263645
2:86819128	genus.Odoribacter.id.952	T/C	C	0.03445	0.01618	2.0821	0.0373425	14241	rs7585722
9:2983774	genus.Enorma.id.13901	A/C	C	-0.39735	0.19092	-2.0812	0.0374156	54	rs1354115
22:41487218	genus.ErysipelotrichaceaeUCG004.id.11385	C/T	C	-0.17916	0.08453	-2.0807	0.0374522	337	rs5995992
11:61471678	genus.Diaphorobacter.id.2928	C/T	T	-0.36978	0.17786	-2.0791	0.037599	114	rs198457
11:57650796	order.Aeromonadales.id.3316	C/T	T	-0.24086	0.11587	-2.0788	0.0376174	226	rs2509805
9:31124452	genus.Acidaminococcus.id.2167	C/G	C	0.06399	0.03121	2.0791	0.0376174	2382	rs34653192
10:106610839	genus.Murimonas.id.14368	A/G	A	0.42623	0.20503	2.0789	0.0376357	48	rs1021363
11:61471678	genus.Allisonella.id.2174	C/T	T	-0.06909	0.03362	-2.0766	0.03782	3248	rs198457
9:17016503	genus.Ruminiclostridium5.id.11355	T/A	T	0.0224	0.01072	2.0768	0.0378385	17523	rs263645
18:50731802	family.Marinilabiaceae.id.929	G/A	A	-0.38824	0.18701	-2.076	0.0378755	53	rs7227069
11:30892824	class.Bacilli.id.1673	A/G	A	-0.02246	0.01084	-2.0759	0.037894	17509	rs1448938
11:70544937	genus.Holdemanella.id.11393	A/G	G	-0.03305	0.01615	-2.0757	0.0379125	7836	rs7117514
1:175913828	genus.Senegalimassilia.id.11160	T/C	T	0.0369	0.01759	2.0753	0.037968	6977	rs10913112
14:42074726	family.Micrococcaceae.id.636	A/G	G	-0.06853	0.03256	-2.0746	0.0380051	1865	rs61990288
4:42110353	genus.Lachnoclostridium.id.11308	T/C	C	0.03636	0.017	2.0742	0.0380607	17241	rs34937911
14:75130235	family.Desulfovibrionaceae.id.3169	T/G	T	-0.02392	0.01149	-2.0736	0.0380979	15261	rs1045430
20:39997404	genus.Papillibacter.id.2065	G/T	T	0.60344	0.29101	2.0736	0.0381351	54	rs143186028
11:61471678	genus.Corynebacterium1.id.11143	C/T	T	0.73571	0.35499	2.0725	0.0382282	21	rs198457
6:105365891	genus.Barnesiella.id.944	C/G	C	-0.02453	0.01192	-2.0723	0.0382282	14340	rs1933802
9:119731045	class.Melainabacteria.id.1589	T/G	G	0.0417	0.02033	2.0725	0.0382282	5943	rs10817969
11:65314830	genus.Negativicoccus.id.2187	A/T	T	-0.96811	0.46775	-2.0697	0.0384711	9	rs58621819
5:87545318	genus.Tyzzerella.id.11334	C/T	C	0.05592	0.02735	2.0697	0.0384898	2701	rs3099439
6:105365891	genus.CandidatusStoquefichus.id.11379	C/G	C	-0.17334	0.08464	-2.0695	0.0384898	273	rs1933802
11:61471678	genus.unknowngenus.id.1000077492	C/T	T	0.52291	0.2442	2.0696	0.0385086	64	rs198457
4:42110353	genus.Hungatella.id.11306	T/C	C	0.07314	0.03494	2.0689	0.0385649	4077	rs34937911
16:6315880	genus.Yokenella.id.3532	A/G	G	0.26887	0.13	2.0683	0.0386212	124	rs7193263
1:37192741	genus.Holdemania.id.2157	T/C	C	0.03359	0.01603	2.0679	0.0386588	9193	rs1002656
20:39997404	genus.Anaerosporobacter.id.1990	G/T	T	0.46831	0.22646	2.068	0.0386588	92	rs143186028
11:70544937	class.Betaproteobacteria.id.2867	A/G	G	0.02276	0.01089	2.0677	0.0386777	17272	rs7117514
17:27363750	genus.unknowngenus.id.1868	G/A	A	-0.04677	0.02228	-2.0667	0.038753	10105	rs75581564
11:61471678	genus.LachnospiraceaeAC2044group.id.11313	C/T	T	0.25827	0.12497	2.0666	0.0387719	198	rs198457
2:157111313	genus.Rikenella.id.973	C/T	C	0.32489	0.1544	2.0662	0.0388096	107	rs1226412
10:106610839	genus.Enorma.id.13901	A/G	A	-0.40137	0.19428	-2.0659	0.0388285	54	rs1021363
6:66565703	genus.Ezakiella.id.11289	T/C	C	0.22964	0.11118	2.0654	0.0388852	185	rs9363467
14:42074726	genus.Klebsiella.id.3507	A/G	G	-0.1291	0.06178	-2.0649	0.038923	528	rs61990288
20:39997404	family.Rikenellaceae.id.967	G/T	T	-0.19169	0.09271	-2.0647	0.0389419	594	rs143186028
5:61509655	class.Negativicutes.id.2164	C/T	T	-0.02167	0.01049	-2.0648	0.0389419	18285	rs60157091
1:181740924	genus..Eubacteriumruminantiumgroup.id.11340	G/A	G	-0.03886	0.01914	-2.0644	0.0389798	7348	rs169235
7:117502574	family.Enterobacteriaceae.id.3469	T/C	C	0.02535	0.01223	2.064	0.0390177	13711	rs7807677
7:117502574	order.Enterobacteriales.id.3468	T/C	C	0.02535	0.01223	2.064	0.0390177	13711	rs7807677
9:36999369	family.Flammeovirgaceae.id.1035	C/T	T	-0.37675	0.18253	-2.064	0.0390177	61	rs7030813
9:36999369	genus.Fulvitalea.id.13905	C/T	T	-0.37675	0.18253	-2.064	0.0390177	61	rs7030813
12:23987925	order.Desulfovibrionales.id.3156	T/G	G	0.03998	0.01837	2.0633	0.0390936	14495	rs78337797
16:13755530	genus.LachnospiraceaeNK4B4group.id.11320	A/G	G	0.07761	0.03776	2.0625	0.0391697	1732	rs56887639
12:23987925	family.Desulfovibrionaceae.id.3169	T/G	G	0.04005	0.01837	2.0622	0.0392077	14492	rs78337797
1:52342427	genus.Campylobacter.id.3275	T/C	C	0.10173	0.04896	2.0622	0.0392077	841	rs1890946
9:17016503	genus..Eubacteriumxylanophilumgroup.id.14375	T/A	T	-0.02531	0.01225	-2.0613	0.0392649	13410	rs263645
1:175913828	genus.unknowngenus.id.2200	T/C	T	-0.51356	0.24922	-2.0607	0.0393221	31	rs10913112
1:67146817	genus..Ruminococcusgnavusgroup.id.14376	T/C	C	0.0389	0.01814	2.0609	0.0393221	6529	rs10789214
7:82936909	genus.Lachnospira.id.2004	C/T	T	0.02344	0.01111	2.0606	0.0393603	16589	rs16887442
7:82454404	family.Lactobacillaceae.id.1836	C/G	C	-0.03514	0.0169	-2.06	0.0393794	7191	rs2247523
10:106610839	genus..Eubacteriumnodatumgroup.id.11297	A/G	A	-0.05283	0.02574	-2.0598	0.0393985	3350	rs1021363
18:35138245	genus.Ruminiclostridium5.id.11355	G/A	A	-0.02332	0.01134	-2.0598	0.0393985	17524	rs12967855
5:164523472	genus.Parvimonas.id.1945	C/A	A	0.10974	0.05269	2.0597	0.0394368	722	rs11135349
18:35138245	family.Eubacteriaceae.id.1928	G/A	A	-0.06408	0.03103	-2.059	0.0394751	2306	rs12967855
18:52488672	genus.RuminococcaceaeUCG013.id.11370	C/T	T	0.0261	0.01289	2.0591	0.0394942	16903	rs62091461
17:27363750	genus.Oribacterium.id.2008	G/A	A	-0.23892	0.11694	-2.0586	0.0395134	376	rs75581564
11:30892824	genus.Halomonas.id.3616	A/G	A	0.1342	0.06453	2.0586	0.0395517	484	rs1448938
12:23987925	order.Bifidobacteriales.id.432	T/G	G	-0.03831	0.01857	-2.0584	0.0395517	14171	rs78337797
12:23987925	family.Bifidobacteriaceae.id.433	T/G	G	-0.03831	0.01857	-2.0584	0.0395517	14171	rs78337797
6:101387304	family.Desulfovibrionaceae.id.3169	T/A	A	-0.02467	0.01174	-2.0581	0.0395709	15253	rs7758630
7:82454404	genus.Biostraticola.id.3471	C/G	C	-0.16551	0.08262	-2.0581	0.0395709	387	rs2247523
18:50731802	genus.Prevotella9.id.11183	G/A	A	0.03002	0.01467	2.0578	0.0396285	9632	rs7227069
4:42110353	genus.Diaphorobacter.id.2928	T/C	C	-0.43319	0.21055	-2.0574	0.0396478	114	rs34937911
16:7666402	genus.Hespellia.id.1999	C/T	C	0.22026	0.10707	2.0572	0.039667	191	rs7198928
3:157977962	genus.Finegoldia.id.1940	C/T	C	-0.15504	0.07508	-2.0571	0.039667	356	rs1095626
5:164523472	genus.Atopobium.id.814	C/A	A	0.10213	0.04933	2.0563	0.0397632	826	rs11135349
3:49214066	family.FamilyXI.id.1936	A/G	G	0.06064	0.02982	2.0561	0.0397825	3196	rs13084037
2:157111313	genus.Fusicatenibacter.id.11305	C/T	C	-0.02842	0.01311	-2.0557	0.0398018	17512	rs1226412
18:35138245	genus.Intestinibacter.id.11345	G/A	A	-0.0276	0.01346	-2.0554	0.0398404	12430	rs12967855
17:27363750	family.unknownfamily.id.1000001214	G/A	A	-0.06187	0.02961	-2.0546	0.0398983	5807	rs75581564
17:27363750	genus.unknowngenus.id.1000001215	G/A	A	-0.06187	0.02961	-2.0546	0.0398983	5807	rs75581564
11:70544937	genus.Senegalimassilia.id.11160	A/G	G	0.03558	0.01705	2.0541	0.0399757	6977	rs7117514
9:36999369	family.Marinilabiaceae.id.929	C/T	T	-0.40027	0.19494	-2.0533	0.0400338	53	rs7030813
16:21639710	family.Acidaminococcaceae.id.2166	C/A	C	-0.02604	0.0128	-2.053	0.0400532	12555	rs12923444
1:50559162	genus.LachnospiraceaeNK4B4group.id.11320	A/G	G	-0.11837	0.05518	-2.0521	0.0401502	1732	rs11579246
22:41487218	genus.unknowngenus.id.1000009363	C/T	C	0.40731	0.19847	2.0522	0.0401502	59	rs5995992
2:208044470	genus.Undibacterium.id.2983	A/G	A	-0.59663	0.29077	-2.0519	0.0401697	25	rs62188629
1:80809636	genus.Lachnoclostridium.id.11308	G/A	A	0.02575	0.01215	2.0515	0.040228	18055	rs113188507
16:6315880	family.Bifidobacteriaceae.id.433	A/G	G	-0.02537	0.01218	-2.0507	0.0402864	15045	rs7193263
16:6315880	order.Bifidobacteriales.id.432	A/G	G	-0.02537	0.01218	-2.0507	0.0402864	15045	rs7193263
1:73668836	genus.Staphylococcus.id.1780	A/G	A	0.15745	0.07579	2.0509	0.0402864	341	rs10890020
13:66941792	genus.Parvimonas.id.1945	A/G	G	-0.10734	0.05229	-2.0496	0.040384	725	rs9592461
4:3207142	genus.Murimonas.id.14368	A/G	G	0.4084	0.19923	2.0499	0.040384	48	rs7685686
1:8489302	genus.Veillonella.id.2198	T/C	C	-0.03013	0.01497	-2.0492	0.0404426	9416	rs301799
6:101387304	order.Desulfovibrionales.id.3156	T/A	A	-0.02456	0.01173	-2.0491	0.0404426	15256	rs7758630
10:1795194	genus.Allisonella.id.2174	C/T	T	0.05258	0.02541	2.048	0.04056	3248	rs997934
11:88744425	genus.unknowngenus.id.1978	C/T	T	0.41915	0.20467	2.0479	0.0405796	44	rs7932640
11:88744425	family.Gracilibacteraceae.id.1975	C/T	T	0.41915	0.20467	2.0479	0.0405796	44	rs7932640
9:23737627	genus.Ruminiclostridium9.id.11357	A/G	A	-0.02251	0.01095	-2.0475	0.0405992	16845	rs3793577
16:13755530	genus.Holdemania.id.2157	A/G	G	0.03379	0.0165	2.0475	0.0406188	9193	rs56887639
13:53647048	genus.LachnospiraceaeUCG010.id.11330	C/A	A	-0.02495	0.01274	-2.0472	0.0406384	13320	rs1343605
5:87545318	genus.Samsonia.id.14644	C/T	C	-0.29609	0.1447	-2.0463	0.040717	102	rs3099439
9:31124452	genus.Dielma.id.11380	C/G	C	-0.07362	0.03487	-2.046	0.0407367	1874	rs34653192
1:72765116	genus.Acidaminococcus.id.2167	G/A	G	-0.05326	0.02877	-2.0457	0.0407761	2711	rs2568958
9:119731045	family.Planococcaceae.id.1753	T/G	G	-0.52606	0.25725	-2.0449	0.0408549	29	rs10817969
20:39997404	order.Enterobacteriales.id.3468	G/T	T	0.30389	0.14409	2.0449	0.0408746	252	rs143186028
20:39997404	family.Enterobacteriaceae.id.3469	G/T	T	0.30389	0.14409	2.0449	0.0408746	252	rs143186028
11:57650796	genus.Butyricicoccus.id.2055	C/T	T	-0.02485	0.01185	-2.044	0.0409535	17261	rs2509805
6:101387304	class.Deltaproteobacteria.id.3087	T/A	A	-0.0245	0.01172	-2.0438	0.0409733	15280	rs7758630
1:52342427	genus.LachnospiraceaeUCG006.id.11326	T/C	C	0.42138	0.20618	2.0437	0.0409931	43	rs1890946
11:61471678	genus.RikenellaceaeRC9gutgroup.id.11191	C/T	T	-0.06671	0.03311	-2.0432	0.0410129	3294	rs198457
2:22503044	genus.Faecalibacterium.id.2057	T/A	A	-0.0215	0.01051	-2.0431	0.0410326	18219	rs12052908
5:87545318	order.Bacillales.id.1674	C/T	C	0.05115	0.02455	2.0433	0.0410326	3366	rs3099439
16:13066833	genus.Alkalitalea.id.931	C/T	T	-0.44363	0.21716	-2.0429	0.0410524	50	rs7200826
16:21639710	genus.CandidatusSaccharimonas.id.11573	C/A	C	-0.55728	0.27282	-2.0427	0.0410722	23	rs12923444
8:65562019	genus.Alistipes.id.968	T/G	T	-0.03267	0.01521	-2.0427	0.0410722	17704	rs7837935
2:58012833	family.Lachnospiraceae.id.1987	C/T	T	-0.02198	0.01072	-2.0418	0.0411515	18473	rs1568452
18:53099012	genus.Lactococcus.id.1851	G/C	G	-0.04832	0.02385	-2.0415	0.0411912	4164	rs12967143
9:23737627	genus.Asaccharobacter.id.813	A/G	A	-0.07792	0.03829	-2.0416	0.0411912	1379	rs3793577
14:64697037	genus.Corynebacterium.id.449	T/C	T	-0.19372	0.09464	-2.0414	0.0412111	221	rs1152578
16:13066833	genus.unknowngenus.id.1854	C/T	T	-0.22292	0.10353	-2.0413	0.0412111	270	rs7200826
6:165121844	class.Clostridia.id.1859	A/T	A	0.02176	0.01053	2.0405	0.0413105	18473	rs2029865
2:86819128	family.Propionibacteriaceae.id.714	T/C	C	0.32188	0.15783	2.0394	0.0414101	141	rs7585722
2:22503044	genus.Lelliottia.id.14638	T/A	A	0.75324	0.3694	2.0391	0.04145	11	rs12052908
2:22503044	genus.Tyzzerella.id.11334	T/A	A	-0.05505	0.02725	-2.0383	0.0415099	2701	rs12052908
2:58012833	genus.Asaccharobacter.id.813	C/T	T	-0.08396	0.03925	-2.0383	0.0415099	1379	rs1568452
14:60141822	order.Oceanospirillales.id.3593	T/G	G	-0.1422	0.07015	-2.0381	0.0415299	553	rs1956373
1:175913828	class.Betaproteobacteria.id.2867	T/C	T	-0.02269	0.01117	-2.0379	0.0415499	17277	rs10913112
6:27835435	family.Porphyromonadaceae.id.943	A/G	G	-0.03275	0.01642	-2.0379	0.0415499	17643	rs200949
7:2110346	genus.RuminococcaceaeUCG008.id.11365	T/C	C	0.07561	0.03774	2.0377	0.04159	2200	rs3823624
7:109099919	genus.Ruminiclostridium9.id.11357	A/G	G	-0.02218	0.01097	-2.0373	0.04161	16841	rs58104186
10:1795194	genus.Parabacteroides.id.954	C/T	T	-0.02266	0.01104	-2.037	0.04165	17438	rs997934
4:42110353	genus.unknowngenus.id.1868	T/C	C	-0.04593	0.02211	-2.0369	0.04165	10169	rs34937911
1:8489302	genus.Pyramidobacter.id.3912	T/C	C	0.6858	0.33672	2.0367	0.0416901	15	rs301799
14:64697037	genus.RuminococcaceaeUCG003.id.11361	T/C	T	0.02423	0.01186	2.0365	0.0417102	14534	rs1152578
11:61471678	genus.Prevotella.id.963	C/T	T	0.07623	0.04002	2.0362	0.0417504	2146	rs198457
9:31124452	genus.Ruminococcus1.id.11373	C/G	C	0.02473	0.01198	2.0361	0.0417504	16170	rs34653192
18:35138245	family.Oxalobacteraceae.id.2966	G/A	A	-0.0421	0.02077	-2.0355	0.0417905	5231	rs12967855
18:50731802	genus.Diaphorobacter.id.2928	G/A	A	0.26604	0.13069	2.0356	0.0417905	114	rs7227069
2:58012833	genus.Ruminiclostridium1.id.11354	C/T	T	-0.07171	0.03541	-2.0349	0.0418509	1690	rs1568452
4:123186393	genus.Solobacterium.id.2161	A/G	G	-0.16285	0.07979	-2.0343	0.0419113	1538	rs45510091
3:117509984	genus.Alistipes.id.968	C/T	T	-0.02495	0.01231	-2.034	0.0419314	16930	rs6783233
7:2110346	genus.Hungatella.id.11306	T/C	C	0.05534	0.02691	2.0343	0.0419314	4279	rs3823624
11:113370758	genus..Eubacteriumxylanophilumgroup.id.14375	A/G	A	-0.02737	0.01288	-2.0338	0.0419516	13416	rs61902811
6:165121844	order.Clostridiales.id.1863	A/T	A	0.02169	0.01053	2.034	0.0419516	18473	rs2029865
16:7666402	genus.Phascolarctobacterium.id.2168	C/T	C	-0.02787	0.01387	-2.033	0.0420323	11238	rs7198928
11:30892824	family.Clostridiaceae1.id.1869	A/G	A	-0.02438	0.01195	-2.0328	0.0420525	14385	rs1448938
11:57650796	genus.Pseudobutyrivibrio.id.2010	C/T	T	0.07719	0.03984	2.0328	0.0420727	1704	rs2509805
7:109099919	genus.Eggerthella.id.819	A/G	G	-0.04055	0.01975	-2.0314	0.0422144	5203	rs58104186
4:123186393	genus.Megasphaera.id.2185	A/G	G	-0.20934	0.1012	-2.0306	0.0422956	929	rs45510091
2:208044470	genus.Halomonas.id.3616	A/G	A	-0.13747	0.06765	-2.0301	0.0423362	484	rs62188629
7:82936909	family.16d63.751.id.1801	C/T	T	-0.11145	0.05411	-2.0302	0.0423362	689	rs16887442
7:82936909	genus.unknowngenus.id.1000071828	C/T	T	-0.11145	0.05411	-2.0302	0.0423362	689	rs16887442
14:75130235	order.Desulfovibrionales.id.3156	T/G	T	-0.02341	0.01149	-2.03	0.0423565	15264	rs1045430
14:60141822	genus.Megamonas.id.2184	T/G	G	-0.09589	0.04877	-2.0297	0.0423769	1016	rs1956373
2:208044470	genus.Fusicatenibacter.id.11305	A/G	A	-0.0216	0.01165	-2.0287	0.0424787	17512	rs62188629
18:52488672	genus.Oxalobacter.id.2978	C/T	T	-0.0523	0.02455	-2.0284	0.042499	4710	rs62091461
1:80809636	family.unknownfamily.id.1000006161	G/A	A	0.04753	0.0225	2.0284	0.0425398	5107	rs113188507
1:80809636	genus.unknowngenus.id.1000006162	G/A	A	0.04753	0.0225	2.0284	0.0425398	5107	rs113188507
2:22503044	genus.unknowngenus.id.441	T/A	A	-0.07075	0.03538	-2.0281	0.0425398	1628	rs12052908
18:52488672	genus.RuminococcaceaeUCG007.id.11364	C/T	T	-0.06714	0.03143	-2.0277	0.0425807	2917	rs62091461
8:65562019	genus.Rhodococcus.id.464	T/G	T	-1.0586	0.52212	-2.0275	0.0426011	16	rs7837935
8:65562019	family.Nocardiaceae.id.460	T/G	T	-1.0586	0.52212	-2.0275	0.0426011	16	rs7837935
22:41487218	genus.unknowngenus.id.826	C/T	C	0.02921	0.01399	2.0269	0.0426829	12986	rs5995992
16:13755530	genus.Clostridiumsensustricto19.id.1883	A/G	G	0.49615	0.24479	2.0268	0.0427033	37	rs56887639
7:82454404	genus.Dorea.id.1997	C/G	C	0.02109	0.01073	2.0266	0.0427238	17741	rs2247523
11:57650796	phylum.Firmicutes.id.1672	C/T	T	-0.02421	0.01151	-2.0253	0.0428263	18462	rs2509805
14:60141822	genus.Klebsiella.id.3507	T/G	G	-0.10515	0.05244	-2.0253	0.0428263	893	rs1956373
9:23737627	genus.Enterococcus.id.1831	A/G	A	0.08321	0.04095	2.0255	0.0428263	1203	rs3793577
14:60141822	genus.Lachnoclostridium.id.11308	T/G	G	0.02465	0.01205	2.0254	0.0428468	18054	rs1956373
1:72765116	genus.Biostraticola.id.3471	G/A	G	-0.22238	0.09712	-2.0248	0.0428674	387	rs2568958
2:86819128	genus.ChristensenellaceaeR.7group.id.11283	T/C	C	-0.03303	0.01538	-2.0247	0.0428879	15834	rs7585722
1:72765116	genus.Shewanella.id.3400	G/A	G	0.17496	0.08632	2.0246	0.0429085	278	rs2568958
1:72765116	family.Shewanellaceae.id.3399	G/A	G	0.17496	0.08632	2.0246	0.0429085	278	rs2568958
11:57650796	genus.LachnospiraceaeUCG009.id.11329	C/T	T	0.34453	0.1702	2.0243	0.0429496	74	rs2509805
3:117509984	order.Thermoanaerobacterales.id.2112	C/T	T	0.06945	0.03409	2.0243	0.0429496	2141	rs6783233
7:12253880	genus.Slackia.id.825	A/G	A	-0.03713	0.01838	-2.0237	0.0429907	6088	rs2043539
3:117509984	genus.Haemophilus.id.3698	C/T	T	-0.03516	0.01724	-2.0232	0.0430525	8679	rs6783233
14:75130235	genus.Lactobacillus.id.1837	T/G	T	0.03439	0.01684	2.0228	0.0431144	7091	rs1045430
18:35138245	genus.Peptococcus.id.2037	G/A	A	-0.03971	0.0199	-2.0223	0.0431351	5701	rs12967855
9:36999369	genus.Parasporobacterium.id.2009	C/T	T	-0.115	0.05752	-2.0219	0.0431764	670	rs7030813
3:49214066	genus.Intestinibacter.id.11345	A/G	G	0.03184	0.01545	2.0218	0.043197	12009	rs13084037
16:13755530	family.Acidaminococcaceae.id.2166	A/G	G	0.02938	0.01414	2.0215	0.0432384	12658	rs56887639
18:52488672	phylum.Actinobacteria.id.400	C/T	T	0.02456	0.01242	2.0216	0.0432384	18122	rs62091461
3:157977962	genus.Enterorhabdus.id.820	C/T	C	-0.03349	0.01646	-2.0205	0.0433212	7551	rs1095626
3:117509984	family.16d63.751.id.1801	C/T	T	0.12242	0.06021	2.0205	0.0433419	689	rs6783233
3:117509984	genus.unknowngenus.id.1000071828	C/T	T	0.12242	0.06021	2.0205	0.0433419	689	rs6783233
14:64697037	genus.ErysipelotrichaceaeUCG004.id.11385	T/C	T	-0.15693	0.07773	-2.0201	0.0433627	337	rs1152578
2:58012833	class.Actinobacteria.id.419	C/T	T	0.02295	0.01137	2.0204	0.0433627	16446	rs1568452
7:109099919	genus.RuminococcaceaeUCG003.id.11361	A/G	G	-0.02374	0.01182	-2.02	0.0433834	14531	rs58104186
3:117509984	family.Thermoanaerobacteraceae.id.2126	C/T	T	0.06931	0.0341	2.0199	0.0434041	2140	rs6783233
10:1795194	order.Aeromonadales.id.3316	C/T	T	-0.20032	0.0992	-2.0194	0.0434249	231	rs997934
6:105365891	genus.unknowngenus.id.826	C/G	C	-0.02475	0.01234	-2.0196	0.0434249	13405	rs1933802
16:13066833	family.Pasteurellaceae.id.3689	C/T	T	-0.03219	0.01698	-2.019	0.0434664	9489	rs7200826
16:13066833	order.Pasteurellales.id.3688	C/T	T	-0.03219	0.01698	-2.019	0.0434664	9489	rs7200826
13:66941792	genus.Veillonella.id.2198	A/G	G	-0.0297	0.01464	-2.0188	0.0434872	9417	rs9592461
14:60141822	genus.Ralstonia.id.2909	T/G	G	-0.23191	0.11488	-2.0188	0.0434872	197	rs1956373
7:117502574	genus..Eubacteriumoxidoreducensgroup.id.11339	T/C	C	0.03926	0.01942	2.0191	0.0434872	5405	rs7807677
1:80809636	genus.LachnospiraceaeUCG003.id.11323	G/A	A	0.07113	0.03205	2.0189	0.043508	2552	rs113188507
12:23987925	genus.RikenellaceaeRC9gutgroup.id.11191	T/G	G	0.07905	0.03846	2.0175	0.0436538	3240	rs78337797
11:70544937	order.Burkholderiales.id.2874	A/G	G	0.02221	0.01091	2.0173	0.0436747	17218	rs7117514
12:84465022	family.FamilyXI.id.1936	G/T	G	-0.057	0.02853	-2.0171	0.0436747	3214	rs56314503
1:175913828	genus.Bilophila.id.3170	T/C	T	-0.02614	0.01291	-2.0171	0.0436747	12962	rs10913112
2:208044470	genus.Helicobacter.id.3279	A/G	A	0.21151	0.10356	2.0173	0.0436747	210	rs62188629
6:27835435	order.Cytophagales.id.990	A/G	G	-0.4933	0.24456	-2.0171	0.0436747	64	rs200949
6:27835435	class.Cytophagia.id.989	A/G	G	-0.4933	0.24456	-2.0171	0.0436747	64	rs200949
2:157111313	family.unknownfamily.id.987	C/T	C	-0.07377	0.03661	-2.0169	0.0436955	2278	rs1226412
2:157111313	genus.unknowngenus.id.1000013899	C/T	C	-0.07377	0.03661	-2.0169	0.0436955	2278	rs1226412
1:37192741	genus.Sporobacterium.id.2014	T/C	C	-0.3775	0.18722	-2.0164	0.0437373	62	rs1002656
2:58012833	genus.Senegalimassilia.id.11160	C/T	T	0.0353	0.01742	2.0168	0.0437373	6977	rs1568452
9:23737627	genus.Epulopiscium.id.1998	A/G	A	0.57273	0.28405	2.0163	0.0437791	21	rs3793577
13:53647048	genus.RuminococcaceaeUCG005.id.11363	C/A	A	0.0243	0.0115	2.016	0.0438	16235	rs1343605
4:3207142	class.Melainabacteria.id.1589	A/G	G	-0.03735	0.01851	-2.0159	0.0438	5943	rs7685686
12:84465022	genus.Solobacterium.id.2161	G/T	G	-0.07871	0.03781	-2.0156	0.0438418	1858	rs56314503
2:58012833	family.Marinilabiaceae.id.929	C/T	T	-0.39387	0.19542	-2.0155	0.0438418	53	rs1568452
13:66941792	family.Propionibacteriaceae.id.714	A/G	G	-0.23694	0.11757	-2.0154	0.0438627	141	rs9592461
12:23987925	genus.Bifidobacterium.id.436	T/G	G	-0.03759	0.01865	-2.0147	0.0439256	14046	rs78337797
14:60141822	genus..Eubacteriumruminantiumgroup.id.11340	T/G	G	-0.03595	0.01823	-2.0144	0.0439466	7823	rs1956373
16:21639710	genus.Faecalicoccus.id.11391	C/A	C	0.21181	0.10443	2.0146	0.0439676	181	rs12923444
1:197704717	genus.RuminococcaceaeUCG014.id.11371	C/T	T	0.02816	0.0152	2.0144	0.0439885	14536	rs17641524
4:3207142	genus.Pyramidobacter.id.3912	A/G	G	0.66496	0.33017	2.014	0.0440095	15	rs7685686
7:82936909	genus.Staphylococcus.id.1780	C/T	T	0.15253	0.0759	2.0141	0.0440095	340	rs16887442
14:75130235	family.Lactobacillaceae.id.1836	T/G	T	0.03378	0.01673	2.014	0.0440305	7192	rs1045430
2:208044470	genus.Acinetobacter.id.3711	A/G	A	0.13498	0.06698	2.0135	0.0440726	492	rs62188629
10:1795194	genus.Olsenella.id.822	C/T	T	-0.04735	0.02349	-2.0126	0.0441567	3797	rs997934
14:75130235	family.Staphylococcaceae.id.1775	T/G	T	0.144	0.07209	2.0123	0.0441989	371	rs1045430
1:197704717	family.Leptotrichiaceae.id.2215	C/T	T	-0.3627	0.1803	-2.0116	0.044241	88	rs17641524
3:157977962	family.Veillonellaceae.id.2172	C/T	C	-0.02274	0.01129	-2.0116	0.044241	16109	rs1095626
7:12253880	genus.unknowngenus.id.826	A/G	A	-0.02512	0.01241	-2.0112	0.0443043	13404	rs2043539
9:119731045	order.OpitutaevadinHA64.id.11585	T/G	G	-0.07725	0.03889	-2.011	0.0443043	1615	rs10817969
9:119731045	family.unknownfamily.id.1000000271	T/G	G	-0.07725	0.03889	-2.011	0.0443043	1615	rs10817969
9:119731045	genus.unknowngenus.id.1000000272	T/G	G	-0.07725	0.03889	-2.011	0.0443043	1615	rs10817969
1:72765116	genus.Peptococcus.id.2037	G/A	G	-0.04199	0.01935	-2.0103	0.0443889	5703	rs2568958
3:49214066	genus.Ruminococcus1.id.11373	A/G	G	-0.02572	0.01341	-2.0096	0.0444735	16050	rs13084037
9:31124452	genus.PrevotellaceaeUCG001.id.11186	C/G	C	-0.16435	0.08053	-2.0094	0.0444947	336	rs34653192
11:30892824	genus.Mannheimia.id.3701	A/G	A	0.4739	0.2359	2.0089	0.0445583	33	rs1448938
18:35138245	family.Clostridiaceae1.id.1869	G/A	A	-0.02482	0.01249	-2.0084	0.0445796	14379	rs12967855
18:53099012	genus.RuminococcaceaeV9D2013group.id.11372	G/C	G	-0.14481	0.07207	-2.0085	0.0445796	469	rs12967143
5:93071630	genus.Campylobacter.id.3275	G/C	C	-0.1175	0.05748	-2.0082	0.0446008	841	rs10061069
16:6315880	genus.Pseudocitrobacter.id.14642	A/G	G	-0.10945	0.05439	-2.0076	0.0446645	764	rs7193263
1:175913828	genus.Asaccharobacter.id.813	T/C	T	-0.08235	0.03923	-2.0077	0.0446645	1379	rs10913112
9:126634255	genus.Desulfovibrio.id.3173	C/T	C	-0.03276	0.01653	-2.007	0.0447284	9334	rs2670139
9:31124452	genus.Ruminiclostridium5.id.11355	C/G	C	0.02338	0.01167	2.0073	0.0447284	17039	rs34653192
6:165121844	genus.Isobaculum.id.1822	A/T	A	-0.50386	0.25117	-2.006	0.0448349	28	rs2029865
1:8489302	genus.Lelliottia.id.14638	T/C	C	-0.74414	0.37107	-2.0054	0.0449203	11	rs301799
20:44680853	genus.Alistipes.id.968	A/G	A	0.02432	0.01225	2.0056	0.0449203	17604	rs12624433
2:22503044	genus.unknowngenus.id.2041	T/A	A	0.03164	0.01585	2.005	0.0449844	7988	rs12052908
20:39997404	family.Staphylococcaceae.id.1775	G/T	T	0.47203	0.23551	2.0043	0.0450486	85	rs143186028
1:8489302	genus.Butyrivibrio.id.1993	T/C	C	-0.04791	0.02411	-2.0034	0.0451129	3515	rs301799
14:75130235	class.Deltaproteobacteria.id.3087	T/G	T	-0.02308	0.01148	-2.0033	0.0451344	15288	rs1045430
1:52342427	genus.Mogibacterium.id.1960	T/C	C	0.06483	0.03223	2.0035	0.0451344	1917	rs1890946
3:49214066	genus.unknowngenus.id.1000077492	A/G	G	-0.45136	0.22397	-2.0034	0.0451344	64	rs13084037
12:84465022	genus.Oxalobacter.id.2978	G/T	G	0.04856	0.02401	2.0032	0.0451558	4711	rs56314503
2:86819128	genus.Ezakiella.id.11289	T/C	C	-0.11437	0.05437	-2.0032	0.0451558	1219	rs7585722
14:64697037	genus.ErysipelotrichaceaeUCG003.id.11384	T/C	T	-0.02304	0.01166	-2.003	0.0451773	15032	rs1152578
1:73668836	genus.Blautia.id.1992	A/G	A	-0.02159	0.01051	-2.0021	0.0452632	18408	rs10890020
9:120484009	class.Deltaproteobacteria.id.3087	A/G	G	-0.02717	0.01224	-2.0021	0.0452632	15288	rs913930
10:1795194	genus.Haemophilus.id.3698	C/T	T	0.03037	0.01518	2.0021	0.0452847	9201	rs997934
11:88744425	order.Enterobacteriales.id.3468	C/T	T	-0.02464	0.01217	-2.0019	0.0452847	13711	rs7932640
11:88744425	family.Enterobacteriaceae.id.3469	C/T	T	-0.02464	0.01217	-2.0019	0.0452847	13711	rs7932640
1:8489302	genus.Lachnoclostridium12.id.11311	T/C	C	0.3217	0.14557	2.0021	0.0452847	135	rs301799
2:22503044	genus.Tyzzerella4.id.11336	T/A	A	0.06834	0.03413	2.002	0.0452847	1729	rs12052908
14:42074726	family.BacteroidalesS24.7group.id.11173	A/G	G	-0.03247	0.01612	-2.0011	0.0453708	7707	rs61990288
14:42074726	genus.unknowngenus.id.1000005479	A/G	G	-0.03247	0.01612	-2.0011	0.0453708	7707	rs61990288
6:66565703	genus.Eubacterium.id.1932	T/C	C	0.35765	0.17872	2.0012	0.0453924	69	rs9363467
1:37192741	family.Peptococcaceae.id.2024	T/C	C	0.0295	0.01483	2.0009	0.045414	10792	rs1002656
9:36999369	genus.Flavonifractor.id.2059	C/T	T	0.0285	0.01401	2.0008	0.045414	10848	rs7030813
6:27835435	genus..Bacteroidespectinophilusgroup.id.14371	A/G	G	-1.0609	0.53032	-2.0005	0.0454355	15	rs200949
9:31124452	family.Defluviitaleaceae.id.1924	C/G	C	0.03419	0.01688	2.0004	0.0454787	7999	rs34653192
4:42110353	genus.Acetitomaculum.id.1989	T/C	C	0.24539	0.12498	2.0001	0.0455003	320	rs34937911
5:93071630	genus.PrevotellaceaeNK3B31group.id.11185	G/C	C	0.08295	0.04339	2.0001	0.0455003	1675	rs10061069
11:65314830	genus.Coprococcus3.id.11303	A/T	T	0.02835	0.01417	1.9998	0.0455219	15967	rs58621819
16:13066833	family.Comamonadaceae.id.2913	C/T	T	0.16624	0.08365	1.9994	0.0455867	354	rs7200826
8:65562019	genus.RuminococcaceaeUCG002.id.11360	T/G	T	-0.03132	0.01539	-1.9983	0.0456733	17230	rs7837935
11:65314830	genus.Tyzzerella3.id.11335	A/T	T	-0.05111	0.02401	-1.9977	0.0457383	5482	rs58621819
14:42074726	genus.unknowngenus.id.1000003999	A/G	G	0.05696	0.02892	1.9979	0.0457383	2410	rs61990288
14:60141822	family.Halomonadaceae.id.3610	T/G	G	-0.13956	0.07028	-1.9976	0.04576	551	rs1956373
16:6315880	genus..Eubacteriumcoprostanoligenesgroup.id.11375	A/G	G	0.02207	0.01129	1.9977	0.04576	17502	rs7193263
11:88744425	genus.Phascolarctobacterium.id.2168	C/T	T	0.02685	0.01344	1.9964	0.0459122	11240	rs7932640
20:39997404	genus.Lactonifactor.id.11332	G/T	T	0.33709	0.1692	1.9964	0.0459122	173	rs143186028
1:67146817	order.Bacillales.id.1674	T/C	C	-0.05342	0.02503	-1.9957	0.0459557	3366	rs10789214
4:42110353	family.Christensenellaceae.id.1866	T/C	C	-0.03528	0.01746	-1.9948	0.0460647	16325	rs34937911
9:126634255	genus.Eggerthella.id.819	C/T	C	-0.04439	0.02213	-1.9947	0.0460647	5203	rs2670139
9:126634255	family.Leuconostocaceae.id.1839	C/T	C	-0.06531	0.03386	-1.9946	0.0460647	2320	rs2670139
5:93071630	genus.Clostridiumsensustricto19.id.1883	G/C	C	0.53791	0.26967	1.9947	0.0460865	37	rs10061069
3:49214066	family.Campylobacteraceae.id.3273	A/G	G	0.11462	0.05745	1.9945	0.0461084	863	rs13084037
1:197704717	genus.Raoultella.id.3521	C/T	T	-0.49974	0.25062	-1.994	0.0461302	104	rs17641524
11:70544937	genus.Erysipelatoclostridium.id.11381	A/G	G	-0.02871	0.01432	-1.9936	0.0461739	9909	rs7117514
18:52488672	genus.LachnospiraceaeNC2004group.id.11316	C/T	T	0.0411	0.02086	1.993	0.0462615	6461	rs62091461
2:58012833	genus.Clostridiumsensustricto1.id.1873	C/T	T	-0.02429	0.0122	-1.9928	0.0462834	14254	rs1568452
6:27835435	genus.Alloscardovia.id.435	A/G	G	0.4125	0.20698	1.9929	0.0462834	95	rs200949
2:157111313	family.Gracilibacteraceae.id.1975	C/T	C	-0.50288	0.2524	-1.9924	0.0463272	44	rs1226412
2:157111313	genus.unknowngenus.id.1978	C/T	C	-0.50288	0.2524	-1.9924	0.0463272	44	rs1226412
13:53647048	genus.Undibacterium.id.2983	C/A	A	-0.53632	0.26924	-1.992	0.0463491	25	rs1343605
18:52488672	genus.RuminococcaceaeV9D2013group.id.11372	C/T	T	0.1545	0.07831	1.9919	0.046393	469	rs62091461
14:75130235	order.Pseudomonadales.id.3709	T/G	T	0.07756	0.03768	1.9916	0.046415	1386	rs1045430
1:52342427	genus.Holdemania.id.2157	T/C	C	-0.03298	0.01498	-1.9915	0.046415	9193	rs1890946
18:52488672	family.Actinomycetaceae.id.421	C/T	T	0.03948	0.01908	1.9912	0.0464809	7836	rs62091461
2:208044470	genus.Victivallis.id.2256	A/G	A	-0.05398	0.02649	-1.9908	0.0464809	3373	rs62188629
11:57650796	genus.Campylobacter.id.3275	C/T	T	0.10636	0.05435	1.9904	0.0465469	836	rs2509805
9:119731045	genus.unknowngenus.id.3624	T/G	G	0.2047	0.10271	1.9905	0.0465469	229	rs10817969
6:66565703	genus.Tyzzerella3.id.11335	T/C	C	0.15332	0.07668	1.9903	0.0465689	393	rs9363467
6:105365891	genus.Atopobium.id.814	C/G	C	0.09889	0.04941	1.99	0.0465909	826	rs1933802
3:44736493	family.Enterococcaceae.id.1828	T/C	C	-0.33546	0.16861	-1.9896	0.046613	92	rs4346585
5:61509655	family.Moraxellaceae.id.3710	C/T	T	0.11362	0.05663	1.9898	0.046613	616	rs60157091
10:1795194	genus.RuminococcaceaeUCG007.id.11364	C/T	T	-0.05455	0.02678	-1.9896	0.046635	2917	rs997934
3:157977962	genus.Senegalimassilia.id.11160	C/T	C	-0.03411	0.01714	-1.9894	0.046635	6977	rs1095626
2:208044470	family.Helicobacteraceae.id.3278	A/G	A	0.20874	0.10358	1.9894	0.0466791	210	rs62188629
1:67146817	order.Bacteroidales.id.913	T/C	C	-0.01956	0.01076	-1.9885	0.0467454	18467	rs10789214
1:67146817	class.Bacteroidia.id.912	T/C	C	-0.01956	0.01076	-1.9885	0.0467454	18467	rs10789214
11:88744425	family.Carnobacteriaceae.id.1811	C/T	T	0.05573	0.02785	1.9881	0.0468117	2594	rs7932640
11:57650796	genus.CoriobacteriaceaeUCG002.id.11158	C/T	T	0.16787	0.08293	1.988	0.0468338	334	rs2509805
14:75130235	genus.Blautia.id.1992	T/G	T	-0.02129	0.01046	-1.9875	0.046856	18409	rs1045430
1:67146817	genus.unknowngenus.id.826	T/C	C	-0.02431	0.01252	-1.9875	0.046856	13405	rs10789214
22:41487218	genus.unknowngenus.id.3624	C/T	C	0.21314	0.10711	1.9877	0.046856	229	rs5995992
5:61509655	class.Actinobacteria.id.419	C/T	T	-0.02209	0.01107	-1.987	0.0469002	16441	rs60157091
5:103972357	genus..Eubacteriumbrachygroup.id.11296	G/A	A	0.04624	0.02372	1.9871	0.0469224	4046	rs30266
6:27835435	family.Ruminococcaceae.id.2050	A/G	G	-0.03174	0.01628	-1.987	0.0469224	17946	rs200949
11:30892824	genus.RuminococcaceaeUCG004.id.11362	A/G	A	-0.02918	0.01462	-1.9861	0.0470111	9635	rs1448938
20:39997404	genus.Gordonibacter.id.821	G/T	T	-0.7575	0.38144	-1.9859	0.0470333	39	rs143186028
7:82454404	genus.Sellimonas.id.14369	C/G	C	-0.05039	0.02502	-1.9859	0.0470333	3202	rs2247523
16:7666402	genus.Turicibacter.id.2162	C/T	C	0.03021	0.01535	1.9855	0.0471	9079	rs7198928
1:52342427	family.Peptostreptococcaceae.id.2042	T/C	C	-0.01939	0.01136	-1.9848	0.0471445	16194	rs1890946
2:157111313	genus.Megamonas.id.2184	C/T	C	-0.10647	0.05079	-1.9849	0.0471445	1014	rs1226412
9:31124452	genus.Desulfovibrio.id.3173	C/G	C	0.02983	0.01596	1.9846	0.0472113	8986	rs34653192
1:52342427	family.Neisseriaceae.id.3010	T/C	C	-0.38351	0.19329	-1.9841	0.0472335	50	rs1890946
11:88744425	genus.Adlercreutzia.id.812	C/T	T	-0.03105	0.01568	-1.984	0.0472558	8243	rs7932640
1:37192741	genus..Eubacteriumrectalegroup.id.14374	T/C	C	0.02348	0.01161	1.9841	0.0472558	17484	rs1002656
2:22503044	genus..Eubacteriumruminantiumgroup.id.11340	T/A	A	0.03193	0.01603	1.9839	0.0472781	7823	rs12052908
14:42074726	genus.unknowngenus.id.959	A/G	G	0.04224	0.02157	1.9836	0.0473005	4323	rs61990288
3:49214066	genus.Sellimonas.id.14369	A/G	G	-0.06185	0.02975	-1.9833	0.0473228	3202	rs13084037
10:1795194	genus.Acetanaerobacterium.id.2051	C/T	T	-0.0914	0.04539	-1.983	0.0473674	1021	rs997934
2:58012833	genus.Tyzzerella3.id.11335	C/T	T	-0.03913	0.01957	-1.9827	0.0473898	5483	rs1568452
6:165121844	genus.Mitsuokella.id.2186	A/T	A	-0.07914	0.03783	-1.9827	0.0473898	1452	rs2029865
1:67146817	genus.Parabacteroides.id.954	T/C	C	-0.02096	0.01108	-1.9821	0.0474569	17438	rs10789214
9:126634255	genus.Butyrivibrio.id.1993	C/T	C	-0.05212	0.0268	-1.9821	0.0474569	3513	rs2670139
16:6315880	family.Christensenellaceae.id.1866	A/G	G	0.02286	0.01146	1.9822	0.0474792	16969	rs7193263
4:42110353	family.Succinivibrionaceae.id.3326	T/C	C	0.29844	0.15057	1.9821	0.0474792	227	rs34937911
9:36999369	class.Alphaproteobacteria.id.2379	C/T	T	0.02933	0.01484	1.9817	0.047524	9653	rs7030813
11:30892824	genus.Rhodococcus.id.464	A/G	A	0.63031	0.31811	1.9814	0.0475464	16	rs1448938
11:30892824	family.Nocardiaceae.id.460	A/G	A	0.63031	0.31811	1.9814	0.0475464	16	rs1448938
3:44736493	family.Victivallaceae.id.2255	T/C	C	0.16331	0.08325	1.9816	0.0475464	384	rs4346585
2:86819128	genus.Megasphaera.id.2185	T/C	C	0.09587	0.04699	1.9811	0.0475913	1701	rs7585722
9:126634255	genus.LachnospiraceaeUCG008.id.11328	C/T	C	0.03747	0.01891	1.9804	0.0476586	7139	rs2670139
1:8489302	genus.Enterococcus.id.1831	T/C	C	0.0877	0.04234	1.9802	0.0476811	1203	rs301799
5:87545318	genus.LachnospiraceaeNC2004group.id.11316	C/T	C	-0.03514	0.01777	-1.9797	0.047726	6462	rs3099439
9:23737627	phylum.Firmicutes.id.1672	A/G	A	0.02056	0.01046	1.9792	0.047816	18473	rs3793577
11:113370758	genus.Serratia.id.3523	A/G	A	-0.47735	0.24127	-1.9785	0.0478611	33	rs61902811
11:88744425	genus.Prevotella6.id.11181	C/T	T	-0.14199	0.06969	-1.9784	0.0478611	408	rs7932640
1:197704717	genus.ChristensenellaceaeR.7group.id.11283	C/T	T	0.02765	0.01431	1.9788	0.0478611	16458	rs17641524
6:165121844	genus.RuminococcaceaeUCG004.id.11362	A/T	A	0.02897	0.01456	1.9785	0.0478836	9635	rs2029865
3:49214066	genus.PrevotellaceaeNK3B31group.id.11185	A/G	G	0.08514	0.04101	1.978	0.0479287	1675	rs13084037
7:12253880	genus.Peptococcus.id.2037	A/G	A	0.03823	0.01899	1.9781	0.0479287	5702	rs2043539
16:7666402	genus.RuminococcaceaeUCG011.id.11368	C/T	C	0.04749	0.024	1.9778	0.0479513	3673	rs7198928
2:86819128	genus..Eubacteriumtenuegroup.id.14380	T/C	C	-0.49412	0.2499	-1.9773	0.0479964	47	rs7585722
14:75130235	family.Defluviitaleaceae.id.1924	T/G	T	0.03082	0.01561	1.977	0.0480416	8244	rs1045430
1:67146817	genus.Christensenella.id.1867	T/C	C	0.10773	0.05223	1.9739	0.0484045	825	rs10789214
6:27835435	genus.Finegoldia.id.1940	A/G	G	-0.28808	0.12448	-1.9738	0.0484045	356	rs200949
1:80809636	family.Leptotrichiaceae.id.2215	G/A	A	-0.33877	0.17168	-1.9733	0.04845	88	rs113188507
1:175913828	family.Alcaligenaceae.id.2875	T/C	T	-0.02219	0.01129	-1.9731	0.0484728	16925	rs10913112
9:2983774	genus.Pseudoflavonifractor.id.2066	A/C	C	0.05983	0.0297	1.9734	0.0484728	2395	rs1354115
14:42074726	genus.Acetitomaculum.id.1989	A/G	G	0.15514	0.07858	1.9731	0.0484956	320	rs61990288
3:61192911	genus.Acidaminococcus.id.2167	A/G	A	-0.15915	0.0798	-1.9723	0.048564	327	rs141954845
4:3207142	genus.Pseudomonas.id.3723	A/G	G	0.10424	0.05272	1.9723	0.0485868	729	rs7685686
16:21639710	genus.Alloprevotella.id.961	C/A	C	0.05069	0.02596	1.9717	0.0486553	3052	rs12923444
11:70544937	genus.RuminococcaceaeUCG007.id.11364	A/G	G	0.05187	0.02627	1.9709	0.0487468	2916	rs7117514
1:37192741	genus.Parasutterella.id.2892	T/C	C	0.02774	0.01435	1.9709	0.0487468	11440	rs1002656
18:52488672	order.Actinomycetales.id.420	C/T	T	0.03909	0.01908	1.9705	0.0487925	7837	rs62091461
3:49214066	genus.LachnospiraceaeFCS020group.id.11314	A/G	G	-0.0294	0.01461	-1.9703	0.0487925	13371	rs13084037
12:84465022	genus.unknowngenus.id.1000036183	G/T	G	-0.13735	0.07167	-1.9699	0.0488384	475	rs56314503
1:73668836	genus.unknowngenus.id.2041	A/G	A	0.03079	0.01589	1.9696	0.0488842	7988	rs10890020
9:119731045	genus.Prevotella7.id.11182	T/G	G	-0.05249	0.02604	-1.9693	0.0489072	3610	rs10817969
[truncated: 35,069 more rows]

## Sheet: Supplementary Table 8
Association reults of MDD GRS with microbial taxa
[truncated: 434 more rows]
